# Supplementary material for: Epigenome-wide association study of bronchopulmonary dysplasia in preterm infants: results from the discovery-BPD program
Source: Clin Epigenetics. 2022 Apr 28;14:57. doi: 10.1186/s13148-022-01272-0 (PMC9052529; doi:10.1186/s13148-022-01272-0)
Supplement: Supplementary file 1 — Additional file 1. Table S1. Cohort demographics by bronchopulmonary dysplasia (BPD) status (n = 107). Table S2. Distribution of cord blood cell types and methylation status of a tobacco smoke epigenetic biomarker in neonates with or without bronchopulmonary dysplasia (BPD). Table S3. Differentially methylated CpG sites associated with nucleated red blood cell (NRBC) counts. Table S4. Differentially methylated CpG sites associated with bronchopulmonary dysplasia (BPD) risk and their annotated gene information. Table S5. The number of probes identified by differential methylation analysis. Table S6. Association of stochastic epimutation load (EML) with bronchopulmonary dysplasia (BPD) and other covariates. Table S7A. Biological functions and pathways of the genes annotated to the differentially methylated CpG sites (FDR 5%) associated with bronchopulmonary dysplasia (BPD) risk. Table S7B. GOmeth enriched GO terms on CpGs associated with BPD risk. Table S7C. GOmeth enriched KEGG pathways on CpGs associated with BPD risk. Table S8. cDNA microarray determined differentially expressed genes in cord blood cells of infants with bronchopulmonary dysplasia (BPD). Table S9. DNA CpG methylation sites associated with gestational age (GA) or birth weight (BW). [file 13148_2022_1272_MOESM1_ESM.pdf]

**Table S1.** Cohort demographics by bronchopulmonary dysplasia (BPD) status (n=107).

| Characteristics                                             | BPD                | NonBPD               |
|-------------------------------------------------------------|--------------------|----------------------|
| <b>Neonate characteristics</b>                              |                    |                      |
| Sample size                                                 | 14 <sup>a</sup>    | 93                   |
| Birth weight (g)                                            | 925.9 ± 79.7       | 1187.9 ± 25.2        |
| Gestation age (Weeks)                                       | 27.6 ± 0.7         | 30.3 ± 0.2           |
| Gender                                                      | Male 9<br>Female 5 | Male 31<br>Female 62 |
| Cumulative NICU O <sub>2</sub> (Days)                       | 47.1 ± 5.2         | 7.8 ± 1.1            |
| Delivery room resuscitation O <sub>2</sub> only             | 0                  | 27/93 (29%)          |
| Delivery room surfactant                                    | 1/12 (8%)          | 4/86 (5%)            |
| Respiratory distress diagnosis for NICU                     | 9/12 (75%)         | 41/86 (48%)          |
| Multiple birth                                              | 2/14 (14%)         | 28/93 (30%)          |
| <b>Maternal characteristics and pregnancy complications</b> |                    |                      |
| Maternal ace                                                |                    |                      |
| European-Latin                                              | 11                 | 68                   |
| Criollos                                                    | 0                  | 14                   |
| European-other                                              | 0                  | 5                    |
| Jewish                                                      | 1                  | 3                    |
| Arab-Middle Eastern                                         | 1                  | 0                    |
| African Caribbean                                           | 0                  | 1                    |
| Native American                                             | 1                  | 0                    |
| Asian                                                       | 0                  | 1                    |
| Unknown or Refused                                          | 0                  | 1                    |
| Maternal age (Year)                                         | 32.2 ± 1.9         | 34.1 ± 0.5           |
| Cesarean section                                            | 10/12 (83%)        | 84/87 (97%)          |
| Maternal smoking history <sup>b</sup>                       | 7/14 (50%)         | 24/93 (27%)          |
| Maternal antenatal steroid                                  | 13/13 (100%)       | 82/90 (91%)          |
| Maternal pre-eclampsia                                      | 3/14 (21%)         | 25/93 (27%)          |
| IUGR-reason for delivery                                    | 5/12 (42%)         | 33/90 (37%)          |
| BMI                                                         | 33.6 ± 1.8         | 34.1 ± 5.2           |
| Education <sup>c</sup>                                      | 9/4/0/1            | 63/20/5/5            |
| Employed first trimester                                    | 10/13 (77%)        | 69/88 (78%)          |
| Alcohol use during pregnancy                                | 0                  | 1/88 (1%)            |
| Chorioamnionitis                                            | 2/12 (17%)         | 6/85 (7%)            |
| Asthma                                                      | 0                  | 0                    |
| Other respiratory disease                                   | 0                  | 0                    |
| Gestational diabetes                                        | 0                  | 1/90 (1%)            |
| Previous preterm pregnancy                                  | 9/13 (69%)         | 50/90 (56%)          |
| Assisted reproduction                                       | 2/13 (15%)         | 27/90 (30%)          |
| <b>Fetal complications</b>                                  |                    |                      |
| Fetal IUGR                                                  | 5/12 (42%)         | 38/88 (43%)          |
| Fetal oligohydramnios                                       | 3/12 (25%)         | 11/88 (13%)          |
| Fetal decelerations                                         | 1/12 (8%)          | 1/88 (1%)            |
| Fetal bradycardia                                           | 1/12 (8%)          | 1/88 (1%)            |

Samples recruited from the Discovery-Bronchopulmonary Dysplasia Program (D-BPD) cohort in Buenos Aires, Argentina. Mean ± S.E.M. presented. NICU= newborn intensive care unit. O<sub>2</sub>= oxygen supplement. IUGR= intrauterine growth restriction. BMI= body mass index. <sup>a</sup> One neonate with BPD deceased at 14 days of life. <sup>b</sup> Self-reported former and/or current smoker. <sup>c</sup> Higher/Secondary/Primary/NA.

**Table S2. Distribution of cord blood cell types and methylation status of a tobacco smoke epigenetic biomarker in neonates with or without bronchopulmonary dysplasia (BPD).**

| Sample_Name | Sample_Group | Sex | Birth weight (g) | GA (weeks) | CD8T (%) | CD4T (%) | NK (%) | B cell (%) | Mono (%) | Gran (%) | NRBC (%) | *cg05575921 methylation (%) | Hospital code | Cumulative Days O2 |
|-------------|--------------|-----|------------------|------------|----------|----------|--------|------------|----------|----------|----------|-----------------------------|---------------|--------------------|
| 1007_1      | BPD          | M   | 839              | 26.5       | 2.47     | 2.89     | 0.07   | 0.00       | 0.00     | 0.00     | 97.16    | 66.72                       | 1             | 53                 |
| 1009_2      | BPD          | M   | 1418             | 30         | 22.58    | 27.34    | 0.00   | 24.28      | 10.91    | 13.81    | 10.87    | 82.11                       | 1             | 53                 |
| 1012_1      | BPD          | M   | 1321             | 32         | 27.80    | 19.46    | 6.90   | 11.86      | 4.57     | 10.50    | 22.48    | 83.81                       | 1             | 57                 |
| 1013_1      | BPD          | M   | 1010             | 29         | 21.75    | 14.03    | 0.00   | 26.40      | 7.03     | 24.11    | 9.29     | 82.28                       | 1             | 59                 |
| 1014_1      | BPD          | F   | 787              | 26.1       | 8.97     | 6.58     | 2.60   | 14.24      | 11.85    | 40.05    | 24.79    | 87.28                       | 1             | 14                 |
| 1037_1      | BPD          | M   | 822              | 25         | 13.32    | 16.72    | 0.07   | 12.25      | 12.94    | 32.68    | 17.32    | 75.26                       | 1             | 66                 |
| 2002_1      | BPD          | F   | 1385             | 31         | 22.37    | 50.13    | 0.00   | 8.66       | 1.75     | 8.07     | 14.30    | 80.57                       | 2             | 30                 |
| 2003_2      | BPD          | M   | 724              | 27.5       | 12.16    | 9.43     | 0.00   | 5.08       | 0.00     | 0.00     | 78.82    | 76.08                       | 2             | 41                 |
| 2012_1      | BPD          | M   | 1022             | 28         | 18.21    | 27.11    | 0.00   | 18.18      | 13.83    | 19.27    | 12.14    | 84.28                       | 2             | 22                 |
| 2014_1      | BPD          | M   | 580              | 26         | 6.71     | 2.94     | 1.75   | 1.71       | 0.75     | 0.00     | 94.83    | 69.09                       | 2             | 49                 |
| 2017_1      | BPD          | F   | 519              | 25         | 7.43     | 5.60     | 0.00   | 5.83       | 1.35     | 0.00     | 89.07    | 69.16                       | 2             | 53                 |
| 3013_1      | BPD          | F   | 950              | 26         | 5.04     | 6.46     | 3.74   | 7.56       | 11.65    | 54.30    | 18.46    | 86.96                       | 3             | 48                 |
| 3017_1      | BPD          | M   | 875              | 29.8       | 8.95     | 21.79    | 5.40   | 18.39      | 10.66    | 11.27    | 14.62    | 86.42                       | 3             | 45                 |
| 4005_1      | BPD          | F   | 710              | 24         | 9.66     | 3.00     | 0.95   | 8.70       | 11.35    | 61.60    | 7.74     | 68.93                       | 4             | 70                 |
| 1001_1      | nonBPD       | M   | 1397             | 28         | 11.03    | 10.82    | 0.71   | 10.05      | 14.71    | 44.79    | 15.67    | 84.39                       | 1             | 0                  |
| 1002_1      | nonBPD       | F   | 1152             | 29         | 9.50     | 8.08     | 0.50   | 10.43      | 5.16     | 14.20    | 60.09    | 70.52                       | 1             | 1                  |
| 1003_1      | nonBPD       | F   | 1455             | 31         | 16.01    | 29.28    | 0.00   | 17.45      | 7.86     | 24.58    | 6.77     | 91.99                       | 1             | 5                  |
| 1004_1      | nonBPD       | F   | 1205             | 28.2       | 15.39    | 18.84    | 1.55   | 14.65      | 4.98     | 5.60     | 49.22    | 74.67                       | 1             | 12                 |
| 1005_1      | nonBPD       | F   | 1230             | 32         | 13.72    | 12.45    | 1.20   | 4.31       | 2.98     | 2.74     | 68.17    | 74.66                       | 1             | 1                  |
| 1006_1      | nonBPD       | F   | 1360             | 28.5       | 26.03    | 28.36    | 0.00   | 13.61      | 8.29     | 16.11    | 17.77    | 84.75                       | 1             | 8                  |
| 1009_1      | nonBPD       | F   | 1352             | 30         | 12.55    | 23.52    | 0.00   | 12.06      | 3.91     | 4.46     | 49.17    | 72.66                       | 1             | 1                  |
| 1010_1      | nonBPD       | F   | 1075             | 30.5       | 18.73    | 23.03    | 0.00   | 20.48      | 9.68     | 17.38    | 20.21    | 83.14                       | 1             | 0                  |
| 1011_1      | nonBPD       | F   | 714              | 30.3       | 19.94    | 32.90    | 0.00   | 14.27      | 3.94     | 2.00     | 31.26    | 76.80                       | 1             | 21                 |
| 1015_1      | nonBPD       | M   | 1253             | 29         | 19.28    | 30.45    | 0.00   | 16.66      | 5.28     | 4.70     | 28.54    | 86.49                       | 1             | 22                 |
| 1016_1      | nonBPD       | F   | 878              | 32         | 15.06    | 8.31     | 2.83   | 2.51       | 7.34     | 57.32    | 7.84     | 91.44                       | 1             | 0                  |
| 1017_1      | nonBPD       | F   | 1391             | 33.5       | 13.59    | 20.56    | 0.00   | 12.06      | 4.95     | 42.76    | 10.59    | 84.85                       | 1             | 0                  |
| 1018_1      | nonBPD       | F   | 687              | 30         | 21.12    | 38.06    | 0.00   | 2.14       | 0.14     | 2.87     | 39.62    | 81.64                       | 1             | 5                  |
| 1019_1      | nonBPD       | F   | 855              | 25         | 14.44    | 15.40    | 0.00   | 9.79       | 9.38     | 21.40    | 36.35    | 80.94                       | 1             | 46                 |
| 1020_1      | nonBPD       | F   | 1417             | 32         | 17.50    | 39.74    | 0.00   | 13.09      | 9.84     | 12.07    | 12.94    | 88.60                       | 1             | 7                  |
| 1021_1      | nonBPD       | F   | 1269             | 34         | 19.66    | 13.60    | 2.90   | 13.70      | 9.65     | 28.25    | 17.57    | 86.43                       | 1             | 5                  |
| 1022_1      | nonBPD       | F   | 1134             | 29         | 16.98    | 17.46    | 0.00   | 12.19      | 7.76     | 30.28    | 20.71    | 87.17                       | 1             | 3                  |
| 1023_1      | nonBPD       | M   | 1093             | 30         | 19.86    | 30.48    | 0.00   | 16.75      | 5.42     | 7.92     | 25.61    | 87.08                       | 1             | 2                  |
| 1024_1      | nonBPD       | F   | 789              | 26         | 12.79    | 8.41     | 0.00   | 13.40      | 12.15    | 22.82    | 39.74    | 81.40                       | 1             | 0                  |
| 1025_1      | nonBPD       | F   | 870              | 26         | 22.01    | 20.15    | 0.00   | 16.23      | 5.18     | 12.25    | 28.58    | 84.63                       | 1             | 0                  |
| 1026_1      | nonBPD       | F   | 1306             | 30.2       | 15.00    | 31.39    | 0.00   | 11.89      | 8.80     | 28.15    | 8.93     | 87.35                       | 1             | 0                  |
| 1027_1      | nonBPD       | M   | 1344             | 30.2       | 15.70    | 36.08    | 0.00   | 13.69      | 7.56     | 20.76    | 9.72     | 85.56                       | 1             | 0                  |
| 1028_1      | nonBPD       | M   | 850              | 28         | 5.62     | 4.89     | 0.00   | 0.25       | 0.00     | 0.00     | 96.08    | 72.21                       | 1             | 5                  |
| 1029_1      | nonBPD       | M   | 736              | 29         | 19.32    | 32.99    | 0.00   | 11.89      | 13.45    | 13.89    | 12.96    | 84.94                       | 1             | 19                 |
| 1029_2      | nonBPD       | M   | 863              | 29         | 23.17    | 29.96    | 0.00   | 12.02      | 12.09    | 12.03    | 15.64    | 85.25                       | 1             | 14                 |
| 1030_1      | nonBPD       | F   | 1453             | 30.6       | 18.67    | 15.63    | 0.00   | 16.24      | 7.56     | 22.58    | 24.29    | 84.71                       | 1             | 15                 |
| 1030_2      | nonBPD       | F   | 1221             | 30.6       | 23.42    | 28.86    | 0.00   | 17.06      | 5.35     | 18.89    | 9.90     | 84.92                       | 1             | 1                  |
| 1031_1      | nonBPD       | F   | 1100             | 31         | 4.76     | 4.34     | 0.00   | 0.00       | 1.13     | 0.00     | 95.58    | 68.51                       | 1             | 0                  |
| 1032_1      | nonBPD       | F   | 1285             | 31         | 19.82    | 27.36    | 0.00   | 21.15      | 11.04    | 16.35    | 7.80     | 87.60                       | 1             | 3                  |
| 1033_1      | nonBPD       | F   | 1353             | 32         | 15.10    | 31.92    | 0.00   | 22.99      | 8.91     | 8.18     | 17.61    | 87.07                       | 1             | 21                 |

Table S2. Distribution of cord blood cell types and methylation status of a tobacco smoke epigenetic biomarker in neonates with or without BPD

| Sample_Name | Sample_Group | Sex | Birth weight (g) | GA (weeks) | CD8T (%) | CD4T (%) | NK (%) | B cell (%) | Mono (%) | Gran (%) | NRBC (%) | *cg05575921 methylation (%) | Hospital code | Cumulative Days O2 |
|-------------|--------------|-----|------------------|------------|----------|----------|--------|------------|----------|----------|----------|-----------------------------|---------------|--------------------|
| 1034_2      | nonBPD       | M   | 1389             | 33         | 26.60    | 29.22    | 0.00   | 12.10      | 6.17     | 17.86    | 11.72    | 77.44                       | 1             | 0                  |
| 1035_1      | nonBPD       | F   | 1176             | 33         | 16.52    | 29.22    | 0.00   | 12.25      | 5.17     | 19.06    | 21.96    | 83.81                       | 1             | 5                  |
| 1038_1      | nonBPD       | M   | 1316             | 30         | 11.08    | 12.68    | 0.00   | 15.10      | 12.13    | 18.33    | 35.90    | 81.24                       | 1             | 5                  |
| 1039_1      | nonBPD       | F   | 1488             | 32         | 15.13    | 19.93    | 0.00   | 19.07      | 9.51     | 23.26    | 19.09    | 80.47                       | 1             | 6                  |
| 1040_1      | nonBPD       | F   | 1313             | 31         | 16.06    | 41.85    | 0.00   | 16.46      | 7.14     | 8.46     | 15.43    | 79.32                       | 1             | 10                 |
| 2003_1      | nonBPD       | F   | 1292             | 27.5       | 17.98    | 26.50    | 0.00   | 19.34      | 5.63     | 4.26     | 36.06    | 79.68                       | 2             | 8                  |
| 2004_1      | nonBPD       | F   | 930              | 29         | 18.78    | 18.35    | 0.00   | 22.66      | 12.08    | 13.79    | 21.86    | 83.79                       | 2             | 0                  |
| 2005_1      | nonBPD       | F   | 1397             | 30         | 31.68    | 35.61    | 0.00   | 19.99      | 1.14     | 5.42     | 13.14    | 86.34                       | 2             | 1                  |
| 2005_2      | nonBPD       | F   | 890              | 30         | 27.46    | 11.70    | 0.46   | 11.89      | 3.74     | 4.07     | 49.34    | 76.00                       | 2             | 0                  |
| 2006_1      | nonBPD       | F   | 1305             | 31         | 20.98    | 19.20    | 0.32   | 2.36       | 0.00     | 0.00     | 64.49    | 75.90                       | 2             | 0                  |
| 2008_1      | nonBPD       | F   | 986              | 32         | 16.60    | 34.42    | 0.00   | 18.34      | 3.58     | 10.47    | 21.66    | 82.09                       | 2             | 0                  |
| 2009_1      | nonBPD       | F   | 1290             | 33         | 19.06    | 39.68    | 0.00   | 14.02      | 5.24     | 18.19    | 10.12    | 85.39                       | 2             | 0                  |
| 2011_1      | nonBPD       | M   | 1400             | 28         | 10.11    | 9.41     | 0.63   | 12.52      | 15.06    | 48.60    | 11.56    | 85.69                       | 2             | 0                  |
| 2013_1      | nonBPD       | F   | 1482             | 35         | 22.76    | 20.51    | 0.00   | 10.60      | 8.06     | 32.21    | 10.75    | 85.52                       | 2             | 0                  |
| 2015_1      | nonBPD       | F   | 1266             | 31         | 13.92    | 29.89    | 0.00   | 15.90      | 5.82     | 11.11    | 28.59    | 80.81                       | 2             | 7                  |
| 2016_1      | nonBPD       | M   | 1400             | 30.5       | 15.32    | 30.07    | 0.00   | 20.31      | 9.34     | 21.28    | 9.19     | 91.22                       | 2             | 2                  |
| 2018_1      | nonBPD       | F   | 1274             | 30         | 8.61     | 17.87    | 4.42   | 7.83       | 9.59     | 33.12    | 24.85    | 87.88                       | 2             | 3                  |
| 2019_1      | nonBPD       | M   | 963              | 27         | 16.36    | 18.72    | 0.00   | 19.69      | 10.36    | 28.67    | 10.43    | 88.47                       | 2             | 23                 |
| 2020_1      | nonBPD       | M   | 1180             | 32         | 5.94     | 10.25    | 0.00   | 3.31       | 0.29     | 0.00     | 86.52    | 66.43                       | 2             | 1                  |
| 2021_1      | nonBPD       | F   | 834              | 28         | 14.75    | 25.45    | 0.00   | 21.47      | 10.80    | 13.70    | 18.30    | 85.79                       | 2             | 25                 |
| 2021_2      | nonBPD       | M   | 950              | 28         | 18.33    | 31.40    | 0.07   | 18.82      | 10.64    | 11.54    | 13.84    | 84.54                       | 2             | 28                 |
| 2022_1      | nonBPD       | M   | 1420             | 29.5       | 15.33    | 36.24    | 0.00   | 19.05      | 6.03     | 10.55    | 17.21    | 84.54                       | 2             | 0                  |
| 2022_2      | nonBPD       | M   | 1462             | 29.5       | 18.19    | 38.32    | 0.00   | 20.33      | 5.65     | 6.75     | 16.20    | 92.37                       | 2             | 4                  |
| 2023_1      | nonBPD       | M   | 1378             | 32.5       | 17.28    | 27.48    | 0.00   | 13.50      | 12.25    | 22.22    | 15.25    | 83.10                       | 2             | 0                  |
| 2024_1      | nonBPD       | F   | 601              | 29         | 9.19     | 8.06     | 0.00   | 3.19       | 0.02     | 0.00     | 83.60    | 67.29                       | 2             | 2                  |
| 2025_1      | nonBPD       | F   | 1000             | 30         | 17.16    | 19.04    | 0.00   | 17.45      | 13.22    | 24.01    | 13.96    | 79.62                       | 2             | 4                  |
| 2026_1      | nonBPD       | F   | 1258             | 29         | 13.89    | 23.48    | 0.00   | 17.72      | 6.11     | 34.33    | 8.94     | 91.04                       | 2             | 4                  |
| 2026_2      | nonBPD       | F   | 1322             | 29         | 15.44    | 25.73    | 0.00   | 19.71      | 5.97     | 17.95    | 22.16    | 88.40                       | 2             | 4                  |
| 2027_1      | nonBPD       | F   | 850              | 27         | 11.15    | 9.26     | 1.13   | 9.09       | 4.92     | 11.11    | 61.34    | 85.96                       | 2             | 10                 |
| 3001_1      | nonBPD       | M   | 860              | 30         | 25.05    | 17.94    | 0.21   | 8.24       | 2.36     | 0.29     | 55.00    | 77.48                       | 3             | 31                 |
| 3002_1      | nonBPD       | F   | 705              | 25.5       | 5.72     | 11.64    | 0.00   | 10.68      | 10.53    | 30.90    | 36.26    | 79.70                       | 3             | 46                 |
| 3003_1      | nonBPD       | M   | 1430             | 28.4       | 20.85    | 17.06    | 0.00   | 10.04      | 10.22    | 28.26    | 17.29    | 79.42                       | 3             | 17                 |
| 3004_1      | nonBPD       | F   | 1490             | 30.3       | 13.57    | 26.19    | 0.00   | 12.89      | 2.72     | 5.62     | 44.18    | 79.61                       | 3             | 7                  |
| 3005_1      | nonBPD       | F   | 1400             | 33.8       | 17.92    | 25.86    | 0.00   | 23.11      | 5.21     | 12.45    | 20.26    | 80.19                       | 3             | 0                  |
| 3006_1      | nonBPD       | M   | 1300             | 31.3       | 19.54    | 25.18    | 0.00   | 12.68      | 8.15     | 32.38    | 9.61     | 81.88                       | 3             | 0                  |
| 3007_1      | nonBPD       | M   | 1440             | 30.5       | 16.72    | 22.59    | 0.00   | 12.88      | 10.79    | 13.69    | 30.03    | 76.66                       | 3             | 3                  |
| 3008_1      | nonBPD       | M   | 1350             | 34.1       | 14.95    | 14.28    | 0.00   | 6.15       | 1.72     | 4.38     | 64.01    | 73.33                       | 3             | 1                  |
| 3009_1      | nonBPD       | F   | 1430             | 31         | 11.97    | 37.47    | 0.00   | 17.83      | 7.53     | 14.58    | 14.70    | 85.11                       | 3             | 0                  |
| 3009_3      | nonBPD       | F   | 1490             | 31         | 14.82    | 49.69    | 0.00   | 13.23      | 3.91     | 14.79    | 7.18     | 88.98                       | 3             | 0                  |
| 3010_1      | nonBPD       | F   | 1170             | 32.2       | 30.24    | 25.94    | 1.82   | 21.43      | 3.05     | 3.38     | 22.98    | 79.52                       | 3             | 5                  |
| 3010_2      | nonBPD       | F   | 1360             | 32.2       | 28.73    | 25.00    | 2.65   | 14.54      | 2.24     | 5.87     | 25.62    | 79.24                       | 3             | 0                  |
| 3011_1      | nonBPD       | F   | 890              | 29.5       | 18.03    | 22.25    | 1.14   | 14.52      | 14.29    | 24.13    | 14.52    | 83.06                       | 3             | 29                 |
| 3011_2      | nonBPD       | F   | 730              | 29.5       | 25.36    | 15.11    | 5.38   | 13.49      | 9.49     | 14.27    | 27.24    | 84.56                       | 3             | 2                  |
| 3014_1      | nonBPD       | F   | 1350             | 32.8       | 15.18    | 31.32    | 0.00   | 16.53      | 5.41     | 21.18    | 16.66    | 83.40                       | 3             | 0                  |
| 3015_1      | nonBPD       | F   | 1400             | 31         | 9.96     | 23.16    | 0.00   | 14.97      | 7.87     | 24.89    | 23.22    | 78.65                       | 3             | 6                  |

| Sample_Name | Sample_Group | Sex | Birth weight (g) | GA (weeks) | CD8T (%) | CD4T (%) | NK (%) | B cell (%) | Mono (%) | Gran (%) | NRBC (%) | *cg05575921 methylation (%) | Hospital code | Cumulative Days O2 |
|-------------|--------------|-----|------------------|------------|----------|----------|--------|------------|----------|----------|----------|-----------------------------|---------------|--------------------|
| 3016_1      | nonBPD       | M   | 1470             | 31.2       | 19.16    | 43.01    | 0.00   | 5.86       | 0.00     | 5.26     | 28.86    | 77.62                       | 3             | 0                  |
| 3018_1      | nonBPD       | M   | 1440             | 32.8       | 16.72    | 21.30    | 0.00   | 12.23      | 5.42     | 41.14    | 5.69     | 85.70                       | 3             | 0                  |
| 3019_1      | nonBPD       | F   | 1470             | 30         | 19.85    | 35.83    | 0.00   | 11.08      | 9.58     | 11.85    | 14.93    | 83.23                       | 3             | 0                  |
| 4002_1      | nonBPD       | M   | 1080             | 29         | 15.73    | 22.38    | 0.00   | 11.51      | 6.81     | 11.16    | 42.59    | 76.21                       | 4             | 37                 |
| 4003_1      | nonBPD       | F   | 1420             | 30         | 19.37    | 39.12    | 0.00   | 15.15      | 5.03     | 10.63    | 14.56    | 83.36                       | 4             | 10                 |
| 4003_2      | nonBPD       | F   | 1400             | 30         | 19.87    | 28.06    | 2.34   | 12.33      | 4.40     | 8.58     | 27.13    | 91.12                       | 4             | 10                 |
| 4006_1      | nonBPD       | M   | 1330             | 32         | 21.82    | 16.82    | 3.61   | 10.77      | 6.09     | 28.58    | 16.81    | 75.62                       | 4             | 4                  |
| 4006_2      | nonBPD       | F   | 1300             | 32         | 16.70    | 21.65    | 0.00   | 16.14      | 8.46     | 29.31    | 11.74    | 78.83                       | 4             | 3                  |
| 4007_1      | nonBPD       | M   | 1350             | 31.5       | 14.36    | 12.32    | 0.00   | 7.48       | 6.86     | 39.36    | 27.12    | 78.75                       | 4             | 0                  |
| 4008_1      | nonBPD       | M   | 1300             | 30.3       | 25.25    | 15.21    | 0.00   | 6.51       | 2.02     | 11.58    | 43.17    | 73.23                       | 4             | 0                  |
| 4009_1      | nonBPD       | M   | 980              | 30         | 9.47     | 9.26     | 3.87   | 5.38       | 4.06     | 3.54     | 71.36    | 76.59                       | 4             | 15                 |
| 4010_1      | nonBPD       | M   | 1300             | 30         | 18.48    | 33.26    | 0.00   | 10.36      | 4.47     | 5.83     | 32.87    | 68.97                       | 4             | 35                 |
| 4010_2      | nonBPD       | F   | 750              | 30         | 13.72    | 52.79    | 0.00   | 19.02      | 0.54     | 7.14     | 10.15    | 88.08                       | 4             | 20                 |
| 4011_1      | nonBPD       | M   | 970              | 28         | 13.61    | 12.10    | 0.94   | 4.86       | 4.12     | 0.32     | 71.24    | 65.83                       | 4             | 15                 |
| 4012_1      | nonBPD       | F   | 1040             | 27.1       | 13.85    | 10.07    | 0.00   | 7.58       | 12.14    | 46.35    | 15.44    | 72.95                       | 4             | 22                 |
| 4013_1      | nonBPD       | F   | 1150             | 32         | 5.61     | 4.81     | 0.00   | 1.99       | 2.21     | 1.15     | 90.76    | 64.98                       | 4             | 0                  |
| 4014_1      | nonBPD       | F   | 1250             | 29         | 32.16    | 30.83    | 0.46   | 14.85      | 3.16     | 10.06    | 17.88    | 86.24                       | 4             | 20                 |
| 4015_1      | nonBPD       | F   | 780              | 28.2       | 12.48    | 11.09    | 0.00   | 7.94       | 5.59     | 18.00    | 53.96    | 71.93                       | 4             | 22                 |

\*a tobacco smoke exposure CpG biomarker on AHRR (aryl-hydrocarbon receptor repressor)

CD8T= CD8+T cell; CD4T= CD4+ T cell; NK= natural killer cell, Mono= monocyte; Gran= granulocyte; NRBC=nucleated red blood cell.

**Table S3. Differentially methylated CpG sites associated with cord blood nucleated red blood cell (NRBC) counts.**

Illumina HumanMethylation 450 BeadChip analysis on cord blood DNA from nonBPD infants (n=93).

Bonferroni (BF) correction  $p < 1.12E-07$ . t=moderated t-statistic value

Chr=chromosome. Pos.hg19=position on Genome Reference Consortium Human Build 37 (GRCh37, hg19). dist2TSS=distance to transcription start site.

| Probe      | p_adj    | q_val    | t        | Chr | Pos.hg19 | locations                                                                           | dist2TSS | gene.Illumina             | gene.nearest |
|------------|----------|----------|----------|-----|----------|-------------------------------------------------------------------------------------|----------|---------------------------|--------------|
| cg11923627 | 2.79E-31 | 1.25E-25 | -18.3634 | 18  | 55470401 | 5'UTR                                                                               | 146      | ATP8B1                    | ATP8B1       |
| cg11067736 | 6.88E-24 | 1.54E-18 | -14.0727 | 8   | 1.01E+08 | Body;Body                                                                           | 54690    | SPAG1                     | SPAG1        |
| cg04512050 | 1.11E-23 | 1.66E-18 | -13.9599 | 6   | 31620972 | TSS1500;TSS1500;TSS1500;TSS1500;TSS1500;TSS1500;Body;Body;TSS5000                   | -495     | BAG6;APOM                 | BAG6         |
| cg06679265 | 2.11E-19 | 2.24E-14 | -11.7124 | 12  | 57040204 | TSS1500;TSS5000;TSS1500                                                             | -436     | ATP5F1B;SNORD59B;SNORD59A | ATP5F1B      |
| cg13335447 | 2.50E-19 | 2.24E-14 | -11.674  | 12  | 57853735 | TSS5000;5'UTR;TSS200;TSS200                                                         | 168      | INHBE;GLI1                | GLI1         |
| cg19317265 | 5.43E-19 | 3.82E-14 | -11.5026 | 18  | 12702832 | Body;TSS200;TSS200;TSS200;TSS1500                                                   | -56      | PSMG2;CEP76               | CEP76        |
| cg13687825 | 5.98E-19 | 3.82E-14 | -11.4809 | 8   | 1.01E+08 | Body;Body                                                                           | 54782    | SPAG1                     | SPAG1        |
| cg15021640 | 4.11E-18 | 2.05E-13 | 11.05682 | 22  | 49697802 |                                                                                     | 239312   |                           | MIR3667      |
| cg13380511 | 4.99E-18 | 2.05E-13 | -11.0145 | 11  | 65837996 | TSS5000;1stExon                                                                     | 254      | SF3B2;PACS1               | PACS1        |
| cg10763598 | 5.35E-18 | 2.05E-13 | -10.9992 | 19  | 19431466 | TSS200;TSS200                                                                       | -148     | SUGP1;MAU2                | SUGP1        |
| cg08271318 | 5.46E-18 | 2.05E-13 | -10.9947 | 19  | 44809193 | TSS200                                                                              | -15      | ZNF235                    | ZNF235       |
| cg07295974 | 5.49E-18 | 2.05E-13 | -10.9936 | 16  | 85045150 | TSS200;TSS200                                                                       | -9       | ZDHHC7                    | ZDHHC7       |
| cg08917174 | 1.48E-17 | 5.08E-13 | -10.7771 | 2   | 2.17E+08 | 5'UTR                                                                               | 556      | MARCHF4                   | MARCHF4      |
| cg10970776 | 2.16E-17 | 6.90E-13 | -10.6943 | 11  | 61100608 | TSS200;TSS200;TSS200;TSS200;TSS200;TSS200;TSS200                                    | -31      | DDB1;TKFC                 | DDB1         |
| cg15653194 | 4.23E-17 | 1.26E-12 | -10.5479 | 7   | 2559473  | Body;Body;5'UTR;5'UTR                                                               | 66       | LFNG                      | LFNG         |
| cg22604213 | 5.58E-17 | 1.56E-12 | -10.4878 | 4   | 1.05E+08 | 1stExon;Body;Body                                                                   | 679      | CXXC4;CXXC4-AS1           | CXXC4-AS1    |
| cg22939524 | 1.38E-16 | 3.64E-12 | 10.29086 | 7   | 1.39E+08 | Body;Body                                                                           | -69812   | KIAA1549                  | ATP6V0A4     |
| cg12837896 | 2.77E-16 | 6.59E-12 | -10.1409 | 17  | 21415289 |                                                                                     | 39652    |                           | LINC02693    |
| cg26400491 | 2.80E-16 | 6.59E-12 | 10.13826 | 8   | 1.45E+08 | Body;Body;TSS5000                                                                   | 3297     | SCRIB;MIR937              | MIR937       |
| cg10203375 | 3.37E-16 | 7.54E-12 | -10.0981 | 1   | 2.11E+08 | Body;Body;TSS1500                                                                   | 312      | KCNH1;KCNH1-IT1           | KCNH1        |
| cg26808979 | 5.70E-16 | 1.21E-11 | -9.98467 | 11  | 16759946 | Body;TSS1500                                                                        | 78       | SOX6;C11orf58             | SOX6         |
| cg27500918 | 1.03E-15 | 2.10E-11 | -9.85632 | 16  | 2933308  | Body;5'UTR;5'UTR                                                                    | 93       | FLYWCH2                   | FLYWCH2      |
| cg13600149 | 1.94E-15 | 3.77E-11 | 10.49424 | 9   | 98079129 | Body;Body;Body                                                                      | 407      | FANCC                     | FANCC        |
| cg01926858 | 2.25E-15 | 4.19E-11 | -9.68893 | 14  | 53619558 | 1stExon;1stExon;1stExon;TSS1500                                                     | 483      | DDHD1;LOC101927620        | DDHD1        |
| cg27013478 | 5.02E-15 | 8.78E-11 | -9.51591 | 16  | 2961939  | TSS200;TSS200;TSS200                                                                | -40      | FLYWCH1                   | FLYWCH1      |
| cg07091346 | 5.11E-15 | 8.78E-11 | 9.512194 | 11  | 888685   | Body;Body;Body;Body;Body                                                            | 22125    | CHID1                     | CHID1        |
| cg11869233 | 5.39E-15 | 8.92E-11 | -9.50073 | 2   | 48009809 | TSS1500;TSS1500;TSS1500;TSS1500                                                     | -411     | MSH6                      | MSH6         |
| cg00490450 | 6.43E-15 | 9.74E-11 | -9.46257 | 3   | 1.39E+08 | TSS200;TSS200;Body;Body                                                             | 37       | COPB2;LOC100507291        | LOC100507291 |
| cg11791427 | 6.47E-15 | 9.74E-11 | -9.46139 | 7   | 73704194 | Body;Body                                                                           | 458      | CLIP2                     | CLIP2        |
| cg06421238 | 6.54E-15 | 9.74E-11 | 9.459116 | 17  | 5993785  | Body                                                                                | 19852    | WSCD1                     | WSCD1        |
| cg26712763 | 7.51E-15 | 1.08E-10 | -9.42928 | 17  | 21030248 | 5'UTR                                                                               | 8        | DHRS7B                    | DHRS7B       |
| cg06782035 | 7.70E-15 | 1.08E-10 | -9.42384 | 5   | 16179135 | Body;TSS1500                                                                        | 765      | MARCHF11;LOC401176        | MARCHF11     |
| cg13682223 | 8.18E-15 | 1.11E-10 | -9.41087 | 3   | 50336418 | TSS200;Body;Body;Body;Body;TSS200;Body;Body;TSS5000;TSS5000;TSS5000;TSS5000;TSS5000 | -127     | HYAL3;NAA80;HYAL1         | NAA80        |
| cg04724176 | 9.24E-15 | 1.21E-10 | 9.384757 | 2   | 1.29E+08 |                                                                                     | 110809   |                           | HS6ST1       |
| cg23118188 | 9.55E-15 | 1.22E-10 | 9.377578 | 11  | 1.34E+08 |                                                                                     | -26840   |                           | IGSF9B       |
| cg16588967 | 1.25E-14 | 1.54E-10 | 9.319656 | 6   | 43128935 | 3'UTR;3'UTR;3'UTR;3'UTR;Body;Body;3'UTR                                             | -10071   | PTK7                      | SRF          |
| cg19529957 | 1.27E-14 | 1.54E-10 | 9.315533 | 7   | 4198590  | Body;Body                                                                           | -24121   | SDK1                      | LOC105375131 |
| cg13348574 | 1.33E-14 | 1.56E-10 | 9.306762 | 17  | 207478   | TSS5000;TSS5000;TSS5000;TSS5000                                                     | -4845    | RPH3AL                    | RPH3AL       |
| cg13175480 | 1.56E-14 | 1.79E-10 | -9.2724  | 15  | 83680325 | 1stExon;1stExon;1stExon;1stExon;Body;1stExon;Body;TSS5000;TSS5000                   | 66       | C15orf40;BTBD1            | C15orf40     |
| cg09112623 | 1.74E-14 | 1.94E-10 | -9.24891 | 6   | 33756905 | TSS5000;5'UTR;5'UTR;5'UTR                                                           | 2        | LEMD2                     | LEMD2        |
| cg12451869 | 3.08E-14 | 3.36E-10 | -9.12624 | 2   | 1.03E+08 |                                                                                     | -60276   |                           | IL1RL1       |
| cg05370752 | 5.38E-14 | 5.73E-10 | 9.005991 | 21  | 40756954 | Body;Body;Body;Body;Body;Body;Body;Body;Body;Body;TSS5000;TSS5000                   | -2734    | GET1;WRB-SH3BGR           | GET1         |
| cg07023902 | 5.75E-14 | 5.98E-10 | -8.99193 | 2   | 74682183 | Body;TSS200;TSS5000                                                                 | -30      | INO80B-WBP1;INO80B;WBP1   | INO80B       |
| cg09201264 | 6.27E-14 | 6.28E-10 | 8.973439 | 20  | 3748382  | Body;5'UTR;5'UTR;5'UTR                                                              | 18       | C20orf27                  | C20orf27     |
| cg02103891 | 6.40E-14 | 6.28E-10 | 8.968996 | 5   | 1.72E+08 | Body;Body                                                                           | 56808    | SH3PXD2B                  | LOC100288254 |
| cg22160662 | 6.46E-14 | 6.28E-10 | 8.966943 | 3   | 66908896 |                                                                                     | -120136  |                           | LOC105377143 |
| cg03634947 | 6.68E-14 | 6.36E-10 | 8.959698 | 20  | 33547679 | TSS5000;TSS5000;TSS5000;Body                                                        | -3849    | GSS;MYH7B                 | GSS          |
| cg12057156 | 7.23E-14 | 6.73E-10 | 8.942787 | 7   | 162052   |                                                                                     | 12335    |                           | LOC100507642 |
| cg17798633 | 7.63E-14 | 6.96E-10 | 8.931109 | 17  | 19363769 |                                                                                     | 49225    |                           | RNF112       |
| cg05295584 | 8.61E-14 | 7.70E-10 | 8.905187 | 1   | 1.09E+08 | TSS200;Body;TSS200;TSS200                                                           | -18      | AKNAD1;SPATA42            | AKNAD1       |
| cg16565692 | 9.50E-14 | 8.33E-10 | 8.884121 | 5   | 1.31E+08 | TSS1500                                                                             | -1360    | CSF2                      | CSF2         |
| cg04798574 | 9.99E-14 | 8.59E-10 | -8.87321 | 3   | 1.49E+08 | TSS200;TSS200                                                                       | -129     | HPS3                      | HPS3         |
| cg01257309 | 1.32E-13 | 1.12E-09 | 8.812985 | 13  | 51418614 | TSS1500;Body;TSS1500                                                                | -539     | DLEU7;DLEU7-AS1           | DLEU7        |
| cg00503298 | 1.51E-13 | 1.25E-09 | 8.784307 | 1   | 47263713 | TSS1500;TSS1500;TSS1500;TSS1500;TSS1500;TSS1500                                     | -1004    | CYP4B1                    | CYP4B1       |
| cg15854394 | 1.75E-13 | 1.42E-09 | 8.752952 | 8   | 22769830 | Body;Body                                                                           | 15597    | PEBP4                     | PEBP4        |
| cg21544437 | 2.31E-13 | 1.85E-09 | -8.69267 | 2   | 1.14E+08 | TSS5000                                                                             | 4219     | FOXDL1                    | FOXDL1       |

Table S3. Differentially methylated CpG sites associated with NRBC counts

| Probe      | p_adj    | q_val    | t        | Chr | Pos.hg19 | locations                                                                                   | dist2TSS | gene.Illumina              | gene.nearest |
|------------|----------|----------|----------|-----|----------|---------------------------------------------------------------------------------------------|----------|----------------------------|--------------|
| cg14192081 | 3.05E-13 | 2.36E-09 | 8.63337  | 14  | 62519784 | Body;Body;Body;Body;Body;Body;Body                                                          | -64290   | SYT16                      | LINC00643    |
| cg17457701 | 3.06E-13 | 2.36E-09 | 8.632431 | 15  | 86313860 | Body;TSS200                                                                                 | -51      | KLHL25;MIR1276             | MIR1276      |
| cg04066147 | 3.43E-13 | 2.60E-09 | 8.608003 | 7   | 77854601 | Body;Body                                                                                   | -121957  | MAGI2                      | RPL13AP17    |
| cg23152572 | 3.57E-13 | 2.65E-09 | 8.599635 | 10  | 13328293 | Body;Body;Body;Body;Body;Body                                                               | 13453    | PHYH                       | PHYH         |
| cg13407144 | 3.62E-13 | 2.65E-09 | 8.596615 | 10  | 33468337 | 3'UTR;3'UTR;3'UTR;Body;3'UTR                                                                | -62602   | NRP1                       | IATPR        |
| cg19170021 | 4.00E-13 | 2.88E-09 | 8.575321 | 17  | 79077169 | Body;Body;Body;Body                                                                         | 22004    | BAIAP2                     | MIR657       |
| cg17144164 | 4.39E-13 | 3.10E-09 | 8.55497  | 17  | 78896700 | Body;Body                                                                                   | 48313    | RPTOR                      | LOC400627    |
| cg25717351 | 4.44E-13 | 3.10E-09 | 8.552526 | 17  | 744675   | Body;Body                                                                                   | 22676    | NXN                        | NXN          |
| cg09190824 | 5.30E-13 | 3.62E-09 | 8.51439  | 4   | 77662419 | Body                                                                                        | 156878   | SHROOM3                    | SOWAHB       |
| cg18043280 | 5.35E-13 | 3.62E-09 | 8.512628 | 17  | 40996886 | TESS5000;TESS5000;TESS5000;TESS5000;1stExon;1stExon                                         | 290      | PSME3;AOC2                 | AOC2         |
| cg10012920 | 6.12E-13 | 4.09E-09 | 8.483584 | 11  | 1.23E+08 |                                                                                             | -6598    |                            | GRAMD1B      |
| cg00678709 | 6.41E-13 | 4.21E-09 | 8.473707 | 3   | 14584745 | TSS5000                                                                                     | -2896    | GRIP2                      | GRIP2        |
| cg11492063 | 7.57E-13 | 4.90E-09 | 8.437968 | 17  | 5990345  | Body                                                                                        | 16412    | WSCD1                      | WSCD1        |
| cg05592114 | 8.89E-13 | 5.68E-09 | 8.403236 | 12  | 7244104  | Body;Body;TESS5000;TESS5000;TESS5000                                                        | 385      | C1R;C1RL                   | C1R          |
| cg11978634 | 9.06E-13 | 5.70E-09 | 8.399293 | 13  | 43971194 | Body;Body;Body;Body;Body;Body;Body;Body;Body;Body                                           | -51793   | ENOX1                      | ENOX1-AS2    |
| cg17250993 | 1.00E-12 | 6.22E-09 | 8.377643 | 4   | 24958390 | Body                                                                                        | 23436    | CCDC149                    | CCDC149      |
| cg11942622 | 1.11E-12 | 6.81E-09 | 8.355168 | 15  | 79298659 | TSS1500;Body;Body                                                                           | -657     | RASGRF1                    | RASGRF1      |
| cg12789935 | 1.19E-12 | 7.17E-09 | 8.341264 | 2   | 2.42E+08 | TSS1500;TSS1500;Body                                                                        | -573     | MAB21L4                    | MAB21L4      |
| cg25329415 | 1.40E-12 | 8.29E-09 | 8.305402 | 6   | 28076851 |                                                                                             | -15482   |                            | ZSCAN16      |
| cg26062048 | 1.41E-12 | 8.29E-09 | -8.30405 | 5   | 1.53E+08 | 5'UTR;Body;Body;Body;TSS200;TSS200;TSS200                                                   | 58       | FAM114A2;MFAP3             | FAM114A2     |
| cg16432441 | 1.56E-12 | 9.07E-09 | 8.281934 | 10  | 72531006 | 3'UTR;3'UTR;3'UTR;3'UTR;Body;Body;Body;Body                                                 | 11323    | TBATA                      | TBATA        |
| cg16944964 | 1.75E-12 | 1.01E-08 | -8.25691 | 2   | 2.28E+08 | TSS1500;Body;Body;Body;Body;Body;Body;Body;TSS5000;TSS5000;TSS5000                          | 386      | MFF-DT;MFF                 | MFF          |
| cg05877280 | 1.82E-12 | 1.03E-08 | 8.248907 | 15  | 76475969 | Body;TSS5000                                                                                | -2142    | TMEM266;LOC101929439       | LOC101929439 |
| cg15386350 | 2.02E-12 | 1.13E-08 | 8.226686 | 1   | 11591766 | Body                                                                                        | 52555    | DISP3                      | DISP3        |
| cg00146249 | 2.10E-12 | 1.16E-08 | 8.217571 | 17  | 79042364 | Body;Body;Body;Body                                                                         | 33414    | BAIAP2                     | BAIAP2       |
| cg04735960 | 2.15E-12 | 1.17E-08 | 8.21296  | 13  | 21006388 | Body;Body;TESS5000                                                                          | 1597     | CRYL1;MIR4499              | MIR4499      |
| cg27078600 | 2.28E-12 | 1.23E-08 | 8.200053 | 6   | 1.68E+08 | TSS5000;1stExon;Body                                                                        | 270      | FRMD1                      | FRMD1        |
| cg08447380 | 2.37E-12 | 1.26E-08 | 8.192101 | 8   | 8185703  | Body;Body;Body                                                                              | 58051    | PRAG1                      | PRAG1        |
| cg14994521 | 2.40E-12 | 1.26E-08 | 8.189131 | 4   | 1.89E+08 |                                                                                             | 97428    |                            | TRIML1       |
| cg18745239 | 2.43E-12 | 1.27E-08 | 8.186154 | 10  | 44064597 | TSS1500;Body;Body;Body;Body;Body;Body;Body;Body;Body;Body                                   | -690     | ZNF239                     | ZNF239       |
| cg04687371 | 2.53E-12 | 1.30E-08 | 8.177971 | 8   | 1916285  | TESS5000;TESS5000;TSS5000                                                                   | -3277    | LOC101928058;KBTBD11-OT1   | KBTBD11-OT1  |
| cg22474130 | 2.58E-12 | 1.31E-08 | 8.173503 | 6   | 32017048 | Body;Body;TSS5000                                                                           | -3143    | TNXB                       | TNXB         |
| cg24154024 | 2.63E-12 | 1.32E-08 | 8.169386 | 1   | 2.29E+08 | TESS5000;Body;Body                                                                          | 34409    | OBSCN                      | MIR6742      |
| cg16431233 | 2.77E-12 | 1.36E-08 | 8.158316 | 17  | 61518244 | TSS1500;TSS200;Body;Body                                                                    | -56      | CYB561                     | CYB561       |
| cg22556768 | 2.78E-12 | 1.36E-08 | 8.157594 | 5   | 66586585 |                                                                                             | -93958   |                            | CD180        |
| cg06373804 | 2.80E-12 | 1.36E-08 | 8.155687 | 2   | 2.43E+08 | Body                                                                                        | -24500   | LINC01237                  | LINC01238    |
| cg26683025 | 3.11E-12 | 1.50E-08 | 8.133056 | 11  | 65560420 | Body;TSS5000                                                                                | -2081    | OVOL1;OVOL1-AS1            | OVOL1-AS1    |
| cg01287788 | 3.25E-12 | 1.54E-08 | 8.124172 | 2   | 86362935 | Body;TSS200                                                                                 | -57      | PTCD3;SNORD94              | SNORD94      |
| cg01301117 | 3.34E-12 | 1.57E-08 | 8.117686 | 7   | 1953969  | Body;Body;Body;Body;Body;Body                                                               | 26238    | MAD1L1                     | MAD1L1       |
| cg21915765 | 3.44E-12 | 1.60E-08 | -8.11141 | 19  | 18682480 | TESS5000;TESS5000;TESS5000;TSS200;TSS200;TSS200;TSS200;TSS200;TSS200;TSS1500                | -59      | KXD1;UBA52                 | UBA52        |
| cg15570395 | 3.88E-12 | 1.79E-08 | 8.085826 | 4   | 1.85E+08 | Body                                                                                        | 9978     | ENPP6                      | ENPP6        |
| cg03033447 | 4.08E-12 | 1.86E-08 | 8.07495  | 1   | 2.28E+08 | Body;Body;Body                                                                              | -72339   | OBSCN                      | OBSCN-AS1    |
| cg19294448 | 4.47E-12 | 2.02E-08 | 8.054992 | 17  | 6900799  | Body;Body                                                                                   | 1432     | ALOX12-AS1;ALOX12          | ALOX12       |
| cg12647283 | 4.66E-12 | 2.09E-08 | 8.045908 | 10  | 1.27E+08 | Body;Body;Body;Body;Body;Body                                                               | 55950    | CTBP2                      | CTBP2        |
| cg02485348 | 5.08E-12 | 2.25E-08 | 8.02743  | 1   | 2.45E+08 |                                                                                             | 73787    |                            | DES12        |
| cg02725290 | 5.60E-12 | 2.43E-08 | -8.01964 | 6   | 10837710 | Body;Body;Body                                                                              | 1062     | MAK                        | MAK          |
| cg05235171 | 5.61E-12 | 2.43E-08 | 8.006088 | 11  | 1.18E+08 | TSS1500;Body;Body;Body;Body;Body;Body                                                       | -426     | SMIM35;TMPRSS4             | SMIM35       |
| cg06799163 | 5.76E-12 | 2.48E-08 | 8.000067 | 5   | 1.38E+08 | TSS5000;TSS5000;TSS5000;Body;TSS5000;TSS5000;Body;Body;Body;TSS5000;TSS5000;TSS5000;TSS5000 | 2570     | CDC25C;LOC100128966;FAM53C | LOC100128966 |
| cg03283048 | 6.07E-12 | 2.59E-08 | -7.98876 | 16  | 2933047  | TSS200;TSS200;TSS200                                                                        | -148     | FLYWCH2                    | FLYWCH2      |
| cg17257469 | 6.56E-12 | 2.77E-08 | 7.972138 | 7   | 1.38E+08 | Body;Body;Body                                                                              | 13900    | AKR1D1                     | AKR1D1       |
| cg16465129 | 6.75E-12 | 2.82E-08 | 7.965829 | 5   | 1.31E+08 | TSS1500                                                                                     | -1332    | CSF2                       | CSF2         |
| cg01782709 | 6.99E-12 | 2.89E-08 | 7.958516 | 6   | 32918306 | Body                                                                                        | 2568     | HLA-DMA                    | HLA-DMA      |
| cg19826045 | 7.04E-12 | 2.89E-08 | 7.95694  | 17  | 61561602 | Body;TSS1500;TSS1500                                                                        | -604     | ACE                        | ACE          |
| cg16097532 | 7.91E-12 | 3.22E-08 | 7.931596 | 14  | 1.05E+08 | Body;Body                                                                                   | 20678    | AHNAK2                     | AHNAK2       |
| cg24768137 | 8.02E-12 | 3.22E-08 | 7.928684 | 2   | 2.43E+08 |                                                                                             | 24028    |                            | NEU4         |
| cg26014570 | 8.05E-12 | 3.22E-08 | 7.927744 | 12  | 1.07E+08 | TSS5000                                                                                     | -2340    | NUAK1                      | NUAK1        |
| cg04605084 | 8.54E-12 | 3.35E-08 | -7.91499 | 1   | 91487590 | TSS1500;5'UTR;5'UTR                                                                         | 2        | ZNF644                     | ZNF644       |
| cg26360004 | 8.59E-12 | 3.35E-08 | 7.913721 | 1   | 9376755  | Body                                                                                        | 23803    | SPSB1                      | SPSB1        |
| cg14645926 | 8.62E-12 | 3.35E-08 | 7.912886 | 8   | 1.04E+08 | TSS5000;TSS5000;TSS5000;TSS5000;Body;Body;Body;Body                                         | 4473     | LOC105369147;FZD6          | FZD6         |
| cg22084460 | 8.84E-12 | 3.37E-08 | 7.907556 | 19  | 13348050 | Body;Body;Body;Body;Body                                                                    | 86826    | CACNA1A                    | IER2         |



| Probe      | p_adj    | q_val    | t        | Chr | Pos.hg19 | locations                                                                       | dist2TSS | gene.Illumina                        | gene.nearest |
|------------|----------|----------|----------|-----|----------|---------------------------------------------------------------------------------|----------|--------------------------------------|--------------|
| cg06205922 | 3.84E-11 | 9.70E-08 | 7.588962 | 1   | 1473141  | TESS000;TESS000;TESS000;Body;TESS000                                            | 2863     | ATAD3A;TMEM240;SSU72                 | TMEM240      |
| cg00231754 | 3.84E-11 | 9.70E-08 | 7.58885  | 2   | 38176859 | Body;Body;Body;Body;TESS000;TSS1500;TSS1500                                     | -727     | RMDN2;RMDN2-AS1                      | RMDN2        |
| cg26463800 | 3.92E-11 | 9.85E-08 | 7.584224 | 17  | 72300792 | Body;Body;Body;Body                                                             | -21572   | DNAI2                                | KIF19        |
| cg02472906 | 3.99E-11 | 9.98E-08 | 7.58016  | 16  | 87938341 | Body;Body;Body;Body                                                             | 31794    | CA5A                                 | CA5A         |
| cg01009920 | 4.21E-11 | 1.05E-07 | 7.568725 | 8   | 8153650  |                                                                                 | 67559    |                                      | FAM86B3P     |
| cg16452248 | 4.24E-11 | 1.05E-07 | 7.566963 | 16  | 613526   | 1stExon;TSS000;TSS000                                                           | 3133     | PRR35;NHLRC4                         | PRR35        |
| cg09695261 | 4.28E-11 | 1.05E-07 | 7.565215 | 17  | 79304600 |                                                                                 | -21552   |                                      | LINC00482    |
| cg08858220 | 4.30E-11 | 1.05E-07 | 7.563867 | 6   | 36805317 | Body;Body                                                                       | 1903     | CPNE5                                | CPNE5        |
| cg02250259 | 4.34E-11 | 1.06E-07 | 7.56196  | 7   | 27273366 |                                                                                 | -9054    |                                      | EVX1         |
| cg20943723 | 4.43E-11 | 1.07E-07 | 7.557743 | 3   | 1.55E+08 | Body;Body                                                                       | -9327    | PLCH1                                | PLCH1        |
| cg23580024 | 4.48E-11 | 1.08E-07 | 7.555307 | 10  | 93811989 | Body;Body                                                                       | 128463   | CPEB3                                | BTAF1        |
| cg08137852 | 4.53E-11 | 1.08E-07 | 7.552805 | 11  | 1856025  | Body;Body;Body;Body;TSS000;TSS000                                               | 369      | SYT8;TNNI2                           | SYT8         |
| cg24860020 | 4.60E-11 | 1.09E-07 | 7.549257 | 8   | 1.23E+08 |                                                                                 | -135860  |                                      | HAS2-AS1     |
| cg15889768 | 4.63E-11 | 1.10E-07 | 7.547976 | 17  | 42619247 |                                                                                 | -15604   |                                      | FZD2         |
| cg19033943 | 4.99E-11 | 1.17E-07 | 7.531787 | 7   | 1140782  | Body;Body;Body;Body;Body                                                        | 13034    | C7orf50                              | GPB1         |
| cg00437011 | 5.13E-11 | 1.20E-07 | 7.525647 | 6   | 1.71E+08 | Body                                                                            | 5571     | LOC154449                            | LOC154449    |
| cg13131263 | 5.16E-11 | 1.20E-07 | 7.524312 | 1   | 9324393  | Body;Body                                                                       | 24488    | H6PD                                 | H6PD         |
| cg07131274 | 5.17E-11 | 1.20E-07 | 7.523813 | 2   | 3270259  | Body;Body;Body                                                                  | 111330   | EIPR1                                | EIPR1        |
| cg02340615 | 5.48E-11 | 1.26E-07 | 7.511377 | 12  | 1.05E+08 | Body                                                                            | 7502     | TXNRD1                               | TXNRD1       |
| cg09144398 | 5.57E-11 | 1.28E-07 | 7.507659 | 11  | 1.19E+08 | TSS200;TSS200                                                                   | -126     | TREH                                 | TREH         |
| cg08389497 | 5.87E-11 | 1.34E-07 | 7.496231 | 10  | 73820491 | 3'UTR;3'UTR                                                                     | 27818    | SPOCK2                               | SPOCK2       |
| cg13726814 | 5.92E-11 | 1.34E-07 | 7.49429  | 2   | 1.2E+08  | Body;TSS000;TSS000                                                              | -3347    | SCTR;LOC107105282                    | LOC107105282 |
| cg08492875 | 5.98E-11 | 1.35E-07 | 7.491989 | 2   | 1.35E+08 | Body;Body                                                                       | 194429   | MGAT5                                | MGAT5        |
| cg11614093 | 6.03E-11 | 1.35E-07 | 7.490461 | 6   | 1.55E+08 |                                                                                 | -5124    |                                      | TIAM2        |
| cg19951269 | 6.10E-11 | 1.36E-07 | 7.487753 | 11  | 94783903 |                                                                                 | -16137   |                                      | SRSF8        |
| cg16764236 | 6.41E-11 | 1.43E-07 | 7.477052 | 17  | 32611290 | TSS1500                                                                         | -1470    | CCL11                                | CCL11        |
| cg07905199 | 6.52E-11 | 1.44E-07 | 7.473332 | 17  | 67507798 | Body;Body                                                                       | 9396     | MAP2K6                               | MAP2K6       |
| cg12044293 | 6.57E-11 | 1.45E-07 | 7.471598 | 17  | 78896669 | Body;Body                                                                       | 48344    | RPTOR                                | LOC400627    |
| cg16233472 | 6.65E-11 | 1.45E-07 | 7.468944 | 11  | 65562093 | Body;TSS000                                                                     | -3754    | OVOL1;OVOL1-AS1                      | OVOL1-AS1    |
| cg06187344 | 6.66E-11 | 1.45E-07 | 7.468699 | 10  | 3151576  | Body;Body;Body;Body;Body;Body;Body;Body;Body;Body                               | 4776     | PFKP                                 | PFKP         |
| cg16841189 | 6.70E-11 | 1.46E-07 | 7.467168 | 8   | 1799411  | Body;Body;Body                                                                  | 27320    | ARHGEF10                             | ARHGEF10     |
| cg27604721 | 6.95E-11 | 1.50E-07 | 7.459221 | 11  | 2722258  | Body;Body;TSS1500                                                               | -1030    | KCNQ1;KCNQ10T1                       | KCNQ10T1     |
| cg13802527 | 7.01E-11 | 1.51E-07 | 7.457356 | 9   | 1.15E+08 | TSS1500;TSS1500;TSS1500;TSS1500;TSS1500;TSS1500;TSS1500;TSS1500;TSS1500;TSS1500 | -642     | INIP                                 | INIP         |
| cg12082793 | 7.04E-11 | 1.51E-07 | 7.456481 | 1   | 20218923 | Body                                                                            | 10036    | OTUD3                                | OTUD3        |
| cg14330078 | 7.11E-11 | 1.52E-07 | 7.454213 | 3   | 1.88E+08 | Body;TSS200                                                                     | -199     | LPP                                  | LPP          |
| cg12850636 | 7.15E-11 | 1.52E-07 | 7.453205 | 19  | 3727602  | Body;Body                                                                       | 5868     | TJP3                                 | TJP3         |
| cg02891082 | 7.29E-11 | 1.54E-07 | 7.448939 | 11  | 68118671 | Body;Body                                                                       | 38613    | LRP5                                 | LRP5         |
| cg27092975 | 7.46E-11 | 1.57E-07 | 7.443812 | 11  | 70805455 | Body                                                                            | -86982   | SHANK2                               | MIR3664      |
| cg16374972 | 7.49E-11 | 1.57E-07 | 7.442996 | 21  | 44811965 |                                                                                 | -29736   |                                      | LINC01679    |
| cg21491340 | 7.62E-11 | 1.58E-07 | 7.439223 | 19  | 18092572 | Body                                                                            | -19360   | KCNN1                                | ARRDC2       |
| cg22332100 | 7.65E-11 | 1.58E-07 | 7.438463 | 1   | 2000508  | Body;TSS000;TSS000;TSS000;TSS000;TSS000;TSS000;TSS000                           | -4392    | PRKCZ                                | PRKCZ        |
| cg00904483 | 7.84E-11 | 1.62E-07 | 7.433098 | 10  | 1.31E+08 | Body                                                                            | 89369    | MGMT                                 | MGMT         |
| cg11219178 | 8.27E-11 | 1.69E-07 | 7.421265 | 11  | 3120949  | Body;Body;Body                                                                  | -42296   | OSBPL5                               | CARS1        |
| cg20432475 | 8.27E-11 | 1.69E-07 | 7.42124  | 1   | 15763737 | TSS1500                                                                         | -1201    | CTRC                                 | CTRC         |
| cg26932889 | 8.45E-11 | 1.72E-07 | 7.416618 | 1   | 54135470 | Body;Body                                                                       | 64407    | GLIS1                                | GLIS1        |
| cg13960678 | 8.56E-11 | 1.73E-07 | 7.413867 | 3   | 1.22E+08 | Body;Body                                                                       | -63346   | CASR                                 | CSTA         |
| cg26337259 | 8.57E-11 | 1.73E-07 | 7.413627 | 17  | 62770948 | Body;TESS000                                                                    | -5928    | ARHGAP27P1-BPTFP1-KPNA2P3;ARHGAP27P1 | MIR6080      |
| cg02605387 | 8.64E-11 | 1.73E-07 | 7.411804 | 6   | 32062252 | Body;Body                                                                       | 14863    | TNXB                                 | TNXB         |
| cg10510707 | 8.67E-11 | 1.73E-07 | 7.41111  | 7   | 563858   | TSS000;TSS000;Body                                                              | 3831     | PDGFA;HRAT92                         | HRAT92       |
| cg01131289 | 8.77E-11 | 1.74E-07 | 7.408507 | 22  | 25755786 | Body;Body                                                                       | 2738     | LRP5L                                | LRP5L        |
| cg19827089 | 8.81E-11 | 1.74E-07 | 7.407524 | 4   | 1.44E+08 | TSS000;TSS000                                                                   | -3276    | GAB1                                 | GAB1         |
| cg07831351 | 8.87E-11 | 1.75E-07 | -7.40596 | 20  | 3229402  | TESS000                                                                         | -9566    | C20orf194                            | SLC4A11      |
| cg11454547 | 8.91E-11 | 1.75E-07 | 7.405043 | 2   | 11293378 | TESS000;TESS000;TESS000;TSS000;TSS000;TSS000;TSS000;TSS000                      | -2119    | C2orf50;SLC66A3                      | SLC66A3      |
| cg07232063 | 9.01E-11 | 1.76E-07 | 7.4025   | 1   | 86953050 | Body                                                                            | 18441    | CLCA1                                | CLCA1        |
| cg09774179 | 9.15E-11 | 1.77E-07 | 7.399257 | 6   | 36652043 | Body;1stExon;1stExon;1stExon;1stExon                                            | 5553     | CDKN1A                               | CDKN1A       |
| cg03585419 | 9.16E-11 | 1.77E-07 | -7.39901 | 19  | 54369681 | Body;Body;Body;TSS1500;TSS1500;TSS1500;TSS1500;TSS000;TSS000;TSS000;TSS000      | 57       | MYADM                                | MYADM        |
| cg24429708 | 9.16E-11 | 1.77E-07 | 7.398967 | 10  | 640061   | Body                                                                            | -34442   | DIP2C                                | LOC101930421 |
| cg03205258 | 9.21E-11 | 1.77E-07 | -7.39782 | 22  | 19929274 | TSS000;1stExon;1stExon;Body;1stExon;TSS200;TSS200                               | -20      | TXNRD2;COMT                          | COMT         |
| cg20567067 | 9.54E-11 | 1.82E-07 | 7.390071 | 11  | 72394353 | TESS000;TESS000;TESS000;TESS000                                                 | -8887    | ARAP1                                | PDE2A        |

| Probe      | p_adj    | q_val    | t        | Chr | Pos.hg19 | locations                                                                       | dist2TSS | gene.Illumina            | gene.nearest |
|------------|----------|----------|----------|-----|----------|---------------------------------------------------------------------------------|----------|--------------------------|--------------|
| cg15895782 | 1.00E-10 | 1.91E-07 | 7.379405 | 1   | 2.15E+08 | Body                                                                            | 74720    | PTPN14                   | PTPN14       |
| cg00545229 | 1.03E-10 | 1.96E-07 | 7.37291  | 4   | 15429531 | Body;Body;Body;TSS200                                                           | 7        | C1QTNF7-AS1;C1QTNF7      | C1QTNF7-AS1  |
| cg02957094 | 1.05E-10 | 1.97E-07 | 7.369963 | 1   | 1.78E+08 |                                                                                 | -12527   |                          | CRYZL2P      |
| cg09235385 | 1.05E-10 | 1.97E-07 | 7.368944 | 13  | 1.15E+08 | Body;Body;Body                                                                  | 17979    | RASA3                    | RASA3        |
| cg07150777 | 1.07E-10 | 2.00E-07 | 7.365587 | 2   | 2.4E+08  | Body                                                                            | -5643    | HDAC4                    | MIR4440      |
| cg23046231 | 1.08E-10 | 2.01E-07 | 7.363698 | 2   | 2.01E+08 | Body;Body;Body;Body;Body;Body                                                   | 32209    | SPATS2L                  | KCTD18       |
| cg10503473 | 1.08E-10 | 2.01E-07 | 7.362523 | 16  | 67290849 | Body;Body;Body;Body;Body;Body;Body;Body;Body                                    | 7968     | SLC9A5                   | SLC9A5       |
| cg07036035 | 1.13E-10 | 2.09E-07 | 7.353288 | 14  | 96133072 | Body;Body                                                                       | 14639    | TCL6                     | TCL6         |
| cg22218588 | 1.15E-10 | 2.12E-07 | 7.349251 | 6   | 1.56E+08 | Body;Body;TSS5000                                                               | 9994     | TIAM2;TFB1M              | TIAM2        |
| cg02712545 | 1.16E-10 | 2.12E-07 | 7.347637 | 15  | 99398084 | Body;Body                                                                       | 70430    | IGF1R                    | MIR4714      |
| cg14527639 | 1.18E-10 | 2.15E-07 | 7.3439   | 14  | 79359526 | Body;Body;Body;Body;Body;Body;Body                                              | -306798  | NRXN3                    | LOC105370586 |
| cg01428849 | 1.19E-10 | 2.15E-07 | 7.342554 | 10  | 1.05E+08 | Body;Body                                                                       | 26898    | SH3PXD2A                 | SH3PXD2A     |
| cg20823730 | 1.19E-10 | 2.15E-07 | 7.342016 | 8   | 790768   | Body;Body                                                                       | 42458    | DLGAP2                   | LOC105377777 |
| cg14855150 | 1.19E-10 | 2.15E-07 | 7.341043 | 1   | 64608517 | 3'UTR;Body                                                                      | -29043   | ROR1                     | ROR1-AS1     |
| cg08118412 | 1.20E-10 | 2.16E-07 | 7.339213 | 3   | 64113418 | Body;Body                                                                       | 24273    | PRICKLE2                 | PRICKLE2-AS2 |
| cg06301297 | 1.23E-10 | 2.20E-07 | 7.334876 | 11  | 68043180 | TSS5000;TSS5000                                                                 | -3739    | C11orf24                 | C11orf24     |
| cg12137439 | 1.26E-10 | 2.25E-07 | 7.328856 | 21  | 44983258 | Body;TSS5000                                                                    | -1804    | HSF2BP;H2B51             | H2B51        |
| cg06749592 | 1.29E-10 | 2.30E-07 | -7.32324 | 2   | 2.33E+08 | Body;TSS200;TSS200                                                              | -90      | EFHD1                    | EFHD1        |
| cg27054514 | 1.30E-10 | 2.31E-07 | 7.321551 | 1   | 2252995  | Body                                                                            | 31105    | MORN1                    | LOC100129534 |
| cg20255933 | 1.31E-10 | 2.31E-07 | 7.320402 | 12  | 20094250 |                                                                                 | -73368   |                          | LINC02398    |
| cg08050663 | 1.33E-10 | 2.33E-07 | 7.317777 | 14  | 77725701 | 3'UTR                                                                           | -6859    | TMEM63C                  | MIR1260A     |
| cg10720966 | 1.35E-10 | 2.36E-07 | 7.314064 | 7   | 1.02E+08 | Body;Body;Body;Body;Body;Body                                                   | -64569   | CUX1                     | SH2B2        |
| cg25736198 | 1.39E-10 | 2.42E-07 | 7.30776  | 12  | 72345225 | Body                                                                            | 12601    | TPH2                     | TPH2         |
| cg05413061 | 1.40E-10 | 2.43E-07 | 7.305682 | 3   | 16225307 | Body;Body                                                                       | 9121     | GALNT15                  | GALNT15      |
| cg22572125 | 1.42E-10 | 2.45E-07 | 7.303433 | 7   | 56296973 |                                                                                 | -112863  |                          | NUPR2        |
| cg04016527 | 1.45E-10 | 2.49E-07 | 7.298441 | 17  | 36707775 | Body                                                                            | 54430    | SRCIN1                   | SRCIN1       |
| cg14180747 | 1.50E-10 | 2.56E-07 | 7.291571 | 9   | 37647717 | Body;Body;TSS5000                                                               | -3233    | FRMPD1                   | FRMPD1       |
| cg04704247 | 1.50E-10 | 2.56E-07 | 7.291353 | 4   | 1672920  | Body;Body;Body                                                                  | 12798    | FAM53A                   | FAM53A       |
| cg16022049 | 1.52E-10 | 2.58E-07 | 7.288213 | 12  | 13359372 | Body                                                                            | 9713     | EMP1                     | EMP1         |
| cg13170179 | 1.52E-10 | 2.58E-07 | 7.287638 | 14  | 69790294 | Body;Body                                                                       | 63420    | GALNT16                  | GALNT16      |
| cg09011038 | 1.53E-10 | 2.58E-07 | 7.286818 | 16  | 4385355  | Body;Body;TSS5000;TSS5000                                                       | 3131     | GLIS2;PAM16;CORO7-PAM16  | GLIS2        |
| cg11334499 | 1.55E-10 | 2.60E-07 | 7.284268 | 10  | 1.33E+08 | Body                                                                            | 106227   | TCERG1L                  | TCERG1L-AS1  |
| cg20129782 | 1.57E-10 | 2.62E-07 | 7.281651 | 20  | 30135362 | Body;Body;Body                                                                  | 25704    | HM13                     | HM13-AS1     |
| cg00819818 | 1.58E-10 | 2.63E-07 | 7.279743 | 17  | 38512762 | 3'UTR;3'UTR;3'UTR;3'UTR;TSS5000                                                 | 8227     | RARA;GJD3                | GJD3         |
| cg21903221 | 1.60E-10 | 2.66E-07 | 7.277244 | 14  | 1.06E+08 | Body;Body;Body                                                                  | -12893   | PACS2                    | TEX22        |
| cg08808258 | 1.61E-10 | 2.67E-07 | 7.275265 | 22  | 24671137 | Body;Body;Body;Body                                                             | 4339     | SPECC1L;SPECC1L-ADORA2A  | SPECC1L      |
| cg19301303 | 1.62E-10 | 2.67E-07 | 7.274613 | 4   | 1.2E+08  | Body;Body                                                                       | 37487    | SEC24D                   | SEC24D       |
| cg04168854 | 1.64E-10 | 2.69E-07 | 7.272022 | 10  | 1.05E+08 | TSS200                                                                          | -105     | RPEL1                    | RPEL1        |
| cg23694114 | 1.64E-10 | 2.69E-07 | -7.27086 | 17  | 15848221 | TSS200                                                                          | -9       | ADORA2B                  | ADORA2B      |
| cg18033335 | 1.65E-10 | 2.69E-07 | 7.270047 | 19  | 11034897 | TSS5000;TSS5000;TSS5000;Body;Body;Body;TSS5000                                  | 4418     | CARM1;YIPF2;TIMM29       | YIPF2        |
| cg24362829 | 1.66E-10 | 2.69E-07 | 7.2693   | 1   | 1.78E+08 | TSS5000;TSS5000                                                                 | -26636   | RASAL2                   | TEX35        |
| cg24738325 | 1.66E-10 | 2.70E-07 | 7.268253 | 1   | 9322665  | Body;Body                                                                       | 22760    | H6PD                     | H6PD         |
| cg14244251 | 1.68E-10 | 2.71E-07 | 7.266589 | 9   | 1.32E+08 | TSS5000;TSS5000;TSS5000;TSS5000;TSS5000;TSS5000;TSS5000;TSS5000;TSS5000;TSS5000 | -3348    | SH3GLB2;MIGA2            | MIGA2        |
| cg08036346 | 1.71E-10 | 2.74E-07 | 7.262537 | 15  | 68098991 | Body;Body;Body                                                                  | -18855   | MAP2K5                   | SKOR1        |
| cg12654045 | 1.71E-10 | 2.74E-07 | 7.262022 | 1   | 17559606 | Body                                                                            | -15986   | PADI1                    | PADI3        |
| cg05046097 | 1.73E-10 | 2.77E-07 | 7.259399 | 10  | 88717926 | TSS1500;Body;TSS1500                                                            | -429     | MMRN2;SNCG               | SNCG         |
| cg12290217 | 1.76E-10 | 2.81E-07 | 7.255605 | 15  | 99563030 | Body                                                                            | 5098     | LUNAR1                   | LUNAR1       |
| cg08621168 | 1.80E-10 | 2.84E-07 | 7.251242 | 8   | 56919462 | Body;Body                                                                       | 66998    | LYN                      | SNORD54      |
| cg25788513 | 1.80E-10 | 2.84E-07 | 7.250386 | 10  | 93314761 | Body                                                                            | 56456    | HECTD2-AS1               | HECTD2-AS1   |
| cg13509765 | 1.81E-10 | 2.84E-07 | 7.250266 | 9   | 1.34E+08 | Body;Body                                                                       | 23968    | ABL1                     | ABL1         |
| cg16791528 | 1.83E-10 | 2.86E-07 | 7.247919 | 2   | 79347532 | TSS200                                                                          | -81      | REG1A                    | REG1A        |
| cg10960375 | 1.84E-10 | 2.87E-07 | 7.246626 | 3   | 42694144 | TSS5000;TSS5000;TSS5000;TSS5000;TSS5000;TSS5000;TSS5000;TSS5000;TSS5000;TSS5000 | -1044    | NKTR;LOC101928323;ZBTB47 | ZBTB47       |
| cg17046586 | 1.87E-10 | 2.92E-07 | 7.242185 | 12  | 50665774 | Body;Body                                                                       | 11529    | LIMA1                    | LIMA1        |
| cg01168833 | 1.90E-10 | 2.95E-07 | 7.239424 | 12  | 1.06E+08 |                                                                                 | -141539  |                          | CASC18       |
| cg26456942 | 1.91E-10 | 2.96E-07 | 7.237465 | 2   | 2.42E+08 | TSS5000;TSS5000;TSS5000;TSS5000;TSS5000;TSS5000;TSS5000;TSS5000;TSS5000;TSS5000 | -2569    | STK25                    | STK25        |
| cg25314706 | 1.93E-10 | 2.98E-07 | 7.235511 | 2   | 1.28E+08 | Body                                                                            | -25552   | MYO7B                    | LOC105373609 |
| cg00215182 | 1.94E-10 | 2.98E-07 | 7.234185 | 1   | 22979495 | TSS5000;TSS5000;TSS5000;TSS5000;TSS1500;TSS1500                                 | -233     | C1QC;C1QB                | C1QB         |
| cg09797390 | 1.94E-10 | 2.98E-07 | 7.234007 | 1   | 1.12E+08 | TSS5000;TSS5000;TSS5000;TSS5000;TSS5000;TSS5000;TSS5000;TSS5000                 | 18922    | RAP1A;INKA2              | INKA2        |
| cg07442105 | 1.97E-10 | 3.00E-07 | 7.231432 | 16  | 66962501 | TSS5000;TSS5000;TSS5000;TSS5000                                                 | -3062    | RRAD;CIAO2B              | RRAD         |



Table S3. Differentially methylated CpG sites associated with NRBC counts

| Probe      | p_adj    | q_val    | t        | Chr | Pos.hg19 | locations                                           | dist2TSS | gene.Illumina        | gene.nearest |
|------------|----------|----------|----------|-----|----------|-----------------------------------------------------|----------|----------------------|--------------|
| cg06601579 | 3.25E-10 | 4.13E-07 | 7.12106  | 7   | 142966   | TESS000                                             | 6472     | LOC102723672         | LOC102723672 |
| cg22877230 | 3.29E-10 | 4.17E-07 | 7.118221 | 2   | 2.4E+08  | Body;Body                                           | 1475     | HDAC4;MGC16025       | MGC16025     |
| cg13941555 | 3.35E-10 | 4.23E-07 | 7.114187 | 1   | 2565265  | TSS1500                                             | -810     | MMEL1                | MMEL1        |
| cg00430287 | 3.36E-10 | 4.23E-07 | 7.11383  | 6   | 1.16E+08 | TSS1500                                             | -822     | FRK                  | FRK          |
| cg04896013 | 3.41E-10 | 4.28E-07 | 7.110431 | 15  | 89760469 | Body                                                | 4341     | RLBP1                | RLBP1        |
| cg19251737 | 3.41E-10 | 4.28E-07 | 7.110195 | 1   | 9795376  | Body;Body;Body                                      | 43852    | CLSTN1               | PIK3CD       |
| cg00085732 | 3.43E-10 | 4.28E-07 | 7.109264 | 17  | 26800820 | 1stExon;1stExon;5'UTR;5'UTR                         | 159      | SLC13A2              | SLC13A2      |
| cg16854200 | 3.46E-10 | 4.31E-07 | 7.107415 | 12  | 5603261  | Body;TSS200                                         | -36      | NTF3                 | NTF3         |
| cg08815359 | 3.50E-10 | 4.34E-07 | 7.104916 | 3   | 11606853 | TESS000;Body;Body;Body;Body;Body                    | 3419     | ATG7;VGLL4           | VGLL4        |
| cg11034708 | 3.57E-10 | 4.41E-07 | 7.100593 | 11  | 66436639 | TESS000;Body;Body                                   | 8719     | RBM4;RBM4B           | RBM4B        |
| cg16776231 | 3.57E-10 | 4.41E-07 | -7.10052 | 7   | 1.34E+08 | TSS200;TSS200;TSS200                                | -51      | LRGUK                | LRGUK        |
| cg10538486 | 3.60E-10 | 4.42E-07 | 7.098484 | 15  | 57810509 | Body;Body                                           | -73592   | CGNL1                | MYZAP        |
| cg01407576 | 3.60E-10 | 4.42E-07 | 7.098383 | 7   | 55515199 |                                                     | 79374    | VOPP1                | VOPP1        |
| cg26509870 | 3.60E-10 | 4.42E-07 | 7.09825  | 8   | 22076166 | TESS000;TESS000;TESS000;TESS000;TESS000             | 13446    | PHYHIP               | PHYHIP       |
| cg19466605 | 3.61E-10 | 4.42E-07 | 7.097621 | 12  | 57488961 | 3'UTR;3'UTR;TESS000;TESS000;TESS000;TESS000;TESS000 | 6065     | NAB2;STAT6           | NAB2         |
| cg12736760 | 3.64E-10 | 4.43E-07 | 7.096321 | 15  | 99330290 | Body;Body;TESS000                                   | 2636     | IGF1R;MIR4714        | MIR4714      |
| cg13312968 | 3.66E-10 | 4.43E-07 | 7.095001 | 10  | 1.14E+08 | Body                                                | 6576     | GUCY2GP              | GUCY2GP      |
| cg25796963 | 3.66E-10 | 4.43E-07 | 7.094661 | 3   | 52827657 | TESS000;TESS000;TESS000;TESS000;TSS1500             | -1126    | ITIH1;ITIH3          | ITIH3        |
| cg22097941 | 3.67E-10 | 4.43E-07 | 7.094484 | 6   | 32711028 | Body                                                | 1861     | HLA-DQA2             | HLA-DQA2     |
| cg04258189 | 3.68E-10 | 4.44E-07 | 7.093467 | 11  | 1.25E+08 |                                                     | -33451   |                      | PKNOX2       |
| cg26372765 | 3.69E-10 | 4.44E-07 | 7.092953 | 10  | 1.32E+08 | Body                                                | -23997   | EBF3                 | MIR4297      |
| cg05253226 | 3.71E-10 | 4.45E-07 | 7.091879 | 8   | 1.45E+08 | 1stExon                                             | 11792    | EPPK1                | EPPK1        |
| cg25562925 | 3.74E-10 | 4.47E-07 | 7.0899   | 2   | 25110049 | Body;Body                                           | 33057    | ADCY3                | ADCY3        |
| cg07992779 | 3.75E-10 | 4.47E-07 | 7.089471 | 19  | 15254683 |                                                     | -18086   |                      | ILVBL        |
| cg10883542 | 3.80E-10 | 4.51E-07 | 7.086689 | 10  | 1.19E+08 | Body                                                | -7493    | HSPA12A              | MIR9851      |
| cg12740857 | 3.80E-10 | 4.51E-07 | 7.086487 | 20  | 44237356 | Body                                                | -21021   | WFDC9                | WFDC10A      |
| cg07811262 | 3.83E-10 | 4.52E-07 | 7.084983 | 16  | 50871285 |                                                     | 30703    |                      | LINC02168    |
| cg00132888 | 3.83E-10 | 4.52E-07 | 7.084755 | 13  | 26599785 | 3'UTR;3'UTR                                         | 25413    | ATP8A2               | SHISA2       |
| cg25112747 | 3.84E-10 | 4.52E-07 | 7.084346 | 20  | 60798751 | TSS5000;TSS5000                                     | -3417    | HRH3;LOC105369209    | HRH3         |
| cg02158038 | 3.88E-10 | 4.56E-07 | 7.081823 | 3   | 1.94E+08 | Body;Body;Body;Body                                 | 14935    | TMEM44               | TMEM44-AS1   |
| cg03032497 | 3.91E-10 | 4.58E-07 | -7.08873 | 14  | 61108227 | TESS000;TESS000                                     | 2294     | SALRNA1;SIX1         | SALRNA1      |
| cg13908977 | 4.07E-10 | 4.75E-07 | -7.07138 | 16  | 11945749 | TSS1500                                             | -350     | RSL1D1               | RSL1D1       |
| cg23528142 | 4.13E-10 | 4.80E-07 | 7.067964 | 14  | 1.01E+08 | TSS200                                              | -68      | LINC00523            | LINC00523    |
| cg18118249 | 4.14E-10 | 4.80E-07 | 7.067675 | 11  | 75873027 |                                                     | 44519    |                      | WNT11        |
| cg06644719 | 4.15E-10 | 4.80E-07 | 7.06727  | 2   | 2.35E+08 |                                                     | 185031   |                      | LINC01891    |
| cg07575519 | 4.16E-10 | 4.80E-07 | 7.066652 | 5   | 16743265 | Body                                                | -126098  | MYO10                | RETREG1      |
| cg13544966 | 4.17E-10 | 4.80E-07 | 7.066141 | 10  | 640085   | Body                                                | -34418   | DIP2C                | LOC101930421 |
| cg12544392 | 4.20E-10 | 4.83E-07 | 7.064263 | 19  | 42544587 | Body;Body                                           | 25370    | GRIK5                | GRIK5        |
| cg20825472 | 4.23E-10 | 4.85E-07 | 7.062828 | 6   | 1.49E+08 | Body                                                | 78667    | UST                  | UST-AS1      |
| cg14333520 | 4.24E-10 | 4.85E-07 | 7.062202 | 4   | 8109007  | Body;Body;Body;Body;Body;Body                       | -35292   | ABLIM2               | ABLIM2       |
| cg09582256 | 4.25E-10 | 4.85E-07 | 7.061781 | 17  | 78515367 | TSS5000;TSS5000                                     | -3270    | RPTOR                | RPTOR        |
| cg27021406 | 4.31E-10 | 4.91E-07 | 7.058716 | 19  | 19224387 | TESS000;TESS000                                     | 24900    | SLC25A42             | TMEM161A     |
| cg02577788 | 4.34E-10 | 4.92E-07 | 7.057153 | 10  | 22770717 |                                                     | -43859   |                      | LOC100499489 |
| cg03649574 | 4.36E-10 | 4.92E-07 | 7.056176 | 1   | 1.58E+08 | 3'UTR;3'UTR                                         | 43915    | KIRREL1              | LINC01704    |
| cg26094842 | 4.37E-10 | 4.92E-07 | 7.055506 | 10  | 1.14E+08 | Body;Body;Body;Body;Body;Body;Body                  | 83019    | VTI1A                | MIR4295      |
| cg03605066 | 4.38E-10 | 4.92E-07 | 7.055439 | 5   | 1786804  |                                                     | 13147    |                      | MRPL36       |
| cg17881042 | 4.38E-10 | 4.92E-07 | 7.055313 | 17  | 78192008 | Body;Body;Body;TSS5000;TSS5000;TSS5000;TSS5000      | 2124     | SGSH;SLC26A11        | SGSH         |
| cg20775254 | 4.39E-10 | 4.93E-07 | 7.054464 | 2   | 95940705 | Body;Body;Body;Body                                 | 509      | PROM2                | PROM2        |
| cg00161955 | 4.46E-10 | 4.99E-07 | 7.051229 | 8   | 82608057 | TSS1500                                             | -764     | SLC10A5              | SLC10A5      |
| cg00757822 | 4.49E-10 | 5.01E-07 | 7.049739 | 3   | 1.55E+08 | Body;Body;Body;Body;Body                            | 89210    | PLCH1                | PLCH1        |
| cg08215453 | 4.50E-10 | 5.01E-07 | 7.049195 | 14  | 41623629 |                                                     | 199714   |                      | LINC02315    |
| cg18852305 | 4.52E-10 | 5.01E-07 | 7.048366 | 17  | 4475219  |                                                     | -11347   |                      | GGT6         |
| cg19282928 | 4.54E-10 | 5.02E-07 | 7.04744  | 2   | 2.42E+08 | 3'UTR;3'UTR;3'UTR                                   | 5680     | GPR35                | GPR35        |
| cg27060831 | 4.56E-10 | 5.03E-07 | 7.046159 | 16  | 48248004 | Body;Body;Body;Body;Body                            | 18178    | ABCC11               | ABCC11       |
| cg13185030 | 4.56E-10 | 5.03E-07 | -7.04615 | 14  | 55595949 | TSS200;TSS200                                       | -20      | LGALS3               | LGALS3       |
| cg02358190 | 4.61E-10 | 5.06E-07 | 7.043951 | 5   | 66187002 | Body;Body;Body;Body                                 | 62402    | MAST4                | MAST4        |
| cg16392754 | 4.63E-10 | 5.07E-07 | 7.042982 | 5   | 1.72E+08 | TSS5000;TSS5000;Body;Body;Body;Body                 | 2284     | LOC100268168;RPL26L1 | RPL26L1      |
| cg19854900 | 4.64E-10 | 5.07E-07 | 7.042634 | 7   | 4265529  | Body;Body                                           | -91060   | SDK1                 | LOC105375131 |
| cg08258667 | 4.75E-10 | 5.18E-07 | 7.037486 | 1   | 2.04E+08 | Body                                                | -33672   | SOX13                | ERLNC1       |

[illegible]

| Probe      | p_adj    | q_val    | t        | Chr | Pos.hg19 | locations                                                                            | dist2TSS | gene.Illumina           | gene.nearest |
|------------|----------|----------|----------|-----|----------|--------------------------------------------------------------------------------------|----------|-------------------------|--------------|
| cg04762890 | 7.01E-10 | 6.68E-07 | 6.951304 | 16  | 58077795 | Body                                                                                 | 18138    | MMP15                   | MMP15        |
| cg27617132 | 7.04E-10 | 6.70E-07 | 6.950238 | 10  | 1.35E+08 | Body;Body                                                                            | 49093    | INPP5A                  | INPP5A       |
| cg27045568 | 7.08E-10 | 6.71E-07 | 6.949108 | 17  | 40321545 | Body                                                                                 | 11615    | KCNH4                   | KCNH4        |
| cg12510201 | 7.08E-10 | 6.71E-07 | 6.949063 | 10  | 1.18E+08 | 3'UTR;3'UTR;3'UTR;3'UTR;3'UTR                                                        | 136412   | GFRA1                   | SNORD158     |
| cg05788437 | 7.24E-10 | 6.84E-07 | -6.94392 | 3   | 1.97E+08 | TSS1500;Body;1stExon;TSS1500                                                         | 127      | RUBCN;FYTTD1            | FYTTD1       |
| cg18089146 | 7.25E-10 | 6.84E-07 | 6.943695 | 5   | 60472989 | Body                                                                                 | -14694   | SMIM15-AS1              | SMIM15       |
| cg04909854 | 7.29E-10 | 6.84E-07 | 6.942498 | 1   | 1.7E+08  | TSS1500                                                                              | -595     | LINC01142               | LINC01142    |
| cg04486673 | 7.30E-10 | 6.84E-07 | 6.942324 | 17  | 66191540 | TSS5000                                                                              | -3260    | ARHGAP27P2              | ARHGAP27P2   |
| cg12658387 | 7.30E-10 | 6.84E-07 | 6.94206  | 17  | 81033543 | TSS5000                                                                              | -3941    | METRNL                  | METRNL       |
| cg13444966 | 7.31E-10 | 6.84E-07 | 6.941826 | 11  | 2705357  | Body;Body;Body                                                                       | 15871    | KCNQ1;KCNQ1OT1          | KCNQ1OT1     |
| cg01731204 | 7.33E-10 | 6.84E-07 | 6.941325 | 1   | 31194554 | Body;Body                                                                            | 1878     | MATN1;MATN1-AS1         | MATN1        |
| cg10024799 | 7.40E-10 | 6.89E-07 | 6.939264 | 12  | 2641381  | Body;Body;Body;Body;Body;Body;Body;Body;Body;Body;Body;Body;Body;Body;Body;Body;Body | 140005   | CACNA1C                 | CACNA1C-AS2  |
| cg07558734 | 7.41E-10 | 6.89E-07 | 6.938843 | 15  | 45827540 | Body;TSS5000                                                                         | -1908    | HMG2P46;SNORA41B        | SNORA41B     |
| cg16646726 | 7.54E-10 | 6.99E-07 | 6.935062 | 7   | 22641501 |                                                                                      | 38546    |                         | LOC100506178 |
| cg08312198 | 7.58E-10 | 7.02E-07 | 6.933715 | 2   | 2.36E+08 | Body;Body;Body;Body;Body;Body                                                        | 24974    | SH3BP4                  | SH3BP4       |
| cg03390183 | 7.62E-10 | 7.05E-07 | 6.932546 | 3   | 36779043 | 1stExon                                                                              | 2309     | DCLK3                   | DCLK3        |
| cg17303922 | 7.73E-10 | 7.13E-07 | 6.929449 | 7   | 44117899 | Body;Body;Body;Body;Body;Body;TSS5000                                                | 4230     | POLM;MIR6838            | POLM         |
| cg13008301 | 7.84E-10 | 7.22E-07 | -6.92634 | 20  | 54978749 | Body;Body;Body                                                                       | -8342    | CSTF1                   | CASS4        |
| cg05005332 | 7.87E-10 | 7.23E-07 | 6.925405 | 9   | 98979142 |                                                                                      | -29602   |                         | HSD17B3-AS1  |
| cg22011888 | 7.89E-10 | 7.23E-07 | 6.924953 | 11  | 63856712 | Body                                                                                 | -14649   | MACROD1                 | FLRT1        |
| cg14810242 | 7.95E-10 | 7.27E-07 | 6.92325  | 2   | 1.02E+08 | Body;Body;Body;Body                                                                  | 4566     | RFX8                    | RFX8         |
| cg26706961 | 8.05E-10 | 7.35E-07 | 6.920451 | 2   | 1.75E+08 |                                                                                      | -20994   |                         | LINC01960    |
| cg26343889 | 8.10E-10 | 7.37E-07 | 6.919077 | 15  | 68848244 | Body                                                                                 | -23087   | CORO2B                  | CORO2B       |
| cg01708964 | 8.11E-10 | 7.37E-07 | 6.918813 | 7   | 44181791 | TSS1500;TSS5000;TSS5000;TSS5000;TSS5000;TSS5000;TSS5000                              | -860     | MYL7;GCK                | MYL7         |
| cg18184053 | 8.14E-10 | 7.38E-07 | 6.91809  | 10  | 5882739  |                                                                                      | -27227   |                         | GDI2         |
| cg19003397 | 8.30E-10 | 7.51E-07 | 6.913798 | 8   | 82432003 |                                                                                      | 11622    |                         | FABP12       |
| cg14074428 | 8.34E-10 | 7.54E-07 | 6.912605 | 5   | 1.54E+08 |                                                                                      | -32982   |                         | MIR3141      |
| cg07129978 | 8.36E-10 | 7.54E-07 | 6.912116 | 17  | 39791049 | Body                                                                                 | 5402     | KRT42P                  | KRT42P       |
| cg17001401 | 8.46E-10 | 7.60E-07 | 6.90947  | 1   | 1.54E+08 | Body;Body                                                                            | -46805   | IL6R                    | IL6R-AS1     |
| cg07099121 | 8.46E-10 | 7.60E-07 | 6.909435 | 11  | 71146096 | 3'UTR;3'UTR                                                                          | -11696   | DHCR7                   | FLI42102     |
| cg09283977 | 8.48E-10 | 7.60E-07 | 6.908838 | 2   | 2.4E+08  | Body                                                                                 | 34733    | HDAC4                   | MGC16025     |
| cg15010109 | 8.53E-10 | 7.63E-07 | 6.907572 | 6   | 1.35E+08 |                                                                                      | 53663    |                         | ALDH8A1      |
| cg14173736 | 8.63E-10 | 7.69E-07 | 6.90503  | 9   | 1.36E+08 | TSS5000                                                                              | -7954    | CEL                     | CELP         |
| cg10811945 | 8.64E-10 | 7.69E-07 | 6.904914 | 1   | 1.57E+08 | Body;Body;Body;Body;Body;TSS1500                                                     | -628     | SH2D2A;NTRK1            | NTRK1        |
| cg01674405 | 8.65E-10 | 7.69E-07 | 6.904618 | 9   | 1.39E+08 |                                                                                      | -18376   |                         | UBAC1        |
| cg04632997 | 8.70E-10 | 7.72E-07 | 6.90328  | 20  | 60904163 | Body;TSS5000                                                                         | 3450     | LAMAS;MIR4758           | MIR4758      |
| cg08648138 | 8.72E-10 | 7.72E-07 | 6.902724 | 1   | 92247732 | Body;Body;Body;Body                                                                  | 103976   | TGFBR3                  | TGFBR3       |
| cg05531689 | 8.73E-10 | 7.72E-07 | 6.902538 | 2   | 26729139 | Body;Body                                                                            | -28147   | OTOF                    | OTOF         |
| cg27420946 | 8.81E-10 | 7.77E-07 | 6.90039  | 15  | 32404311 | Body;Body;Body                                                                       | 81594    | CHRNA7                  | CHRNA7       |
| cg03749915 | 8.84E-10 | 7.78E-07 | 6.899741 | 7   | 1.59E+08 | Body;TSS5000;TSS5000;TSS5000;TSS5000                                                 | 16132    | LINC00689;VIPR2         | LINC00689    |
| cg16874347 | 8.85E-10 | 7.78E-07 | 6.899464 | 2   | 86450216 | Body;Body;Body;Body;Body;Body                                                        | 23637    | REEP1                   | MRPL35       |
| cg12726658 | 8.91E-10 | 7.81E-07 | 6.897992 | 11  | 75927166 |                                                                                      | -9620    |                         | WNT11        |
| cg04208996 | 8.95E-10 | 7.83E-07 | 6.897037 | 8   | 1.44E+08 |                                                                                      | -11837   |                         | MAFA-AS1     |
| cg07017532 | 9.01E-10 | 7.87E-07 | 6.895533 | 1   | 12211767 |                                                                                      | -15232   |                         | MIR7846      |
| cg02433807 | 9.04E-10 | 7.88E-07 | 6.894753 | 16  | 11234924 | Body                                                                                 | 115115   | CLEC16A                 | SOC1         |
| cg09900893 | 9.08E-10 | 7.90E-07 | 6.893836 | 1   | 26865376 | Body;TSS5000                                                                         | -4226    | RPS6KA1                 | RPS6KA1      |
| cg20841588 | 9.17E-10 | 7.97E-07 | 6.891472 | 2   | 1.77E+08 | TSS1500                                                                              | -801     | MIR1246                 | MIR1246      |
| cg11177550 | 9.19E-10 | 7.97E-07 | 6.891038 | 1   | 20470903 | Body;Body                                                                            | 5088     | PLA2G2F                 | PLA2G2F      |
| cg03708680 | 9.25E-10 | 8.00E-07 | 6.889703 | 10  | 1.35E+08 |                                                                                      | 49988    |                         | LINC01168    |
| cg08568447 | 9.45E-10 | 8.16E-07 | 6.884915 | 17  | 7328520  | TSS5000;TSS1500;TSS5000;TSS5000                                                      | -414     | SPEM1;SPEM2;SPEM3       | SPEM2        |
| cg06898293 | 9.48E-10 | 8.16E-07 | 6.884262 | 7   | 1.15E+08 | Body                                                                                 | 31692    | LINC01393               | LINC01393    |
| cg01275566 | 9.48E-10 | 8.16E-07 | 6.884127 | 10  | 79684776 | Body;TSS5000                                                                         | 1737     | DLG5;DLG5-AS1           | DLG5         |
| cg08651187 | 9.51E-10 | 8.16E-07 | 6.883508 | 1   | 59726071 |                                                                                      | -36413   |                         | FGGY         |
| cg23915701 | 9.56E-10 | 8.18E-07 | 6.882335 | 1   | 2.35E+08 |                                                                                      | 45850    |                         | LOC101927851 |
| cg20032789 | 9.56E-10 | 8.18E-07 | 6.882333 | 10  | 30336565 | 5'UTR;1stExon;1stExon;5'UTR                                                          | 11950    | JCAD                    | JCAD         |
| cg19006220 | 9.61E-10 | 8.20E-07 | 6.881216 | 2   | 4050719  |                                                                                      | 28969    |                         | LOC105373394 |
| cg09559163 | 9.67E-10 | 8.24E-07 | 6.879765 | 10  | 1.3E+08  |                                                                                      | 214647   |                         | LINC01163    |
| cg03049693 | 9.75E-10 | 8.29E-07 | 6.877966 | 11  | 89465190 |                                                                                      | 21724    |                         | TRIM77       |
| cg05764121 | 9.77E-10 | 8.29E-07 | 6.877602 | 6   | 5082456  | Body;Body;Body;TSS5000                                                               | -3118    | LYRM4-AS1;LYRM4;PPP1R3G | PPP1R3G      |

| Probe      | p_adj    | q_val    | t        | Chr | Pos.hg19 | locations                                                                                                                  | dist2TSS | gene.Illumina                | gene.nearest |
|------------|----------|----------|----------|-----|----------|----------------------------------------------------------------------------------------------------------------------------|----------|------------------------------|--------------|
| cg04527220 | 9.85E-10 | 8.35E-07 | 6.875611 | 14  | 1.06E+08 | 5'UTR;5'UTR;Body;Body                                                                                                      | 9806     | GPR132                       | GPR132       |
| cg20249839 | 1.01E-09 | 8.52E-07 | 6.870614 | 19  | 49658532 | TESS5000;TESS5000;5'UTR;TSS5000;TSS5000;TSS5000;TSS5000;TSS5000                                                            | 121      | PPFIA3;HRC;TRPM4             | HRC          |
| cg19260189 | 1.02E-09 | 8.59E-07 | 6.8683   | 12  | 1.07E+08 | Body;Body;5'UTR                                                                                                            | 76       | LOC100287944;RFX4            | RFX4         |
| cg03648690 | 1.02E-09 | 8.60E-07 | 6.867766 | 13  | 99383591 | Body                                                                                                                       | 21335    | SLC15A1                      | SLC15A1      |
| cg03475821 | 1.03E-09 | 8.63E-07 | 6.866494 | 14  | 1.05E+08 | Body                                                                                                                       | 583      | LINC00638                    | LINC00638    |
| cg25675673 | 1.03E-09 | 8.68E-07 | 6.86477  | 6   | 88617150 | Body                                                                                                                       | 122573   | LOC101928911                 | LOC101928911 |
| cg24009650 | 1.04E-09 | 8.69E-07 | 6.864029 | 12  | 48722169 | TSS1500                                                                                                                    | -593     | H1-7                         | H1-7         |
| cg15857627 | 1.04E-09 | 8.69E-07 | 6.863828 | 12  | 1.31E+08 | Body;Body;Body;Body;Body                                                                                                   | 26015    | RIMBP2                       | RIMBP2       |
| cg18568657 | 1.04E-09 | 8.70E-07 | 6.863148 | 3   | 48517026 | Body;Body;Body;Body;Body;TSS5000;TSS5000                                                                                   | -2459    | SHISA5                       | SHISA5       |
| cg03399655 | 1.05E-09 | 8.73E-07 | 6.861805 | 3   | 1.13E+08 | TESS5000;TESS5000;Body;Body;Body                                                                                           | 20113    | CD200R1L-AS1;CD200R1L        | CD200R1L-AS1 |
| cg01698177 | 1.06E-09 | 8.78E-07 | 6.860252 | 16  | 19870092 | TESS5000;TESS5000;TESS5000;TESS5000;TESS5000;3'UTR;TESS5000                                                                | 26078    | IQCK;GPCR5B                  | GPCR5B       |
| cg06275635 | 1.06E-09 | 8.84E-07 | 6.858362 | 1   | 1.53E+08 | TSS1500                                                                                                                    | -800     | PGLYRP3                      | PGLYRP3      |
| cg12783693 | 1.07E-09 | 8.86E-07 | 6.857316 | 14  | 66532279 |                                                                                                                            | -420809  | CCDC196                      | CCDC196      |
| cg22724639 | 1.07E-09 | 8.86E-07 | 6.857003 | 8   | 12670236 | TSS1500;TSS1500;Body                                                                                                       | -1249    | LOC340357;LINC00681          | LOC340357    |
| cg16905004 | 1.07E-09 | 8.86E-07 | 6.856551 | 6   | 32317028 | Body;Body;Body;Body;Body;Body                                                                                              | 22652    | TSBP1-AS1;TSBP1              | TSBP1        |
| cg01972919 | 1.09E-09 | 8.95E-07 | 6.853661 | 4   | 736924   | Body;Body                                                                                                                  | 37304    | PCGF3                        | PCGF3        |
| cg21906911 | 1.09E-09 | 8.95E-07 | 6.85342  | 17  | 18169035 | 3'UTR;3'UTR;3'UTR                                                                                                          | 4612     | MIEF2                        | MIEF2        |
| cg04400620 | 1.09E-09 | 8.95E-07 | 6.852682 | 16  | 30385284 | TSS5000;Body;Body;TSS1500;TESS5000;TESS5000;TSS5000;TSS5000                                                                | -838     | TBC1D10B;MYLPP;SEPTIN1;ZNF48 | MYLPP        |
| cg01657380 | 1.09E-09 | 8.95E-07 | 6.852637 | 12  | 53901523 | TESS5000;TESS5000;TESS5000;TSS1500;TSS1500;Body;Body;Body;TESS5000;TESS5000;TESS5000;TESS5000;TESS5000                     | -255     | TARBP2;NPFF;ATF7-NPFF;ATF7   | NPFF         |
| cg05491376 | 1.09E-09 | 8.95E-07 | 6.852329 | 17  | 7641552  | Body;Body                                                                                                                  | -16085   | DNAH2                        | RPL29P2      |
| cg16184737 | 1.10E-09 | 8.97E-07 | 6.851021 | 7   | 2679971  | Body                                                                                                                       | 8352     | TTYH3                        | TTYH3        |
| cg13551098 | 1.10E-09 | 8.97E-07 | 6.850832 | 14  | 1.01E+08 | TSS5000;TSS5000;TSS5000;TSS5000;TSS5000;TSS5000;TSS5000;TSS5000;TSS5000;TSS5000;TSS5000;TSS5000                            | -2974    | MEG3                         | MEG3         |
| cg19677203 | 1.10E-09 | 8.97E-07 | -6.85045 | 6   | 31783322 | TSS1500;5'UTR                                                                                                              | 3        | HSPA1L;HSPA1A                | HSPA1A       |
| cg10690277 | 1.11E-09 | 9.04E-07 | 6.848437 | 7   | 55113199 | Body;Body;Body;Body;Body;Body;Body                                                                                         | 26475    | EGFR                         | EGFR         |
| cg05825053 | 1.12E-09 | 9.07E-07 | 6.84725  | 16  | 11697522 |                                                                                                                            | -16200   | LITAF                        | LITAF        |
| cg22064390 | 1.12E-09 | 9.07E-07 | 6.846871 | 7   | 2615547  | Body;Body;Body;Body;Body                                                                                                   | 16935    | IQCE                         | IQCE         |
| cg05781049 | 1.12E-09 | 9.07E-07 | 6.846367 | 10  | 44374390 | Body                                                                                                                       | 19532    | LINC00840                    | LINC00840    |
| cg24771111 | 1.13E-09 | 9.10E-07 | 6.845066 | 5   | 73893040 |                                                                                                                            | -42807   | HEXB                         | HEXB         |
| cg27373765 | 1.13E-09 | 9.10E-07 | 6.844615 | 5   | 1.77E+08 | TSS5000;Body;Body;Body;Body                                                                                                | -4810    | DBN1                         | DBN1         |
| cg14436098 | 1.13E-09 | 9.10E-07 | 6.844515 | 4   | 4690634  | Body                                                                                                                       | 24582    | STX18-AS1                    | SNORD162     |
| cg17811167 | 1.14E-09 | 9.13E-07 | -6.84349 | 17  | 36861499 | TESS5000;TSS5000;TSS200                                                                                                    | -26      | LOC105371763;MIR4734;MLLT6   | MLLT6        |
| cg24746106 | 1.14E-09 | 9.15E-07 | 6.842441 | 13  | 1.14E+08 | Body;Body;Body;Body;Body;Body;Body                                                                                         | 9330     | MCF2L                        | MCF2L        |
| cg07449447 | 1.15E-09 | 9.20E-07 | 6.840374 | 14  | 55228808 | Body;Body;Body                                                                                                             | 7258     | SAMD4A                       | SAMD4A       |
| cg03765822 | 1.15E-09 | 9.20E-07 | 6.840362 | 12  | 69519871 |                                                                                                                            | -113477  | CPSF6                        | CPSF6        |
| cg10300728 | 1.16E-09 | 9.20E-07 | 6.840169 | 13  | 1.13E+08 |                                                                                                                            | 24701    | SOX1-OT                      | SOX1-OT      |
| cg05008825 | 1.16E-09 | 9.22E-07 | 6.83912  | 7   | 94045725 | Body                                                                                                                       | 21519    | COL1A2                       | COL1A2       |
| cg18483750 | 1.17E-09 | 9.28E-07 | 6.837324 | 5   | 78406928 | TSS1500                                                                                                                    | -703     | BHMT                         | BHMT         |
| cg09814480 | 1.17E-09 | 9.29E-07 | 6.836811 | 7   | 1.35E+08 | TSS1500                                                                                                                    | -545     | STRA8                        | STRA8        |
| cg25407543 | 1.18E-09 | 9.30E-07 | 6.836006 | 8   | 21945413 | TSS1500;TSS1500;TSS1500;TSS1500;TSS1500;TSS1500;TSS1500;TSS1500                                                            | -1247    | FAM160B2                     | FAM160B2     |
| cg07291317 | 1.18E-09 | 9.32E-07 | 6.835263 | 5   | 16701194 | Body                                                                                                                       | -84027   | MYO10                        | RETREG1      |
| cg07001334 | 1.19E-09 | 9.35E-07 | 6.834217 | 10  | 1.13E+08 | Body                                                                                                                       | 101040   | RBM20                        | RBM20        |
| cg07949863 | 1.19E-09 | 9.38E-07 | 6.832977 | 20  | 17715916 | Body;Body;Body                                                                                                             | 35324    | BANF2                        | BANF2        |
| cg08550490 | 1.20E-09 | 9.38E-07 | 6.832552 | 1   | 2.04E+08 | Body                                                                                                                       | 24400    | PLEKHA6                      | PLEKHA6      |
| cg20323436 | 1.20E-09 | 9.38E-07 | 6.832261 | 12  | 97144035 | Body;Body                                                                                                                  | -156999  | CFAP54                       | NEDD1        |
| cg17412102 | 1.20E-09 | 9.39E-07 | 6.831606 | 1   | 2119531  | TESS5000;TESS5000;TESS5000;TESS5000;TESS5000;TESS5000;TESS5000;TESS5000;TSS5000;Body;Body;Body;Body;Body;TESS5000;TESS5000 | -4217    | PRKCZ;PRKCZ-AS1;FAAP20       | PRKCZ-AS1    |
| cg04341461 | 1.21E-09 | 9.42E-07 | 6.830642 | 1   | 2410006  | Body;Body;Body                                                                                                             | 2253     | PLCH2                        | PLCH2        |
| cg01469715 | 1.22E-09 | 9.48E-07 | 6.828787 | 16  | 27900716 | Body;Body;Body;TSS1500                                                                                                     | -1238    | SGS1L                        | SGS1L        |
| cg03249590 | 1.23E-09 | 9.56E-07 | -6.82648 | 12  | 57040199 | TSS1500;TSS5000;TSS1500                                                                                                    | -431     | ATP5F1B;SNORD59B;SNORD59A    | ATP5F1B      |
| cg00549018 | 1.23E-09 | 9.56E-07 | 6.826182 | 19  | 48968137 | 3'UTR;TSS5000;TSS5000                                                                                                      | -4327    | KCNJ14;CYTH2                 | CYTH2        |
| cg09644157 | 1.23E-09 | 9.56E-07 | 6.825798 | 12  | 1.25E+08 | Body;Body;Body                                                                                                             | -74424   | NCOR2                        | MIR6880      |
| cg23678322 | 1.24E-09 | 9.56E-07 | 6.824767 | 15  | 41801319 | Body;Body;Body                                                                                                             | 4706     | LTK                          | LTK          |
| cg06993420 | 1.24E-09 | 9.56E-07 | 6.824581 | 6   | 1.69E+08 |                                                                                                                            | 169095   |                              | LOC105378146 |
| cg16213787 | 1.24E-09 | 9.56E-07 | 6.824478 | 2   | 1.73E+08 |                                                                                                                            | 129663   |                              | DLX2-DT      |
| cg15923688 | 1.25E-09 | 9.58E-07 | 6.823059 | 17  | 79623755 | TSS5000;TSS200;Body;TSS200;Body                                                                                            | -183     | PDE6G                        | PDE6G        |
| cg02775369 | 1.25E-09 | 9.58E-07 | 6.823034 | 16  | 56316221 | Body;Body                                                                                                                  | 36790    | GNAO1                        | MIR3935      |
| cg26251854 | 1.25E-09 | 9.58E-07 | 6.822368 | 1   | 2.29E+08 |                                                                                                                            | -154734  |                              | RAB4A        |
| cg13958625 | 1.25E-09 | 9.58E-07 | 6.822365 | 20  | 49123093 | TSS5000;TSS5000                                                                                                            | -3764    | PTPN1                        | PTPN1        |
| cg03131736 | 1.26E-09 | 9.58E-07 | 6.821637 | 19  | 50985397 | Body;Body                                                                                                                  | -5292    | EMC10                        | FAM71E1      |

Table S3. Differentially methylated CpG sites associated with NRBC counts

| Probe      | p_adj    | q_val    | t        | Chr | Pos.hg19 | locations                                                                                                  | dist2TSS | gene.Illumina       | gene.nearest |
|------------|----------|----------|----------|-----|----------|------------------------------------------------------------------------------------------------------------|----------|---------------------|--------------|
| cg09657256 | 1.26E-09 | 9.58E-07 | 6.82123  | 17  | 42153683 | 3'UTR;3'UTR;Body;Body;TESS000;TESS000                                                                      | 5405     | G6PC3;HDAC5         | G6PC3        |
| cg15986469 | 1.26E-09 | 9.58E-07 | 6.821177 | 4   | 1192053  | Body;Body                                                                                                  | 10697    | SPON2;LOC100130872  | SPON2        |
| cg23536555 | 1.26E-09 | 9.58E-07 | 6.821067 | 12  | 1.02E+08 | Body;Body;Body;Body;Body;Body;Body;Body;Body                                                               | -31533   | MYBPC1              | CHPT1        |
| cg26348616 | 1.27E-09 | 9.66E-07 | 6.818836 | 20  | 39661470 | Body                                                                                                       | 4009     | TOP1                | TOP1         |
| cg07489488 | 1.28E-09 | 9.70E-07 | 6.817494 | 10  | 400897   | Body                                                                                                       | 174964   | DIP2C               | ZMYND11      |
| cg26226702 | 1.30E-09 | 9.82E-07 | 6.81379  | 14  | 1.06E+08 | Body;Body;Body                                                                                             | -39853   | PACS2               | BRF1         |
| cg13484848 | 1.30E-09 | 9.82E-07 | 6.813662 | 17  | 79131053 | Body                                                                                                       | -8253    | AATK                | PVALEF       |
| cg03605666 | 1.30E-09 | 9.82E-07 | 6.813645 | 19  | 3383594  | Body;Body;Body;Body;Body                                                                                   | 17014    | NFIC                | NFIC         |
| cg15573998 | 1.31E-09 | 9.86E-07 | 6.811873 | 2   | 51228125 | Body;Body;Body;Body;Body;Body;Body;Body;Body;Body;Body;Body;Body;Body;Body                                 | 31145    | NRXN1               | NRXN1        |
| cg16684958 | 1.31E-09 | 9.86E-07 | 6.811666 | 7   | 75615977 | 3'UTR;3'UTR;TESS000;TESS000;TESS000;TESS000                                                                | 7936     | POR;TMEM120A        | TMEM120A     |
| cg08735172 | 1.31E-09 | 9.86E-07 | 6.811652 | 11  | 45722809 |                                                                                                            | -9483    |                     | MIR7154      |
| cg16715363 | 1.32E-09 | 9.87E-07 | 6.810989 | 11  | 71711087 | TESS000;TESS000;TESS000;TESS000;Body;Body;Body;Body;Body;Body;Body;Body;Body;Body;Body;Body;Body;Body;Body | 115      | RNF121;IL18BP;NUMA1 | IL18BP       |
| cg13273097 | 1.32E-09 | 9.88E-07 | -6.81014 | 3   | 1.53E+08 | TESS1500                                                                                                   | -701     | RAP2B               | RAP2B        |
| cg18454774 | 1.32E-09 | 9.88E-07 | 6.810002 | 10  | 3378983  | Body                                                                                                       | 18097    | LOC105376360        | LOC105376360 |
| cg18574298 | 1.34E-09 | 9.98E-07 | 6.806733 | 21  | 47015398 | Body                                                                                                       | 1831     | LINC01694           | LINC01694    |
| cg11328697 | 1.34E-09 | 9.98E-07 | 6.806501 | 17  | 39971602 | TESS000;Body                                                                                               | 2347     | P3H4;FKBP10         | FKBP10       |
| cg02637309 | 1.35E-09 | 9.98E-07 | 6.806311 | 11  | 1.3E+08  | Body                                                                                                       | 27543    | ST14                | ST14         |
| cg13691901 | 1.35E-09 | 9.98E-07 | 6.806018 | 7   | 2011787  | Body;Body;Body;Body;Body                                                                                   | -31580   | MAD1L1              | MAD1L1       |
| cg16086782 | 1.35E-09 | 9.98E-07 | 6.805859 | 11  | 70741332 | Body                                                                                                       | -22859   | SHANK2              | MIR3664      |
| cg25811386 | 1.35E-09 | 9.98E-07 | 6.80557  | 12  | 49315068 | Body;Body;TESS000;TESS000;TESS000                                                                          | 3703     | CCDC65;FKBP11       | FKBP11       |
| cg14102880 | 1.36E-09 | 1.01E-06 | 6.803642 | 17  | 915634   | Body;Body;Body;Body;Body;Body;Body                                                                         | 10165    | ABR                 | MIR3183      |
| cg15223066 | 1.37E-09 | 1.01E-06 | 6.801707 | 10  | 33270717 |                                                                                                            | -23559   |                     | ITGB1        |
| cg00243187 | 1.38E-09 | 1.01E-06 | 6.801109 | 11  | 1.29E+08 |                                                                                                            | -8946    |                     | KCNJ1        |
| cg13464321 | 1.38E-09 | 1.01E-06 | 6.800639 | 9   | 1.36E+08 | Body;Body                                                                                                  | 23166    | ADAMTSL2            | ADAMTSL2     |
| cg04014002 | 1.39E-09 | 1.02E-06 | 6.799396 | 1   | 33206468 | TESS1500                                                                                                   | -962     | KIAA1522            | KIAA1522     |
| cg13156411 | 1.39E-09 | 1.02E-06 | 6.798957 | 3   | 46919454 | Body;TESS000                                                                                               | 244      | PTH1R               | PTH1R        |
| cg08198228 | 1.39E-09 | 1.02E-06 | 6.798345 | 2   | 1.1E+08  | Body                                                                                                       | -30539   | SH3RF3              | MIR4265      |
| cg19044706 | 1.40E-09 | 1.02E-06 | 6.797432 | 2   | 2.42E+08 | Body;Body;Body                                                                                             | 1767     | MAB21L4             | MAB21L4      |
| cg17667592 | 1.40E-09 | 1.02E-06 | 6.796822 | 11  | 1.23E+08 | 3'UTR;3'UTR;3'UTR;3'UTR;3'UTR;3'UTR;3'UTR;3'UTR;3'UTR;TESS000;TESS000                                      | 29315    | GRAMD1B;SCN3B       | SCN3B        |
| cg12640180 | 1.41E-09 | 1.02E-06 | 6.796553 | 8   | 1.44E+08 |                                                                                                            | 32736    |                     | LY6H         |
| cg13299743 | 1.41E-09 | 1.02E-06 | 6.796264 | 6   | 1523751  |                                                                                                            | -82014   |                     | FOXCUT       |
| cg11590213 | 1.42E-09 | 1.03E-06 | 6.794714 | 5   | 66331682 | Body;Body;Body;Body;Body                                                                                   | 31200    | MAST4               | MAST4        |
| cg02444226 | 1.42E-09 | 1.03E-06 | 6.794668 | 2   | 66545288 |                                                                                                            | 40172    |                     | MIR4778      |
| cg04367958 | 1.42E-09 | 1.03E-06 | 6.793881 | 16  | 11371350 | TESS000;TESS1500;TESS1500;TESS1500;TESS1500;TESS1500;TESS1500;TESS000                                      | -1013    | PRM3;PRM2;PRM1      | PRM2         |
| cg26786924 | 1.43E-09 | 1.03E-06 | 6.793487 | 2   | 2.19E+08 | Body;TESS1500;TESS000                                                                                      | -247     | PNKD;CATIP-AS2      | PNKD         |
| cg06535849 | 1.43E-09 | 1.03E-06 | 6.793109 | 16  | 81925084 | Body                                                                                                       | 112189   | PLCG2               | PLCG2        |
| cg17286712 | 1.44E-09 | 1.04E-06 | 6.790783 | 3   | 1.94E+08 |                                                                                                            | 33972    |                     | LINC02038    |
| cg08530632 | 1.44E-09 | 1.04E-06 | 6.790521 | 1   | 89037170 | Body                                                                                                       | -112656  | PKN2-AS1            | PKN2         |
| cg04913653 | 1.45E-09 | 1.04E-06 | 6.790365 | 3   | 21790232 | Body                                                                                                       | 2470     | ZNF385D             | ZNF385D      |
| cg23256630 | 1.45E-09 | 1.04E-06 | -6.79559 | 19  | 45681987 | TESS1500;TESS1500;TESS1500;TESS1500;TESS200                                                                | -54      | TRAPPC6A;BLOC1S3    | BLOC1S3      |
| cg06270545 | 1.45E-09 | 1.04E-06 | 6.789434 | 15  | 65385417 | 3'UTR                                                                                                      | 13280    | UBAP1L              | UBAP1L       |
| cg23894219 | 1.46E-09 | 1.04E-06 | 6.788566 | 1   | 1356565  | 5'UTR;5'UTR;5'UTR;TESS000                                                                                  | 91       | ANKRD65;TMEM88B     | ANKRD65      |
| cg10904854 | 1.46E-09 | 1.04E-06 | 6.788483 | 3   | 1.86E+08 |                                                                                                            | 64489    |                     | NMRAL2P      |
| cg00636675 | 1.46E-09 | 1.04E-06 | 6.788163 | 7   | 1.57E+08 |                                                                                                            | 46644    |                     | MIR153-2     |
| cg11784742 | 1.46E-09 | 1.04E-06 | 6.787986 | 10  | 88722838 | 3'UTR;3'UTR                                                                                                | 4483     | SNCG                | SNCG         |
| cg04879750 | 1.47E-09 | 1.04E-06 | 6.786268 | 12  | 1.31E+08 |                                                                                                            | 34650    |                     | LINC02419    |
| cg18707417 | 1.50E-09 | 1.06E-06 | 6.78138  | 3   | 46937363 | Body;Body                                                                                                  | 13625    | PTH1R               | PTH1R        |
| cg03284113 | 1.51E-09 | 1.06E-06 | 6.78128  | 19  | 1235093  | Body                                                                                                       | 2911     | CBARP               | CBARP        |
| cg21152351 | 1.51E-09 | 1.06E-06 | 6.781038 | 6   | 16057773 |                                                                                                            | -71543   |                     | MYLIP        |
| cg27295042 | 1.51E-09 | 1.06E-06 | 6.78048  | 1   | 10738569 | Body;Body                                                                                                  | 118134   | CASZ1               | CASZ1        |
| cg26718357 | 1.52E-09 | 1.07E-06 | 6.779639 | 8   | 22554232 | TESS000;TESS000;TESS000                                                                                    | -3239    | EGR3                | EGR3         |
| cg01420369 | 1.52E-09 | 1.07E-06 | 6.779509 | 12  | 6304565  | TESS000;TESS000                                                                                            | -4546    | CD9                 | CD9          |
| cg15578176 | 1.53E-09 | 1.07E-06 | 6.778345 | 1   | 1201631  | Body;Body;Body;Body                                                                                        | 7603     | UBE2J2              | UBE2J2       |
| cg17729668 | 1.53E-09 | 1.07E-06 | 6.777502 | 13  | 30727927 | TESS1500                                                                                                   | -716     | LINC00384           | LINC00384    |
| cg20480899 | 1.53E-09 | 1.07E-06 | 6.77701  | 12  | 11548867 | TESS1500;TESS1500                                                                                          | -366     | PRB1;PRB2           | PRB2         |
| cg02367918 | 1.54E-09 | 1.07E-06 | 6.776607 | 19  | 19289281 | Body;Body;Body;Body;Body;Body;Body;Body;Body;Body;Body;Body;Body;Body;Body                                 | -8209    | BORCS8-MEF2B;BORCS8 | MEF2B        |
| cg16366073 | 1.54E-09 | 1.08E-06 | 6.775765 | 21  | 32185576 | Body                                                                                                       | 16       | KRTAP8-1            | KRTAP8-1     |
| cg00454856 | 1.55E-09 | 1.08E-06 | 6.774349 | 16  | 58030811 | Body;TESS000;TESS000;TESS000;TESS000;TESS000                                                               | -2695    | ZNF319;USB1         | USB1         |
| cg03008241 | 1.56E-09 | 1.09E-06 | 6.772677 | 8   | 1.45E+08 | Body;Body;Body;Body;Body;Body;Body;Body;Body;Body;Body;Body;Body;Body;Body                                 | 21531    | PLEC                | PLEC         |
| cg03679716 | 1.58E-09 | 1.09E-06 | 6.771038 | 16  | 87379916 | Body;Body                                                                                                  | 28802    | FBXO31              | LOC101928659 |

| Probe      | p_adj    | q_val    | t        | Chr | Pos.hg19 | locations                                                                                                               | dist2TSS | gene.Illumina             | gene.nearest |
|------------|----------|----------|----------|-----|----------|-------------------------------------------------------------------------------------------------------------------------|----------|---------------------------|--------------|
| cg12299478 | 1.58E-09 | 1.09E-06 | 6.771017 | 10  | 1.12E+08 |                                                                                                                         | -23498   |                           | LOC105378479 |
| cg24986469 | 1.58E-09 | 1.09E-06 | 6.770967 | 14  | 1.03E+08 | 3'UTR;3'UTR;3'UTR;3'UTR                                                                                                 | -14144   | TRAF3                     | AMN          |
| cg05900058 | 1.58E-09 | 1.09E-06 | 6.770959 | 17  | 7690396  | Body                                                                                                                    | 32759    | DNAH2                     | RPL29P2      |
| cg15879620 | 1.59E-09 | 1.10E-06 | 6.768956 | 12  | 45032094 | Body;Body;Body;Body;Body                                                                                                | 237350   | NELL2                     | NELL2        |
| cg26549601 | 1.59E-09 | 1.10E-06 | 6.768846 | 10  | 1.35E+08 | Body;Body                                                                                                               | 39291    | INPP5A                    | NKX6-2       |
| cg07727170 | 1.61E-09 | 1.10E-06 | 6.767012 | 15  | 70458214 |                                                                                                                         | -67958   |                           | TLX3         |
| cg25402979 | 1.62E-09 | 1.11E-06 | 6.764952 | 12  | 58068659 |                                                                                                                         | -19078   |                           | OS9          |
| cg02434736 | 1.62E-09 | 1.11E-06 | 6.764783 | 17  | 67463366 | Body                                                                                                                    | 18307    | MAP2K6                    | LOC105371880 |
| cg10213114 | 1.63E-09 | 1.11E-06 | 6.763778 | 7   | 98885577 | Body                                                                                                                    | 14654    | MYH16                     | MYH16        |
| cg02426611 | 1.63E-09 | 1.11E-06 | 6.763514 | 16  | 87681276 | Body;Body                                                                                                               | 45163    | JPH3                      | JPH3         |
| cg15618758 | 1.63E-09 | 1.11E-06 | 6.763157 | 6   | 1.57E+08 | Body;Body;Body;Body                                                                                                     | -67969   | ARID1B                    | MIR4466      |
| cg15246825 | 1.64E-09 | 1.12E-06 | 6.762189 | 6   | 30956796 | 3'UTR;Body                                                                                                              | 5302     | MUC21                     | MUC21        |
| cg25948075 | 1.65E-09 | 1.12E-06 | 6.761162 | 3   | 1.26E+08 | Body;Body                                                                                                               | 45373    | TXNRD3                    | TXNRD3       |
| cg08518101 | 1.65E-09 | 1.12E-06 | 6.761134 | 16  | 83786701 | Body;Body;Body;Body                                                                                                     | 50880    | CDH13                     | LOC102724163 |
| cg08878651 | 1.65E-09 | 1.12E-06 | 6.761089 | 17  | 30066757 |                                                                                                                         | 119224   |                           | COPRS        |
| cg02935562 | 1.65E-09 | 1.12E-06 | 6.761033 | 16  | 19834374 | Body;Body;Body;Body;Body                                                                                                | 61796    | IQCK                      | GPRC5B       |
| cg15506060 | 1.65E-09 | 1.12E-06 | -6.76076 | 19  | 42432556 | 5'UTR;TSS1500                                                                                                           | 317      | ERFL;LOC100505585         | ERFL         |
| cg25052847 | 1.66E-09 | 1.12E-06 | 6.759699 | 2   | 1.62E+08 |                                                                                                                         | -226037  |                           | TANK         |
| cg11673964 | 1.67E-09 | 1.12E-06 | 6.758724 | 8   | 1.46E+08 | Body;Body;Body                                                                                                          | 23407    | ARHGAP39                  | ARHGAP39     |
| cg00500540 | 1.67E-09 | 1.12E-06 | 6.757844 | 16  | 56394104 | TESS000;TESS000;TESS000;TESS000                                                                                         | 64797    | GNAO1;AMFR                | AMFR         |
| cg15210427 | 1.69E-09 | 1.13E-06 | 6.755685 | 20  | 23548991 | 1stExon                                                                                                                 | 130      | CST9L                     | CST9L        |
| cg22421804 | 1.69E-09 | 1.13E-06 | 6.755492 | 5   | 54100067 |                                                                                                                         | -59981   |                           | LOC102467080 |
| cg11584499 | 1.71E-09 | 1.14E-06 | 6.753203 | 1   | 38322941 | 1stExon;TESS000;TESS000;TESS000;TESS000;TESS000;TESS000;TESS000;TESS000;TESS000;TESS000;TESS000;TESS000;TESS000;TESS000 | 2323     | MTF1;INPP5B               | MTF1         |
| cg07671695 | 1.71E-09 | 1.14E-06 | 6.752926 | 16  | 67421302 | TESS000;TESS000;TESS000;TESS000                                                                                         | 6099     | LRRC36;TPPP3              | TPPP3        |
| cg04182114 | 1.72E-09 | 1.15E-06 | 6.751785 | 15  | 63116019 | Body;TSS200                                                                                                             | -136     | TLN2;MIR190A              | MIR190A      |
| cg07444005 | 1.72E-09 | 1.15E-06 | 6.751445 | 13  | 21678461 |                                                                                                                         | -36191   |                           | SAP18        |
| cg14242024 | 1.72E-09 | 1.15E-06 | 6.751297 | 9   | 1.39E+08 | Body                                                                                                                    | 20287    | NACC2                     | NACC2        |
| cg01502320 | 1.72E-09 | 1.15E-06 | 6.751053 | 17  | 16875558 | TSS200;TESS000                                                                                                          | -126     | TNFRSF13B;LOC284191       | TNFRSF13B    |
| cg14006905 | 1.73E-09 | 1.15E-06 | 6.749655 | 9   | 36736771 |                                                                                                                         | 86825    |                           | MIR4475      |
| cg03436967 | 1.74E-09 | 1.15E-06 | 6.749187 | 7   | 1.47E+08 | Body                                                                                                                    | -131839  | CNTNAP2                   | MIR548F4     |
| cg20543183 | 1.75E-09 | 1.16E-06 | 6.747591 | 6   | 31648146 | 1stExon                                                                                                                 | 4        | LY6G5C                    | LY6G5C       |
| cg20108693 | 1.76E-09 | 1.16E-06 | 6.746951 | 8   | 1.44E+08 | 5'UTR                                                                                                                   | 15       | SLURP1                    | SLURP1       |
| cg07594209 | 1.77E-09 | 1.17E-06 | -6.74511 | 5   | 17218278 | TSS1500;Body;Body                                                                                                       | 539      | BASP1-AS1;BASP1           | BASP1        |
| cg22054328 | 1.78E-09 | 1.17E-06 | 6.744126 | 4   | 1.85E+08 | Body;Body                                                                                                               | 103760   | STOX2                     | STOX2        |
| cg01821113 | 1.78E-09 | 1.17E-06 | 6.743656 | 2   | 2.18E+08 | Body                                                                                                                    | 130076   | DIRC3                     | DIRC3-AS1    |
| cg23485639 | 1.79E-09 | 1.18E-06 | 6.742315 | 6   | 28045615 | TESS000;TSS5000                                                                                                         | -2730    | OR1F12;ZNF165             | ZNF165       |
| cg00860354 | 1.79E-09 | 1.18E-06 | 6.742297 | 16  | 88442765 |                                                                                                                         | -6601    |                           | ZNF469       |
| cg07093639 | 1.79E-09 | 1.18E-06 | 6.742082 | 7   | 1.57E+08 |                                                                                                                         | 51816    |                           | MIR153-2     |
| cg02280200 | 1.81E-09 | 1.18E-06 | 6.739665 | 12  | 286620   | 3'UTR                                                                                                                   | -26190   | IQSEC3                    | LOC101929384 |
| cg04453552 | 1.82E-09 | 1.18E-06 | 6.739527 | 16  | 57394387 | Body                                                                                                                    | 1693     | CCL22                     | CCL22        |
| cg26242064 | 1.82E-09 | 1.18E-06 | 6.739448 | 10  | 1.12E+08 |                                                                                                                         | -62707   |                           | SMNDC1       |
| cg06942727 | 1.82E-09 | 1.18E-06 | 6.739305 | 2   | 60322100 |                                                                                                                         | 288071   |                           | MIR4432HG    |
| cg05760947 | 1.82E-09 | 1.18E-06 | 6.738705 | 1   | 2.28E+08 |                                                                                                                         | -24748   |                           | ZNF678       |
| cg09815377 | 1.83E-09 | 1.19E-06 | 6.737984 | 6   | 30309236 | Body;Body;Body;Body;Body;Body;TSS5000;TSS5000;TSS5000                                                                   | -3696    | TRIM39;TRIM39-RPP21;RPP21 | RPP21        |
| cg25692451 | 1.85E-09 | 1.20E-06 | 6.735667 | 4   | 78035411 |                                                                                                                         | -38269   |                           | CCNI         |
| cg19642727 | 1.85E-09 | 1.20E-06 | 6.735455 | 1   | 853876   | Body;Body                                                                                                               | 1196     | LINC02593                 | LINC02593    |
| cg16426149 | 1.85E-09 | 1.20E-06 | 6.73525  | 17  | 80983536 | Body;Body;Body                                                                                                          | -18663   | B3GNTL1                   | B3GNTL1      |
| cg02157454 | 1.85E-09 | 1.20E-06 | 6.734767 | 6   | 32036404 | Body;Body                                                                                                               | -22499   | TNXB                      | TNXB         |
| cg09255332 | 1.86E-09 | 1.20E-06 | 6.734095 | 10  | 1.32E+08 | Body                                                                                                                    | -11672   | EBF3                      | MIR4297      |
| cg05364747 | 1.86E-09 | 1.20E-06 | 6.733968 | 1   | 2.29E+08 | Body;Body;Body                                                                                                          | 82166    | OBSCN                     | MIR6742      |
| cg14031465 | 1.87E-09 | 1.20E-06 | 6.732857 | 8   | 1.44E+08 | TSS5000                                                                                                                 | -1518    | LY6D                      | LY6D         |
| cg05221654 | 1.87E-09 | 1.20E-06 | 6.732811 | 16  | 32487825 |                                                                                                                         | -186523  |                           | LOC390705    |
| cg03729670 | 1.88E-09 | 1.20E-06 | 6.73168  | 7   | 600505   | Body;Body;Body;Body;Body;Body;TSS1500                                                                                   | -1089    | PRKAR1B;PRKAR1B-AS2       | PRKAR1B-AS2  |
| cg18147543 | 1.88E-09 | 1.20E-06 | 6.731277 | 1   | 16276294 | Body;Body;Body;Body;Body;Body                                                                                           | 26333    | ZBTB17                    | ZBTB17       |
| cg22453911 | 1.88E-09 | 1.20E-06 | 6.731238 | 19  | 2354290  | 3'UTR;3'UTR                                                                                                             | 25608    | SPPL2B                    | SPPL2B       |
| cg19038027 | 1.89E-09 | 1.21E-06 | 6.730251 | 10  | 1.34E+08 |                                                                                                                         | 43575    |                           | LOC107984282 |
| cg24302133 | 1.90E-09 | 1.21E-06 | 6.728873 | 1   | 1.82E+08 | 3'UTR;3'UTR;3'UTR                                                                                                       | 260674   | CACNA1E                   | ZNF648       |
| cg24923818 | 1.91E-09 | 1.21E-06 | 6.72852  | 19  | 14580273 | Body;Body;TESS000                                                                                                       | 5893     | PKN1;PTGER1               | PTGER1       |
| cg05184395 | 1.91E-09 | 1.21E-06 | 6.728216 | 6   | 1.69E+08 |                                                                                                                         | 171904   |                           | LOC105378146 |

| Probe      | p_adj    | q_val    | t        | Chr | Pos.hg19 | locations                                                       | dist2TSS | gene.Illumina           | gene.nearest |
|------------|----------|----------|----------|-----|----------|-----------------------------------------------------------------|----------|-------------------------|--------------|
| cg00775172 | 1.91E-09 | 1.21E-06 | 6.728202 | 22  | 37601268 | 3'UTR;3'UTR                                                     | 5461     | SSTR3                   | SSTR3        |
| cg14365123 | 1.91E-09 | 1.21E-06 | 6.727754 | 1   | 2938246  | 5'UTR                                                           | 216      | ACTRT2                  | ACTRT2       |
| cg19450046 | 1.91E-09 | 1.21E-06 | 6.727622 | 21  | 45712938 | Body                                                            | -6997    | AIRE                    | PFKL         |
| cg26016241 | 1.92E-09 | 1.21E-06 | 6.726964 | 19  | 17571656 | 1stExon                                                         | 79       | NXNL1                   | NXNL1        |
| cg11374884 | 1.93E-09 | 1.22E-06 | 6.725764 | 7   | 1.28E+08 | Body;Body;Body;Body;Body;Body;Body;Body                         | 18354    | CCDC136                 | CCDC136      |
| cg10457735 | 1.94E-09 | 1.22E-06 | 6.726419 | 21  | 37437505 | TSS5000;TSS5000;TSS5000;TSS5000;TSS5000;TSS5000;TSS5000;TSS5000 | -4681    | SETD4;LOC100133286;CBR1 | SETD4        |
| cg11971461 | 1.94E-09 | 1.22E-06 | 6.724389 | 4   | 1.43E+08 | Body;Body;Body                                                  | 65458    | IL15                    | IL15         |
| cg27278802 | 1.95E-09 | 1.23E-06 | 6.723375 | 11  | 66359430 | Body;TSS1500                                                    | 1104     | CCDC87;CCS              | CCDC87       |
| cg14151616 | 1.97E-09 | 1.23E-06 | -6.72175 | 19  | 10426492 | Body;TSS000;TSS5000                                             | 199      | FDX2;RAVER1             | FDX2         |
| cg15861089 | 1.98E-09 | 1.24E-06 | 6.720512 | 12  | 52695561 | Body                                                            | -10243   | KRT86                   | KRT81        |
| cg14824301 | 1.98E-09 | 1.24E-06 | 6.720454 | 11  | 61515894 | TSS5000;TSS5000                                                 | -4213    | DAGLA;MYRF              | MYRF         |
| cg26555126 | 1.99E-09 | 1.24E-06 | 6.719451 | 6   | 33998729 | Body;Body;Body;Body;Body;Body                                   | -30901   | GRM4                    | MIR1275      |
| cg01002508 | 1.99E-09 | 1.24E-06 | 6.718811 | 1   | 2.46E+08 | Body;Body                                                       | -529137  | SMYD3                   | KIF26B-AS1   |
| cg13169491 | 1.99E-09 | 1.24E-06 | 6.718479 | 7   | 1.28E+08 | Body;Body;Body;Body;Body                                        | -10472   | FAM71F1                 | CALU         |
| cg08245147 | 2.03E-09 | 1.27E-06 | 6.714036 | 7   | 1.51E+08 | TSS5000;TSS5000;TSS5000;TSS5000;TSS5000;TSS5000;TSS5000         | -28622   | NUB1;WDR86              | WDR86-AS1    |
| cg20102878 | 2.04E-09 | 1.27E-06 | 6.713598 | 10  | 1.19E+08 | Body                                                            | 10113    | SLC18A2                 | SLC18A2      |
| cg16334849 | 2.04E-09 | 1.27E-06 | 6.713046 | 8   | 36636869 |                                                                 | -5022    |                         | KCNU1        |
| cg09878269 | 2.05E-09 | 1.27E-06 | 6.712749 | 13  | 1.14E+08 | TSS1500;TSS1500                                                 | -437     | PROZ                    | PROZ         |
| cg25793425 | 2.05E-09 | 1.27E-06 | 6.712438 | 19  | 6007842  | Body;Body;Body                                                  | 29429    | LOC100128568;RFX2       | LOC100128568 |
| cg21006325 | 2.08E-09 | 1.28E-06 | 6.709132 | 21  | 44480624 | Body;Body;Body;Body;Body                                        | 7890     | CBS                     | CBS          |
| cg15502607 | 2.09E-09 | 1.29E-06 | 6.708479 | 1   | 1990986  | Body                                                            | 9137     | PRKCZ                   | PRKCZ        |
| cg24053265 | 2.10E-09 | 1.29E-06 | 6.707188 | 22  | 49498271 |                                                                 | 235690   |                         | LINC01310    |
| cg12837296 | 2.10E-09 | 1.29E-06 | 6.707149 | 17  | 42426483 | Body;TSS000                                                     | 4030     | GRN;FAM171A2            | GRN          |
| cg06286026 | 2.10E-09 | 1.29E-06 | 6.707141 | 4   | 3013267  | Body;Body;Body;Body;Body                                        | 47970    | GRK4                    | GRK4         |
| cg26166433 | 2.10E-09 | 1.29E-06 | 6.706775 | 15  | 78937416 | TSS5000;TSS5000                                                 | -3864    | CHRNA4                  | CHRNA4       |
| cg11236641 | 2.11E-09 | 1.29E-06 | 6.706221 | 1   | 3348815  | Body;Body                                                       | -22413   | PRDM16                  | ARHGFEF16    |
| cg24540066 | 2.12E-09 | 1.29E-06 | 6.705324 | 1   | 5891521  |                                                                 | 31280    |                         | MIR4689      |
| cg15285494 | 2.12E-09 | 1.29E-06 | 6.705187 | 4   | 1.88E+08 |                                                                 | -166605  |                         | FAT1         |
| cg16660494 | 2.12E-09 | 1.29E-06 | 6.705066 | 5   | 57073212 |                                                                 | 121777   |                         | LINC02225    |
| cg20905460 | 2.12E-09 | 1.29E-06 | 6.704775 | 7   | 1018498  | TSS5000;Body;TSS5000                                            | -3313    | COX19;C7orf50;CYP2W1    | COX19        |
| cg19069039 | 2.13E-09 | 1.30E-06 | 6.703742 | 12  | 52238665 | TSS5000                                                         | -3341    | FIGNL2-DT               | FIGNL2-DT    |
| cg08050907 | 2.15E-09 | 1.31E-06 | 6.701275 | 3   | 1.12E+08 | TSS1500;TSS1500;TSS5000                                         | -856     | TMPPSS7                 | TMPPSS7      |
| cg04311964 | 2.16E-09 | 1.31E-06 | 6.701046 | 8   | 1.44E+08 | 5'UTR                                                           | 8        | LYPD2                   | LYPD2        |
| cg16021847 | 2.17E-09 | 1.31E-06 | 6.700112 | 19  | 55689649 | Body;Body;TSS5000;TSS5000                                       | 1067     | SYT5;PTPRH              | SYT5         |
| cg06493289 | 2.17E-09 | 1.32E-06 | 6.699347 | 11  | 1.14E+08 | 1stExon;1stExon;1stExon;1stExon;1stExon                         | 423      | ZBTB16                  | ZBTB16       |
| cg20401945 | 2.18E-09 | 1.32E-06 | 6.698567 | 16  | 29912460 | TSS5000;TSS5000;TSS5000;TSS5000;TSS5000;TSS5000;1stExon         | 652      | SEZ6L2;ASPHD1           | ASPHD1       |
| cg04120487 | 2.18E-09 | 1.32E-06 | 6.698389 | 14  | 24524822 | TSS5000;TSS5000;TSS5000;TSS5000;TSS5000;TSS5000;TSS5000;Body    | 3605     | DHRS4L1;CARMIL3         | CARMIL3      |
| cg01804500 | 2.18E-09 | 1.32E-06 | 6.698116 | 1   | 9324932  | 3'UTR;3'UTR                                                     | 25027    | H6PD                    | H6PD         |
| cg14314458 | 2.19E-09 | 1.32E-06 | 6.697418 | 4   | 963830   | Body                                                            | 3527     | DGKQ                    | DGKQ         |
| cg04041000 | 2.19E-09 | 1.32E-06 | 6.697332 | 3   | 46919066 | TSS200;TSS5000                                                  | -144     | PTH1R                   | PTH1R        |
| cg06399569 | 2.20E-09 | 1.32E-06 | 6.696208 | 11  | 1.13E+08 | 3'UTR                                                           | 12504    | ANKK1                   | ANKK1        |
| cg00228118 | 2.21E-09 | 1.32E-06 | 6.695611 | 9   | 1.1E+08  |                                                                 | -226572  |                         | KLF4         |
| cg26070487 | 2.22E-09 | 1.32E-06 | 6.695024 | 10  | 47086508 | Body;Body                                                       | 2975     | NPY4R                   | NPY4R        |
| cg06804411 | 2.22E-09 | 1.32E-06 | 6.694851 | 1   | 1.53E+08 | TSS1500                                                         | -1251    | LELP1                   | LELP1        |
| cg25513073 | 2.22E-09 | 1.32E-06 | 6.694762 | 11  | 2481641  | Body;TSS1500                                                    | -1042    | KCNQ1                   | KCNQ1        |
| cg15374027 | 2.22E-09 | 1.32E-06 | 6.694505 | 17  | 15415649 | Body;Body;Body                                                  | -41499   | TVP23C-CDRT4;TVP23C     | CDRT3        |
| cg13355078 | 2.22E-09 | 1.32E-06 | 6.694473 | 6   | 2636363  | TSS5000;Body;Body                                               | -1526    | LINC01600;LINC02521     | LINC01600    |
| cg04663194 | 2.23E-09 | 1.32E-06 | 6.693939 | 11  | 66315239 | TSS5000;TSS5000;Body;Body                                       | 866      | ZDHHC24;ACTN3           | ACTN3        |
| cg14301000 | 2.23E-09 | 1.32E-06 | 6.693711 | 9   | 1.37E+08 | 1stExon                                                         | 288      | DBH                     | DBH          |
| cg12513686 | 2.23E-09 | 1.32E-06 | 6.693698 | 10  | 709592   | Body;3'UTR                                                      | 13618    | DIP2C;PRR26             | PRR26        |
| cg01809540 | 2.25E-09 | 1.33E-06 | 6.691918 | 11  | 77793764 | TSS5000;TSS5000;TSS5000;TSS5000;TSS5000;TSS5000                 | -2856    | NDUFC2-KCTD14;NDUFC2    | NDUFC2       |
| cg12598054 | 2.25E-09 | 1.33E-06 | 6.691862 | 4   | 7437156  | Body;TSS1500                                                    | -499     | SORCS2;PSAPL1           | PSAPL1       |
| cg01417432 | 2.25E-09 | 1.33E-06 | 6.691514 | 10  | 63913731 |                                                                 | 104616   |                         | ARID5B       |
| cg17357600 | 2.25E-09 | 1.33E-06 | 6.691371 | 20  | 44096016 | TSS5000                                                         | -2376    | WFDC2                   | WFDC2        |
| cg07912003 | 2.25E-09 | 1.33E-06 | 6.691269 | 2   | 75797838 | TSS1500                                                         | -993     | EVA1A                   | EVA1A        |
| cg24286200 | 2.25E-09 | 1.33E-06 | 6.691102 | 7   | 1.39E+08 | TSS5000;TSS5000;Body;Body;Body;Body;Body                        | 3228     | HIPK2;TBXAS1            | TBXAS1       |
| cg03605542 | 2.26E-09 | 1.33E-06 | 6.690521 | 5   | 59929339 | Body;Body                                                       | 66654    | DEPDC1B                 | DEPDC1B      |
| cg16251986 | 2.26E-09 | 1.33E-06 | 6.690123 | 15  | 1.02E+08 | Body;Body;Body                                                  | -5125    | PCSK6                   | PCSK6-AS1    |
| cg14120827 | 2.27E-09 | 1.33E-06 | 6.689852 | 9   | 88973574 | TSS5000;TSS5000;TSS5000;TSS5000                                 | -4249    | TUT7                    | TUT7         |
| cg00189989 | 2.27E-09 | 1.33E-06 | 6.689546 | 22  | 19513176 | TSS1500;TSS1500;TSS1500;TSS1500                                 | -316     | CLDN5                   | CLDN5        |

| Probe      | p_adj    | q_val    | t        | Chr | Pos.hg19 | locations                                                                                       | dist2TSS | gene.Illumina   | gene.nearest |
|------------|----------|----------|----------|-----|----------|-------------------------------------------------------------------------------------------------|----------|-----------------|--------------|
| cg15654892 | 2.27E-09 | 1.33E-06 | 6.68929  | 8   | 60834013 |                                                                                                 | 359946   |                 | CA8          |
| cg23978866 | 2.28E-09 | 1.33E-06 | 6.688568 | 2   | 47230407 | Body;Body;Body;Body                                                                             | -61413   | TTC7A           | MCDF2        |
| cg13662644 | 2.29E-09 | 1.33E-06 | 6.687751 | 19  | 7677237  | Body;Body                                                                                       | -5087    | CAMSAP3         | MIR6792      |
| cg15516226 | 2.30E-09 | 1.34E-06 | 6.686707 | 5   | 1.8E+08  | Body;Body;TESS000                                                                               | 254      | BTNL9;MIR8089   | BTNL9        |
| cg20988960 | 2.30E-09 | 1.34E-06 | 6.686511 | 1   | 3191815  | Body;Body                                                                                       | 147277   | PRDM16          | MIR4251      |
| cg03859929 | 2.31E-09 | 1.34E-06 | 6.685458 | 11  | 67291247 | TSS1500;TSS1500                                                                                 | -330     | CABP2           | CABP2        |
| cg22250586 | 2.33E-09 | 1.35E-06 | 6.683558 | 13  | 33704014 | Body;Body;Body;Body;Body;Body                                                                   | 56214    | STARD13         | STARD13      |
| cg01064758 | 2.36E-09 | 1.36E-06 | 6.681315 | 8   | 1.34E+08 | Body;TSS1500;TSS1500;TSS1500;TSS1500                                                            | -807     | TG;SLA          | SLA          |
| cg02400611 | 2.36E-09 | 1.37E-06 | 6.680792 | 3   | 1.95E+08 |                                                                                                 | -32042   |                 | XXYLT1-AS1   |
| cg06714360 | 2.36E-09 | 1.37E-06 | 6.680606 | 10  | 1.34E+08 | Body                                                                                            | -22446   | INPP5A          | INPP5A       |
| cg00808579 | 2.37E-09 | 1.37E-06 | 6.680214 | 1   | 40768026 | Body                                                                                            | 14932    | COL9A2          | COL9A2       |
| cg18465319 | 2.37E-09 | 1.37E-06 | 6.679547 | 3   | 1.16E+08 |                                                                                                 | 39227    | LSAMP           | LSAMP-AS1    |
| cg08115618 | 2.38E-09 | 1.37E-06 | 6.679448 | 8   | 1.35E+08 |                                                                                                 | 28754    |                 | LOC105375773 |
| cg01904151 | 2.38E-09 | 1.37E-06 | 6.679159 | 3   | 1.56E+08 |                                                                                                 | 52248    |                 | TIPARP       |
| cg23650353 | 2.38E-09 | 1.37E-06 | 6.678523 | 4   | 1.49E+08 | 3'UTR                                                                                           | 289898   | ARHGAP10        | MIR4799      |
| cg05264881 | 2.39E-09 | 1.37E-06 | 6.678267 | 1   | 15375148 | Body;Body;Body;Body;Body;Body;Body                                                              | 102734   | KAZN            | KAZN         |
| cg15318957 | 2.41E-09 | 1.38E-06 | 6.676489 | 6   | 32044104 | Body;Body                                                                                       | -30199   | TNXB            | TNXB         |
| cg26431815 | 2.41E-09 | 1.38E-06 | 6.676084 | 8   | 668053   | Body;Body;Body                                                                                  | 13171    | ERICH1          | ERICH1       |
| cg01580176 | 2.42E-09 | 1.38E-06 | 6.675685 | 14  | 24839226 | Body;Body;Body;Body;Body;Body;Body;Body;1stExon                                                 | 939      | NFATC4          | NFATC4       |
| cg11158902 | 2.42E-09 | 1.38E-06 | 6.6756   | 4   | 6536914  | Body;Body                                                                                       | 20428    | PPP2R2C         | PPP2R2C      |
| cg11757945 | 2.42E-09 | 1.38E-06 | 6.675392 | 1   | 54602356 | Body;TESS000                                                                                    | 16498    | CDCP2           | CDCP2        |
| cg11645098 | 2.43E-09 | 1.38E-06 | 6.674296 | 17  | 43198124 | Body                                                                                            | -6323    | PLCD3           | MIR6784      |
| cg27129144 | 2.46E-09 | 1.39E-06 | 6.671829 | 17  | 78848533 | Body;Body                                                                                       | -69101   | RPTOR           | LOC101928855 |
| cg04688645 | 2.46E-09 | 1.39E-06 | 6.671807 | 3   | 99772843 | Body;Body;Body                                                                                  | 60514    | CMSS1;FILIP1L   | FILIP1L      |
| cg10754341 | 2.46E-09 | 1.39E-06 | 6.671807 | 2   | 1.14E+08 |                                                                                                 | -32585   |                 | IL37         |
| cg02628907 | 2.47E-09 | 1.40E-06 | 6.670878 | 10  | 43562544 |                                                                                                 | -9930    |                 | RET          |
| cg26963259 | 2.47E-09 | 1.40E-06 | 6.670659 | 11  | 1299151  | Body;Body;Body;Body;Body                                                                        | 21317    | TOLLIP          | MIR6744      |
| cg16098955 | 2.48E-09 | 1.40E-06 | 6.669857 | 2   | 55172992 | Body                                                                                            | 64416    | EML6            | RTN4         |
| cg12084925 | 2.49E-09 | 1.40E-06 | 6.669281 | 6   | 33130696 | 3'UTR;3'UTR;3'UTR                                                                               | 19596    | COL11A2         | HCG24        |
| cg17155330 | 2.49E-09 | 1.40E-06 | 6.668923 | 13  | 1.11E+08 | 3'UTR;3'UTR;Body;Body;3'UTR;3'UTR;TESS000;TESS000;TESS000;TESS000                               | 22978    | NAXD;CARS2      | NAXD         |
| cg23884924 | 2.49E-09 | 1.40E-06 | 6.668594 | 19  | 18882253 | Body;Body                                                                                       | 19861    | CRT1            | COMP         |
| cg25544935 | 2.51E-09 | 1.41E-06 | 6.666799 | 6   | 1.69E+08 | Body;Body                                                                                       | 184288   | SMOC2           | SMOC2        |
| cg25377744 | 2.52E-09 | 1.41E-06 | 6.666212 | 13  | 47063673 |                                                                                                 | -22762   |                 | LINC01198    |
| cg05605194 | 2.52E-09 | 1.41E-06 | 6.666158 | 2   | 7739870  |                                                                                                 | 178479   |                 | LOC100506274 |
| cg18331061 | 2.53E-09 | 1.41E-06 | 6.665222 | 13  | 51818035 | Body;Body;Body                                                                                  | 21502    | FAM124A         | FAM124A      |
| cg07429804 | 2.53E-09 | 1.41E-06 | 6.665205 | 17  | 39666961 | TESS000                                                                                         | -5097    | KRT15           | KRT13        |
| cg20383521 | 2.53E-09 | 1.41E-06 | 6.665119 | 1   | 1.52E+08 | 3'UTR;3'UTR;3'UTR                                                                               | -29701   | TUFT1           | SNX27        |
| cg18192987 | 2.54E-09 | 1.42E-06 | 6.66415  | 2   | 1.45E+08 | Body;Body                                                                                       | -22706   | ZEB2            | ZEB2-AS1     |
| cg27471755 | 2.55E-09 | 1.42E-06 | 6.66374  | 19  | 35842445 | TESS000;TESS000;TESS000;TESS000;TESS000;5'UTR                                                   | 1        | CD22;FFAR1      | FFAR1        |
| cg22259242 | 2.55E-09 | 1.42E-06 | 6.663629 | 11  | 2021243  | TESS000;TESS000;TESS000;Body;TESS000                                                            | 1453     | HOTS;H19;MIR675 | H19          |
| cg03094083 | 2.55E-09 | 1.42E-06 | 6.663194 | 17  | 26864469 | 3'UTR;3'UTR                                                                                     | 13511    | FOXN1           | FOXN1        |
| cg04293770 | 2.55E-09 | 1.42E-06 | 6.663193 | 5   | 1.48E+08 |                                                                                                 | 111436   |                 | MIR584       |
| cg22981153 | 2.56E-09 | 1.42E-06 | 6.66256  | 8   | 1.42E+08 | 5'UTR;5'UTR                                                                                     | 278      | PTP4A3          | PTP4A3       |
| cg11479380 | 2.57E-09 | 1.42E-06 | 6.661417 | 7   | 1.16E+08 | TSS1500;Body;Body                                                                               | -1316    | TFEC            | TFEC         |
| cg24245305 | 2.58E-09 | 1.42E-06 | 6.661252 | 7   | 43351320 | Body;Body                                                                                       | 160827   | HECW1           | MIR3943      |
| cg10547843 | 2.61E-09 | 1.44E-06 | 6.658655 | 7   | 99601692 | Body;Body                                                                                       | 6380     | LOC105375423    | LOC105375423 |
| cg04930829 | 2.62E-09 | 1.44E-06 | 6.657351 | 6   | 41409982 |                                                                                                 | -60199   |                 | LINC01276    |
| cg15622527 | 2.63E-09 | 1.44E-06 | 6.656969 | 10  | 1749494  | Body                                                                                            | 30225    | ADARB2          | ADARB2       |
| cg03214715 | 2.63E-09 | 1.44E-06 | 6.656747 | 12  | 57873176 | TSS5000;TSS5000;TSS5000;TSS5000;TSS5000;TSS5000;TSS5000;1stExon;1stExon;1stExon                 | 214      | ARHGAP9         | ARHGAP9      |
| cg23520574 | 2.63E-09 | 1.44E-06 | 6.656614 | 11  | 4928572  | TSS200                                                                                          | -27      | OR51A7          | OR51A7       |
| cg06859833 | 2.63E-09 | 1.44E-06 | 6.656321 | 3   | 1.67E+08 |                                                                                                 | -55811   |                 | LOC105374194 |
| cg15305112 | 2.64E-09 | 1.44E-06 | 6.656162 | 2   | 2.36E+08 | Body;Body;Body;Body;Body                                                                        | -7716    | SH3BP4          | SH3BP4       |
| cg23870378 | 2.64E-09 | 1.44E-06 | 6.655659 | 14  | 1.01E+08 | TSS1500;TSS1500;TSS1500;TSS1500;TSS1500;TSS1500;TSS1500;TSS1500;TSS1500;TSS1500;TSS1500;TSS1500 | -1376    | MEG3            | MEG3         |
| cg11398309 | 2.64E-09 | 1.44E-06 | 6.655466 | 2   | 1.02E+08 |                                                                                                 | -87922   |                 | MAP4K4       |
| cg18048370 | 2.65E-09 | 1.44E-06 | 6.655217 | 10  | 1.35E+08 | Body                                                                                            | 30987    | CFAP46          | CFAP46       |
| cg16366373 | 2.65E-09 | 1.44E-06 | 6.655091 | 1   | 35501245 | TSS5000                                                                                         | -3699    | ZMYM6           | ZMYM6        |
| cg25477456 | 2.66E-09 | 1.45E-06 | 6.654193 | 18  | 32552858 | TSS5000                                                                                         | -4033    | MAPRE2          | MAPRE2       |
| cg13690873 | 2.66E-09 | 1.45E-06 | 6.653657 | 1   | 36587439 | Body;Body                                                                                       | 3384     | COL8A2          | COL8A2       |
| cg27143703 | 2.68E-09 | 1.45E-06 | 6.652721 | 17  | 77961719 | Body                                                                                            | -37067   | TBC1D16         | TBC1D16      |

| Probe      | p_adj    | q_val    | t        | Chr | Pos.hg19 | locations                                                                         | dist2TSS | gene.Illumina                       | gene.nearest |
|------------|----------|----------|----------|-----|----------|-----------------------------------------------------------------------------------|----------|-------------------------------------|--------------|
| cg12640930 | 2.69E-09 | 1.46E-06 | 6.65147  | 1   | 1.75E+08 | Body                                                                              | 14204    | TNN                                 | TNN          |
| cg01323840 | 2.70E-09 | 1.46E-06 | 6.651082 | 16  | 12901108 | TSS5000;TSS5000                                                                   | -3364    | CPED1                               | CPED1        |
| cg23458186 | 2.71E-09 | 1.47E-06 | 6.649713 | 19  | 3935938  | Body;Body;Body                                                                    | 2838     | NMRK2                               | NMRK2        |
| cg08498406 | 2.72E-09 | 1.47E-06 | 6.649272 | 8   | 27306846 | Body;Body;Body;Body                                                               | 15960    | PTK2B                               | MIR6842      |
| cg15995714 | 2.73E-09 | 1.48E-06 | 6.647982 | 10  | 1.34E+08 | Body;Body                                                                         | 11742    | PWWP2B                              | PWWP2B       |
| cg24195796 | 2.75E-09 | 1.48E-06 | 6.646589 | 15  | 29362669 | Body;Body;Body;Body;Body;Body;Body;Body;Body;Body;TSS200;TSS200                   | -191     | APBA2                               | APBA2        |
| cg23244540 | 2.76E-09 | 1.49E-06 | 6.645802 | 2   | 1.28E+08 |                                                                                   | 118655   | GYPC                                | GYPC         |
| cg21918848 | 2.77E-09 | 1.49E-06 | 6.645387 | 17  | 3776939  | Body;Body;Body                                                                    | 17098    | CAMKK1                              | CAMKK1       |
| cg05855039 | 2.78E-09 | 1.49E-06 | -6.65419 | 14  | 85996751 | Body;Body;Body;5'UTR;5'UTR;TSS1500;TSS5000;TSS5000                                | 264      | FLRT2                               | FLRT2        |
| cg12970662 | 2.83E-09 | 1.52E-06 | 6.640372 | 3   | 46873759 | Body;Body                                                                         | 1554     | PRSS42P                             | PRSS42P      |
| cg05338384 | 2.83E-09 | 1.52E-06 | 6.640048 | 7   | 1.57E+08 |                                                                                   | -10523   | NOM1                                | NOM1         |
| cg08788246 | 2.83E-09 | 1.52E-06 | 6.639884 | 22  | 20758901 | Body;Body;Body;Body;Body                                                          | 10461    | ZNF74                               | ZNF74        |
| cg26461880 | 2.84E-09 | 1.52E-06 | 6.63961  | 2   | 2.43E+08 | Body                                                                              | -13320   | LINC01237                           | LOC285097    |
| cg00804179 | 2.86E-09 | 1.53E-06 | 6.637722 | 3   | 13083974 | Body                                                                              | 30955    | IQSEC1                              | IQSEC1       |
| cg25565264 | 2.87E-09 | 1.53E-06 | 6.637299 | 5   | 1.57E+08 | Body                                                                              | 3147     | LSM11                               | LSM11        |
| cg07746960 | 2.88E-09 | 1.53E-06 | 6.636571 | 19  | 42546662 | Body;Body                                                                         | 23295    | GRIK5                               | GRIK5        |
| cg11356247 | 2.88E-09 | 1.54E-06 | 6.635963 | 7   | 1.58E+08 | Body;Body;Body;Body;Body                                                          | 97071    | PTPRN2                              | LOC100506585 |
| cg10702755 | 2.90E-09 | 1.54E-06 | 6.634429 | 8   | 528084   |                                                                                   | -32303   | TDRP                                | TDRP         |
| cg03065614 | 2.91E-09 | 1.55E-06 | 6.633775 | 6   | 44096542 | TSS1500;TSS5000;TSS5000;TSS1500;TSS1500;TSS1500;Body;Body                         | 1252     | MRPL14;TMEM63B                      | TMEM63B      |
| cg27213024 | 2.92E-09 | 1.55E-06 | 6.632808 | 6   | 1.44E+08 |                                                                                   | -15989   | PHACTR2                             | PHACTR2      |
| cg05168655 | 2.93E-09 | 1.55E-06 | 6.632621 | 6   | 1.67E+08 | Body;Body;Body;Body                                                               | -15320   | RPS6KA2                             | RPS6KA2      |
| cg05375811 | 2.93E-09 | 1.55E-06 | 6.632181 | 12  | 1.32E+08 | Body;Body                                                                         | -27500   | ADGRD1                              | ADGRD1-AS1   |
| cg25884442 | 2.93E-09 | 1.55E-06 | 6.63211  | 12  | 6178606  | Body                                                                              | -29257   | VWF                                 | SNORA120     |
| cg25931491 | 2.94E-09 | 1.55E-06 | 6.631944 | 11  | 1422468  | Body;Body;Body;Body                                                               | -9231    | BRSK2                               | BRSK2        |
| cg14018797 | 2.94E-09 | 1.55E-06 | 6.631656 | 7   | 1849782  |                                                                                   | 34107    | MIR4655                             | MIR4655      |
| cg26896748 | 2.94E-09 | 1.55E-06 | 6.631641 | 11  | 2861064  | Body;Body;TSS5000                                                                 | 21735    | KCNQ1;KCNQ1-AS1                     | KCNQ1-AS1    |
| cg16694664 | 2.95E-09 | 1.55E-06 | 6.630801 | 7   | 1.29E+08 | TSS5000;TSS5000;TSS5000                                                           | 292      | MIR182;MIR96;MIR183                 | MIR96        |
| cg01173944 | 2.95E-09 | 1.55E-06 | 6.630787 | 14  | 67986361 | TSS5000;Body;TSS5000;TSS5000;TSS5000;Body                                         | -4159    | TMEM229B                            | TMEM229B     |
| cg05345160 | 2.97E-09 | 1.56E-06 | 6.629554 | 6   | 1.45E+08 |                                                                                   | -57374   | UTRN                                | UTRN         |
| cg27276918 | 2.97E-09 | 1.56E-06 | 6.629415 | 8   | 1.45E+08 | TSS5000;TSS5000;TSS5000;TSS5000;TSS5000;TSS5000;TSS5000                           | 29426    | PLEC                                | PLEC         |
| cg14473516 | 2.98E-09 | 1.56E-06 | 6.628977 | 2   | 309026   |                                                                                   | -7257    | LINC01865                           | LINC01865    |
| cg16782184 | 2.98E-09 | 1.56E-06 | 6.628472 | 14  | 24555085 | Body;Body;Body;Body                                                               | -8434    | NRL                                 | PCK2         |
| cg26673975 | 2.99E-09 | 1.56E-06 | 6.627685 | 16  | 66420974 | Body                                                                              | 20381    | CDH5                                | CDH5         |
| cg18109186 | 3.00E-09 | 1.56E-06 | 6.627369 | 3   | 1.27E+08 | Body                                                                              | 23595    | PLXNA1                              | PLXNA1       |
| cg10632215 | 3.02E-09 | 1.57E-06 | 6.625881 | 22  | 47097566 | Body                                                                              | 36583    | CERK                                | CERK         |
| cg26453360 | 3.03E-09 | 1.58E-06 | 6.625034 | 11  | 46741373 | Body;Body                                                                         | 611      | F2                                  | F2           |
| cg01975706 | 3.07E-09 | 1.60E-06 | 6.621572 | 21  | 27015734 | Body;Body;Body;Body                                                               | 4141     | JAM2                                | JAM2         |
| cg17331904 | 3.08E-09 | 1.60E-06 | 6.621273 | 7   | 23749977 | Body;Body;5'UTR;5'UTR;Body                                                        | 140      | STK31                               | STK31        |
| cg19275832 | 3.08E-09 | 1.60E-06 | 6.620873 | 1   | 1.18E+08 |                                                                                   | 117496   | GDAP2                               | GDAP2        |
| cg11793646 | 3.09E-09 | 1.60E-06 | 6.620497 | 21  | 44087129 | Body;Body;Body;Body;Body;Body;Body;Body;Body;Body;Body;Body;Body;Body;Body;Body   | 13268    | PDE9A                               | PDE9A        |
| cg11569478 | 3.09E-09 | 1.60E-06 | 6.62036  | 4   | 1.2E+08  | Body;Body;Body;Body;Body                                                          | 100692   | SYNPO2                              | SYNPO2       |
| cg19251719 | 3.10E-09 | 1.60E-06 | 6.619704 | 1   | 2.03E+08 | TSS1500;Body                                                                      | -339     | MYOG;MYOPARR                        | MYOG         |
| cg04654153 | 3.12E-09 | 1.61E-06 | -6.61837 | 2   | 1.77E+08 | TSS5000;TSS5000                                                                   | -1864    | HOXD13;HOXD12                       | HOXD12       |
| cg16875711 | 3.13E-09 | 1.61E-06 | 6.617552 | 18  | 51798822 | Body;Body;Body;Body;Body;Body;Body;Body;Body;Body;Body;Body;Body;Body;Body        | 2879     | POLI                                | POLI         |
| cg04213213 | 3.14E-09 | 1.62E-06 | 6.617029 | 3   | 16831943 |                                                                                   | -94504   | PLCL2                               | PLCL2        |
| cg27403117 | 3.14E-09 | 1.62E-06 | 6.616703 | 16  | 70698053 | TSS5000;TSS5000;TSS5000;Body                                                      | 21903    | IL34;MTSS2                          | MTSS2        |
| cg05238976 | 3.14E-09 | 1.62E-06 | 6.616561 | 10  | 44140134 | Body;Body;Body;Body;Body;Body;Body;Body;Body;TSS1500                              | 815      | ZNF32-AS3;ZNF32;ZNF32-AS1;ZNF32-AS2 | ZNF32-AS1    |
| cg16420340 | 3.15E-09 | 1.62E-06 | 6.616442 | 12  | 31083391 | Body;Body;Body                                                                    | 3554     | TSPAN11                             | TSPAN11      |
| cg01278797 | 3.17E-09 | 1.62E-06 | 6.615091 | 16  | 2339405  | Body                                                                              | 14785    | ABCA3                               | MIR4717      |
| cg15922246 | 3.17E-09 | 1.62E-06 | 6.614854 | 7   | 1.51E+08 | TSS1500;TSS1500;TSS1500;Body;Body;TSS5000;TSS5000;TSS5000;TSS5000;TSS5000;TSS5000 | -833     | FASTK;TMUB1;AGAP3                   | FASTK        |
| cg06107104 | 3.18E-09 | 1.63E-06 | 6.61395  | 17  | 73617762 | Body                                                                              | -11751   | MYO15B                              | SMIM5        |
| cg06639691 | 3.19E-09 | 1.63E-06 | 6.613012 | 10  | 1.19E+08 | TSS200                                                                            | -180     | KCNK18                              | KCNK18       |
| cg21162779 | 3.20E-09 | 1.63E-06 | 6.612889 | 1   | 2564998  | TSS1500                                                                           | -543     | MMEL1                               | MMEL1        |
| cg13271206 | 3.20E-09 | 1.63E-06 | 6.612623 | 11  | 75109830 | TSS1500;TSS1500;TSS1500;TSS1500;TSS5000                                           | -704     | RPS3;SNORD15A                       | RPS3         |
| cg07050194 | 3.23E-09 | 1.64E-06 | 6.610769 | 14  | 34233812 | Body;Body;Body;Body                                                               | 55670    | NPAS3                               | SNORA89      |
| cg18207011 | 3.23E-09 | 1.64E-06 | 6.610503 | 14  | 68861095 | Body;Body;Body;Body;Body;Body;Body;Body;Body;Body;Body;Body;Body;Body             | 234409   | RAD51B                              | LOC100996664 |
| cg03516551 | 3.26E-09 | 1.66E-06 | 6.608591 | 7   | 2764919  | Body;TSS5000;TSS5000;TSS5000;TSS5000                                              | 37084    | AMZ1;GNA12                          | AMZ1         |
| cg10943877 | 3.27E-09 | 1.66E-06 | 6.608054 | 5   | 1.45E+08 | Body                                                                              | 11206    | GRXCR2                              | GRXCR2       |
| cg13143743 | 3.27E-09 | 1.66E-06 | 6.607908 | 3   | 1.78E+08 | Body                                                                              | 36042    | LINC02015                           | LINC02015    |

| Probe      | p_adj    | q_val    | t        | Chr | Pos.hg19 | locations                                                                         | dist2TSS | gene.Illumina        | gene.nearest |
|------------|----------|----------|----------|-----|----------|-----------------------------------------------------------------------------------|----------|----------------------|--------------|
| cg13862169 | 3.27E-09 | 1.66E-06 | 6.60767  | 1   | 2.01E+08 | TSS5000                                                                           | -3469    | TMEM9                | TMEM9        |
| cg26671873 | 3.28E-09 | 1.66E-06 | 6.607013 | 4   | 1.88E+08 |                                                                                   | -18613   |                      | LINC02374    |
| cg05323683 | 3.32E-09 | 1.68E-06 | 6.604384 | 8   | 95168291 | Body;Body                                                                         | 52492    | CDH17                | CDH17        |
| cg06739525 | 3.32E-09 | 1.68E-06 | 6.604147 | 2   | 45417905 | Body                                                                              | 64175    | LINC01121            | LINC01121    |
| cg00411697 | 3.33E-09 | 1.68E-06 | 6.603809 | 11  | 1.17E+08 | TSS5000;TSS5000;TSS1500;TSS200;TSS200                                             | -185     | ZPR1;APOA5           | APOA5        |
| cg17524821 | 3.33E-09 | 1.68E-06 | 6.603606 | 19  | 15535460 | Body;Body;Body;Body                                                               | -5661    | WIZ                  | AKAP8L       |
| cg16926712 | 3.35E-09 | 1.69E-06 | 6.602237 | 8   | 28657193 | Body;Body;Body;Body;Body                                                          | 90239    | INTS9                | INTS9        |
| cg23296684 | 3.36E-09 | 1.69E-06 | 6.602    | 10  | 93108887 | Body                                                                              | -60104   | HECTD2-AS1           | HECTD2       |
| cg14422903 | 3.37E-09 | 1.69E-06 | 6.601089 | 9   | 36742062 |                                                                                   | 81534    |                      | MIR4475      |
| cg11301967 | 3.38E-09 | 1.70E-06 | 6.600256 | 5   | 1.33E+08 | Body;TESS000                                                                      | 3133     | FSTL4;MIR1289-2      | MIR1289-2    |
| cg00040322 | 3.39E-09 | 1.70E-06 | 6.599911 | 2   | 11240641 | Body                                                                              | 31661    | FLJ33534             | FLJ33534     |
| cg04682087 | 3.40E-09 | 1.70E-06 | 6.598799 | 2   | 875946   |                                                                                   | -11834   |                      | LINC01115    |
| cg26797894 | 3.42E-09 | 1.71E-06 | 6.597673 | 2   | 2.11E+08 |                                                                                   | -7341    |                      | KANSL1L      |
| cg00901675 | 3.43E-09 | 1.71E-06 | 6.59713  | 13  | 30728236 | TSS1500                                                                           | -1025    | LINC00384            | LINC00384    |
| cg18778299 | 3.45E-09 | 1.72E-06 | 6.59605  | 3   | 1.34E+08 | TSS1500;TESS000                                                                   | -1163    | C3orf36;SLCO2A1      | C3orf36      |
| cg03930004 | 3.46E-09 | 1.72E-06 | 6.594929 | 7   | 1.51E+08 | TSS1500;TSS1500;TSS1500;Body;Body;TSS5000;TSS5000;TSS5000;TSS5000;TSS5000;TSS5000 | -821     | FASTK;TMUB1;AGAP3    | FASTK        |
| cg19669199 | 3.46E-09 | 1.72E-06 | 6.594778 | 19  | 7584241  | 1stExon;TSS5000                                                                   | 3253     | ZNF358;MCO1N1        | ZNF358       |
| cg13859183 | 3.47E-09 | 1.72E-06 | 6.594626 | 13  | 67196386 | Body;Body;Body;Body                                                               | -202914  | PCDH9                | PCDH9-AS2    |
| cg13194638 | 3.48E-09 | 1.73E-06 | 6.593875 | 17  | 37725898 |                                                                                   | 38275    |                      | NEUROD2      |
| cg04533623 | 3.48E-09 | 1.73E-06 | 6.593541 | 9   | 1.4E+08  | TSS5000;TSS5000                                                                   | -4250    | AGPAT2               | AGPAT2       |
| cg21232935 | 3.49E-09 | 1.73E-06 | 6.593286 | 7   | 51113700 | Body;Body;Body;Body;Body                                                          | -252550  | COBL                 | GRB10        |
| cg04574834 | 3.49E-09 | 1.73E-06 | 6.592909 | 10  | 99891730 | TSS5000;TSS5000;TSS5000;TSS5000;TSS5000;TSS5000;TSS5000;TSS5000;TSS5000;TSS5000   | -2650    | R3HCC1L              | R3HCC1L      |
| cg20862496 | 3.52E-09 | 1.74E-06 | 6.591404 | 8   | 1.44E+08 | Body                                                                              | 90       | SLURP1               | SLURP1       |
| cg24478926 | 3.52E-09 | 1.74E-06 | 6.591028 | 11  | 69237550 | TSS5000                                                                           | -2872    | LOC102724265         | LOC102724265 |
| cg06294856 | 3.52E-09 | 1.74E-06 | 6.591019 | 9   | 18776340 | Body                                                                              | 203037   | ADAMTSL1             | MIR3152      |
| cg14269525 | 3.53E-09 | 1.74E-06 | 6.590493 | 14  | 98214031 | TESS000                                                                           | 15137    | LINC02312            | LINC02312    |
| cg03956353 | 3.53E-09 | 1.74E-06 | 6.590354 | 1   | 1.1E+08  | TSS200;TSS200;TSS200;TSS200                                                       | -97      | EPS8L3               | EPS8L3       |
| cg22849635 | 3.55E-09 | 1.74E-06 | 6.589542 | 17  | 7910804  | Body                                                                              | 4872     | GUCY2D               | GUCY2D       |
| cg06521145 | 3.55E-09 | 1.74E-06 | 6.589129 | 19  | 2048650  | Body;Body                                                                         | 2593     | MKNK2                | MKNK2        |
| cg19007167 | 3.56E-09 | 1.74E-06 | 6.588737 | 2   | 2.43E+08 | Body;Body;Body;Body;Body                                                          | 2860     | NEU4                 | NEU4         |
| cg26736154 | 3.57E-09 | 1.74E-06 | 6.588121 | 15  | 37020592 | Body;Body;Body;Body;Body;Body;Body;Body;Body;Body                                 | 90115    | C15orf41             | CSNK1A1P1    |
| cg22433647 | 3.57E-09 | 1.74E-06 | 6.588048 | 1   | 18021329 | Body;Body;Body;Body;Body;Body;Body                                                | -60498   | ARHGEF10L            | ACTL8        |
| cg20747012 | 3.57E-09 | 1.74E-06 | 6.587926 | 7   | 1.15E+08 | Body;Body                                                                         | 11536    | MDFIC                | MDFIC        |
| cg03419232 | 3.57E-09 | 1.74E-06 | 6.587926 | 6   | 1.58E+08 | Body;Body                                                                         | 54570    | SYNJ2                | SYNJ2        |
| cg12235469 | 3.61E-09 | 1.76E-06 | 6.585559 | 11  | 12746796 | Body                                                                              | 50829    | TEAD1                | TEAD1        |
| cg24375627 | 3.62E-09 | 1.76E-06 | 6.584823 | 1   | 1.54E+08 | TSS1500;TESS000                                                                   | -817     | S100A6;S100A5        | S100A6       |
| cg23892392 | 3.63E-09 | 1.77E-06 | 6.584432 | 4   | 1172078  | Body                                                                              | -5079    | SPON2                | SPON2        |
| cg21539981 | 3.65E-09 | 1.77E-06 | 6.5832   | 8   | 58106094 |                                                                                   | -24740   |                      | LINC01606    |
| cg14433037 | 3.65E-09 | 1.77E-06 | 6.583059 | 7   | 824325   | Body;Body                                                                         | -30868   | DNAAF5               | SUN1         |
| cg27649253 | 3.65E-09 | 1.77E-06 | 6.582914 | 19  | 5245891  | Body;Body;Body;Body                                                               | 94932    | PTPRS                | PTPRS        |
| cg22388471 | 3.65E-09 | 1.77E-06 | 6.582844 | 6   | 52363701 | TESS000;TESS000;TESS000;3'UTR                                                     | 77896    | EFHC1;TRAM2          | EFHC1        |
| cg25616787 | 3.66E-09 | 1.77E-06 | 6.582396 | 1   | 9409349  | Body                                                                              | 56397    | SPSB1                | SPSB1        |
| cg18256432 | 3.69E-09 | 1.78E-06 | 6.580851 | 14  | 74823368 | Body                                                                              | 8195     | VRTN                 | VRTN         |
| cg22511877 | 3.72E-09 | 1.80E-06 | 6.57867  | 2   | 1942942  | Body;Body;Body;Body;Body;Body;Body;Body;Body;Body                                 | -194655  | MYT1L                | PXDN         |
| cg05404847 | 3.74E-09 | 1.80E-06 | 6.57779  | 19  | 42931316 | Body;5'UTR;Body;TESS000;TESS000                                                   | 224      | LIPE-AS1;LIPE;CXCL17 | LIPE         |
| cg16510460 | 3.74E-09 | 1.80E-06 | 6.577502 | 3   | 1.84E+08 | Body                                                                              | 4942     | LOC107986163         | LOC107986163 |
| cg09075327 | 3.75E-09 | 1.80E-06 | 6.577273 | 8   | 18708915 | Body;Body                                                                         | 35652    | PSD3                 | PSD3         |
| cg00866863 | 3.75E-09 | 1.80E-06 | 6.576821 | 14  | 94453019 |                                                                                   | -10103   |                      | ASB2         |
| cg16999602 | 3.76E-09 | 1.80E-06 | 6.576646 | 1   | 53608163 | 5'UTR;5'UTR;5'UTR;Body;5'UTR                                                      | 147      | SLC1A7               | SLC1A7       |
| cg01779679 | 3.77E-09 | 1.81E-06 | 6.575866 | 16  | 87857222 |                                                                                   | 11044    |                      | MIR6775      |
| cg24474279 | 3.78E-09 | 1.81E-06 | 6.575242 | 1   | 1.74E+08 | 3'UTR;Body                                                                        | -6899    | ANKRD45              | SLC9C2       |
| cg02178151 | 3.81E-09 | 1.82E-06 | 6.573631 | 14  | 25423086 | Body;Body;Body;Body;Body;Body;Body                                                | 95120    | STXBP6               | STXBP6       |
| cg18572214 | 3.82E-09 | 1.83E-06 | 6.572708 | 14  | 94423192 | 1stExon;Body                                                                      | 201      | ASB2                 | ASB2         |
| cg12494049 | 3.83E-09 | 1.83E-06 | 6.572399 | 10  | 44702818 |                                                                                   | -85379   |                      | C10orf142    |
| cg14793844 | 3.83E-09 | 1.83E-06 | 6.572385 | 2   | 1.01E+08 | Body;Body                                                                         | 205165   | AFF3                 | AFF3         |
| cg08895618 | 3.85E-09 | 1.84E-06 | 6.571092 | 5   | 1.5E+08  | Body;TSS1500                                                                      | -684     | NDST1                | NDST1        |
| cg21896720 | 3.88E-09 | 1.85E-06 | 6.569189 | 4   | 4673378  | Body                                                                              | 7326     | STX18-AS1            | SNORD162     |
| cg23108559 | 3.91E-09 | 1.86E-06 | 6.567473 | 14  | 55491009 | Body;Body;TSS5000;TSS5000                                                         | 2808     | WDHD1;SOCS4          | WDHD1        |
| cg14516350 | 3.91E-09 | 1.86E-06 | 6.567429 | 6   | 30166781 | 1stExon;1stExon                                                                   | 14402    | TRIM26               | TRIM26       |

| Probe      | p_adj    | q_val    | t        | Chr | Pos.hg19 | locations                                                                  | dist2TSS | gene.Illumina            | gene.nearest |
|------------|----------|----------|----------|-----|----------|----------------------------------------------------------------------------|----------|--------------------------|--------------|
| cg12000333 | 3.92E-09 | 1.86E-06 | 6.567311 | 17  | 14891737 |                                                                            | -42554   |                          | CDRT7        |
| cg08644365 | 3.93E-09 | 1.87E-06 | 6.566331 | 1   | 2.03E+08 | Body;Body;Body;Body                                                        | 23341    | ADORA1                   | ADORA1       |
| cg07469546 | 3.96E-09 | 1.88E-06 | 6.564666 | 16  | 86927990 |                                                                            | -163399  |                          | LINC02181    |
| cg17673769 | 3.98E-09 | 1.88E-06 | 6.563639 | 2   | 46707773 | Body                                                                       | 1070     | TMEM247                  | TMEM247      |
| cg02026049 | 3.98E-09 | 1.88E-06 | 6.563539 | 17  | 79049229 | Body;Body;Body;Body                                                        | 40279    | BAIAP2                   | BAIAP2       |
| cg10089457 | 4.03E-09 | 1.90E-06 | 6.560614 | 17  | 73499284 | TESS000;TESS000;TESS000;TESS000;TESS000;Body;Body                          | 4656     | TMEM94;MIR6785;CASKIN2   | MIR6785      |
| cg22259126 | 4.04E-09 | 1.90E-06 | 6.560097 | 6   | 32020750 | Body;Body                                                                  | -6845    | TNXB                     | TNXB         |
| cg19747745 | 4.05E-09 | 1.90E-06 | 6.55984  | 21  | 44817305 |                                                                            | 29706    |                          | SIK1         |
| cg00246969 | 4.05E-09 | 1.90E-06 | 6.559763 | 13  | 99159656 | Body;Body;Body                                                             | 14723    | STK24                    | STK24        |
| cg10097045 | 4.06E-09 | 1.90E-06 | 6.559383 | 1   | 55151051 | Body;Body;Body;Body;Body;Body;Body                                         | -30443   | MROH7;MROH7-TTC4         | TTC4         |
| cg08392325 | 4.06E-09 | 1.90E-06 | 6.559307 | 2   | 1.22E+08 | Body                                                                       | 14688    | GLI2                     | GLI2         |
| cg21838952 | 4.06E-09 | 1.90E-06 | 6.559138 | 15  | 64197566 | TESS000                                                                    | -22906   | DAPK2                    | LOC101928988 |
| cg00613113 | 4.06E-09 | 1.90E-06 | 6.558985 | 10  | 80720100 | Body;Body;Body                                                             | 107105   | ZMIZ1-AS1                | ZMIZ1-AS1    |
| cg25064458 | 4.06E-09 | 1.90E-06 | 6.558963 | 1   | 64086533 | Body;Body;TSS000                                                           | -2353    | PGM1                     | PGM1         |
| cg19705386 | 4.07E-09 | 1.90E-06 | 6.558811 | 2   | 1.76E+08 | TESS000;TESS000;TESS000;TESS000;TESS000                                    | -31391   | CHN1                     | CHRNA1       |
| cg25203481 | 4.09E-09 | 1.91E-06 | -6.55759 | 11  | 2891082  | TSS200                                                                     | -180     | KCNQ1DN                  | KCNQ1DN      |
| cg08223760 | 4.11E-09 | 1.91E-06 | 6.556551 | 1   | 43291209 | Body;TSS200                                                                | -39      | ERMAP                    | ERMAP        |
| cg05008843 | 4.11E-09 | 1.91E-06 | 6.556371 | 14  | 52622696 |                                                                            | -86919   |                          | NID2         |
| cg07521668 | 4.12E-09 | 1.91E-06 | 6.556099 | 11  | 63799381 | Body                                                                       | 46057    | MACROD1                  | OTUB1        |
| cg12679749 | 4.12E-09 | 1.91E-06 | 6.555967 | 4   | 81101251 |                                                                            | -5172    |                          | PRDM8        |
| cg09145900 | 4.12E-09 | 1.91E-06 | 6.555922 | 6   | 1.68E+08 | TSS1500                                                                    | -1494    | HGC6.3                   | HGC6.3       |
| cg00355799 | 4.13E-09 | 1.92E-06 | 6.555541 | 1   | 2.44E+08 | Body                                                                       | 28509    | LINC02774                | LINC02774    |
| cg25412641 | 4.14E-09 | 1.92E-06 | 6.55499  | 6   | 1.58E+08 | Body;Body                                                                  | -73043   | ZDHHC14                  | MIR3692      |
| cg13675957 | 4.16E-09 | 1.93E-06 | 6.553432 | 17  | 39672463 | Body;TESS000                                                               | 1006     | KRT15;MIR6510            | MIR6510      |
| cg06556929 | 4.19E-09 | 1.94E-06 | 6.552284 | 8   | 1.42E+08 | Body                                                                       | 9217     | GPR20                    | GPR20        |
| cg09689177 | 4.20E-09 | 1.94E-06 | 6.551768 | 5   | 55959580 |                                                                            | -57497   |                          | C5orf67      |
| cg23175130 | 4.20E-09 | 1.94E-06 | 6.551573 | 10  | 1.21E+08 | Body                                                                       | 29025    | GRK5                     | GRK5         |
| cg01566831 | 4.21E-09 | 1.94E-06 | 6.550782 | 17  | 80320602 | 3'UTR                                                                      | 3480     | TEX19                    | TEX19        |
| cg08374552 | 4.22E-09 | 1.95E-06 | 6.55051  | 5   | 1.11E+08 | Body                                                                       | 85579    | STARD4-AS1               | NREP         |
| cg03193299 | 4.23E-09 | 1.95E-06 | 6.549702 | 4   | 1167239  | TSS1500;TSS1500;Body                                                       | -240     | SPON2                    | SPON2        |
| cg19786808 | 4.24E-09 | 1.95E-06 | 6.549355 | 17  | 71431877 | Body                                                                       | -77944   | SDK2                     | LOC101928251 |
| cg24853340 | 4.26E-09 | 1.95E-06 | 6.548496 | 13  | 1.14E+08 | TESS000;TESS000                                                            | 76658    | ATP11A                   | MCF2L-AS1    |
| cg02575193 | 4.26E-09 | 1.95E-06 | 6.548369 | 11  | 6642908  | TSS000;3'UTR                                                               | -2255    | TPP1;DCHS1               | TPP1         |
| cg24227837 | 4.26E-09 | 1.95E-06 | 6.548283 | 13  | 26620952 | Body                                                                       | 4246     | SHISA2                   | SHISA2       |
| cg26219674 | 4.26E-09 | 1.95E-06 | 6.548135 | 1   | 1.55E+08 | Body;Body;Body;Body;Body                                                   | -80140   | KCNN3                    | ADAR         |
| cg21139713 | 4.28E-09 | 1.96E-06 | 6.547488 | 1   | 27675587 | Body;Body                                                                  | 7075     | SYTL1                    | SYTL1        |
| cg22811478 | 4.28E-09 | 1.96E-06 | 6.547147 | 7   | 1.12E+08 | Body;Body                                                                  | 57063    | DOCK4                    | DOCK4-AS1    |
| cg24317122 | 4.28E-09 | 1.96E-06 | 6.547036 | 11  | 1705432  | Body                                                                       | 1427     | FAM99B                   | FAM99B       |
| cg14418963 | 4.31E-09 | 1.96E-06 | 6.545941 | 10  | 1.31E+08 | Body                                                                       | 185258   | MGMT                     | MGMT         |
| cg13889750 | 4.33E-09 | 1.97E-06 | 6.544849 | 10  | 1.02E+08 |                                                                            | -35263   |                          | CPN1         |
| cg07133741 | 4.33E-09 | 1.97E-06 | 6.544596 | 20  | 55101981 | TSS1500;TESS000                                                            | -1000    | GCNT7;FAM209A            | GCNT7        |
| cg09761846 | 4.35E-09 | 1.98E-06 | 6.543663 | 11  | 57117162 | Body                                                                       | 11337    | P2RX3                    | P2RX3        |
| cg08128925 | 4.35E-09 | 1.98E-06 | 6.543553 | 19  | 11141458 | Body;Body;Body;Body;Body;Body;Body                                         | 46631    | SMARCA4                  | SMARCA4      |
| cg03055021 | 4.37E-09 | 1.98E-06 | 6.542673 | 1   | 15664770 | Body;Body;Body                                                             | 5609     | FHAD1;FHAD1-AS1          | FHAD1-AS1    |
| cg14788994 | 4.37E-09 | 1.98E-06 | 6.542581 | 17  | 8274570  | Body;Body                                                                  | 288      | KRBA2                    | KRBA2        |
| cg08106792 | 4.37E-09 | 1.98E-06 | 6.542512 | 1   | 1.54E+08 | TSS1500;TESS000                                                            | -856     | S100A6;S100A5            | S100A6       |
| cg03376089 | 4.41E-09 | 2.00E-06 | 6.540496 | 17  | 17839409 | Body;Body;Body;Body;Body;Body;Body;Body                                    | 36305    | TOM1L2                   | TOM1L2       |
| cg21748138 | 4.41E-09 | 2.00E-06 | 6.540396 | 2   | 1.74E+08 |                                                                            | 31952    |                          | CDCA7        |
| cg09231295 | 4.42E-09 | 2.00E-06 | 6.539953 | 1   | 58549612 | Body;Body                                                                  | 166563   | DAB1                     | DAB1         |
| cg25940827 | 4.43E-09 | 2.00E-06 | 6.539511 | 1   | 22182100 | Body;Body                                                                  | 43343    | HSPG2                    | LDLRAD2      |
| cg01765882 | 4.43E-09 | 2.00E-06 | 6.539354 | 12  | 1.32E+08 | Body                                                                       | 44479    | LINC01257                | LINC01257    |
| cg17793286 | 4.44E-09 | 2.00E-06 | 6.538904 | 17  | 18011879 | TESS000;TESS000;Body;TSS200                                                | -190     | DRG2;LOC105371566;MYO15A | MYO15A       |
| cg21896394 | 4.46E-09 | 2.01E-06 | 6.538053 | 8   | 1.29E+08 | Body                                                                       | 38079    | PVT1                     | MIR1207      |
| cg10835872 | 4.46E-09 | 2.01E-06 | 6.537951 | 19  | 13920075 | Body;Body                                                                  | 13819    | ZSWIM4                   | ZSWIM4       |
| cg20151452 | 4.52E-09 | 2.03E-06 | 6.534945 | 11  | 86290281 | Body;Body;Body;Body;Body;Body;Body;Body                                    | 92959    | ME3                      | ME3          |
| cg24539060 | 4.52E-09 | 2.03E-06 | 6.534898 | 17  | 76570762 | Body                                                                       | 2716     | DNAH17                   | DNAH17       |
| cg26982892 | 4.52E-09 | 2.03E-06 | 6.534832 | 7   | 1.12E+08 |                                                                            | 29046    |                          | LSMEM1       |
| cg27087650 | 4.55E-09 | 2.04E-06 | 6.533377 | 19  | 45255796 | Body                                                                       | 3832     | BCL3                     | BCL3         |
| cg01509809 | 4.55E-09 | 2.04E-06 | 6.533265 | 17  | 47284233 | Body;Body;Body;Body;TSS000;TSS000                                          | 2510     | GNGT2;ABI3               | GNGT2        |
| cg00317577 | 4.56E-09 | 2.04E-06 | 6.533054 | 15  | 83239908 | Body;Body;Body;Body;Body;Body;Body;Body;Body;Body;Body;Body;Body;Body;Body | 608      | CPEB1                    | CPEB1        |



| Probe      | p_adj    | q_val    | t        | Chr | Pos.hg19 | locations                                                                                                                                | dist2TSS | gene.Illumina          | gene.nearest |
|------------|----------|----------|----------|-----|----------|------------------------------------------------------------------------------------------------------------------------------------------|----------|------------------------|--------------|
| cg01938514 | 5.42E-09 | 2.28E-06 | 6.494134 | 16  | 18166238 |                                                                                                                                          | 263479   |                        | NP1A8        |
| cg07122319 | 5.44E-09 | 2.29E-06 | 6.493206 | 1   | 55227533 | Body                                                                                                                                     | 2663     | PARS2                  | PARS2        |
| cg11032634 | 5.48E-09 | 2.31E-06 | -6.49149 | 22  | 19929254 | TSS5000;1stExon;1stExon;Body;1stExon;TSS200;TSS200                                                                                       | -40      | TXNRD2;COMT            | COMT         |
| cg26013796 | 5.49E-09 | 2.31E-06 | 6.491341 | 12  | 46948457 | Body;Body;Body;Body;Body                                                                                                                 | 170568   | LOC100288798           | LOC100288798 |
| cg00974578 | 5.51E-09 | 2.31E-06 | 6.490444 | 6   | 1.44E+08 |                                                                                                                                          | -12831   |                        | PHACTR2      |
| cg13927938 | 5.52E-09 | 2.32E-06 | 6.489937 | 1   | 2.04E+08 | TSS200                                                                                                                                   | -110     | PIK3C2B                | PIK3C2B      |
| cg11771002 | 5.53E-09 | 2.32E-06 | 6.48952  | 5   | 1.13E+08 | Body;Body                                                                                                                                | 42004    | MCC                    | MCC          |
| cg22912101 | 5.53E-09 | 2.32E-06 | 6.489433 | 19  | 11918238 | 3'UTR                                                                                                                                    | -6849    | ZNF491                 | ZNF440       |
| cg14522150 | 5.57E-09 | 2.33E-06 | 6.487728 | 10  | 50616478 |                                                                                                                                          | -12343   |                        | DRGX         |
| cg04280548 | 5.61E-09 | 2.35E-06 | 6.486103 | 11  | 1.2E+08  | Body;Body                                                                                                                                | 6789     | TRIM29                 | TRIM29       |
| cg19698416 | 5.62E-09 | 2.35E-06 | 6.486048 | 15  | 73996268 | Body;Body;Body;Body                                                                                                                      | 19158    | CD276                  | CD276        |
| cg27664018 | 5.63E-09 | 2.35E-06 | 6.485657 | 16  | 57405979 | TSS1500;TSS1500                                                                                                                          | -422     | CX3CL1                 | CX3CL1       |
| cg02743895 | 5.64E-09 | 2.35E-06 | 6.485042 | 17  | 77394015 | Body;Body;Body                                                                                                                           | 84665    | RBFOX3                 | RBFOX3       |
| cg13324448 | 5.66E-09 | 2.36E-06 | 6.484338 | 3   | 40752056 |                                                                                                                                          | 185606   |                        | ZNF621       |
| cg01296230 | 5.68E-09 | 2.36E-06 | 6.483658 | 2   | 12894736 |                                                                                                                                          | 17244    |                        | MIR3125      |
| cg04409427 | 5.68E-09 | 2.36E-06 | 6.483632 | 21  | 35736023 | TSS1500                                                                                                                                  | -299     | KCNE2                  | KCNE2        |
| cg14305383 | 5.68E-09 | 2.36E-06 | 6.483557 | 9   | 1.32E+08 | TSS5000;TSS5000;TSS5000;TSS5000;TSS5000;TSS5000;TSS5000;TSS5000;TSS5000;TSS5000;Body;Body;3'UTR                                          | 4214     | NTMT1;ASB6             | ASB6         |
| cg26632171 | 5.68E-09 | 2.36E-06 | 6.483323 | 2   | 17997117 | TSS1500                                                                                                                                  | -609     | MSGN1                  | MSGN1        |
| cg18607580 | 5.70E-09 | 2.36E-06 | 6.482493 | 10  | 13542696 | Body;Body;Body;Body                                                                                                                      | 2280     | BEND7                  | BEND7        |
| cg27306680 | 5.72E-09 | 2.37E-06 | 6.481924 | 2   | 2.18E+08 |                                                                                                                                          | -18379   |                        | IGFBP5       |
| cg13166781 | 5.73E-09 | 2.37E-06 | 6.481476 | 7   | 45115954 | Body;3'UTR;3'UTR;3'UTR;3'UTR;3'UTR;TSS5000                                                                                               | 12614    | CCM2;NACAD             | NACAD        |
| cg05431171 | 5.73E-09 | 2.37E-06 | 6.481317 | 6   | 35461405 | Body;TSS5000;TSS5000                                                                                                                     | 3451     | TEAD3;TULP1            | TEAD3        |
| cg25768250 | 5.76E-09 | 2.38E-06 | 6.480309 | 1   | 2117733  | TSS5000;TSS5000;TSS5000;TSS5000;TSS5000;TSS5000;TSS5000;TSS5000;TSS5000;TSS5000;Body;Body;Body;Body;Body;TSS5000;TSS5000;TSS5000;TSS5000 | -2419    | PRKCZ;PRKCZ-AS1;FAAP20 | PRKCZ-AS1    |
| cg18471029 | 5.80E-09 | 2.39E-06 | 6.478929 | 6   | 1.37E+08 | Body;TSS5000                                                                                                                             | -3703    | MAP3K5;MAP3K5-AS1      | MAP3K5-AS1   |
| cg08156016 | 5.80E-09 | 2.39E-06 | 6.478866 | 15  | 62990470 | Body                                                                                                                                     | 50961    | TLN2                   | TLN2         |
| cg21178618 | 5.82E-09 | 2.40E-06 | 6.478127 | 14  | 1.01E+08 | TSS5000                                                                                                                                  | -3921    | MIR379                 | MIR379       |
| cg02196805 | 5.83E-09 | 2.40E-06 | 6.477702 | 5   | 1.31E+08 | 1stExon                                                                                                                                  | 156      | CSF2                   | CSF2         |
| cg03684886 | 5.83E-09 | 2.40E-06 | 6.477683 | 7   | 1.39E+08 | TSS1500;TSS1500                                                                                                                          | -1168    | KIAA1549               | KIAA1549     |
| cg10598353 | 5.86E-09 | 2.41E-06 | -6.47629 | 6   | 31783466 | TSS1500;5'UTR                                                                                                                            | 147      | HSPA1L;HSPA1A          | HSPA1A       |
| cg07316556 | 5.86E-09 | 2.41E-06 | 6.476281 | 2   | 1.01E+08 |                                                                                                                                          | -53017   |                        | NPAS2        |
| cg11805450 | 5.88E-09 | 2.41E-06 | -6.47581 | 11  | 1.23E+08 | Body;Body;Body;Body;Body;Body;Body                                                                                                       | 16872    | GRAMD1B                | GRAMD1B      |
| cg20601276 | 5.88E-09 | 2.41E-06 | 6.475787 | 20  | 36148133 | Body;Body;Body;Body;Body;Body;TSS5000;TSS5000;TSS5000                                                                                    | 572      | BLCAP;NNAT             | BLCAP        |
| cg13672547 | 5.89E-09 | 2.41E-06 | 6.475201 | 6   | 3562789  |                                                                                                                                          | -105996  |                        | SLC22A23     |
| cg16566595 | 5.91E-09 | 2.41E-06 | 6.474466 | 18  | 30090866 | TSS1500                                                                                                                                  | -759     | WBP11P1                | WBP11P1      |
| cg18053030 | 5.91E-09 | 2.41E-06 | 6.474424 | 6   | 47097679 |                                                                                                                                          | -87611   |                        | ADGRF1       |
| cg08808817 | 5.92E-09 | 2.41E-06 | 6.474285 | 17  | 72690539 | Body;3'UTR;3'UTR;3'UTR;3'UTR;3'UTR;3'UTR;Body                                                                                            | 18523    | RAB37;CD300LF          | CD300LF      |
| cg10896230 | 5.92E-09 | 2.41E-06 | 6.474235 | 8   | 11188675 | TSS5000;1stExon                                                                                                                          | 181      | MTMR9;SLC35G5          | SLC35G5      |
| cg23689441 | 5.93E-09 | 2.42E-06 | 6.473594 | 1   | 1248347  | TSS5000;TSS5000;TSS5000;Body;Body;Body;Body;TSS1500                                                                                      | -401     | PUSL1;INTS11;MIR6727   | MIR6727      |
| cg10702457 | 5.94E-09 | 2.42E-06 | 6.473529 | 4   | 88753179 | Body;TSS1500;TSS1500;TSS1500;TSS1500;TSS5000                                                                                             | -941     | MEPE                   | MEPE         |
| cg14374781 | 5.94E-09 | 2.42E-06 | 6.473271 | 1   | 17739956 | Body;Body                                                                                                                                | 25076    | RCC2                   | RCC2         |
| cg04970014 | 5.95E-09 | 2.42E-06 | 6.473043 | 22  | 49043384 | Body;Body                                                                                                                                | 71233    | TAF45                  | TAF45        |
| cg14248981 | 5.97E-09 | 2.42E-06 | 6.472168 | 6   | 31937066 | Body;TSS5000;TSS5000;TSS5000;TSS5000;TSS5000                                                                                             | -1885    | SKIV2L;DXO;STK19       | STK19        |
| cg02271490 | 5.99E-09 | 2.43E-06 | 6.471579 | 7   | 1.39E+08 | Body;Body                                                                                                                                | -68964   | KIAA1549               | ATP6V0A4     |
| cg16396153 | 5.99E-09 | 2.43E-06 | 6.471396 | 14  | 1.05E+08 | Body;Body                                                                                                                                | 17639    | AHNAK2                 | AHNAK2       |
| cg17602885 | 6.01E-09 | 2.43E-06 | 6.470582 | 1   | 9804627  | Body;Body;Body                                                                                                                           | 53103    | CLSTN1                 | PIK3CD       |
| cg21384114 | 6.06E-09 | 2.45E-06 | 6.468895 | 17  | 80320037 | 1stExon                                                                                                                                  | 2915     | TEX19                  | TEX19        |
| cg24838864 | 6.08E-09 | 2.46E-06 | 6.468115 | 19  | 11598009 | Body                                                                                                                                     | -6148    | ZNF653                 | ELAVL3       |
| cg05642993 | 6.10E-09 | 2.46E-06 | 6.46742  | 4   | 1.19E+08 |                                                                                                                                          | 67269    |                        | LINC02264    |
| cg21728844 | 6.10E-09 | 2.46E-06 | 6.467251 | 2   | 2.34E+08 | Body;Body                                                                                                                                | 9195     | NGEF                   | SNORC        |
| cg00240378 | 6.15E-09 | 2.47E-06 | 6.465562 | 2   | 8850020  |                                                                                                                                          | 27835    |                        | ID2          |
| cg15549029 | 6.15E-09 | 2.47E-06 | 6.465539 | 5   | 1.38E+08 | TSS5000                                                                                                                                  | -3689    | GFRA3                  | GFRA3        |
| cg09359750 | 6.15E-09 | 2.47E-06 | 6.465506 | 3   | 58708188 |                                                                                                                                          | -55687   |                        | FAM3D        |
| cg27045264 | 6.15E-09 | 2.47E-06 | 6.465349 | 16  | 31441954 | TSS5000;TSS5000;TSS5000;TSS5000;TSS5000                                                                                                  | -2273    | ITGAD;COX6A2;ZNF843    | COX6A2       |
| cg26886231 | 6.16E-09 | 2.47E-06 | 6.465173 | 17  | 78936889 | Body;Body;TSS5000                                                                                                                        | 8124     | RPTOR;LOC400627        | LOC400627    |
| cg07783183 | 6.16E-09 | 2.47E-06 | 6.465119 | 11  | 75852355 | Body                                                                                                                                     | 65191    | UVRAG                  | WNT11        |
| cg12117975 | 6.17E-09 | 2.47E-06 | 6.464682 | 15  | 95577957 |                                                                                                                                          | 179366   |                        | LOC440311    |
| cg06127781 | 6.20E-09 | 2.48E-06 | 6.463675 | 16  | 15240413 |                                                                                                                                          | 8446     |                        | MIR3180-4    |
| cg21767191 | 6.20E-09 | 2.48E-06 | 6.463591 | 3   | 17082105 | Body;Body                                                                                                                                | 107418   | PLCL2                  | MIR3714      |
| cg02973377 | 6.21E-09 | 2.48E-06 | 6.463234 | 19  | 15342548 | Body;Body                                                                                                                                | 711      | EPHX3                  | EPHX3        |

| Probe      | p_adj    | q_val    | t        | Chr | Pos.hg19 | locations                                           | dist2TSS | gene.Illumina              | gene.nearest |
|------------|----------|----------|----------|-----|----------|-----------------------------------------------------|----------|----------------------------|--------------|
| cg07453911 | 6.24E-09 | 2.49E-06 | 6.462387 | 19  | 19645610 | Body;Body;TSS5000                                   | -3463    | YJEFN3;CILP2               | CILP2        |
| cg02261294 | 6.24E-09 | 2.49E-06 | 6.462382 | 5   | 1.78E+08 | Body;Body;Body;Body;Body;Body                       | 4548     | HNRNPAB;PHYKPL             | HNRNPAB      |
| cg14157417 | 6.24E-09 | 2.49E-06 | 6.462345 | 7   | 1.58E+08 | Body;Body;Body;Body;Body                            | 60020    | PTPRN2                     | MIR595       |
| cg17810966 | 6.26E-09 | 2.49E-06 | 6.461534 | 4   | 95460771 | Body;Body;Body;Body;Body;Body;Body                  | 87679    | PDLIM5                     | PDLIM5       |
| cg11876177 | 6.27E-09 | 2.49E-06 | 6.4613   | 6   | 25874121 | Body;Body                                           | 350      | SLC17A3                    | SLC17A3      |
| cg20839145 | 6.28E-09 | 2.49E-06 | 6.460907 | 3   | 1.24E+08 | Body;Body;Body;Body;Body                            | 75082    | MYLK                       | MYLK         |
| cg01590076 | 6.28E-09 | 2.49E-06 | 6.460801 | 8   | 70246362 |                                                     | 114117   |                            | LINC01603    |
| cg11374169 | 6.29E-09 | 2.50E-06 | 6.460491 | 2   | 2.08E+08 |                                                     | -96425   |                            | CREB1        |
| cg21368479 | 6.30E-09 | 2.50E-06 | 6.459966 | 6   | 1.49E+08 |                                                     | -61221   |                            | LOC105378047 |
| cg26815611 | 6.31E-09 | 2.50E-06 | 6.459861 | 19  | 13919905 | Body;Body                                           | 13649    | ZSWIM4                     | ZSWIM4       |
| cg10973789 | 6.34E-09 | 2.50E-06 | 6.458739 | 11  | 1.16E+08 |                                                     | 71726    |                            | LOC101928985 |
| cg13256308 | 6.34E-09 | 2.50E-06 | 6.458734 | 14  | 93106286 | Body;Body                                           | 63708    | RIN3                       | RIN3         |
| cg00491335 | 6.34E-09 | 2.50E-06 | 6.458678 | 2   | 2.25E+08 | TSS5000;TSS5000;TSS5000                             | -3355    | AP1S3                      | AP1S3        |
| cg05740739 | 6.36E-09 | 2.51E-06 | 6.457807 | 2   | 2.41E+08 | TSS1500                                             | -1162    | OR6B3                      | OR6B3        |
| cg11971918 | 6.37E-09 | 2.51E-06 | 6.457484 | 11  | 1.11E+08 | Body;Body;Body;Body                                 | 15831    | LAYN                       | LAYN         |
| cg11332681 | 6.39E-09 | 2.52E-06 | 6.456819 | 1   | 2.23E+08 | Body;Body                                           | -18045   | DISP1                      | DISP1        |
| cg24030037 | 6.42E-09 | 2.53E-06 | 6.45583  | 8   | 27457282 | Body;Body;Body                                      | 10986    | CLU                        | MIR6843      |
| cg03474702 | 6.43E-09 | 2.53E-06 | 6.455498 | 18  | 12030535 | 3'UTR                                               | 49030    | IMPA2                      | IMPA2        |
| cg09534489 | 6.43E-09 | 2.53E-06 | 6.455498 | 16  | 1609908  | Body;TESS000;TESS000                                | -20619   | IFT140;TMEM204             | LOC105371046 |
| cg23468144 | 6.43E-09 | 2.53E-06 | 6.455293 | 19  | 1322527  |                                                     | -32430   |                            | PWWP3A       |
| cg00906476 | 6.44E-09 | 2.53E-06 | 6.4551   | 5   | 1.39E+08 | Body;Body;Body;Body;Body;Body;Body;Body             | 7061     | CXXC5                      | CXXC5        |
| cg22379463 | 6.47E-09 | 2.53E-06 | 6.454239 | 3   | 45260330 |                                                     | 7449     |                            | TMEM158      |
| cg14932952 | 6.47E-09 | 2.53E-06 | 6.454037 | 3   | 1.88E+08 | Body;5'UTR;5'UTR                                    | 90       | LPP                        | LPP          |
| cg16682721 | 6.48E-09 | 2.53E-06 | 6.453573 | 11  | 71931577 | Body;Body;Body;Body;TSS5000                         | 3740     | FOLR2;INPL1                | FOLR2        |
| cg10163220 | 6.49E-09 | 2.53E-06 | 6.453386 | 12  | 1.05E+08 |                                                     | -74640   |                            | CHST11       |
| cg01803856 | 6.49E-09 | 2.53E-06 | 6.453312 | 17  | 650796   | TESS000;TESS000;TESS000;TESS000;Body;TSS5000        | 4708     | TLCD3A;GEMIN4;DBILSP       | GEMIN4       |
| cg13485481 | 6.49E-09 | 2.53E-06 | 6.45321  | 7   | 2186344  | Body;Body;Body;Body;Body                            | -57657   | MAD1L1                     | SNORA114     |
| cg25827873 | 6.52E-09 | 2.54E-06 | 6.45242  | 8   | 593655   | Body                                                | 87569    | ERICH1                     | ERICH1       |
| cg06807993 | 6.52E-09 | 2.54E-06 | 6.452279 | 17  | 79099785 | Body;Body;TSS1500;TESS000;TSS200                    | -36      | AATK;MIR657;MIR3065;MIR338 | MIR338       |
| cg14989351 | 6.53E-09 | 2.54E-06 | 6.452024 | 14  | 83282545 |                                                     | 173570   |                            | LINC02301    |
| cg01995099 | 6.53E-09 | 2.54E-06 | 6.451993 | 22  | 42394048 | 3'UTR;3'UTR;3'UTR;TSS1500                           | -743     | SEPTIN3;WBP2NL             | WBP2NL       |
| cg21465236 | 6.53E-09 | 2.54E-06 | 6.451926 | 2   | 1933212  | Body;Body;Body;Body;Body;Body;Body;Body             | -184925  | MYT1L                      | PXDN         |
| cg00945260 | 6.56E-09 | 2.54E-06 | 6.450983 | 16  | 1104925  |                                                     | -17830   |                            | SSTR5        |
| cg14497545 | 6.56E-09 | 2.54E-06 | 6.450955 | 4   | 1.41E+08 | Body                                                | 167503   | MAML3                      | MGST2        |
| cg19835040 | 6.56E-09 | 2.54E-06 | 6.45079  | 3   | 46538742 | TSS1500                                             | -723     | RTP3                       | RTP3         |
| cg00762830 | 6.56E-09 | 2.54E-06 | 6.450777 | 16  | 88990161 | Body;Body                                           | -16283   | CBFA2T3                    | LOC100129697 |
| cg18063824 | 6.60E-09 | 2.55E-06 | 6.44964  | 4   | 54075042 | Body                                                | 157186   | SCFD2                      | SCFD2        |
| cg12412384 | 6.61E-09 | 2.55E-06 | 6.449395 | 12  | 12673025 | Body                                                | 42772    | DUSP16                     | DUSP16       |
| cg17750946 | 6.62E-09 | 2.55E-06 | 6.448915 | 10  | 1.35E+08 | Body;Body                                           | 40014    | INPP5A                     | NKX6-2       |
| cg05245416 | 6.62E-09 | 2.55E-06 | 6.448888 | 2   | 1.05E+08 | Body                                                | 36206    | LINC01102                  | LINC01102    |
| cg23325999 | 6.63E-09 | 2.56E-06 | 6.448479 | 19  | 5217431  | Body;Body;Body;Body                                 | 123392   | PTPRS                      | PTPRS        |
| cg26191586 | 6.68E-09 | 2.57E-06 | 6.446981 | 1   | 53794760 | TSS1500;TSS1500;TSS1500;TSS1500;Body                | 856      | LRP8;LINC01771             | LINC01771    |
| cg13856573 | 6.69E-09 | 2.58E-06 | 6.446477 | 11  | 62475078 | TSS1500;TSS1500;5'UTR;Body;Body;Body;TSS200         | -69      | BSCL2;HNRNPUL2-BSCL2;GNG3  | GNG3         |
| cg08926040 | 6.71E-09 | 2.58E-06 | 6.445821 | 11  | 8638598  | 3'UTR                                               | -22823   | TRIM66                     | STK33        |
| cg10891959 | 6.74E-09 | 2.59E-06 | 6.444695 | 13  | 81432486 |                                                     | -160039  |                            | LINC00377    |
| cg17044090 | 6.75E-09 | 2.59E-06 | 6.444443 | 1   | 2.48E+08 |                                                     | -28572   |                            | NLRP3        |
| cg19596509 | 6.76E-09 | 2.59E-06 | 6.443997 | 3   | 1.84E+08 | TSS1500;TSS5000                                     | -1366    | LINC01840;EPHB3            | LINC01840    |
| cg17095916 | 6.78E-09 | 2.60E-06 | 6.443528 | 12  | 56226873 | TSS5000;Body;Body;Body;Body;TESS000;TESS000;TESS000 | -3453    | DNAJC14;TMEM198B;MMP19     | DNAJC14      |
| cg16298761 | 6.78E-09 | 2.60E-06 | 6.44342  | 8   | 1.45E+08 | Body                                                | 7181     | WDR97                      | WDR97        |
| cg06908450 | 6.79E-09 | 2.60E-06 | 6.443123 | 17  | 79921870 | TSS5000                                             | -2807    | NOTUM                      | NOTUM        |
| cg06093201 | 6.80E-09 | 2.60E-06 | 6.44288  | 16  | 1405095  | TSS5000;Body                                        | 3164     | TSR3;GNPTG                 | GNPTG        |
| cg23393549 | 6.80E-09 | 2.60E-06 | 6.442742 | 5   | 54058686 |                                                     | -18600   |                            | LOC102467080 |
| cg01591973 | 6.81E-09 | 2.60E-06 | 6.442595 | 19  | 37583283 | Body;Body;Body;Body;Body;Body;Body;Body             | 13949    | ZNF420                     | ZNF420       |
| cg21661864 | 6.83E-09 | 2.60E-06 | 6.441917 | 2   | 2.41E+08 |                                                     | -84746   |                            | LOC150935    |
| cg05785100 | 6.86E-09 | 2.61E-06 | 6.44099  | 6   | 1.69E+08 | Body;Body                                           | 79374    | SMOC2                      | SMOC2        |
| cg20685981 | 6.91E-09 | 2.63E-06 | 6.439253 | 19  | 42871187 | Body;Body                                           | 15905    | MEGF8                      | MIR8077      |
| cg11390378 | 6.92E-09 | 2.63E-06 | 6.438845 | 4   | 1.48E+08 |                                                     | 16183    |                            | POU4F2       |
| cg26506947 | 6.92E-09 | 2.63E-06 | 6.438714 | 16  | 25228688 | Body                                                | 421      | AQP8                       | AQP8         |
| cg14760438 | 6.93E-09 | 2.63E-06 | 6.438493 | 6   | 33409448 | Body;Body;TESS000                                   | 3341     | SYNGAP1;MIR5004            | MIR5004      |
| cg01624504 | 6.93E-09 | 2.63E-06 | 6.438405 | 13  | 25643386 |                                                     | -26889   |                            | PABPC3       |

| Probe      | p_adj    | q_val    | t        | Chr | Pos.hg19 | locations                                                                     | dist2TSS | gene.Illumina                             | gene.nearest |
|------------|----------|----------|----------|-----|----------|-------------------------------------------------------------------------------|----------|-------------------------------------------|--------------|
| cg02634641 | 6.94E-09 | 2.63E-06 | 6.438223 | 1   | 16369395 | TSS1500                                                                       | -881     | CLCNKB                                    | CLCNKB       |
| cg18674466 | 6.94E-09 | 2.63E-06 | 6.438168 | 3   | 9400729  | TSS5000;TSS5000                                                               | -4008    | THUMPD3                                   | THUMPD3      |
| cg09298818 | 6.96E-09 | 2.63E-06 | 6.437572 | 12  | 1.11E+08 | TSS1500;TSS1500                                                               | -850     | PPP1CC                                    | PPP1CC       |
| cg09416203 | 6.96E-09 | 2.63E-06 | 6.437436 | 7   | 94928249 | TESS000;TESS000;TESS000;TESS000;3'UTR                                         | 25595    | PPP1R9A;PON1                              | PON1         |
| cg19902593 | 7.02E-09 | 2.65E-06 | 6.435505 | 1   | 56038708 |                                                                               | 347395   | MIR4422                                   | MIR4422      |
| cg14570531 | 7.03E-09 | 2.65E-06 | 6.435262 | 6   | 32168751 | Body;Body;Body                                                                | -5451    | NOTCH4                                    | GPSM3        |
| cg08200856 | 7.05E-09 | 2.66E-06 | 6.434626 | 8   | 1.44E+08 | TESS000;Body                                                                  | 9476     | ZFP41                                     | ZFP41        |
| cg00402366 | 7.07E-09 | 2.66E-06 | -6.43416 | 1   | 74663750 | 5'UTR;5'UTR;TSS200;TSS200;TSS200;TSS200                                       | 110      | LRRIQ3;FPGT;FPGT-TNNI3K                   | LRRIQ3       |
| cg23033024 | 7.12E-09 | 2.68E-06 | 6.432538 | 20  | 23472484 | 1stExon;1stExon                                                               | 731      | CST8                                      | CST8         |
| cg13968099 | 7.13E-09 | 2.68E-06 | -6.43209 | 5   | 1.63E+08 | 5'UTR;5'UTR;Body;5'UTR;5'UTR;5'UTR;5'UTR;Body;Body;Body;Body;Body;5'UTR;5'UTR | 168      | CCNG1                                     | CCNG1        |
| cg14336112 | 7.15E-09 | 2.69E-06 | 6.431466 | 15  | 77645762 | Body                                                                          | 66684    | PEAK1                                     | PEAK1        |
| cg26785882 | 7.17E-09 | 2.69E-06 | 6.430698 | 3   | 1.78E+08 |                                                                               | -14064   |                                           | LINC02015    |
| cg13379822 | 7.19E-09 | 2.69E-06 | 6.43027  | 12  | 54816219 | Body;Body;TSS5000;Body                                                        | 2651     | LOC102724050;ITGA5                        | LOC102724050 |
| cg00933415 | 7.19E-09 | 2.69E-06 | 6.43025  | 6   | 33135453 | Body;Body;Body                                                                | 24353    | COL11A2                                   | HCG24        |
| cg09430586 | 7.19E-09 | 2.69E-06 | 6.43007  | 19  | 54242124 | TESS000;TESS000;TSS1500;TSS5000;TSS5000                                       | -462     | MIR518D;MIR516B1;MIR518A2;MIR517C;MIR520H | MIR518A2     |
| cg09433131 | 7.20E-09 | 2.70E-06 | 6.429786 | 8   | 73480179 | 1stExon                                                                       | 30720    | KCNB2                                     | KCNB2        |
| cg19817126 | 7.21E-09 | 2.70E-06 | 6.429612 | 10  | 93357526 | Body                                                                          | 13691    | HECTD2-AS1                                | HECTD2-AS1   |
| cg01827999 | 7.22E-09 | 2.70E-06 | 6.429354 | 17  | 17791914 | Body;Body;Body;Body;Body;Body;Body;Body                                       | -51589   | TOM1L2                                    | SREBF1       |
| cg06234941 | 7.25E-09 | 2.71E-06 | 6.428299 | 3   | 1.94E+08 | Body;Body;Body;Body                                                           | 20072    | TMEM44                                    | TMEM44-AS1   |
| cg17944981 | 7.26E-09 | 2.71E-06 | 6.427934 | 13  | 94461196 | Body                                                                          | 49530    | GPC6                                      | GPC6-AS2     |
| cg03037969 | 7.27E-09 | 2.71E-06 | 6.427743 | 20  | 1277814  | Body;Body                                                                     | 16503    | SNPH                                      | SDCBP2       |
| cg25974167 | 7.29E-09 | 2.71E-06 | 6.427226 | 3   | 1.28E+08 | Body                                                                          | -20579   | EEFSEC                                    | RUVBL1       |
| cg14437072 | 7.30E-09 | 2.71E-06 | 6.426911 | 8   | 1.44E+08 | Body                                                                          | 10085    | RHPN1                                     | RHPN1        |
| cg08355099 | 7.32E-09 | 2.72E-06 | 6.426097 | 1   | 2.04E+08 | Body                                                                          | -41704   | PLEKHA6                                   | GOLT1A       |
| cg16095411 | 7.33E-09 | 2.72E-06 | 6.425916 | 17  | 55762444 | TESS000;TESS000                                                               | 60216    | MSI2                                      | CCDC182      |
| cg19539519 | 7.34E-09 | 2.73E-06 | 6.425414 | 17  | 26553687 | Body                                                                          | 99       | PYY2                                      | PYY2         |
| cg02424569 | 7.36E-09 | 2.73E-06 | 6.425039 | 3   | 14851410 | Body                                                                          | 1511     | LINC02011                                 | LINC02011    |
| cg22143209 | 7.36E-09 | 2.73E-06 | 6.424789 | 7   | 4254977  | Body;Body                                                                     | -80508   | SDK1                                      | LOC105375131 |
| cg11582369 | 7.38E-09 | 2.73E-06 | 6.424439 | 1   | 43788427 | 3'UTR;3'UTR                                                                   | -15061   | TIE1                                      | MPL          |
| cg11295935 | 7.38E-09 | 2.73E-06 | 6.424254 | 3   | 87018446 | Body;Body;Body                                                                | 21853    | VGLL3                                     | VGLL3        |
| cg00880872 | 7.39E-09 | 2.73E-06 | 6.424001 | 9   | 1.25E+08 |                                                                               | -5372    |                                           | MIR4478      |
| cg16811443 | 7.39E-09 | 2.73E-06 | 6.423998 | 17  | 20517129 | Body                                                                          | 19435    | LINC02088                                 | LINC02088    |
| cg14101380 | 7.39E-09 | 2.73E-06 | 6.423894 | 11  | 70718575 | Body;TSS200                                                                   | -102     | SHANK2;MIR3664                            | MIR3664      |
| cg24150157 | 7.41E-09 | 2.73E-06 | 6.423252 | 19  | 51891210 | 5'UTR;5'UTR;TESS000;TESS000                                                   | 18       | LIM2;C19orf84                             | LIM2         |
| cg12848315 | 7.49E-09 | 2.76E-06 | 6.420959 | 14  | 76479761 | Body;Body;Body;Body;Body                                                      | 27656    | IFT43                                     | IFT43        |
| cg20847325 | 7.49E-09 | 2.76E-06 | 6.420887 | 1   | 64148960 |                                                                               | 60074    |                                           | PGM1         |
| cg18833133 | 7.50E-09 | 2.76E-06 | 6.420708 | 8   | 1.2E+08  | Body;Body;Body;Body;Body                                                      | -15847   | SAMD12                                    | SAMD12       |
| cg20784098 | 7.54E-09 | 2.77E-06 | 6.419349 | 1   | 32157059 | Body                                                                          | 12559    | COL16A1                                   | COL16A1      |
| cg17329004 | 7.55E-09 | 2.77E-06 | 6.419236 | 19  | 49714934 | 3'UTR;3'UTR;3'UTR;3'UTR;3'UTR;3'UTR                                           | 53886    | TRPM4                                     | TRPM4        |
| cg07347049 | 7.56E-09 | 2.77E-06 | 6.41888  | 13  | 1.14E+08 | TSS5000;Body;Body                                                             | 3993     | MCF2L-AS1;MCF2L                           | MCF2L        |
| cg18249908 | 7.57E-09 | 2.78E-06 | 6.418416 | 8   | 22864325 | Body;Body;Body                                                                | 7234     | RHOBTB2                                   | RHOBTB2      |
| cg00394718 | 7.58E-09 | 2.78E-06 | 6.418356 | 8   | 1.21E+08 | Body                                                                          | 709      | ENPP2                                     | ENPP2        |
| cg09466667 | 7.60E-09 | 2.78E-06 | 6.417665 | 3   | 42140775 | Body;Body;Body;Body;Body                                                      | 7927     | TRAK1                                     | TRAK1        |
| cg10841540 | 7.61E-09 | 2.78E-06 | 6.417279 | 14  | 59907007 |                                                                               | 25091    |                                           | GPR135       |
| cg06704466 | 7.62E-09 | 2.78E-06 | 6.417011 | 2   | 2.37E+08 | Body;Body                                                                     | 66772    | AGAP1                                     | GBX2         |
| cg14588828 | 7.63E-09 | 2.78E-06 | 6.416627 | 9   | 1.17E+08 | Body;Body;Body                                                                | 16383    | AKNA                                      | ORM2         |
| cg02660541 | 7.64E-09 | 2.78E-06 | 6.416483 | 16  | 3193410  | TESS000;TESS000;TESS000;TSS1500                                               | -881     | ZNF213;CASP16P                            | CASP16P      |
| cg27117439 | 7.64E-09 | 2.78E-06 | 6.416392 | 2   | 33151557 | Body;Body;TSS1500                                                             | -636     | LINC00486                                 | LINC00486    |
| cg21706038 | 7.65E-09 | 2.78E-06 | 6.416313 | 2   | 3317693  | Body;Body;Body                                                                | 63896    | EIPR1                                     | EIPR1        |
| cg17191518 | 7.68E-09 | 2.79E-06 | 6.415345 | 15  | 52468850 | Body;Body;TSS5000                                                             | 3272     | GNB5;CERNA1                               | GNB5         |
| cg25540579 | 7.68E-09 | 2.79E-06 | -6.41533 | 19  | 1653193  | TSS1500;TSS1500;TSS1500;TSS1500                                               | -579     | TCF3                                      | TCF3         |
| cg15021658 | 7.70E-09 | 2.80E-06 | 6.414673 | 11  | 61249826 | Body;Body                                                                     | 1235     | PPP1R32                                   | PPP1R32      |
| cg24060938 | 7.70E-09 | 2.80E-06 | 6.414617 | 7   | 1.3E+08  | Body                                                                          | 497      | CPA2                                      | CPA2         |
| cg02434866 | 7.71E-09 | 2.80E-06 | 6.414343 | 16  | 88964786 | Body;Body                                                                     | 14864    | CBFA2T3                                   | LOC101927793 |
| cg15894581 | 7.74E-09 | 2.80E-06 | 6.41354  | 15  | 63889406 | TESS000;TESS000;TESS000;TESS000;Body;TSS200;TSS200;TSS200;TSS200              | -179     | USP3;USP3-AS1;FBXL22                      | FBXL22       |
| cg01895989 | 7.74E-09 | 2.80E-06 | 6.413391 | 16  | 58166238 | TSS5000;TSS5000                                                               | -2909    | CFAP20                                    | CFAP20       |
| cg02857384 | 7.75E-09 | 2.80E-06 | 6.413253 | 16  | 89332300 | TESS000;TESS000;TESS000                                                       | -30235   | ANKRD11                                   | LOC105371414 |
| cg14091531 | 7.77E-09 | 2.81E-06 | 6.412536 | 1   | 13881461 |                                                                               | -28790   |                                           | PDPN         |
| cg13274775 | 7.77E-09 | 2.81E-06 | 6.412518 | 6   | 74078997 | Body                                                                          | 518      | OOEP                                      | OOEP         |

| Probe      | p_adj    | q_val    | t        | Chr | Pos.hg19 | locations                                                                                                | dist2TSS | gene.Illumina                                   | gene.nearest |
|------------|----------|----------|----------|-----|----------|----------------------------------------------------------------------------------------------------------|----------|-------------------------------------------------|--------------|
| cg13810766 | 7.78E-09 | 2.81E-06 | 6.412468 | 7   | 1.52E+08 | Body                                                                                                     | -30495   | PRKAG2                                          | PRKAG2       |
| cg22838399 | 7.78E-09 | 2.81E-06 | 6.41238  | 5   | 1.07E+08 | Body                                                                                                     | 93853    | EFNA5                                           | EFNA5        |
| cg06136617 | 7.78E-09 | 2.81E-06 | 6.412249 | 16  | 4027502  | Body                                                                                                     | -27057   | ADCY9                                           | LINC02861    |
| cg07492281 | 7.80E-09 | 2.81E-06 | 6.411873 | 7   | 966947   | TSS200;Body;Body;Body                                                                                    | -95      | ADAP1                                           | ADAP1        |
| cg09529165 | 7.81E-09 | 2.81E-06 | 6.411372 | 17  | 45808345 | TSS5000                                                                                                  | -2256    | TBX21                                           | TBX21        |
| cg21211321 | 7.82E-09 | 2.81E-06 | 6.41112  | 11  | 1.34E+08 | Body                                                                                                     | 10449    | IGSF9B                                          | IGSF9B       |
| cg21113603 | 7.84E-09 | 2.81E-06 | 6.410751 | 19  | 34306891 | TSS5000;TSS5000;TSS5000                                                                                  | 19117    | KCTD15                                          | KCTD15       |
| cg03445173 | 7.86E-09 | 2.82E-06 | 6.409971 | 2   | 17998337 | 1stExon                                                                                                  | 611      | MSGN1                                           | MSGN1        |
| cg13748657 | 7.87E-09 | 2.82E-06 | 6.409887 | 17  | 80973520 | Body;Body;Body                                                                                           | -8647    | B3GNTL1                                         | B3GNTL1      |
| cg24615251 | 7.87E-09 | 2.82E-06 | 6.40975  | 17  | 32683481 | TSS200;TSS5000                                                                                           | -17      | CCL13;CCL1                                      | CCL13        |
| cg19478343 | 7.91E-09 | 2.83E-06 | 6.408503 | 20  | 49620679 | Body                                                                                                     | 18965    | KCNG1                                           | KCNG1        |
| cg00339012 | 7.92E-09 | 2.83E-06 | 6.408214 | 2   | 5865442  |                                                                                                          | 32927    |                                                 | SOX11        |
| cg23208881 | 7.95E-09 | 2.84E-06 | 6.407506 | 15  | 91411495 | TSS1500;TSS5000;TSS5000                                                                                  | -322     | FURIN                                           | FURIN        |
| cg20638429 | 7.96E-09 | 2.84E-06 | 6.407248 | 22  | 24979642 | TSS200;TSS5000                                                                                           | -75      | GGT1;LRRC75B                                    | GGT1         |
| cg14508832 | 7.98E-09 | 2.85E-06 | 6.406724 | 1   | 2404894  | Body;TSS5000;TSS5000                                                                                     | -2833    | PLCH2                                           | PLCH2        |
| cg06905155 | 8.02E-09 | 2.86E-06 | 6.40543  | 2   | 2.41E+08 | TSS5000                                                                                                  | 39393    | LOC150935                                       | LOC150935    |
| cg05708396 | 8.03E-09 | 2.86E-06 | 6.405241 | 7   | 47531340 | Body                                                                                                     | -26939   | TNS3                                            | SNORD151     |
| cg03072483 | 8.06E-09 | 2.87E-06 | 6.40427  | 17  | 78327711 | Body;Body                                                                                                | -61255   | RNF213;RNF213-AS1                               | ENDOV        |
| cg13789881 | 8.08E-09 | 2.87E-06 | 6.403809 | 2   | 86094755 | 5'UTR;Body;Body;Body;Body;Body;Body;Body;Body;Body;Body;Body                                             | 38       | ST3GAL5                                         | ST3GAL5      |
| cg11393040 | 8.09E-09 | 2.88E-06 | 6.403371 | 1   | 47907054 | TSS5000;TSS5000                                                                                          | 3339     | LINC01389;FOXO2                                 | FOXO2        |
| cg18589874 | 8.11E-09 | 2.88E-06 | 6.403017 | 11  | 47608310 | TSS5000;5'UTR;5'UTR;5'UTR;5'UTR;TSS5000                                                                  | 108      | NDUFS3;FAM180B;C1QTNF4                          | FAM180B      |
| cg05338567 | 8.12E-09 | 2.88E-06 | 6.402795 | 6   | 31859187 | Body;Body;Body;Body;Body                                                                                 | 5579     | EHMT2                                           | EHMT2        |
| cg01118569 | 8.13E-09 | 2.88E-06 | 6.402387 | 5   | 1.24E+08 |                                                                                                          | -138107  |                                                 | ZNF608       |
| cg11344073 | 8.15E-09 | 2.89E-06 | 6.401726 | 2   | 37376067 | 5'UTR;TSS1500;5'UTR                                                                                      | -1102    | EIF2AK2                                         | EIF2AK2      |
| cg00629117 | 8.16E-09 | 2.89E-06 | 6.401574 | 16  | 1844932  | TSS1500;TSS1500;TSS200                                                                                   | -23      | IGFALS                                          | IGFALS       |
| cg24048650 | 8.17E-09 | 2.89E-06 | 6.401339 | 21  | 47828142 | Body;Body                                                                                                | -50661   | PCNT                                            | DIP2A        |
| cg26176014 | 8.18E-09 | 2.89E-06 | 6.40102  | 17  | 80491645 | Body                                                                                                     | 14038    | FOXK2                                           | FOXK2        |
| cg24492694 | 8.18E-09 | 2.89E-06 | 6.401009 | 11  | 2595605  | Body;Body                                                                                                | 112922   | KCNQ1                                           | KCNQ1        |
| cg13580755 | 8.19E-09 | 2.89E-06 | 6.400647 | 6   | 1.67E+08 | Body;Body;Body;Body;Body                                                                                 | -13088   | RPS6KA2                                         | RPS6KA2-IT1  |
| cg25029562 | 8.20E-09 | 2.89E-06 | 6.400327 | 4   | 25886418 |                                                                                                          | -21230   |                                                 | SEL1L3       |
| cg04366300 | 8.21E-09 | 2.89E-06 | 6.400232 | 11  | 1.25E+08 | Body                                                                                                     | 53030    | PKNX2                                           | PKNX2        |
| cg09001591 | 8.22E-09 | 2.89E-06 | 6.39996  | 2   | 29236577 | Body;Body;Body                                                                                           | 32414    | TOGARAM2                                        | TOGARAM2     |
| cg07890827 | 8.22E-09 | 2.89E-06 | 6.399862 | 10  | 1.32E+08 | Body;TSS5000                                                                                             | 5016     | EBF3;MIR4297                                    | MIR4297      |
| cg19618984 | 8.23E-09 | 2.89E-06 | 6.399733 | 18  | 77337219 | TSS5000                                                                                                  | -2062    | LOC284240                                       | LOC284240    |
| cg00449344 | 8.23E-09 | 2.89E-06 | 6.399514 | 12  | 658824   | Body                                                                                                     | 36828    | B4GALNT3                                        | LOC105369595 |
| cg13724780 | 8.24E-09 | 2.89E-06 | -6.39944 | 5   | 1.8E+08  | TSS1500;TSS1500;TSS1500;TSS1500;Body;Body;Body;Body;Body;Body;TSS1500;5'UTR;TSS1500;TSS1500;TSS1500;Body | 52       | MGAT1                                           | MGAT1        |
| cg27106356 | 8.24E-09 | 2.89E-06 | 6.399428 | 16  | 11363968 | TSS1500;TSS5000                                                                                          | -786     | TNP2;PRM3                                       | TNP2         |
| cg27395226 | 8.24E-09 | 2.89E-06 | 6.399384 | 7   | 1.05E+08 | Body;Body;Body;Body;Body;Body;Body                                                                       | 35046    | SRPK2                                           | SRPK2        |
| cg07215518 | 8.26E-09 | 2.89E-06 | 6.398755 | 13  | 22534365 |                                                                                                          | -82066   |                                                 | LINC00424    |
| cg06259339 | 8.28E-09 | 2.90E-06 | 6.398338 | 6   | 1.49E+08 | Body;TSS200                                                                                              | -143     | UST;UST-AS1                                     | UST-AS1      |
| cg06336926 | 8.28E-09 | 2.90E-06 | 6.398147 | 6   | 22571177 | 3'UTR                                                                                                    | 1383     | HDGFL1                                          | HDGFL1       |
| cg09452257 | 8.31E-09 | 2.91E-06 | 6.397304 | 16  | 2321599  | TSS5000;TSS5000;TSS5000;TSS5000;TSS5000;Body;TSS5000;TSS200;TSS5000;TSS5000                              | -148     | RNPS1;LOC106660606;MIR3677;MIR940;MIR4717;ABCA3 | MIR940       |
| cg06085038 | 8.38E-09 | 2.93E-06 | 6.395577 | 17  | 45946982 |                                                                                                          | -13919   |                                                 | SP6          |
| cg02697979 | 8.41E-09 | 2.93E-06 | 6.394738 | 11  | 34265361 | Body                                                                                                     | 114196   | ABTB2                                           | ABTB2        |
| cg24627325 | 8.41E-09 | 2.93E-06 | 6.394711 | 3   | 1.02E+08 | TSS1500                                                                                                  | -222     | LOC101929411                                    | LOC101929411 |
| cg13463109 | 8.42E-09 | 2.93E-06 | 6.394401 | 22  | 42522669 | TSS5000;Body;Body                                                                                        | 4143     | NDUFA6-DT;CYP2D6                                | CYP2D6       |
| cg18671115 | 8.44E-09 | 2.94E-06 | 6.393876 | 6   | 33154189 | Body;Body;Body;TSS5000                                                                                   | 6055     | COL11A2                                         | COL11A2      |
| cg22884541 | 8.47E-09 | 2.95E-06 | 6.39311  | 7   | 97841864 | TSS5000;1stExon;TSS5000                                                                                  | 299      | LMTK2;BHLHA15;TECPR1                            | BHLHA15      |
| cg23218877 | 8.49E-09 | 2.95E-06 | 6.392578 | 10  | 35536010 | 5'UTR                                                                                                    | 58       | CCNY                                            | CCNY         |
| cg24680570 | 8.52E-09 | 2.96E-06 | 6.391752 | 1   | 2.33E+08 |                                                                                                          | -75484   |                                                 | SIPA1L2      |
| cg14215786 | 8.53E-09 | 2.96E-06 | 6.391532 | 14  | 1.01E+08 | Body;Body;Body;Body;Body;Body                                                                            | 14808    | WDR25                                           | WDR25        |
| cg09055992 | 8.54E-09 | 2.96E-06 | 6.391366 | 8   | 1626697  | Body                                                                                                     | -56867   | DLGAP2                                          | DLGAP2-AS1   |
| cg04049637 | 8.54E-09 | 2.96E-06 | 6.391302 | 7   | 56296570 |                                                                                                          | -112460  |                                                 | NUPR2        |
| cg15744869 | 8.55E-09 | 2.96E-06 | 6.390857 | 10  | 96219442 | Body                                                                                                     | 57145    | TBC1D12                                         | TBC1D12      |
| cg15676916 | 8.59E-09 | 2.97E-06 | 6.389912 | 10  | 1.29E+08 | Body;Body                                                                                                | -156254  | DOCK1                                           | NPS          |
| cg01699581 | 8.59E-09 | 2.97E-06 | 6.389841 | 11  | 1.3E+08  |                                                                                                          | 37244    |                                                 | ADAMTS15     |
| cg08822689 | 8.59E-09 | 2.97E-06 | 6.389802 | 16  | 79021949 | Body;Body                                                                                                | 612685   | WVVOX                                           | MAF          |
| cg20603162 | 8.60E-09 | 2.97E-06 | 6.389568 | 4   | 1.23E+08 | Body;Body;Body                                                                                           | 25559    | ADAD1                                           | ADAD1        |

[illegible]



| Probe      | p_adj    | q_val    | t        | Chr | Pos.hg19  | locations                                                                         | dist2TSS | gene.Illumina              | gene.nearest |
|------------|----------|----------|----------|-----|-----------|-----------------------------------------------------------------------------------|----------|----------------------------|--------------|
| cg01389283 | 1.08E-08 | 3.41E-06 | 6.33851  | 11  | 5539372   | TSS1500;TSS5000                                                                   | -1443    | UBQLNL;OLFM5P              | UBQLNL       |
| cg16413428 | 1.08E-08 | 3.41E-06 | 6.338291 | 4   | 6114627   | 5'UTR;5'UTR;5'UTR;5'UTR                                                           | 81719    | JAKMIP1                    | JAKMIP1      |
| cg05753629 | 1.08E-08 | 3.41E-06 | 6.33823  | 1   | 43535050  |                                                                                   | -78524   | FAM183A                    | FAM183A      |
| cg02525975 | 1.09E-08 | 3.43E-06 | 6.336617 | 6   | 1.1E+08   | Body                                                                              | -14796   | AK9                        | ZBTB24       |
| cg23092788 | 1.09E-08 | 3.43E-06 | 6.336161 | 4   | 949558    | Body;Body;Body;Body;Body;Body;TES5000                                             | 17799    | TMEM175;DGKQ               | DGKQ         |
| cg25819219 | 1.09E-08 | 3.43E-06 | 6.336147 | 3   | 73112133  | Body;Body;Body;Body;3'UTR                                                         | 1324     | PPP4R2;EBLN2               | EBLN2        |
| cg18557145 | 1.09E-08 | 3.43E-06 | 6.335765 | 9   | 35618083  | Body                                                                              | 327      | CD72                       | CD72         |
| cg25143794 | 1.09E-08 | 3.44E-06 | 6.335339 | 11  | 1.23E+08  | Body;Body;Body;Body                                                               | -15803   | GRAMD1B                    | GRAMD1B      |
| cg17627813 | 1.09E-08 | 3.44E-06 | 6.335084 | 11  | 1.3E+08   | TSS1500;TSS1500;TSS1500;TSS1500;Body;Body;Body;Body;Body;Body;Body;Body           | -1039    | PRDM10                     | PRDM10       |
| cg05813544 | 1.09E-08 | 3.44E-06 | 6.334815 | 14  | 1.05E+08  | Body;Body                                                                         | 24433    | CEP170B                    | MIR12121     |
| cg21367783 | 1.10E-08 | 3.44E-06 | 6.334748 | 7   | 4775278   | Body                                                                              | -39975   | FOXK1                      | AP5Z1        |
| cg11524128 | 1.10E-08 | 3.44E-06 | 6.334722 | 2   | 1.28E+08  | Body;Body;Body                                                                    | 12618    | CYP27C1                    | CYP27C1      |
| cg20681184 | 1.10E-08 | 3.44E-06 | 6.334663 | 1   | 9750813   | Body;TSS5000;TSS5000;TSS5000;Body;TSS1500                                         | -711     | PIK3CD;PIK3CD-AS2          | PIK3CD       |
| cg02976539 | 1.10E-08 | 3.45E-06 | 6.333659 | 17  | 72757302  | Body                                                                              | 12536    | SLC9A3R1                   | SLC9A3R1     |
| cg13751265 | 1.10E-08 | 3.45E-06 | 6.333042 | 17  | 72947651  | TES5000;TES5000;3'UTR                                                             | 15659    | OTOP3;HID1                 | OTOP3        |
| cg05886789 | 1.10E-08 | 3.45E-06 | 6.332968 | 10  | 20122964  | Body;Body                                                                         | 17604    | PLXDC2                     | PLXDC2       |
| cg10507754 | 1.11E-08 | 3.47E-06 | 6.331266 | 15  | 99504358  | 3'UTR;3'UTR                                                                       | 44527    | IGF1R                      | PGPEP1L      |
| cg18278817 | 1.11E-08 | 3.47E-06 | 6.331192 | 7   | 1.59E+08  | TSS5000;Body;Body;Body                                                            | -4108    | VIPR2                      | VIPR2        |
| cg06788856 | 1.11E-08 | 3.47E-06 | 6.331117 | 17  | 1821969   |                                                                                   | 88671    | RPA1                       | RPA1         |
| cg04494844 | 1.11E-08 | 3.47E-06 | 6.331049 | 7   | 70257926  | 3'UTR;3'UTR                                                                       | -339203  | AUTS2                      | GALNT17      |
| cg15356320 | 1.11E-08 | 3.47E-06 | 6.330828 | 2   | 1.28E+08  | Body;Body;Body;Body;Body;Body;Body;Body;Body;Body;Body;Body;Body;Body             | 21641    | BIN1                       | BIN1         |
| cg04217539 | 1.11E-08 | 3.47E-06 | 6.330711 | 10  | 1.32E+08  | Body;TES5000                                                                      | 1499     | EBF3;MIR4297               | MIR4297      |
| cg07701909 | 1.12E-08 | 3.48E-06 | 6.330353 | 1   | 1.16E+08  |                                                                                   | -85381   | VANGL1                     | VANGL1       |
| cg08758352 | 1.12E-08 | 3.49E-06 | 6.32927  | 17  | 46205147  | TES5000                                                                           | 20201    | SNX11                      | SNX11        |
| cg01644385 | 1.12E-08 | 3.50E-06 | 6.328871 | 21  | 45930044  | Body;Body;Body                                                                    | 4118     | TSPEAR;TSPEAR-AS1          | TSPEAR-AS1   |
| cg26226487 | 1.13E-08 | 3.50E-06 | 6.328649 | 4   | 80329486  | TSS200                                                                            | -104     | GK2                        | GK2          |
| cg22870661 | 1.13E-08 | 3.50E-06 | 6.327963 | 3   | 57144290  | Body;5'UTR                                                                        | -30994   | IL17RD                     | ARHGEF3      |
| cg07522190 | 1.13E-08 | 3.50E-06 | 6.327776 | 16  | 28925877  | Body                                                                              | 10682    | RABEP2                     | RABEP2       |
| cg01169396 | 1.13E-08 | 3.50E-06 | 6.327715 | 5   | 1.79E+08  |                                                                                   | -38003   | TBC1D9B                    | TBC1D9B      |
| cg24285942 | 1.13E-08 | 3.51E-06 | 6.327469 | 11  | 64361020  | Body;Body;Body;Body                                                               | 2329     | SLC22A12                   | SLC22A12     |
| cg06073141 | 1.13E-08 | 3.51E-06 | 6.327124 | 3   | 1.9E+08   | 5'UTR                                                                             | 102      | CLDN16                     | CLDN16       |
| cg06883868 | 1.14E-08 | 3.51E-06 | 6.326527 | 18  | 13643516  | Body;Body;Body;Body;Body;Body                                                     | 1760     | LDLRAD4                    | LDLRAD4      |
| cg14996490 | 1.14E-08 | 3.51E-06 | 6.326439 | 6   | 32171796  | Body;Body;Body                                                                    | -8496    | NOTCH4                     | GPSM3        |
| cg02733444 | 1.14E-08 | 3.52E-06 | 6.325922 | 10  | 1.35E+08  | Body;Body                                                                         | 41360    | INPP5A                     | INPP5A       |
| cg07415530 | 1.14E-08 | 3.52E-06 | 6.325898 | 18  | 51823343  | 3'UTR;3'UTR;3'UTR;3'UTR;Body;Body;3'UTR;3'UTR;3'UTR;3'UTR;3'UTR;3'UTR;3'UTR;3'UTR | 27400    | POLI                       | POLI         |
| cg10357368 | 1.14E-08 | 3.53E-06 | 6.325181 | 13  | 1.09E+08  |                                                                                   | 133073   | TNFSF13B                   | TNFSF13B     |
| cg20258934 | 1.15E-08 | 3.54E-06 | 6.323985 | 7   | 4119142   | Body                                                                              | -50174   | SDK1                       | SDK1         |
| cg07798386 | 1.15E-08 | 3.55E-06 | 6.323623 | 19  | 12874033  | TES5000;3'UTR;3'UTR                                                               | 11429    | BEST2;HOOK2                | BEST2        |
| cg06942124 | 1.16E-08 | 3.56E-06 | 6.322566 | 1   | 166899771 |                                                                                   | 79554    | PDE4B                      | PDE4B        |
| cg23209962 | 1.16E-08 | 3.58E-06 | 6.321184 | 5   | 73163484  | Body;Body;Body                                                                    | 54114    | ARHGEF28                   | ARHGEF28     |
| cg03263716 | 1.16E-08 | 3.58E-06 | 6.320826 | 11  | 64435066  | Body;Body                                                                         | -24049   | NRXN2                      | NRXN2        |
| cg24354958 | 1.17E-08 | 3.58E-06 | 6.32056  | 8   | 49954840  |                                                                                   | -12054   | PPDPFL                     | PPDPFL       |
| cg03404726 | 1.17E-08 | 3.58E-06 | 6.320416 | 10  | 76818754  | TSS1500                                                                           | -413     | DUPD1                      | DUPD1        |
| cg12342451 | 1.17E-08 | 3.59E-06 | 6.319885 | 10  | 86001509  | TSS1500;TSS5000;TSS5000;TSS5000                                                   | -207     | LRIT1;RGR                  | LRIT1        |
| cg19140548 | 1.17E-08 | 3.59E-06 | 6.319857 | 10  | 1.06E+08  | Body                                                                              | 45870    | SH3PXD2A                   | SH3PXD2A-AS1 |
| cg01130922 | 1.17E-08 | 3.59E-06 | 6.319692 | 7   | 552776    | Body;Body                                                                         | 6705     | PDGFA                      | PDGFA        |
| cg12614113 | 1.17E-08 | 3.59E-06 | 6.319408 | 10  | 79133935  | Body;Body;Body;Body;Body;Body;Body;Body;Body;Body;Body                            | 23306    | KCNMA1;KCNMA1-AS3          | KCNMA1-AS3   |
| cg05719052 | 1.17E-08 | 3.59E-06 | 6.31899  | 17  | 3561497   | Body;Body;TES5000;TES5000;TES5000                                                 | 10375    | CTNS;TAX1BP3;P2RX5-TAX1BP3 | TAX1BP3      |
| cg06371044 | 1.17E-08 | 3.59E-06 | 6.318939 | 8   | 1.45E+08  | TSS5000;TSS5000                                                                   | -1748    | NRBP2;MIR6845              | NRBP2        |
| cg02485236 | 1.17E-08 | 3.59E-06 | 6.31881  | 16  | 67067224  | Body;Body;Body;Body;Body;Body                                                     | 4173     | CBFB                       | CBFB         |
| cg08205236 | 1.18E-08 | 3.59E-06 | 6.318621 | 11  | 68776740  | Body;Body;TSS5000                                                                 | -3081    | MRGPRF;MRGPRF-AS1          | MRGPRF-AS1   |
| cg26091981 | 1.18E-08 | 3.60E-06 | 6.318217 | 2   | 1.37E+08  | TSS200;TES5000                                                                    | -112     | LCT;MCM6                   | LCT          |
| cg08033838 | 1.18E-08 | 3.60E-06 | 6.317959 | 14  | 78378994  | Body;Body;Body;Body;Body;Body;Body;Body;Body                                      | 112543   | ADCK1                      | ADCK1        |
| cg07170302 | 1.18E-08 | 3.60E-06 | 6.317574 | 11  | 1.18E+08  | TSS200;Body;Body;Body                                                             | -34      | FXYD2;FXYD6-FXYD2          | FXYD2        |
| cg21079719 | 1.18E-08 | 3.60E-06 | 6.31719  | 15  | 98568785  | TES5000;TES5000;TES5000                                                           | 22518    | LINC02251                  | LINC02251    |
| cg04768315 | 1.18E-08 | 3.61E-06 | 6.316947 | 2   | 1898518   | Body;Body;Body;Body;Body;Body;Body;Body;Body                                      | -150231  | MYT1L                      | PXDN         |
| cg17151621 | 1.19E-08 | 3.61E-06 | 6.316461 | 3   | 1.86E+08  | TSS1500;TSS1500;TSS1500;TSS1500                                                   | -781     | AHSG                       | AHSG         |
| cg19911494 | 1.19E-08 | 3.61E-06 | 6.316252 | 5   | 9169758   | Body                                                                              | -115751  | SEMA5A                     | MIR4636      |
| cg14455403 | 1.19E-08 | 3.62E-06 | 6.31519  | 3   | 8596772   | Body;TES5000;Body;Body                                                            | -16695   | LMCD1                      | LINC00312    |
| cg09130091 | 1.19E-08 | 3.62E-06 | 6.315158 | 6   | 31838613  | Body;Body;Body                                                                    | 6835     | SLC44A4                    | SLC44A4      |

[illegible]



| Probe      | p_adj    | q_val    | t        | Chr | Pos.hg19 | locations                                                                  | dist2TSS | gene.Illumina         | gene.nearest |
|------------|----------|----------|----------|-----|----------|----------------------------------------------------------------------------|----------|-----------------------|--------------|
| cg00689330 | 1.44E-08 | 4.04E-06 | 6.272841 | 13  | 50024281 | Body;Body;Body;Body;Body                                                   | 5872     | SETDB2;SETDB2-PHF11   | SETDB2-PHF11 |
| cg27394794 | 1.44E-08 | 4.05E-06 | 6.272168 | 10  | 52600370 | Body;Body;Body;Body;Body;Body;Body                                         | 45017    | A1CF                  | A1CF         |
| cg17826530 | 1.44E-08 | 4.05E-06 | 6.271788 | 1   | 59280290 | Body;Body;Body                                                             | 29468    | LINC01135             | LINC01135    |
| cg04147929 | 1.44E-08 | 4.05E-06 | 6.271664 | 1   | 2.24E+08 | TSS1500                                                                    | -1301    | CAPN8                 | CAPN8        |
| cg27361520 | 1.45E-08 | 4.07E-06 | 6.270902 | 2   | 1.03E+08 | Body                                                                       | 2922     | IL18RAP               | IL18RAP      |
| cg23419907 | 1.46E-08 | 4.08E-06 | 6.26992  | 2   | 2.2E+08  | TESS000;TESS000;TESS000;TESS000;TESS000                                    | 4603     | DNAJB2;PTPRN;MIR153-1 | MIR153-1     |
| cg09400152 | 1.46E-08 | 4.09E-06 | 6.269205 | 15  | 83226580 | Body;Body;Body;Body;Body;Body;Body;Body;Body;Body;Body;Body;Body;Body;Body | 13936    | CPEB1                 | CPEB1        |
| cg14118523 | 1.46E-08 | 4.09E-06 | 6.269037 | 2   | 30629374 |                                                                            | -40737   |                       | LCLAT1       |
| cg23982568 | 1.47E-08 | 4.10E-06 | 6.268419 | 8   | 6118526  |                                                                            | 145543   |                       | LOC100287015 |
| cg06034255 | 1.47E-08 | 4.10E-06 | 6.268319 | 10  | 1.26E+08 | Body;Body;Body;Body                                                        | 44964    | CHST15                | CHST15       |
| cg22529396 | 1.47E-08 | 4.11E-06 | 6.267745 | 2   | 1.28E+08 | TSS200                                                                     | -191     | MYO7B                 | MYO7B        |
| cg06643056 | 1.48E-08 | 4.12E-06 | 6.26676  | 5   | 1.71E+08 | Body                                                                       | 29033    | FGF18                 | FGF18        |
| cg12430457 | 1.48E-08 | 4.12E-06 | 6.266585 | 12  | 79439547 | Body;Body;Body;5'UTR                                                       | 76       | SYT1                  | SYT1         |
| cg15262728 | 1.48E-08 | 4.13E-06 | 6.266057 | 2   | 2.32E+08 | Body;Body;Body;Body;Body                                                   | 4284     | ITM2C                 | ITM2C        |
| cg13407062 | 1.49E-08 | 4.14E-06 | 6.265406 | 8   | 1.44E+08 | Body;Body;Body                                                             | 5619     | TOP1MT                | TOP1MT       |
| cg15466222 | 1.49E-08 | 4.14E-06 | 6.264936 | 6   | 1.39E+08 | TSS1500;TSS5000;TSS5000                                                    | -1492    | HEBP2                 | HEBP2        |
| cg18538751 | 1.49E-08 | 4.15E-06 | 6.264746 | 2   | 2.34E+08 | TSS1500;Body                                                               | -1183    | NGEF;LOC101928881     | NGEF         |
| cg00490431 | 1.49E-08 | 4.15E-06 | 6.264375 | 17  | 48201664 | Body;Body                                                                  | 5860     | SAMD14                | SAMD14       |
| cg07297777 | 1.49E-08 | 4.15E-06 | 6.264319 | 12  | 56097482 | Body;Body;Body;Body;Body                                                   | 4206     | ITGA7                 | ITGA7        |
| cg26116525 | 1.50E-08 | 4.16E-06 | 6.26365  | 11  | 62371596 | TSS5000;TSS5000;Body;Body;Body                                             | -2259    | MTA2;EML3             | MTA2         |
| cg19473392 | 1.50E-08 | 4.16E-06 | 6.263207 | 6   | 35170850 |                                                                            | -10882   |                       | SCUBE3       |
| cg06014083 | 1.51E-08 | 4.19E-06 | 6.261572 | 17  | 81052928 | TESS000;TESS000                                                            | 13907    | METRNL                | METRNL       |
| cg18191138 | 1.52E-08 | 4.20E-06 | 6.26067  | 5   | 1487638  | Body                                                                       | 23333    | LPCAT1                | MIR6075      |
| cg18648055 | 1.52E-08 | 4.21E-06 | 6.260287 | 12  | 32403282 | Body;Body;Body;Body;Body;Body;Body                                         | 143502   | BICD1                 | BICD1        |
| cg09998078 | 1.52E-08 | 4.21E-06 | 6.260217 | 14  | 94448493 |                                                                            | -5577    |                       | ASB2         |
| cg06884875 | 1.52E-08 | 4.22E-06 | 6.259516 | 11  | 46313051 | Body                                                                       | 13839    | CREB3L1               | CREB3L1      |
| cg00664454 | 1.53E-08 | 4.22E-06 | 6.259159 | 16  | 57149847 | Body                                                                       | 23353    | CPNE2                 | CPNE2        |
| cg01875118 | 1.54E-08 | 4.26E-06 | 6.257064 | 14  | 1.05E+08 | Body                                                                       | 1341     | LINC00638             | LINC00638    |
| cg02914790 | 1.54E-08 | 4.26E-06 | 6.257016 | 3   | 1.23E+08 | TSS200                                                                     | -4       | LINC02035             | LINC02035    |
| cg08440945 | 1.54E-08 | 4.26E-06 | 6.256615 | 11  | 65983863 | Body                                                                       | -40901   | PACS1                 | KLC2         |
| cg00161450 | 1.55E-08 | 4.27E-06 | 6.255921 | 2   | 63849938 |                                                                            | 33654    |                       | MDH1         |
| cg26017506 | 1.55E-08 | 4.27E-06 | 6.255708 | 3   | 57312779 | Body;1stExon;TESS000                                                       | 201      | ASB14;LOC105377102    | ASB14        |
| cg20147164 | 1.55E-08 | 4.27E-06 | 6.255467 | 2   | 1879019  | Body;Body;Body;Body;Body;Body;Body;Body;Body                               | -130732  | MYT1L                 | PXDN         |
| cg20491573 | 1.55E-08 | 4.28E-06 | 6.255291 | 12  | 1.31E+08 | Body;Body;Body;Body;Body                                                   | 6785     | RIMBP2                | RIMBP2       |
| cg06839777 | 1.56E-08 | 4.28E-06 | -6.2549  | 6   | 1.23E+08 | TSS                                                                        |          |                       |              |

[illegible]

| Probe      | p_adj    | q_val    | t        | Chr | Pos.hg19 | locations                                                                            | dist2TSS | gene.Illumina               | gene.nearest |
|------------|----------|----------|----------|-----|----------|--------------------------------------------------------------------------------------|----------|-----------------------------|--------------|
| cg14454015 | 1.75E-08 | 4.58E-06 | 6.22819  | 9   | 88971417 | TSS5000;TSS5000;TSS5000;TSS5000                                                      | -2092    | TUT7                        | TUT7         |
| cg14020278 | 1.76E-08 | 4.59E-06 | 6.22726  | 9   | 1.4E+08  | Body;Body;Body;TSS5000                                                               | 1990     | RABL6;MIR4292               | MIR4292      |
| cg04975966 | 1.76E-08 | 4.59E-06 | 6.22717  | 1   | 1.11E+08 | Body                                                                                 | 3321     | ALX3                        | ALX3         |
| cg10355623 | 1.76E-08 | 4.59E-06 | 6.22699  | 2   | 2.33E+08 | TSS5000                                                                              | 8814     | ALPG                        | ALPG         |
| cg00566187 | 1.76E-08 | 4.61E-06 | 6.22626  | 1   | 2.3E+08  | Body;Body                                                                            | 47372    | GALNT2                      | GALNT2       |
| cg24331786 | 1.76E-08 | 4.61E-06 | 6.226133 | 17  | 76895244 | Body;Body;Body                                                                       | 4039     | TIMP2;CEP295NL              | CEP295NL     |
| cg14558431 | 1.76E-08 | 4.61E-06 | 6.22599  | 9   | 89763370 | TSS200                                                                               | -188     | LINC02872                   | LINC02872    |
| cg08651894 | 1.77E-08 | 4.61E-06 | 6.225807 | 1   | 1.55E+08 | 5'UTR;Body;Body;Body;Body                                                            | 117      | KCNN3                       | KCNN3        |
| cg12354318 | 1.77E-08 | 4.61E-06 | 6.225686 | 10  | 14582415 | TSS5000;Body;Body;Body;Body;Body;Body;Body;Body;Body;Body;Body                       | -1874    | FAM107B                     | FAM107B      |
| cg03731898 | 1.77E-08 | 4.61E-06 | 6.225541 | 2   | 2.08E+08 | TSS200                                                                               | -160     | CPO                         | CPO          |
| cg09997638 | 1.77E-08 | 4.61E-06 | 6.22538  | 19  | 17530742 | TSS5000;TSS5000;Body;TSS200                                                          | -113     | BISPR;MVB12A                | MVB12A       |
| cg05218346 | 1.77E-08 | 4.61E-06 | 6.22516  | 14  | 70041283 | 5'UTR                                                                                | 305      | CCDC177                     | CCDC177      |
| cg11867016 | 1.77E-08 | 4.61E-06 | 6.224912 | 4   | 1.3E+08  |                                                                                      | 173563   | LINC02615                   | LINC02615    |
| cg02833614 | 1.78E-08 | 4.61E-06 | 6.224606 | 10  | 1.35E+08 | Body;Body                                                                            | 41379    | INPP5A                      | INPP5A       |
| cg06594578 | 1.78E-08 | 4.61E-06 | 6.224557 | 12  | 49719373 | TSS1500;TSS5000;TSS5000;Body                                                         | -1014    | LOC101927267;TROAP          | LOC101927267 |
| cg13800802 | 1.78E-08 | 4.61E-06 | 6.2245   | 9   | 98619666 | Body                                                                                 | -18306   | LINC00476                   | ERCC6L2      |
| cg04121415 | 1.78E-08 | 4.62E-06 | 6.223984 | 3   | 38325566 | Body                                                                                 | 1782     | SLC22A14                    | SLC22A14     |
| cg04573653 | 1.79E-08 | 4.64E-06 | 6.222641 | 7   | 28072450 | Body                                                                                 | -147625  | JAZF1                       | JAZF1-AS1    |
| cg05536132 | 1.80E-08 | 4.66E-06 | 6.221742 | 10  | 76335449 | Body;Body;Body;Body;Body;Body                                                        | -46367   | ADK                         | LOC102723439 |
| cg19246549 | 1.80E-08 | 4.67E-06 | 6.221055 | 1   | 1.55E+08 | Body;Body;Body;Body;Body                                                             | 89827    | KCNN3                       | KCNN3        |
| cg21046119 | 1.81E-08 | 4.67E-06 | 6.220798 | 2   | 1.34E+08 | Body;Body                                                                            | 51359    | NCKAP5                      | NCKAP5-AS2   |
| cg03343942 | 1.81E-08 | 4.68E-06 | 6.220179 | 12  | 56625109 | TSS5000;1stExon;1stExon                                                              | 609      | NABP2;SLC39A5               | SLC39A5      |
| cg18404706 | 1.82E-08 | 4.69E-06 | 6.219546 | 19  | 18761564 | Body;Body;Body;Body;Body;Body                                                        | 6117     | KLHL26                      | KLHL26       |
| cg07167632 | 1.82E-08 | 4.69E-06 | 6.219335 | 11  | 67269440 | Body;Body;TSS5000;TSS5000;TSS5000                                                    | 3394     | PITPNM1;CDK2AP2             | PITPNM1      |
| cg07974025 | 1.82E-08 | 4.69E-06 | 6.219258 | 1   | 3150935  | Body;Body                                                                            | 106397   | PRDM16                      | MIR4251      |
| cg08472341 | 1.82E-08 | 4.69E-06 | 6.219251 | 5   | 17670475 |                                                                                      | -14517   |                             | H3Y1         |
| cg09029959 | 1.82E-08 | 4.69E-06 | 6.219226 | 4   | 1.64E+08 |                                                                                      | 108856   |                             | MIR4454      |
| cg02603003 | 1.82E-08 | 4.69E-06 | 6.218912 | 17  | 10535221 | Body                                                                                 | 25405    | MYH3                        | MYH3         |
| cg04844423 | 1.82E-08 | 4.69E-06 | 6.2189   | 1   | 48188069 |                                                                                      | 274988   |                             | TRABD2B      |
| cg19026547 | 1.82E-08 | 4.69E-06 | 6.218736 | 22  | 42688838 |                                                                                      | -8905    |                             | TCF20        |
| cg04276316 | 1.82E-08 | 4.69E-06 | 6.218723 | 1   | 2572242  | TSS5000                                                                              | -7787    | TTC34                       | MMEL1        |
| cg15477209 | 1.82E-08 | 4.69E-06 | 6.218684 | 6   | 1408659  |                                                                                      | -18013   |                             | MIR6720      |
| cg05035024 | 1.82E-08 | 4.69E-06 | 6.218408 | 17  | 7912378  | Body                                                                                 | 6446     | GUCY2D                      | GUCY2D       |
| cg15998505 | 1.83E-08 | 4.69E-06 | 6.218241 | 1   | 1.53E+08 |                                                                                      | 28766    |                             | S100A6       |
| cg24582338 | 1.83E-08 | 4.69E-06 | 6.218061 | 6   | 1.07E+08 |                                                                                      | 47616    |                             | PRDM1        |
| cg02250028 | 1.83E-08 | 4.70E-06 | 6.21763  | 15  | 75775352 | Body                                                                                 | -27196   | PTPN9                       | SIN3A        |
| cg23733608 | 1.83E-08 | 4.70E-06 | 6.217428 | 21  | 35261572 | 3'UTR;3'UTR                                                                          | 26536    | ITSN1                       | ATP5PO       |
| cg27265778 | 1.83E-08 | 4.70E-06 | 6.217335 | 1   | 1.58E+08 |                                                                                      | -6220    |                             | LINC01704    |
| cg05358575 | 1.84E-08 | 4.71E-06 | 6.216803 | 2   | 26764961 | Body;Body                                                                            | 16663    | OTOF                        | OTOF         |
| cg02296890 | 1.84E-08 | 4.71E-06 | 6.216474 | 5   | 73495785 |                                                                                      | 108365   |                             | LINC01335    |
| cg15007123 | 1.84E-08 | 4.71E-06 | 6.216167 | 12  | 1.12E+08 | 3'UTR;3'UTR;3'UTR                                                                    | 8265     | PHETA1                      | PHETA1       |
| cg26035615 | 1.84E-08 | 4.72E-06 | 6.215914 | 6   | 30038254 | TSS5000;3'UTR;3'UTR                                                                  | 3280     | PPP1R11;RNF39               | PPP1R11      |
| cg22367466 | 1.85E-08 | 4.72E-06 | 6.215671 | 12  | 6840532  | 3'UTR;3'UTR;3'UTR;3'UTR                                                              | 7080     | COP57A                      | COP57A       |
| cg25486749 | 1.85E-08 | 4.72E-06 | 6.215659 | 10  | 1.33E+08 | Body                                                                                 | 49251    | TCERG1L                     | TCERG1L-AS1  |
| cg14811011 | 1.85E-08 | 4.72E-06 | 6.215357 | 17  | 73055792 | Body;Body;Body                                                                       | 12473    | KCTD2                       | KCTD2        |
| cg18394881 | 1.85E-08 | 4.73E-06 | 6.21496  | 1   | 3512777  | Body                                                                                 | 15295    | MEGF6                       | MEGF6        |
| cg13496041 | 1.85E-08 | 4.73E-06 | 6.21463  | 3   | 14494726 | Body;Body;Body                                                                       | 50621    | SLC6A6                      | SLC6A6       |
| cg13782388 | 1.86E-08 | 4.74E-06 | 6.213868 | 3   | 1.27E+08 | Body;Body                                                                            | -92686   | CHCHD6                      | PLXNA1       |
| cg13043400 | 1.86E-08 | 4.74E-06 | 6.213863 | 7   | 1530760  | Body                                                                                 | 13265    | INTS1                       | INTS1        |
| cg05335473 | 1.87E-08 | 4.75E-06 | 6.213152 | 1   | 84040080 | TSS5000                                                                              | 128344   | LINC01725                   | LINC01712    |
| cg05318454 | 1.87E-08 | 4.75E-06 | 6.21303  | 19  | 46117805 | Body;Body;Body;Body;Body;Body;Body;Body;Body;Body;Body                               | -12335   | EML2                        | GPR4         |
| cg18593210 | 1.87E-08 | 4.75E-06 | 6.212994 | 17  | 81021770 |                                                                                      | -12084   |                             | B3GNTL1      |
| cg21222007 | 1.87E-08 | 4.75E-06 | 6.212748 | 9   | 38055200 | Body                                                                                 | 14024    | SHB                         | SHB          |
| cg07973479 | 1.87E-08 | 4.76E-06 | 6.212425 | 13  | 25945255 | TSS1500                                                                              | -856     | ATP8A2                      | ATP8A2       |
| cg15616998 | 1.87E-08 | 4.76E-06 | 6.212277 | 1   | 40435396 | 3'UTR;3'UTR;3'UTR;3'UTR;3'UTR;3'UTR;Body                                             | 14580    | MFS2D2A                     | MFS2D2A      |
| cg04479041 | 1.88E-08 | 4.77E-06 | 6.211513 | 5   | 10838874 |                                                                                      | -77528   |                             | DAP          |
| cg08043210 | 1.88E-08 | 4.77E-06 | 6.211257 | 12  | 1.04E+08 | Body;Body;TSS5000                                                                    | 3661     | GLT8D2;HCFC2                | GLT8D2       |
| cg25365006 | 1.89E-08 | 4.78E-06 | 6.210813 | 3   | 1.26E+08 | TSS1500;TSS5000;TSS5000;TSS5000;TSS5000;TSS5000                                      | -361     | SLC41A3;ALDH1L1;ALDH1L1-AS1 | SLC41A3      |
| cg23286295 | 1.89E-08 | 4.78E-06 | 6.210794 | 19  | 48674931 | TSS1500;TSS1500;TSS1500;TSS1500;TSS1500;TSS1500;TSS1500;TSS1500;TSS1500;TSS1500;Body | 995      | LIG1;ZSWIM9                 | ZSWIM9       |
| cg11843948 | 1.89E-08 | 4.78E-06 | 6.210296 | 7   | 5410861  | Body                                                                                 | 52316    | TNRC18                      | TNRC18       |

| Probe      | p_adj    | q_val    | t        | Chr | Pos.hg19 | locations                                                               | dist2TSS | gene.Illumina                      | gene.nearest |
|------------|----------|----------|----------|-----|----------|-------------------------------------------------------------------------|----------|------------------------------------|--------------|
| cg01446100 | 1.89E-08 | 4.78E-06 | 6.21029  | 2   | 2.4E+08  | Body                                                                    | -14113   | HDAC4                              | MIR2467      |
| cg13666659 | 1.90E-08 | 4.79E-06 | 6.209688 | 17  | 26487538 | Body                                                                    | -66050   | NLK                                | PYY2         |
| cg26151839 | 1.90E-08 | 4.80E-06 | 6.209116 | 6   | 1.3E+08  |                                                                         | -17371   |                                    | L3MBTL3      |
| cg12193249 | 1.90E-08 | 4.80E-06 | 6.209057 | 19  | 440701   | Body                                                                    | 20295    | SHC2                               | SHC2         |
| cg18180846 | 1.90E-08 | 4.80E-06 | 6.208792 | 10  | 1.03E+08 | TSS5000;Body                                                            | 1505     | LBX1;LBX1-AS1                      | LBX1-AS1     |
| cg25604819 | 1.90E-08 | 4.80E-06 | 6.208749 | 3   | 82857026 |                                                                         | 821734   |                                    | LINC02008    |
| cg21248405 | 1.90E-08 | 4.80E-06 | 6.20873  | 6   | 30156394 | Body;Body                                                               | 24789    | TRIM26                             | TRIM26       |
| cg13844287 | 1.91E-08 | 4.80E-06 | 6.208341 | 1   | 28476989 | Body;Body;Body;Body                                                     | 26212    | PTAFR                              | PTAFR        |
| cg18760317 | 1.91E-08 | 4.80E-06 | 6.208338 | 7   | 1.18E+08 | 1stExon                                                                 | 170      | ANKRD7                             | ANKRD7       |
| cg00033371 | 1.91E-08 | 4.80E-06 | 6.208328 | 19  | 4956786  | Body;Body;Body;Body                                                     | -12337   | UHRF1                              | KDM4B        |
| cg23746148 | 1.91E-08 | 4.80E-06 | 6.208297 | 6   | 1.35E+08 | TSS1500;TSS1500;TSS1500                                                 | -562     | ALDH8A1                            | ALDH8A1      |
| cg15405429 | 1.91E-08 | 4.81E-06 | 6.207737 | 17  | 76556857 | Body                                                                    | 16621    | DNAH17                             | DNAH17       |
| cg05482119 | 1.91E-08 | 4.81E-06 | 6.207413 | 3   | 49191777 | Body                                                                    | 57       | LAMB2P1                            | LAMB2P1      |
| cg26558992 | 1.92E-08 | 4.82E-06 | 6.206883 | 1   | 1.47E+08 | Body;Body                                                               | 848      | GJA5                               | GJA5         |
| cg02308712 | 1.92E-08 | 4.82E-06 | 6.206801 | 12  | 52598204 | TSS5000;TSS5000;TSS5000;TSS5000;TSS5000;TSS5000                         | 6410     | LINC02874                          | LINC02874    |
| cg01350169 | 1.92E-08 | 4.82E-06 | 6.206529 | 10  | 98862384 | Body;TSS200                                                             | -128     | SLIT1;SLIT1-AS1                    | SLIT1-AS1    |
| cg20530613 | 1.93E-08 | 4.84E-06 | 6.205549 | 3   | 99440673 | Body;Body                                                               | 83236    | COL8A1                             | COL8A1       |
| cg11630148 | 1.93E-08 | 4.84E-06 | 6.205405 | 10  | 1.34E+08 | Body                                                                    | 54090    | INPP5A                             | INPP5A       |
| cg06438114 | 1.94E-08 | 4.86E-06 | 6.20449  | 1   | 27954305 | TSS1500;Body;TSS5000                                                    | -1197    | FGR                                | FGR          |
| cg13728308 | 1.95E-08 | 4.87E-06 | 6.203623 | 14  | 34532891 |                                                                         | -112611  |                                    | EGLN3        |
| cg06888836 | 1.95E-08 | 4.87E-06 | 6.203534 | 1   | 2074268  | Body;Body;Body;Body;Body;Body;Body;Body                                 | 38114    | PRKCZ                              | PRKCZ        |
| cg03656688 | 1.95E-08 | 4.87E-06 | 6.203505 | 7   | 1.34E+08 | Body;Body;Body                                                          | 4040     | LRGUK                              | LRGUK        |
| cg13392848 | 1.95E-08 | 4.87E-06 | 6.203297 | 6   | 1.7E+08  |                                                                         | 17338    |                                    | LINC01615    |
| cg06678137 | 1.95E-08 | 4.87E-06 | 6.203019 | 11  | 495007   | TSS5000;TSS5000;TSS5000;TSS5000;Body;Body;Body;Body;Body;Body;Body      | 11761    | PTDSS2;RNH1                        | RNH1         |
| cg05308819 | 1.96E-08 | 4.88E-06 | 6.202425 | 1   | 1.56E+08 |                                                                         | -9805    |                                    | ARHGEF2      |
| cg00958815 | 1.96E-08 | 4.88E-06 | 6.202288 | 6   | 31736112 | TSS5000;TSS5000;TSS5000;Body                                            | -2747    | MSH5-SAPCD1;SAPCD1;SAPCD1-AS1;VWA7 | SAPCD1-AS1   |
| cg07444554 | 1.97E-08 | 4.90E-06 | 6.201215 | 5   | 1.39E+08 | Body;Body;Body;Body;Body                                                | 77379    | NRG2                               | PSD2         |
| cg11185950 | 1.97E-08 | 4.91E-06 | 6.200981 | 5   | 73482658 |                                                                         | 121492   |                                    | LINC01335    |
| cg07364781 | 1.97E-08 | 4.91E-06 | 6.200427 | 12  | 26221695 | Body;Body;Body;Body                                                     | 16199    | RASSF8                             | RASSF8       |
| cg00095396 | 1.98E-08 | 4.92E-06 | 6.200267 | 16  | 87722219 | Body;Body                                                               | 77373    | JPH3                               | KLHDC4       |
| cg11411127 | 1.98E-08 | 4.92E-06 | 6.19985  | 21  | 35821909 | Body;Body;Body;Body;Body;Body;Body;Body                                 | 6198     | KCNE1                              | KCNE1        |
| cg09527561 | 1.98E-08 | 4.93E-06 | 6.199552 | 2   | 1.75E+08 | Body;Body                                                               | 48826    | WIPF1                              | WIPF1        |
| cg27605104 | 1.98E-08 | 4.93E-06 | 6.199283 | 16  | 85349644 |                                                                         | -9713    |                                    | MIR5093      |
| cg13686648 | 1.99E-08 | 4.93E-06 | 6.198969 | 13  | 34256302 |                                                                         | -5371    |                                    | STARD13      |
| cg11403706 | 1.99E-08 | 4.93E-06 | 6.198775 | 22  | 49042600 | Body;Body                                                               | 70449    | TAF45                              | TAF45        |
| cg02478172 | 1.99E-08 | 4.94E-06 | 6.198165 | 7   | 1.57E+08 | Body;Body;Body;Body;Body                                                | -100968  | PTPRN2                             | MIR153-2     |
| cg09325506 | 1.99E-08 | 4.94E-06 | -6.19811 | 2   | 2.43E+08 | TSS5000                                                                 | -4446    | LINC01880                          | LINC01880    |
| cg23705113 | 2.00E-08 | 4.94E-06 | 6.197915 | 11  | 77774867 | Body;Body;Body;TSS200;TSS5000;TSS5000;TSS5000                           | -39      | NDUFC2-KCTD14;THRSP;NDUFC2         | THRSP        |
| cg07348300 | 2.00E-08 | 4.95E-06 | 6.197326 | 1   | 37949342 | 3'UTR;3'UTR;3'UTR;TSS5000                                               | 3512     | ZC3H12A;MIR6732                    | MIR6732      |
| cg14330206 | 2.01E-08 | 4.97E-06 | 6.196324 | 17  | 76490717 | Body;Body                                                               | 9726     | DNAH17;DNAH17-AS1                  | DNAH17-AS1   |
| cg08041140 | 2.01E-08 | 4.98E-06 | 6.195789 | 15  | 69383275 | Body                                                                    | 10086    | EWSAT1                             | EWSAT1       |
| cg11958675 | 2.02E-08 | 5.00E-06 | 6.194933 | 10  | 35618813 | Body                                                                    | -6623    | CCNY                               | CCNY         |
| cg09240001 | 2.02E-08 | 5.00E-06 | 6.194717 | 6   | 27292364 | TSS200                                                                  | -175     | VNIR10P                            | VNIR10P      |
| cg02423030 | 2.02E-08 | 5.00E-06 | 6.194709 | 19  | 12968505 | Body                                                                    | 5432     | MAST1                              | MIR6794      |
| cg24395504 | 2.02E-08 | 5.00E-06 | 6.19461  | 6   | 1.55E+08 |                                                                         | -38090   |                                    | CNKSR3       |
| cg06790053 | 2.03E-08 | 5.00E-06 | 6.194329 | 1   | 2.47E+08 |                                                                         | -13465   |                                    | LINC01341    |
| cg25350703 | 2.03E-08 | 5.01E-06 | 6.193745 | 10  | 88329610 |                                                                         | -48061   |                                    | WAPL         |
| cg07888300 | 2.03E-08 | 5.01E-06 | 6.193586 | 16  | 57879672 |                                                                         | 35124    |                                    | LOC388282    |
| cg11758345 | 2.04E-08 | 5.02E-06 | 6.193238 | 17  | 79304498 |                                                                         | -21450   |                                    | LINC00482    |
| cg00232903 | 2.04E-08 | 5.02E-06 | 6.193129 | 15  | 49779212 | Body;Body;3'UTR                                                         | 63774    | FAM227B;FGF7                       | FGF7         |
| cg05216221 | 2.04E-08 | 5.02E-06 | 6.192827 | 11  | 1.11E+08 | TSS1500;TSS1500;TSS200;5'UTR;Body;Body;Body;Body;Body                   | 22       | COLCA1;COLCA2                      | COLCA1       |
| cg10736955 | 2.04E-08 | 5.02E-06 | 6.192652 | 6   | 33150216 | Body;Body;Body;TSS5000                                                  | 10028    | COL11A2                            | COL11A2      |
| cg16711450 | 2.04E-08 | 5.02E-06 | 6.192567 | 11  | 2183505  | TSS1500;TSS1500;TSS1500;TSS1500;TSS1500;TSS1500;TSS5000;TSS5000;TSS5000 | -1066    | INS-IGF2;INS;TH                    | INS          |
| cg13348519 | 2.04E-08 | 5.02E-06 | 6.192515 | 6   | 42691466 | TSS1500;TSS5000                                                         | -1131    | PRPH2;ATP6V0CP3                    | PRPH2        |
| cg24545495 | 2.04E-08 | 5.02E-06 | 6.192376 | 1   | 6149049  | Body;Body;Body;Body;Body                                                | 43102    | KCNAB2                             | KCNAB2       |
| cg09516509 | 2.04E-08 | 5.02E-06 | 6.192335 | 20  | 43849998 | TSS200                                                                  | -15      | SEMG2                              | SEMG2        |
| cg00540593 | 2.05E-08 | 5.03E-06 | 6.191459 | 20  | 61977814 | 3'UTR;Body;3'UTR                                                        | -13525   | CHRNA4                             | LOC100130587 |
| cg17818873 | 2.06E-08 | 5.04E-06 | 6.190755 | 1   | 1.54E+08 | TSS5000;TSS5000;Body;Body;Body;Body;Body;Body;TSS5000                   | 2839     | SLC39A1;CREB3L4;JTB                | CREB3L4      |
| cg12008118 | 2.06E-08 | 5.04E-06 | 6.190742 | 10  | 88428429 | TSS5000;TSS5000;5'UTR;5'UTR;5'UTR;5'UTR;5'UTR;5'UTR;5'UTR;5'UTR;5'UTR   | 109      | OPN4;LDB3                          | LDB3         |

| Probe      | p_adj    | q_val    | t        | Chr | Pos.hg19 | locations                                                                                                 | dist2TSS | gene.Illumina                       | gene.nearest |
|------------|----------|----------|----------|-----|----------|-----------------------------------------------------------------------------------------------------------|----------|-------------------------------------|--------------|
| cg23202058 | 2.06E-08 | 5.04E-06 | 6.190552 | 4   | 1.85E+08 | TSS1500                                                                                                   | -622     | ENPP6                               | ENPP6        |
| cg13508741 | 2.06E-08 | 5.05E-06 | 6.190147 | 11  | 32012497 |                                                                                                           | 50367    |                                     | LOC100506675 |
| cg16569813 | 2.07E-08 | 5.05E-06 | 6.18992  | 3   | 58235849 | Body;Body                                                                                                 | 12331    | ABHD6                               | ABHD6        |
| cg20944177 | 2.07E-08 | 5.05E-06 | 6.189821 | 13  | 30062797 | Body;Body;Body;Body;TSS1500                                                                               | -910     | MTUS2;MTUS2-AS1                     | MTUS2-AS1    |
| cg19764295 | 2.07E-08 | 5.05E-06 | 6.189719 | 7   | 1.35E+08 | Body;Body;Body;Body;Body                                                                                  | 19193    | CALD1                               | CALD1        |
| cg04581073 | 2.07E-08 | 5.05E-06 | 6.189645 | 6   | 37776593 |                                                                                                           | -10909   |                                     | ZFAND3       |
| cg07087779 | 2.07E-08 | 5.05E-06 | 6.18955  | 16  | 2194837  | TSS5000;TSS5000                                                                                           | -3307    | RAB26                               | RAB26        |
| cg10785537 | 2.07E-08 | 5.06E-06 | 6.18918  | 2   | 74603226 | TSS1500;TSS1500;Body;Body;Body;Body;Body                                                                  | -1364    | DCTN1                               | DCTN1        |
| cg12867037 | 2.08E-08 | 5.06E-06 | 6.188633 | 2   | 1.77E+08 | TSS5000                                                                                                   | -5121    | LOC401021                           | HOXD-AS2     |
| cg14260004 | 2.08E-08 | 5.06E-06 | 6.188601 | 1   | 2.33E+08 |                                                                                                           | -41556   |                                     | SIPA1L2      |
| cg08258494 | 2.09E-08 | 5.08E-06 | 6.187671 | 1   | 2.4E+08  | Body;Body                                                                                                 | 75828    | CHRM3                               | CHRM3-AS1    |
| cg24140200 | 2.09E-08 | 5.09E-06 | 6.187233 | 10  | 63422254 | TSS1500;TSS1500;TSS1500;TSS1500;TSS1500;TSS1500                                                           | -432     | CABCOCO1                            | CABCOCO1     |
| cg20252015 | 2.09E-08 | 5.09E-06 | 6.186994 | 1   | 64100814 | Body;Body;Body                                                                                            | 11928    | PGM1                                | PGM1         |
| cg02604524 | 2.11E-08 | 5.13E-06 | -6.18522 | 3   | 1.29E+08 | Body;Body;TSS1500;1stExon                                                                                 | 211      | KIAA1257;EFCC1                      | KIAA1257     |
| cg26628100 | 2.11E-08 | 5.13E-06 | 6.184866 | 16  | 1615017  | Body                                                                                                      | -15510   | IFT140                              | LOC105371046 |
| cg12697833 | 2.12E-08 | 5.14E-06 | 6.184048 | 11  | 1.33E+08 | Body;Body                                                                                                 | -271770  | OPCML                               | OPCML        |
| cg11283404 | 2.12E-08 | 5.14E-06 | 6.183925 | 8   | 42163265 | Body;Body;Body;Body;Body;Body                                                                             | -32746   | IKKB                                | POLB         |
| cg11126205 | 2.12E-08 | 5.14E-06 | 6.183868 | 12  | 89158050 |                                                                                                           | -183800  |                                     | KITLG        |
| cg20504417 | 2.12E-08 | 5.14E-06 | 6.183721 | 8   | 1.03E+08 |                                                                                                           | -23453   |                                     | UBR5         |
| cg05692585 | 2.12E-08 | 5.14E-06 | 6.183599 | 2   | 2.32E+08 | Body;TSS200                                                                                               | 99       | SPATA3-AS1;SPATA3                   | SPATA3-AS1   |
| cg18737136 | 2.12E-08 | 5.14E-06 | 6.183551 | 2   | 2.25E+08 | 1stExon;Body;1stExon;Body                                                                                 | 29754    | SERPINE2                            | SERPINE2     |
| cg10149582 | 2.13E-08 | 5.14E-06 | 6.183436 | 14  | 23846456 | TSS5000;TSS5000;5'UTR;5'UTR;5'UTR;5'UTR;5'UTR;TSS5000                                                     | 202      | IL25;CMTM5;MYH6                     | CMTM5        |
| cg09466190 | 2.13E-08 | 5.15E-06 | 6.182965 | 4   | 1.2E+08  |                                                                                                           | -5910    |                                     | SEC24D       |
| cg19014245 | 2.13E-08 | 5.15E-06 | 6.182781 | 7   | 64333138 |                                                                                                           | -30481   |                                     | ZNF273       |
| cg07751753 | 2.14E-08 | 5.16E-06 | 6.182371 | 2   | 1.1E+08  | Body                                                                                                      | 24133    | SH3RF3                              | MIR4266      |
| cg11617965 | 2.15E-08 | 5.18E-06 | 6.181354 | 7   | 47962164 | Body                                                                                                      | 25924    | PKD1L1                              | PKD1L1       |
| cg05887749 | 2.15E-08 | 5.18E-06 | 6.181202 | 16  | 88097594 | Body;Body;Body;Body;Body;Body                                                                             | 36997    | BANP                                | LOC400553    |
| cg16474647 | 2.15E-08 | 5.19E-06 | 6.180731 | 6   | 31625159 | TSS5000;TSS5000;TSS5000;TSS5000;TSS5000;TSS5000;Body;Body;TSS5000;TSS5000;TSS5000;TSS5000;TSS5000;TSS5000 | 1489     | BAG6;APOM;C6orf47;GPANK1            | APOM         |
| cg02961385 | 2.15E-08 | 5.19E-06 | 6.18046  | 19  | 18872019 | Body;Body                                                                                                 | 30095    | CRTC1                               | COMP         |
| cg07071809 | 2.15E-08 | 5.19E-06 | 6.180304 | 7   | 1585771  | TSS5000;3'UTR                                                                                             | 10070    | MAFK;TMEM184A                       | TMEM184A     |
| cg04053571 | 2.16E-08 | 5.19E-06 | 6.180225 | 12  | 1.33E+08 | Body;TSS5000                                                                                              | -4206    | GALNT9;LOC100130238                 | LOC100130238 |
| cg09308502 | 2.16E-08 | 5.19E-06 | 6.180209 | 11  | 1.19E+08 |                                                                                                           | -6251    |                                     | CCDC84       |
| cg09304624 | 2.16E-08 | 5.19E-06 | 6.180169 | 8   | 75735733 | TSS1500;TSS1500                                                                                           | -1035    | PI15                                | PI15         |
| cg05081514 | 2.16E-08 | 5.19E-06 | 6.179973 | 8   | 1.43E+08 | Body;Body;Body;Body;Body;Body                                                                             | 71414    | TSNARE1                             | TSNARE1      |
| cg22837726 | 2.16E-08 | 5.19E-06 | -6.17994 | 19  | 7565953  | 1stExon                                                                                                   | 3520     | TEX45                               | TEX45        |
| cg18741586 | 2.17E-08 | 5.20E-06 | 6.179177 | 3   | 52868999 | TSS5000;TSS5000;5'UTR;Body;TSS5000                                                                        | 36       | ITIH4;MUSTN1;STIMATE-MUSTN1;STIMATE | MUSTN1       |
| cg01535312 | 2.17E-08 | 5.20E-06 | 6.178976 | 6   | 39903199 | TSS1500;TSS1500;TSS1500;TSS1500;TSS1500;TSS1500;TSS1500                                                   | -998     | MOCS1                               | MOCS1        |
| cg24133771 | 2.17E-08 | 5.20E-06 | 6.178947 | 17  | 80769004 | Body                                                                                                      | 28894    | TBCD                                | ZNF750       |
| cg06840723 | 2.17E-08 | 5.20E-06 | 6.178716 | 15  | 52484492 | TSS1500;Body;TSS5000                                                                                      | -903     | GNB5;CERNA1;MYO5C                   | GNB5         |
| cg03406011 | 2.17E-08 | 5.21E-06 | 6.178519 | 3   | 1.29E+08 | TSS1500;Body;TSS5000;Body                                                                                 | -861     | KIAA1257;EFCC1                      | KIAA1257     |
| cg12043732 | 2.18E-08 | 5.21E-06 | 6.177986 | 20  | 61284223 | Body                                                                                                      | 10369    | SLCO4A1                             | SLCO4A1      |
| cg07987051 | 2.18E-08 | 5.22E-06 | 6.17784  | 16  | 5080405  | Body;TSS5000                                                                                              | -3297    | NAGPA;NAGPA-AS1                     | NAGPA-AS1    |
| cg02269496 | 2.18E-08 | 5.22E-06 | 6.177408 | 13  | 1.13E+08 |                                                                                                           | 74614    |                                     | SPACA7       |
| cg27577993 | 2.19E-08 | 5.22E-06 | 6.177109 | 7   | 1.51E+08 | Body;Body                                                                                                 | -21395   | PRKAG2                              | PRKAG2       |
| cg00650672 | 2.19E-08 | 5.22E-06 | 6.177046 | 3   | 65764475 | Body;Body;Body;Body;Body;Body                                                                             | -115015  | MAGI1                               | MAGI1-AS1    |
| cg10648623 | 2.19E-08 | 5.22E-06 | 6.177006 | 7   | 89866283 | 3'UTR;3'UTR;3'UTR;3'UTR;3'UTR;3'UTR                                                                       | -8204    | STEAP2                              | CFAP69       |
| cg17917368 | 2.19E-08 | 5.23E-06 | 6.176636 | 3   | 1.28E+08 | TSS5000                                                                                                   | 7959     | LINC01565                           | LINC01565    |
| cg15106420 | 2.20E-08 | 5.24E-06 | 6.175908 | 5   | 1.09E+08 | Body                                                                                                      | 17171    | MAN2A1                              | MAN2A1       |
| cg06924081 | 2.20E-08 | 5.24E-06 | 6.175696 | 15  | 69791774 |                                                                                                           | 46618    |                                     | RPLP1        |
| cg25790955 | 2.20E-08 | 5.25E-06 | 6.175481 | 11  | 73202336 | Body;Body;Body                                                                                            | 106821   | FAM168A                             | FAM168A      |
| cg00629700 | 2.20E-08 | 5.25E-06 | 6.175118 | 17  | 30190328 | TSS5000;TSS5000;3'UTR                                                                                     | -4065    | COPRS;UTP6                          | COPRS        |
| cg25135145 | 2.20E-08 | 5.25E-06 | 6.175111 | 3   | 16233024 | Body;Body                                                                                                 | 16838    | GALNT15                             | GALNT15      |
| cg22191973 | 2.20E-08 | 5.25E-06 | 6.175094 | 18  | 55292558 | TSS5000                                                                                                   | -3490    | NARS1                               | NARS1        |
| cg18309674 | 2.21E-08 | 5.25E-06 | 6.174979 | 14  | 1.05E+08 |                                                                                                           | -8442    |                                     | CDC44        |
| cg14737905 | 2.21E-08 | 5.26E-06 | 6.174127 | 2   | 1.28E+08 | Body;TSS5000                                                                                              | -4984    | PROC;MIR4783                        | MIR4783      |
| cg05997793 | 2.22E-08 | 5.28E-06 | 6.173435 | 3   | 37901338 | Body;Body;TSS5000;TSS5000                                                                                 | 1933     | ITGA9-AS1;CTDSPL                    | ITGA9-AS1    |
| cg05348188 | 2.22E-08 | 5.28E-06 | 6.173314 | 21  | 45877268 | TSS5000;1stExon                                                                                           | 1876     | LRR3-DT;LRR3                        | LRR3         |
| cg07899634 | 2.22E-08 | 5.28E-06 | 6.173178 | 6   | 33234620 | Body;Body;Body;Body                                                                                       | 5033     | VPS52                               | VPS52        |

| Probe      | p_adj    | q_val    | t        | Chr | Pos.hg19 | locations                                                         | dist2TSS | gene.Illumina             | gene.nearest |
|------------|----------|----------|----------|-----|----------|-------------------------------------------------------------------|----------|---------------------------|--------------|
| cg00495305 | 2.22E-08 | 5.28E-06 | 6.173054 | 3   | 43659797 | Body;Body;Body;Body;Body;Body;Body;Body;Body;Body;Body            | 3621     | ANO10                     | ANO10        |
| cg21230284 | 2.23E-08 | 5.28E-06 | 6.172892 | 4   | 1660919  | Body;Body;Body                                                    | 24799    | FAM53A                    | FAM53A       |
| cg02041108 | 2.23E-08 | 5.29E-06 | 6.172348 | 5   | 35946185 | TESS000                                                           | 7283     | UGT3A1                    | LOC100506406 |
| cg11523960 | 2.24E-08 | 5.30E-06 | 6.171758 | 5   | 88004111 | Body                                                              | -17253   | MEF2C-AS2                 | LINC00461    |
| cg16194160 | 2.24E-08 | 5.30E-06 | 6.171633 | 8   | 1.45E+08 | Body;Body;Body                                                    | 3454     | PARP10                    | PARP10       |
| cg07539121 | 2.24E-08 | 5.30E-06 | 6.171337 | 5   | 55606711 |                                                                   | -77554   | ANKRD55                   | ANKRD55      |
| cg00598956 | 2.24E-08 | 5.30E-06 | 6.171298 | 4   | 77409957 | Body                                                              | 53576    | SHROOM3                   | SHROOM3      |
| cg04813711 | 2.24E-08 | 5.30E-06 | 6.171061 | 16  | 57597905 | Body;Body;Body                                                    | 21351    | ADGRG5                    | ADGRG5       |
| cg01030178 | 2.25E-08 | 5.31E-06 | 6.170757 | 8   | 67037892 | TSS1500;TSS1500;TSS1500;TSS1500                                   | -1471    | TRIM55                    | TRIM55       |
| cg21898299 | 2.25E-08 | 5.31E-06 | 6.170682 | 15  | 68924220 | Body;Body;Body;TSS200                                             | -106     | CORO2B                    | CORO2B       |
| cg26893743 | 2.25E-08 | 5.31E-06 | 6.17053  | 5   | 1.54E+08 | Body                                                              | 22813    | GALNT10                   | MIR1294      |
| cg19692314 | 2.25E-08 | 5.31E-06 | 6.170146 | 1   | 45042285 | Body;Body;Body                                                    | 31121    | RNF220                    | MIR5584      |
| cg25651608 | 2.25E-08 | 5.31E-06 | 6.169978 | 3   | 42073868 |                                                                   | -54823   | TRAK1                     | TRAK1        |
| cg03994274 | 2.26E-08 | 5.32E-06 | 6.169585 | 8   | 1.03E+08 | Body;Body                                                         | 65788    | GRHL2                     | GRHL2        |
| cg04398275 | 2.26E-08 | 5.32E-06 | 6.169331 | 12  | 1.24E+08 | Body;Body                                                         | 14573    | SBNO1                     | MIR8072      |
| cg04093821 | 2.26E-08 | 5.32E-06 | 6.169254 | 2   | 38247975 | TESS000;Body;TESS000;Body;TESS000;Body                            | 15509    | RMDN2;RMDN2-AS1           | RMDN2-AS1    |
| cg06411137 | 2.26E-08 | 5.33E-06 | 6.169034 | 11  | 20390803 | Body;Body;Body;Body;TESS000                                       | 5117     | HTATIP2                   | HTATIP2      |
| cg20987283 | 2.27E-08 | 5.33E-06 | 6.168549 | 8   | 1.36E+08 | Body                                                              | 1137     | LOC101927845              | LOC101927845 |
| cg16100530 | 2.27E-08 | 5.33E-06 | 6.168328 | 15  | 84146864 | Body;Body;Body;Body;Body;Body;Body;Body;Body;Body;Body;Body       | -12501   | SH3GL3                    | SH3GL3       |
| cg12072770 | 2.27E-08 | 5.33E-06 | 6.168263 | 10  | 1995014  |                                                                   | 61528    | LINC00700                 | LINC00700    |
| cg25208740 | 2.27E-08 | 5.34E-06 | 6.168001 | 15  | 42780090 | Body;Body;Body;Body                                               | 3249     | ZNF106                    | ZNF106       |
| cg12523691 | 2.27E-08 | 5.34E-06 | 6.167934 | 4   | 1.7E+08  | Body;Body;Body                                                    | -35564   | PALLD                     | PALLD        |
| cg22158175 | 2.28E-08 | 5.35E-06 | 6.16738  | 6   | 32809475 | TSS5000;TSS5000;Body;Body;TSS5000;TSS5000;TSS5000;TSS5000;TSS5000 | 2349     | TAP2;PSMB8;PSMB8-AS1;TAP1 | PSMB8        |
| cg05036120 | 2.28E-08 | 5.35E-06 | 6.167292 | 1   | 2.13E+08 | 3'UTR;3'UTR;3'UTR;3'UTR;3'UTR;TSS5000                             | -4532    | ATF3;FAM71A               | FAM71A       |
| cg19751824 | 2.28E-08 | 5.35E-06 | 6.167076 | 11  | 1.25E+08 | Body                                                              | -30174   | FEZ1                      | LOC403312    |
| cg20181262 | 2.28E-08 | 5.35E-06 | 6.167008 | 12  | 1.32E+08 | Body;Body                                                         | -28981   | SFSWAP                    | MMP17        |
| cg19350970 | 2.28E-08 | 5.35E-06 | 6.166955 | 2   | 2.38E+08 |                                                                   | 44617    | COPS8                     | COPS8        |
| cg04226002 | 2.29E-08 | 5.35E-06 | 6.166708 | 11  | 1.14E+08 | Body;Body;Body;Body;Body                                          | 19530    | ZBTB16                    | ZBTB16       |
| cg01584939 | 2.29E-08 | 5.35E-06 | 6.166424 | 22  | 37254322 | Body;TSS5000;TSS5000                                              | -2707    | NCF4-AS1;NCF4             | NCF4         |
| cg14122749 | 2.29E-08 | 5.36E-06 | 6.165941 | 12  | 64355151 | Body;Body                                                         | 116672   | SRGAP1                    | SRGAP1       |
| cg06736674 | 2.29E-08 | 5.36E-06 | 6.165934 | 6   | 1.67E+08 | Body                                                              | 646      | LOC729681                 | LOC729681    |
| cg05790630 | 2.30E-08 | 5.36E-06 | 6.165684 | 3   | 64963168 | Body                                                              | -289492  | ADAMTS9-AS2               | ADAMTS9      |
| cg10840135 | 2.30E-08 | 5.36E-06 | 6.165556 | 22  | 42526619 | 1stExon;1stExon                                                   | 193      | CYP2D6                    | CYP2D6       |
| cg05834191 | 2.30E-08 | 5.36E-06 | 6.165549 | 14  | 1.06E+08 | Body;Body                                                         | -20592   | MTA1                      | CRIP2        |
| cg08732428 | 2.31E-08 | 5.38E-06 | 6.164503 | 1   | 55243019 | TESS000                                                           | -12823   | TTC22                     | PARS2        |
| cg00044466 | 2.31E-08 | 5.38E-06 | 6.164054 | 16  | 15238525 |                                                                   | 10334    | MIR3180-4                 | MIR3180-4    |
| cg04104695 | 2.31E-08 | 5.38E-06 | 6.164039 | 5   | 1.39E+08 | Body;Body;Body;Body;Body;Body;Body;Body;Body;Body;Body;Body       | 3722     | CXXC5                     | CXXC5        |
| cg26187724 | 2.31E-08 | 5.38E-06 | 6.163994 | 6   | 3697798  |                                                                   | 54448    | PXDC1                     | PXDC1        |
| cg09817985 | 2.32E-08 | 5.39E-06 | 6.163831 | 20  | 25054507 | Body;Body;Body;Body;TESS000;TESS000                               | 8508     | VSX1                      | VSX1         |
| cg21609154 | 2.32E-08 | 5.39E-06 | 6.163705 | 13  | 1.14E+08 | TSS5000;Body;Body                                                 | 1118     | MCF2L-AS1;MCF2L           | MCF2L        |
| cg09970511 | 2.32E-08 | 5.39E-06 | 6.163521 | 6   | 56823640 | TSS5000;Body;Body                                                 | 3736     | DST;BEND6                 | BEND6        |
| cg07850832 | 2.32E-08 | 5.39E-06 | 6.163355 | 5   | 37378050 | TSS1500;TSS1500;TSS1500                                           | -1369    | WDR70                     | WDR70        |
| cg25050479 | 2.32E-08 | 5.39E-06 | 6.163247 | 11  | 45718671 |                                                                   | -5345    | MIR7154                   | MIR7154      |
| cg04988367 | 2.33E-08 | 5.40E-06 | 6.16277  | 5   | 10933006 |                                                                   | -171660  | DAP                       | DAP          |
| cg14328415 | 2.33E-08 | 5.40E-06 | 6.162577 | 9   | 1.4E+08  | Body                                                              | 590      | LCN12                     | LCN12        |
| cg00310792 | 2.33E-08 | 5.40E-06 | 6.16242  | 4   | 1.48E+08 | 1stExon;Body;Body;Body                                            | 3217     | TTC29                     | TTC29        |
| cg12852139 | 2.33E-08 | 5.41E-06 | 6.161941 | 5   | 16794882 | Body                                                              | 141515   | MYO10                     | MYO10        |
| cg04158698 | 2.34E-08 | 5.41E-06 | 6.161893 | 1   | 2.02E+08 |                                                                   | 34010    | RPS10P7                   | RPS10P7      |
| cg13315130 | 2.35E-08 | 5.44E-06 | 6.160456 | 22  | 21045582 | Body                                                              | 1740     | POM121L4P                 | POM121L4P    |
| cg08453263 | 2.35E-08 | 5.44E-06 | 6.160078 | 11  | 16838675 | Body;Body;Body                                                    | 78482    | PLEKHA7                   | C11orf58     |
| cg15318814 | 2.36E-08 | 5.45E-06 | 6.159575 | 2   | 98351769 | Body;Body                                                         | 901      | ZAP70                     | ZAP70        |
| cg16720847 | 2.37E-08 | 5.48E-06 | 6.158383 | 12  | 42854129 | Body;Body;Body;Body                                               | 23288    | PRICKLE1                  | PRICKLE1     |
| cg13893221 | 2.37E-08 | 5.48E-06 | 6.158134 | 15  | 85199995 | TSS5000;TSS5000;TSS5000;TSS5000;Body;Body                         | 1435     | WDR73;NMB                 | NMB          |
| cg20216030 | 2.38E-08 | 5.49E-06 | 6.157504 | 10  | 1.34E+08 | Body                                                              | 10653    | BNIP3                     | BNIP3        |
| cg13296809 | 2.39E-08 | 5.50E-06 | 6.157025 | 11  | 69709095 |                                                                   | -74911   | FGF3                      | FGF3         |
| cg04522821 | 2.39E-08 | 5.50E-06 | 6.156863 | 19  | 54041329 | Body;Body;Body;TSS200;TSS200;TSS200;TSS200;TSS1500                | -69      | ZNF331                    | ZNF331       |
| cg00672802 | 2.39E-08 | 5.50E-06 | 6.156832 | 1   | 2.26E+08 |                                                                   | 25596    | LINC01703                 | LINC01703    |
| cg24829772 | 2.39E-08 | 5.50E-06 | 6.156829 | 8   | 18577488 | Body;Body;Body                                                    | 88889    | PSD3                      | PSD3         |
| cg10397819 | 2.39E-08 | 5.50E-06 | 6.156431 | 14  | 75447512 |                                                                   | -22111   | EIF2B2                    | EIF2B2       |
| cg01553613 | 2.40E-08 | 5.52E-06 | 6.155777 | 14  | 77734687 | Body;TESS000                                                      | 2127     | NGB;MIR1260A              | MIR1260A     |

| Probe      | p_adj    | q_val    | t        | Chr | Pos.hg19 | locations                                                      | dist2TSS | gene.Illumina                        | gene.nearest |
|------------|----------|----------|----------|-----|----------|----------------------------------------------------------------|----------|--------------------------------------|--------------|
| cg18909596 | 2.40E-08 | 5.52E-06 | 6.155715 | 8   | 1.41E+08 | Body;Body;Body                                                 | -28960   | TRAPPC9                              | KCNK9        |
| cg01131388 | 2.40E-08 | 5.52E-06 | 6.155423 | 3   | 1.58E+08 |                                                                | 275441   |                                      | SHOX2        |
| cg05625955 | 2.41E-08 | 5.52E-06 | 6.155082 | 6   | 1.71E+08 | TESS000                                                        |          | 10663                                | LOC154449    |
| cg24381587 | 2.41E-08 | 5.52E-06 | 6.15508  | 1   | 1.59E+08 | Body                                                           | 160      | OR6N1                                | OR6N1        |
| cg10932916 | 2.41E-08 | 5.53E-06 | 6.15446  | 5   | 1.66E+08 |                                                                | 828284   |                                      | LINC01947    |
| cg24716420 | 2.41E-08 | 5.53E-06 | 6.154387 | 4   | 7802369  | Body;Body;Body;Body                                            |          | 46553                                | AFAP1        |
| cg19955284 | 2.41E-08 | 5.53E-06 | 6.154349 | 6   | 31833747 | TSS5000;Body;Body;Body                                         | -3149    | NEU1;SLC44A4                         | NEU1         |
| cg22136329 | 2.41E-08 | 5.53E-06 | 6.154208 | 7   | 27296033 |                                                                | -9185    |                                      | EVX1-AS      |
| cg25246281 | 2.42E-08 | 5.53E-06 | 6.153923 | 17  | 27188748 | TESS000;TESS000;TESS000;TESS000;TESS1500;TESS000;TESS200;Body  | 0        | ERAL1;MIR451A;MIR451B;MIR144;MIR4732 | MIR4732      |
| cg18893868 | 2.42E-08 | 5.53E-06 | 6.153888 | 12  | 1.31E+08 | Body;Body;Body;Body;Body;Body;Body;Body                        | 132284   | RIMBP2                               | PIWIL1       |
| cg13683507 | 2.43E-08 | 5.55E-06 | -6.15305 | 10  | 1463108  | Body                                                           | -105716  | ADARB2                               | ADARB2-AS1   |
| cg05614408 | 2.43E-08 | 5.56E-06 | 6.152609 | 5   | 94901279 | Body                                                           | 10475    | ARSK                                 | ARSK         |
| cg23947050 | 2.43E-08 | 5.56E-06 | 6.152308 | 13  | 26046175 | Body;Body                                                      | 3264     | ATP8A2                               | ATP8A2       |
| cg26656387 | 2.44E-08 | 5.56E-06 | 6.152233 | 13  | 74356270 | Body                                                           | 217890   | KLF12                                | LINC00392    |
| cg19102120 | 2.44E-08 | 5.56E-06 | 6.152138 | 5   | 1.18E+08 |                                                                | -178135  |                                      | MIR1244-2    |
| cg22514764 | 2.44E-08 | 5.56E-06 | 6.152123 | 1   | 2.44E+08 | Body;Body;Body;Body;Body;Body                                  | 128361   | SDCCAG8                              | MIR4677      |
| cg20899625 | 2.44E-08 | 5.56E-06 | 6.152072 | 3   | 1.27E+08 | Body                                                           | 13695    | PLXNA1                               | PLXNA1       |
| cg22802461 | 2.44E-08 | 5.57E-06 | 6.151486 | 19  | 35981531 | TSS200;TSS200                                                  | -165     | KRTDAP                               | KRTDAP       |
| cg20775508 | 2.45E-08 | 5.57E-06 | 6.151302 | 20  | 44996230 | TSS5000;TSS5000;TSS5000;TSS5000;TSS5000;TSS5000;Body;Body;Body | -3133    | SLC35C2;ELMO2                        | SLC35C2      |
| cg05780864 | 2.45E-08 | 5.57E-06 | 6.151053 | 8   | 1.41E+08 | Body;Body                                                      | 82581    | KCNK9                                | KCNK9        |
| cg03805019 | 2.45E-08 | 5.58E-06 | 6.15052  | 20  | 62464090 | TSS1500                                                        | -1473    | ZBTB46                               | ZBTB46       |
| cg26161024 | 2.46E-08 | 5.59E-06 | 6.150381 | 1   | 27693840 | TSS1500;TSS1500;TSS5000;TESS000                                | -388     | MAP3K6;FCN3                          | MAP3K6       |
| cg13256598 | 2.46E-08 | 5.60E-06 | 6.149748 | 4   | 5624571  | Body;Body                                                      | 85715    | EVC2                                 | EVC2         |
| cg01572468 | 2.47E-08 | 5.60E-06 | 6.149127 | 11  | 75225065 | Body;Body                                                      | 11553    | GDPD5                                | GDPD5        |
| cg20152382 | 2.47E-08 | 5.60E-06 | 6.149024 | 17  | 64783099 | Body;TSS200                                                    | -90      | PRKCA;MIR634                         | MIR634       |
| cg26674132 | 2.47E-08 | 5.60E-06 | 6.148946 | 19  | 9434637  | 5'UTR;5'UTR;5'UTR;5'UTR;5'UTR;5'UTR;TSS1500;TSS1500;TSS1500    | 190      | ZNF559;ZNF559-ZNF177                 | ZNF559       |
| cg14780276 | 2.47E-08 | 5.60E-06 | 6.148888 | 4   | 1.49E+08 | Body                                                           | 39455    | ARHGAP10                             | MIR4799      |
| cg20902353 | 2.47E-08 | 5.60E-06 | 6.148887 | 14  | 94425114 | TSS5000;Body                                                   | -1721    | ASB2                                 | ASB2         |
| cg27623914 | 2.47E-08 | 5.60E-06 | 6.148607 | 17  | 21355856 |                                                                | 76188    |                                      | KCNJ12       |
| cg05465059 | 2.47E-08 | 5.60E-06 | 6.148549 | 11  | 45672555 | Body                                                           | 14617    | CHST1                                | CHST1        |
| cg08061360 | 2.48E-08 | 5.60E-06 | 6.148493 | 19  | 51917747 | Body;Body;Body;Body;Body;Body;Body;TSS1500;TSS1500             | -1230    | SIGLEC10;LOC100129083                | LOC100129083 |
| cg15369608 | 2.48E-08 | 5.60E-06 | 6.14842  | 2   | 2.4E+08  | Body                                                           | 15390    | HDAC4                                | MIR4440      |
| cg11031372 | 2.48E-08 | 5.61E-06 | 6.148109 | 17  | 79173614 | Body;Body;Body;Body                                            | 23151    | CEP131                               | CEP131       |
| cg23192479 | 2.49E-08 | 5.62E-06 | 6.147531 | 2   | 1.1E+08  | Body                                                           | -21625   | SH3RF3                               | MIR4266      |
| cg17543112 | 2.49E-08 | 5.62E-06 | 6.147316 | 5   | 1.32E+08 | Body;Body                                                      | 947      | PDLIM4                               | PDLIM4       |
| cg06024642 | 2.49E-08 | 5.62E-06 | 6.147192 | 17  | 4510776  | Body;Body;TSS5000                                              | -2967    | SMTNL2;LINC01996                     | LINC01996    |
| cg06504039 | 2.50E-08 | 5.64E-06 | 6.146426 | 6   | 32978379 | TSS1500                                                        | -1011    | HLA-DOA                              | HLA-DOA      |
| cg00998379 | 2.50E-08 | 5.64E-06 | 6.146311 | 1   | 53074332 | 3'UTR                                                          | 6290     | GPX7                                 | GPX7         |
| cg00016968 | 2.50E-08 | 5.64E-06 | 6.146132 | 1   | 1.13E+08 | TSS1500;TSS1500;TSS1500;TESS000                                | -423     | RHOC;PPM1J                           | RHOC         |
| cg19808587 | 2.50E-08 | 5.64E-06 | 6.146052 | 1   | 28520874 | TSS1500;TSS1500                                                | -427     | PTAFR                                | PTAFR        |
| cg13427810 | 2.50E-08 | 5.64E-06 | 6.145973 | 9   | 1.17E+08 | Body                                                           | 18923    | COL27A1                              | MIR455       |
| cg12586179 | 2.51E-08 | 5.65E-06 | 6.145413 | 17  | 80349858 | 3'UTR;3'UTR;Body                                               | 17706    | OGFOD3                               | UTS2R        |
| cg27252367 | 2.51E-08 | 5.65E-06 | 6.145284 | 11  | 71313287 |                                                                | -19366   |                                      | KRTAP5-11    |
| cg20749005 | 2.51E-08 | 5.65E-06 | 6.14493  | 8   | 1.41E+08 | Body;Body;Body                                                 | 160627   | TRAPPC9                              | PEG13        |
| cg26354398 | 2.52E-08 | 5.65E-06 | 6.144803 | 9   | 1.16E+08 | Body;TSS5000;TSS5000                                           | -1943    | RG53                                 | RG53         |
| cg27607136 | 2.52E-08 | 5.65E-06 | 6.144605 | 11  | 1857442  | Body;Body;Body;Body;TSS5000;TSS5000;TSS5000                    | 1786     | SYT8;TNNI2                           | SYT8         |
| cg19833679 | 2.52E-08 | 5.65E-06 | 6.144479 | 22  | 41636941 | TSS200;TESS000;TESS000;TESS000                                 | -6       | CHADL;RANGAP1                        | CHADL        |
| cg09950164 | 2.52E-08 | 5.65E-06 | 6.144476 | 11  | 65984109 | Body                                                           | -40655   | PACS1                                | KLC2         |
| cg20227165 | 2.52E-08 | 5.65E-06 | 6.144437 | 11  | 45115819 | Body                                                           | 256      | PRDM11                               | PRDM11       |
| cg26353161 | 2.52E-08 | 5.65E-06 | 6.144309 | 7   | 28331380 |                                                                | -7559    |                                      | CREB5        |
| cg25981875 | 2.53E-08 | 5.66E-06 | 6.143942 | 6   | 31860696 | Body;Body;Body;Body;Body;TSS5000                               | 4070     | EHMT2;C2                             | EHMT2        |
| cg14891651 | 2.53E-08 | 5.67E-06 | 6.143503 | 11  | 3690320  | TESS000;Body;Body;Body                                         | 2294     | ART1;CHRNA10                         | CHRNA10      |
| cg20259594 | 2.54E-08 | 5.68E-06 | 6.142877 | 3   | 15920154 | TESS000                                                        | 4877     | MIR563                               | MIR563       |
| cg16989443 | 2.54E-08 | 5.68E-06 | 6.142779 | 1   | 1849195  | TESS000;TESS000;3'UTR;TESS000                                  | 1523     | CALML6;TMEM52;CFAP74                 | TMEM52       |
| cg08684854 | 2.54E-08 | 5.68E-06 | 6.142697 | 16  | 30955244 | Body;Body                                                      | -5144    | FBXL19                               | Orai3        |
| cg15161225 | 2.54E-08 | 5.69E-06 | 6.142187 | 22  | 36013678 | TSS1500;TSS200;Body;Body                                       | -123     | MB                                   | MB           |
| cg11598561 | 2.55E-08 | 5.69E-06 | 6.142013 | 3   | 1.28E+08 | 3'UTR;TSS1500                                                  | -1114    | DNAJB8;DNAJB8-AS1                    | DNAJB8-AS1   |
| cg09578614 | 2.55E-08 | 5.69E-06 | 6.141976 | 16  | 68405406 | 1stExon                                                        | 60390    | SMPD3                                | PRMT7        |
| cg21504353 | 2.56E-08 | 5.71E-06 | 6.141012 | 22  | 24577288 | TESS000;TESS000;TESS000;TSS200                                 | -166     | CABIN1;SUSD2                         | SUSD2        |

| Probe      | p_adj    | q_val    | t        | Chr | Pos.hg19 | locations                                                                       | dist2TSS | gene.Illumina                                     | gene.nearest |
|------------|----------|----------|----------|-----|----------|---------------------------------------------------------------------------------|----------|---------------------------------------------------|--------------|
| cg23210309 | 2.56E-08 | 5.71E-06 | 6.140926 | 10  | 70232583 | TSS1500;TSS1500                                                                 | -705     | DNA2                                              | DNA2         |
| cg09585195 | 2.56E-08 | 5.71E-06 | 6.140907 | 16  | 2016875  | TESS5000;TSS5000;TSS5000;TSS5000;TSS5000;5'UTR;5'UTR                            | 19       | NDUFB10;RPS2;SNORA10;SNORA64;SNHG9;SNORA78;RNF151 | RNF151       |
| cg25786651 | 2.56E-08 | 5.71E-06 | 6.140729 | 7   | 1.51E+08 | TSS200;TSS200;Body;TESS000                                                      | -8       | ASB10;IQCA1L                                      | ASB10        |
| cg16173775 | 2.56E-08 | 5.71E-06 | 6.140601 | 1   | 32673381 | TESS000;TESS000;Body;Body;TSS1500                                               | -1313    | CCDC28B;IQCC;DCDC28                               | DCDC28       |
| cg27074221 | 2.56E-08 | 5.71E-06 | 6.1406   | 14  | 1.02E+08 | TESS000;TESS000;TESS000;TSS200                                                  | -11      | MIR494;MIR1193;MIR543;MIR495                      | MIR495       |
| cg22588275 | 2.59E-08 | 5.77E-06 | 6.13801  | 3   | 1.68E+08 | Body                                                                            | 23468    | EGFEM1P                                           | EGFEM1P      |
| cg02671333 | 2.59E-08 | 5.77E-06 | 6.138002 | 19  | 39806102 | TSS200                                                                          | -126     | LRFN1                                             | LRFN1        |
| cg14020326 | 2.59E-08 | 5.77E-06 | 6.1377   | 14  | 1.06E+08 | Body;Body;Body                                                                  | -39618   | PACS2                                             | BRF1         |
| cg06885284 | 2.60E-08 | 5.78E-06 | 6.137189 | 8   | 20010728 | Body;Body;Body;Body                                                             | 29919    | SLC18A1                                           | SLC18A1      |
| cg23040531 | 2.60E-08 | 5.78E-06 | 6.136991 | 10  | 1.32E+08 | Body;TESS000                                                                    | 4909     | EBF3;MIR4297                                      | MIR4297      |
| cg22759234 | 2.60E-08 | 5.78E-06 | 6.136958 | 17  | 62975582 | TSS5000                                                                         | -3879    | AMZ2P1                                            | AMZ2P1       |
| cg26158528 | 2.60E-08 | 5.78E-06 | 6.136925 | 1   | 28607681 | 3'UTR                                                                           | 21653    | SES2                                              | SES2         |
| cg21052025 | 2.61E-08 | 5.78E-06 | 6.136756 | 11  | 69001490 |                                                                                 | -60131   |                                                   | MYEOV        |
| cg09293816 | 2.61E-08 | 5.78E-06 | 6.136436 | 19  | 50015532 | TSS1500;TSS1500                                                                 | -385     | FCGRT                                             | FCGRT        |
| cg25498385 | 2.61E-08 | 5.78E-06 | 6.136331 | 13  | 21288714 | Body                                                                            | 11233    | IL17D                                             | IL17D        |
| cg12845177 | 2.61E-08 | 5.78E-06 | 6.136132 | 19  | 8650523  | Body;Body                                                                       | 6557     | ADAMTS10                                          | ADAMTS10     |
| cg14467840 | 2.61E-08 | 5.78E-06 | 6.136044 | 1   | 1.54E+08 | TSS1500;TSS1500;TSS1500;Body;5'UTR                                              | 63       | S100A13;S100A1                                    | S100A1       |
| cg02133510 | 2.61E-08 | 5.78E-06 | 6.136005 | 6   | 32044959 | Body;Body                                                                       | -31054   | TNXB                                              | TNXB         |
| cg23232719 | 2.62E-08 | 5.79E-06 | 6.135823 | 14  | 1.04E+08 | Body                                                                            | -31988   | TDRD9                                             | RD3L         |
| cg04165188 | 2.62E-08 | 5.79E-06 | 6.135458 | 8   | 840173   | Body;Body                                                                       | -6947    | DLGAP2                                            | LOC105377777 |
| cg19611163 | 2.62E-08 | 5.80E-06 | 6.135104 | 3   | 1.23E+08 | Body;Body;Body;Body;Body;Body                                                   | 2721     | MYLK;MYLK-AS2                                     | MYLK-AS2     |
| cg06070644 | 2.63E-08 | 5.80E-06 | 6.13494  | 4   | 25677759 | Body;Body;Body                                                                  | 19674    | SLC34A2                                           | SLC34A2      |
| cg17883035 | 2.64E-08 | 5.83E-06 | 6.133506 | 19  | 45261808 | Body;TSS200                                                                     | -105     | BCL3;MIR8085                                      | MIR8085      |
| cg23742669 | 2.64E-08 | 5.83E-06 | 6.133337 | 18  | 13642414 | Body;Body;Body;Body;Body;5'UTR                                                  | 658      | LDLRAD4                                           | LDLRAD4      |
| cg04657715 | 2.65E-08 | 5.83E-06 | 6.133217 | 3   | 99904527 | TESS000;TSS200;TSS200                                                           | -140     | CMSS1;TMEM30CP                                    | TMEM30CP     |
| cg09386620 | 2.65E-08 | 5.83E-06 | 6.133163 | 2   | 2.18E+08 | Body                                                                            | 84350    | DIRC3                                             | DIRC3-AS1    |
| cg25012649 | 2.65E-08 | 5.83E-06 | 6.133034 | 8   | 485766   | Body;Body                                                                       | 9079     | TDRP                                              | TDRP         |
| cg09629753 | 2.65E-08 | 5.83E-06 | 6.132914 | 16  | 29323721 | Body                                                                            | 10114    | SNX29P2                                           | SNX29P2      |
| cg05628390 | 2.65E-08 | 5.83E-06 | 6.132848 | 1   | 2259411  | Body                                                                            | 24689    | MORN1                                             | LOC100129534 |
| cg26313421 | 2.66E-08 | 5.85E-06 | 6.13217  | 2   | 47465189 | Body;Body                                                                       | -61114   | EPCAM-DT                                          | CALM2        |
| cg21127729 | 2.66E-08 | 5.85E-06 | 6.131952 | 7   | 1.28E+08 |                                                                                 | 34981    |                                                   | MIR593       |
| cg10912307 | 2.66E-08 | 5.85E-06 | 6.131736 | 22  | 50895738 | Body;Body                                                                       | 17726    | SBF1                                              | SBF1         |
| cg11855842 | 2.67E-08 | 5.86E-06 | 6.131461 | 1   | 23807492 | Body;Body                                                                       | 3180     | ASAP3                                             | ASAP3        |
| cg04981940 | 2.67E-08 | 5.86E-06 | 6.131361 | 1   | 1398348  | Body                                                                            | -8796    | ATAD3C                                            | ATAD3B       |
| cg01287505 | 2.68E-08 | 5.88E-06 | 6.130317 | 17  | 56607190 | Body;TSS5000;TSS1500;TSS1500;Body;Body;Body;Body;Body;TSS1500;TSS1500;Body;Body | -362     | SEPTIN4-AS1;SEPTIN4                               | SEPTIN4      |
| cg16068383 | 2.68E-08 | 5.88E-06 | 6.130247 | 15  | 56201496 | Body;Body;Body;Body;Body;Body;Body                                              | 7833     | NEDD4                                             | NEDD4        |
| cg01589587 | 2.68E-08 | 5.88E-06 | 6.130047 | 14  | 76002440 | Body                                                                            | 13629    | BATF                                              | BATF         |
| cg15369784 | 2.68E-08 | 5.88E-06 | 6.130029 | 6   | 36906565 |                                                                                 | -9473    |                                                   | PI16         |
| cg04125962 | 2.68E-08 | 5.88E-06 | 6.12985  | 16  | 27476250 | Body;Body                                                                       | -11536   | GTF3C1                                            | IL21R-AS1    |
| cg24482544 | 2.69E-08 | 5.88E-06 | 6.129815 | 1   | 1.6E+08  | Body                                                                            | 1102     | VANGL2                                            | VANGL2       |
| cg08861541 | 2.69E-08 | 5.88E-06 | 6.129676 | 11  | 2610149  | Body;Body                                                                       | 111079   | KCNQ1                                             | KCNQ1OT1     |
| cg19210342 | 2.69E-08 | 5.88E-06 | 6.12958  | 10  | 23640730 |                                                                                 | -7004    |                                                   | C10orf67     |
| cg01894322 | 2.70E-08 | 5.90E-06 | 6.128494 | 17  | 37789575 | Body;Body;Body;TSS5000;TSS5000;TSS5000                                          | -3757    | PPP1R1B;STARD3                                    | STARD3       |
| cg14210001 | 2.70E-08 | 5.90E-06 | 6.128309 | 12  | 1.25E+08 | Body;Body                                                                       | 143732   | ZNF664-RFLNA                                      | ZNF664-RFLNA |
| cg09452911 | 2.70E-08 | 5.90E-06 | 6.128227 | 2   | 69473156 | 3'UTR                                                                           | 141203   | ANTXR1                                            | GFPT1        |
| cg08393972 | 2.72E-08 | 5.93E-06 | 6.127095 | 4   | 2372832  | Body;Body;Body;Body                                                             | -6291    | ZFYVE28                                           | ZFYVE28      |
| cg04580068 | 2.72E-08 | 5.93E-06 | 6.126864 | 3   | 23590052 | Body;Body                                                                       | -257393  | UBE2E2                                            | UBE2E1       |
| cg01624768 | 2.73E-08 | 5.94E-06 | 6.126441 | 16  | 85465657 |                                                                                 | -125726  |                                                   | MIR5093      |
| cg10779202 | 2.73E-08 | 5.94E-06 | 6.126212 | 7   | 92626636 |                                                                                 | 120656   |                                                   | SAMD9        |
| cg18304839 | 2.73E-08 | 5.94E-06 | 6.126162 | 8   | 1246922  | Body;Body                                                                       | 3905     | DLGAP2;LOC286083                                  | LOC286083    |
| cg15485378 | 2.73E-08 | 5.95E-06 | 6.125816 | 3   | 52828680 | TESS000;TESS000;TESS000;TESS000;TSS200                                          | -103     | ITIH1;ITIH3                                       | ITIH3        |
| cg11090131 | 2.73E-08 | 5.95E-06 | 6.125771 | 16  | 354263   | Body;Body;Body                                                                  | 21100    | AXIN1                                             | PDIA2        |
| cg00653847 | 2.74E-08 | 5.95E-06 | 6.125513 | 10  | 1.02E+08 |                                                                                 | -6777    |                                                   | SCD          |
| cg09317036 | 2.75E-08 | 5.97E-06 | 6.124721 | 8   | 1.45E+08 | TSS200;TESS000;TSS5000                                                          | -9       | GSDMD;LOC100310756                                | GSDMD        |
| cg00472879 | 2.76E-08 | 5.99E-06 | 6.123722 | 10  | 97181896 | Body;Body;Body;Body;Body;Body;Body;Body;Body;Body                               | 19041    | SORBS1                                            | SORBS1       |
| cg02901002 | 2.76E-08 | 5.99E-06 | 6.123638 | 7   | 42001667 | 3'UTR                                                                           | -258979  | GLI3                                              | INHBA        |
| cg24332389 | 2.76E-08 | 5.99E-06 | 6.123618 | 1   | 6558085  | TSS1500;TSS1500;Body                                                            | -581     | PLEKHG5                                           | PLEKHG5      |
| cg09558069 | 2.76E-08 | 5.99E-06 | 6.123373 | 1   | 1.54E+08 | TSS5000;Body                                                                    | -2429    | S100A6;S100A5                                     | S100A6       |
| cg00459816 | 2.77E-08 | 6.01E-06 | 6.122695 | 17  | 37862113 | Body;Body;Body;Body;Body                                                        | 5883     | ERBB2                                             | ERBB2        |



[illegible]

| Probe      | p_adj    | q_val    | t        | Chr | Pos.hg19 | locations                                                   | dist2TSS | gene.Illumina  | gene.nearest |
|------------|----------|----------|----------|-----|----------|-------------------------------------------------------------|----------|----------------|--------------|
| cg05037360 | 3.15E-08 | 6.46E-06 | 6.093165 | 1   | 1.16E+08 | TSS200                                                      | -153     | CASQ2          | CASQ2        |
| cg06714705 | 3.15E-08 | 6.46E-06 | 6.093091 | 11  | 7506940  | Body;Body;5'UTR;TSS200;TSS200                               | -56      | OLFML1         | OLFML1       |
| cg23437810 | 3.15E-08 | 6.46E-06 | 6.092845 | 21  | 46816585 |                                                             | -8494    |                | COL18A1      |
| cg16911872 | 3.16E-08 | 6.46E-06 | 6.092608 | 7   | 1.53E+08 |                                                             | 134339   |                | ACTR3B       |
| cg14088119 | 3.16E-08 | 6.46E-06 | 6.092593 | 5   | 1.6E+08  | TSS1500;TSS1500                                             | -355     | LINC02159      | LINC02159    |
| cg08756885 | 3.16E-08 | 6.47E-06 | 6.092418 | 6   | 14178192 |                                                             | 60190    |                | CD83         |
| cg21660452 | 3.16E-08 | 6.47E-06 | 6.092116 | 11  | 64397807 | Body;Body;Body                                              | 13210    | NRXN2          | NRXN2        |
| cg02128981 | 3.17E-08 | 6.47E-06 | 6.091969 | 11  | 58904901 | Body                                                        | -5317    | FAM111A-DT     | FAM111A      |
| cg02029665 | 3.17E-08 | 6.47E-06 | 6.091957 | 22  | 46441799 | TSS1500                                                     | -1051    | LINC00899      | LINC00899    |
| cg27466235 | 3.17E-08 | 6.48E-06 | 6.091443 | 4   | 77625095 | Body                                                        | 128392   | SHROOM3        | MIR548AH     |
| cg03494692 | 3.17E-08 | 6.48E-06 | 6.091372 | 16  | 51498587 |                                                             | -297842  |                | LINC01571    |
| cg11338178 | 3.19E-08 | 6.50E-06 | 6.090554 | 3   | 72646997 |                                                             | 66403    |                | LOC105377162 |
| cg13116478 | 3.19E-08 | 6.50E-06 | 6.090433 | 1   | 9217203  | Body                                                        | -5367    | MIR34AHG       | MIR34A       |
| cg00682158 | 3.19E-08 | 6.50E-06 | 6.090237 | 6   | 1.6E+08  | Body;Body                                                   | 18363    | PNLDC1         | PNLDC1       |
| cg26700702 | 3.20E-08 | 6.52E-06 | 6.089651 | 16  | 1960348  | TSS000                                                      | 8068     | HS3ST6         | HS3ST6       |
| cg03141815 | 3.20E-08 | 6.52E-06 | 6.089649 | 7   | 1.02E+08 | Body;Body;Body;Body;Body;Body;Body                          | 219524   | CUX1           | CUX1         |
| cg11752320 | 3.20E-08 | 6.52E-06 | 6.089304 | 17  | 60741166 | Body                                                        | 36136    | MRC2           | MRC2         |
| cg04428290 | 3.21E-08 | 6.53E-06 | 6.089085 | 16  | 88883363 | Body;Body;Body                                              | -5027    | GALNS          | APRT         |
| cg03037620 | 3.21E-08 | 6.53E-06 | 6.088816 | 10  | 79699612 |                                                             | 13043    |                | DLG5-AS1     |
| cg01386335 | 3.21E-08 | 6.53E-06 | 6.088632 | 7   | 17704951 |                                                             | -106418  |                | LOC101927630 |
| cg20633203 | 3.22E-08 | 6.53E-06 | 6.088357 | 8   | 8239143  | 1stExon;1stExon;Body                                        | 4611     | PRAG1          | PRAG1        |
| cg22039287 | 3.22E-08 | 6.53E-06 | 6.088293 | 18  | 40696075 | TSS1500;TSS1500                                             | -418     | RIT2           | RIT2         |
| cg08835301 | 3.22E-08 | 6.53E-06 | 6.088276 | 7   | 30585918 | TSS000                                                      | 31477    | GARS-DT        | GARS-DT      |
| cg20220737 | 3.22E-08 | 6.53E-06 | 6.088254 | 8   | 1.33E+08 | Body                                                        | 9415     | OC90           | OC90         |
| cg06041759 | 3.22E-08 | 6.54E-06 | 6.087898 | 11  | 528924   | TSS000;TSS000;TSS000;TSS000                                 | 6643     | HRAS           | HRAS         |
| cg04614459 | 3.22E-08 | 6.54E-06 | 6.087833 | 10  | 1.04E+08 |                                                             | 23519    |                | TRIM8        |
| cg11060393 | 3.22E-08 | 6.54E-06 | 6.087686 | 20  | 50380560 | Body                                                        | 4369     | ATP9A          | ATP9A        |
| cg15061647 | 3.23E-08 | 6.54E-06 | 6.087665 | 7   | 1.58E+08 | Body;Body;Body;Body                                         | 76296    | PTPRN2         | MIR595       |
| cg23530031 | 3.23E-08 | 6.54E-06 | 6.087502 | 11  | 7541099  | Body;Body;Body;Body;Body;Body;Body                          | 5870     | PPFIBP2        | PPFIBP2      |
| cg07917546 | 3.23E-08 | 6.54E-06 | 6.087432 | 16  | 86496223 |                                                             | 46243    |                | FENDRR       |
| cg02225988 | 3.23E-08 | 6.54E-06 | 6.087337 | 8   | 1.41E+08 | Body;Body;Body                                              | -36978   | TRAPPC9        | PEG13        |
| cg04773926 | 3.23E-08 | 6.54E-06 | 6.087077 | 7   | 2697363  | Body                                                        | -21792   | TTYH3          | AMZ1         |
| cg16767170 | 3.23E-08 | 6.54E-06 | 6.087015 | 8   | 87351999 | TSS000                                                      | -2776    | WWP1           | WWP1         |
| cg00792251 | 3.24E-08 | 6.55E-06 | 6.086632 | 1   | 2.24E+08 | TSS1500                                                     | -389     | CAPN2          | CAPN2        |
| cg02414710 | 3.24E-08 | 6.55E-06 | 6.086404 | 1   | 2.33E+08 | 1stExon                                                     | 1212     | SIPA1L2        | SIPA1L2      |
| cg10848291 | 3.25E-08 | 6.55E-06 | 6.086251 | 6   | 73334702 | Body;Body;Body;Body;Body                                    | 3132     | KCNQ5          | KCNQ5        |
| cg26960224 | 3.25E-08 | 6.55E-06 | 6.086245 | 14  | 24509703 | Body;Body;Body;Body;Body;Body;Body                          | 4050     | DHRS4L1        | DHRS4L1      |
| cg24181174 | 3.25E-08 | 6.55E-06 | 6.085974 | 10  | 1.24E+08 | Body;Body;Body;Body;Body                                    | -22283   | TACC2          | TACC2        |
| cg22222644 | 3.25E-08 | 6.55E-06 | 6.085742 | 19  | 51883242 | 3'UTR;3'UTR                                                 | -7334    | LIM2           | NKG7         |
| cg05919312 | 3.25E-08 | 6.55E-06 | 6.085712 | 11  | 7694163  | TSS200;Body;Body;Body                                       | -41      | CYB5R2         | CYB5R2       |
| cg13577778 | 3.25E-08 | 6.55E-06 | 6.085685 | 14  | 69481517 |                                                             | 35119    |                | ACTN1-AS1    |
| cg06321213 | 3.25E-08 | 6.55E-06 | 6.085567 | 16  | 86009621 |                                                             | 57669    |                | MIR6774      |
| cg24524895 | 3.25E-08 | 6.55E-06 | 6.085563 | 15  | 90229590 | Body;Body;Body;TSS000;TSS000;TSS000                         | 4395     | PEX11A;WDR93   | PEX11A       |
| cg23677712 | 3.26E-08 | 6.55E-06 | 6.085317 | 2   | 9617768  | TSS000;TSS000;TSS000;TSS000;TSS000;Body;Body;Body;Body;Body | 2585     | CPSF3;IAH1     | IAH1         |
| cg08383930 | 3.26E-08 | 6.55E-06 | 6.085299 | 2   | 2.07E+08 |                                                             | 162927   |                | INO80D       |
| cg03344747 | 3.26E-08 | 6.55E-06 | 6.085245 | 13  | 43989172 | Body;Body;Body;Body;Body;Body;Body;Body;Body;Body;Body      | -33815   | ENOX1          | ENOX1-AS2    |
| cg22664152 | 3.26E-08 | 6.56E-06 | 6.084971 | 19  | 56726303 | TSS000;TSS000;TSS000;TSS000                                 | 9021     | ZSCAN5A        | ZSCAN5C      |
| cg23941077 | 3.27E-08 | 6.56E-06 | 6.084762 | 2   | 2.2E+08  | TSS000;Body;Body;Body                                       | 3560     | RNF25;STK36    | STK36        |
| cg12374353 | 3.27E-08 | 6.57E-06 | 6.084403 | 3   | 1.55E+08 | Body                                                        | 8516     | MME            | MME          |
| cg19732795 | 3.27E-08 | 6.57E-06 | 6.084318 | 2   | 71160396 | 3'UTR;TSS000                                                | -2633    | VAX2;ATP6V1B1  | ATP6V1B1     |
| cg11043918 | 3.28E-08 | 6.57E-06 | 6.083932 | 8   | 81191306 |                                                             | 37683    |                | MIR5708      |
| cg04132510 | 3.28E-08 | 6.58E-06 | 6.083509 | 1   | 3044741  | Body;Body;TSS000                                            | 203      | PRDM16;MIR4251 | MIR4251      |
| cg27175302 | 3.29E-08 | 6.59E-06 | 6.083205 | 4   | 71586685 | Body;TSS1500;TSS1500;TSS1500                                | -995     | RUFY3          | RUFY3        |
| cg02072002 | 3.29E-08 | 6.59E-06 | 6.08318  | 16  | 4736795  | Body;3'UTR;3'UTR;Body;Body                                  | -6898    | MGRN1          | NUDT16L1     |
| cg26899811 | 3.30E-08 | 6.60E-06 | 6.082625 | 1   | 2.03E+08 | 3'UTR;3'UTR;3'UTR                                           | -17947   | KDM5B          | SYT2         |
| cg00065385 | 3.30E-08 | 6.60E-06 | 6.0826   | 9   | 1.12E+08 | TSS1500                                                     | -1150    | ACTL7A         | ACTL7A       |
| cg00697970 | 3.31E-08 | 6.63E-06 | 6.081475 | 14  | 1.04E+08 | TSS1500                                                     | -1233    | TDRD9          | TDRD9        |
| cg04115136 | 3.31E-08 | 6.63E-06 | 6.081395 | 1   | 32232407 | TSS000;TSS000;TSS000                                        | -2466    | ADGRB2         | ADGRB2       |
| cg15821214 | 3.32E-08 | 6.63E-06 | 6.081096 | 2   | 95939815 | TSS1500;TSS1500;TSS1500;TSS1500                             | -381     | PROM2          | PROM2        |
| cg20250908 | 3.32E-08 | 6.63E-06 | 6.081049 | 11  | 65032183 | Body                                                        | 2751     | POLA2          | POLA2        |





| Probe      | p_adj    | q_val    | t        | Chr | Pos.hg19 | locations                                                            | dist2TSS | gene.Illumina                                                                                          | gene.nearest |
|------------|----------|----------|----------|-----|----------|----------------------------------------------------------------------|----------|--------------------------------------------------------------------------------------------------------|--------------|
| cg07723431 | 3.74E-08 | 7.10E-06 | 6.053311 | 19  | 2044540  | Body;Body                                                            | 6703     | MKNK2                                                                                                  | MKNK2        |
| cg27209679 | 3.74E-08 | 7.10E-06 | 6.053242 | 6   | 1.43E+08 | Body                                                                 | 46257    | HIVEP2                                                                                                 | HIVEP2       |
| cg17247026 | 3.76E-08 | 7.11E-06 | 6.052601 | 10  | 1.35E+08 | TSS5000;TSS5000                                                      | -3537    | CALY                                                                                                   | CALY         |
| cg00636737 | 3.76E-08 | 7.11E-06 | 6.052597 | 20  | 62695569 | Body;Body                                                            | 1019     | TCEA2                                                                                                  | TCEA2        |
| cg22855393 | 3.76E-08 | 7.11E-06 | 6.052354 | 8   | 74361427 | Body;Body;Body;Body                                                  | 29119    | STAU2                                                                                                  | STAU2-AS1    |
| cg12385643 | 3.76E-08 | 7.11E-06 | 6.05235  | 2   | 2.35E+08 | Body;Body;Body;Body;TSS200;TSS1500                                   | -166     | UGT1A8;UGT1A10;UGT1A9;UGT1A7;UGT1A6                                                                    | UGT1A6       |
| cg22600610 | 3.76E-08 | 7.11E-06 | 6.052344 | 1   | 21300625 | Body;Body;Body;Body                                                  | 14300    | EIF4G3                                                                                                 | MIR1256      |
| cg11988128 | 3.76E-08 | 7.11E-06 | 6.052245 | 17  | 76449562 | Body                                                                 | -31429   | DNAH17                                                                                                 | DNAH17-AS1   |
| cg10334509 | 3.76E-08 | 7.11E-06 | 6.052238 | 1   | 44573252 | Body                                                                 | -11240   | KLF17                                                                                                  | KLF17        |
| cg05864627 | 3.76E-08 | 7.11E-06 | 6.052216 | 15  | 25323793 | Body;TSS5000;TSS5000;TSS5000;TSS1500;TSS1500;TSS5000;TSS5000;TSS5000 | -410     | SNHG14;SNORD116-10;SNORD116-11;SNORD116-12;SNORD116-13;SNORD116-14;SNORD116-15;SNORD116-16;SNORD116-17 | SNORD116-13  |
| cg19088141 | 3.76E-08 | 7.11E-06 | 6.052067 | 1   | 1.13E+08 | Body;Body;Body                                                       | 4565     | WNT2B                                                                                                  | WNT2B        |
| cg22354363 | 3.77E-08 | 7.12E-06 | 6.051742 | 11  | 69514015 | 3'UTR                                                                | 4775     | FGF19                                                                                                  | FGF19        |
| cg08298584 | 3.77E-08 | 7.12E-06 | 6.051549 | 16  | 989477   | Body;Body;Body;Body;Body;Body;TSS5000;TSS5000                        | 18445    | LMF1;LMF1-AS1                                                                                          | LMF1-AS1     |
| cg16279544 | 3.78E-08 | 7.13E-06 | 6.051223 | 10  | 1.21E+08 | Body                                                                 | -12694   | BAG3                                                                                                   | BAG3         |
| cg02385411 | 3.78E-08 | 7.13E-06 | 6.0512   | 17  | 7674264  | Body                                                                 | 16627    | DNAH2                                                                                                  | RPL29P2      |
| cg02589568 | 3.78E-08 | 7.13E-06 | 6.051087 | 5   | 1.29E+08 | Body                                                                 | 132943   | CHSY3                                                                                                  | CHSY3        |
| cg07949217 | 3.79E-08 | 7.14E-06 | 6.050591 | 9   | 1.24E+08 | Body                                                                 | -7082    | DAB2IP                                                                                                 | DAB2IP       |
| cg08066306 | 3.80E-08 | 7.15E-06 | 6.050081 | 3   | 1.08E+08 | Body                                                                 | 40307    | LINC00636                                                                                              | LINC00636    |
| cg20303331 | 3.80E-08 | 7.15E-06 | 6.050007 | 17  | 36945575 | Body                                                                 | 10583    | PIP4K2B                                                                                                | PIP4K2B      |
| cg11080731 | 3.80E-08 | 7.15E-06 | 6.049944 | 12  | 94939916 | Body                                                                 | -15648   | MIR5700                                                                                                | MIR5700      |
| cg20152300 | 3.80E-08 | 7.16E-06 | 6.049604 | 6   | 32015389 | Body;Body;TSS1500                                                    | -1484    | TNXB                                                                                                   | TNXB         |
| cg10740594 | 3.81E-08 | 7.16E-06 | 6.049328 | 10  | 1.03E+08 | Body                                                                 | -28693   | SLF2                                                                                                   | SLF2         |
| cg18274791 | 3.81E-08 | 7.16E-06 | 6.049213 | 5   | 484843   | Body;Body;TSS5000                                                    | 11493    | SLC9A3;SLC9A3-AS1                                                                                      | SLC9A3-AS1   |
| cg13992493 | 3.81E-08 | 7.16E-06 | 6.049121 | 6   | 1.69E+08 | Body                                                                 | 250470   | SMOC2                                                                                                  | SMOC2        |
| cg13927401 | 3.81E-08 | 7.16E-06 | 6.049054 | 7   | 99918120 | Body;TSS5000                                                         | 12796    | SPDYE3;PMS2P1                                                                                          | SPDYE3       |
| cg17826043 | 3.82E-08 | 7.17E-06 | 6.048582 | 19  | 42299635 | TSS1500;TSS1500;TSS1500                                              | -883     | CEACAM3                                                                                                | CEACAM3      |
| cg21120413 | 3.82E-08 | 7.17E-06 | 6.048541 | 5   | 1.78E+08 | Body                                                                 | 71274    | COL23A1                                                                                                | COL23A1      |
| cg18817444 | 3.82E-08 | 7.17E-06 | 6.048539 | 17  | 39306458 | TSS1500                                                              | -381     | KRTAP4-5                                                                                               | KRTAP4-5     |
| cg11283729 | 3.83E-08 | 7.18E-06 | 6.048048 | 6   | 1.08E+08 | Body                                                                 | 116252   | SOBP                                                                                                   | SOBP         |
| cg10951736 | 3.83E-08 | 7.18E-06 | 6.048024 | 1   | 1.67E+08 | Body                                                                 | 32436    | DUSP27                                                                                                 | DUSP27       |
| cg26835568 | 3.83E-08 | 7.18E-06 | 6.047953 | 6   | 1.64E+08 | Body;Body;Body;TSS1500                                               | -667     | PACRG;PACRG-AS3                                                                                        | PACRG-AS3    |
| cg13298209 | 3.85E-08 | 7.20E-06 | 6.047082 | 7   | 6568476  | Body                                                                 | 22591    | GRID2IP                                                                                                | GRID2IP      |
| cg06249421 | 3.85E-08 | 7.20E-06 | 6.04701  | 17  | 46567806 | Body                                                                 | 40567    | HOXB1                                                                                                  | HOXB1        |
| cg02394247 | 3.85E-08 | 7.20E-06 | 6.046962 | 1   | 2836643  | Body                                                                 | -101387  | ACTRT2                                                                                                 | ACTRT2       |
| cg05194636 | 3.85E-08 | 7.21E-06 | 6.046686 | 11  | 12098045 | Body                                                                 | -34077   | MICAL2                                                                                                 | MICAL2       |
| cg26369180 | 3.86E-08 | 7.21E-06 | 6.04647  | 1   | 1246414  | TSS5000;Body;Body;Body;TSS5000;TSS5000;TSS5000;TSS5000;TSS5000       | 1532     | ACAP3;PUSL1;INTS11;MIR6727                                                                             | MIR6727      |
| cg24475275 | 3.86E-08 | 7.21E-06 | 6.046386 | 6   | 30644278 | TSS5000;TSS5000;TSS5000;3'UTR;3'UTR                                  | -3448    | DHX16;PPP1R18                                                                                          | DHX16        |
| cg01315407 | 3.86E-08 | 7.21E-06 | 6.046109 | 4   | 1.22E+08 | TSS1500;Body;Body                                                    | -701     | TNIP3                                                                                                  | TNIP3        |
| cg14394265 | 3.86E-08 | 7.21E-06 | 6.046108 | 4   | 1.88E+08 | Body                                                                 | 7139     | FAT1                                                                                                   | FAT1         |
| cg07804260 | 3.87E-08 | 7.22E-06 | 6.045679 | 11  | 2397977  | Body;Body;TSS1500                                                    | -569     | CD81-AS1;CD81                                                                                          | CD81         |
| cg07311566 | 3.87E-08 | 7.22E-06 | 6.045559 | 3   | 58632000 | Body                                                                 | -18663   | FAM3D                                                                                                  | FAM107A      |
| cg17786902 | 3.87E-08 | 7.22E-06 | 6.045421 | 1   | 19740722 | Body;Body;Body;Body;Body                                             | 70067    | CAPZB                                                                                                  | CAPZB        |
| cg25052223 | 3.87E-08 | 7.22E-06 | 6.045366 | 10  | 16993958 | Body                                                                 | -134505  | CUBN                                                                                                   | RSU1         |
| cg13443800 | 3.91E-08 | 7.28E-06 | 6.043348 | 9   | 1.3E+08  | Body                                                                 | -5180    | STXBP1                                                                                                 | STXBP1       |
| cg22040874 | 3.91E-08 | 7.28E-06 | 6.04329  | 1   | 4230824  | Body                                                                 | -221784  | LINC01345                                                                                              | LINC01345    |
| cg04490024 | 3.92E-08 | 7.29E-06 | 6.042925 | 8   | 1.44E+08 | TSS5000                                                              | 4724     | LY6L                                                                                                   | LY6L         |
| cg24202922 | 3.92E-08 | 7.29E-06 | 6.04291  | 11  | 77296743 | TSS5000;TSS5000                                                      | -3936    | AQP11                                                                                                  | AQP11        |
| cg16270633 | 3.92E-08 | 7.29E-06 | 6.042775 | 15  | 91256830 | Body;TSS5000;TSS5000;TSS5000;TSS5000                                 | 3541     | CRTC3-AS1;BLM                                                                                          | CRTC3-AS1    |
| cg16999495 | 3.92E-08 | 7.29E-06 | 6.042541 | 10  | 85995762 | Body                                                                 | 5540     | LRR11                                                                                                  | LRR11        |
| cg13968679 | 3.93E-08 | 7.30E-06 | 6.042381 | 10  | 1.05E+08 | Body;TSS5000                                                         | 3621     | CALHM3;NEURL1-AS1                                                                                      | CALHM3       |
| cg04770020 | 3.93E-08 | 7.30E-06 | 6.042168 | 2   | 1544321  | Body;Body;Body;Body;Body;Body                                        | 126142   | TPO                                                                                                    | TPO          |
| cg25737411 | 3.94E-08 | 7.31E-06 | 6.041715 | 17  | 7286288  | 1stExon;1stExon                                                      | 1881     | TNK1                                                                                                   | TNK1         |
| cg05482956 | 3.95E-08 | 7.32E-06 | 6.041192 | 11  | 16635016 | Body                                                                 | 125008   | SOX6                                                                                                   | SOX6         |
| cg09319797 | 3.95E-08 | 7.33E-06 | 6.040828 | 16  | 12061715 | TSS5000;3'UTR                                                        | 2649     | NPIPB2;TNFRSF17                                                                                        | TNFRSF17     |
| cg03962200 | 3.95E-08 | 7.33E-06 | 6.040662 | 22  | 31518707 | TSS1500;TSS1500;TSS1500;TSS1500;TSS1500;TSS1500                      | -201     | INPP5J                                                                                                 | INPP5J       |
| cg13930220 | 3.95E-08 | 7.33E-06 | 6.040633 | 13  | 1.07E+08 | Body                                                                 | 48098    | LINC00443                                                                                              | LINC00443    |

| Probe      | p_adj    | q_val    | t        | Chr | Pos.hg19 | locations                                                    | dist2TSS | gene.Illumina     | gene.nearest |
|------------|----------|----------|----------|-----|----------|--------------------------------------------------------------|----------|-------------------|--------------|
| cg15518542 | 3.96E-08 | 7.34E-06 | 6.040468 | 10  | 1444784  | Body                                                         | -124040  | ADARB2            | ADARB2-AS1   |
| cg14321708 | 3.98E-08 | 7.37E-06 | 6.039325 | 9   | 1.37E+08 | Body;Body                                                    | 9819     | WDR5              | RNU6ATAC     |
| cg18485070 | 3.98E-08 | 7.37E-06 | 6.039225 | 2   | 1.32E+08 | TSS1500                                                      | -1278    | NOC2LP2           | NOC2LP2      |
| cg10945695 | 3.98E-08 | 7.37E-06 | 6.03922  | 5   | 32871131 |                                                              | -76417   |                   | LINC02120    |
| cg17434901 | 3.98E-08 | 7.37E-06 | 6.038978 | 11  | 1.34E+08 | TSS5000                                                      | 11702    | LINC02731         | LINC02731    |
| cg25003658 | 3.99E-08 | 7.38E-06 | 6.03851  | 5   | 1.18E+08 | Body;Body                                                    | -21759   | DTWD2             | MIR1244-2    |
| cg17077641 | 3.99E-08 | 7.38E-06 | 6.038507 | 17  | 13499920 | Body                                                         | 5326     | HS3ST3A1          | HS3ST3A1     |
| cg04784014 | 4.00E-08 | 7.38E-06 | 6.038276 | 7   | 5521290  | Body;3'UTR;3'UTR;3'UTR                                       | 14258    | FBXL18            | MIR589       |
| cg08649439 | 4.00E-08 | 7.38E-06 | 6.038248 | 7   | 4761868  | Body                                                         | 39943    | FOXK1             | FOXK1        |
| cg06025671 | 4.00E-08 | 7.39E-06 | 6.037904 | 8   | 1.42E+08 |                                                              | -26191   |                   | DENND3       |
| cg13424284 | 4.00E-08 | 7.39E-06 | 6.037865 | 1   | 26624129 | Body;Body;Body                                               | 9066     | UBXN11            | UBXN11       |
| cg19979750 | 4.01E-08 | 7.39E-06 | 6.037712 | 12  | 1.23E+08 | Body                                                         | 27991    | VPS37B            | VPS37B       |
| cg26520908 | 4.01E-08 | 7.39E-06 | 6.037553 | 1   | 3191876  | Body;Body                                                    | 147338   | PRDM16            | MIR4251      |
| cg11579646 | 4.01E-08 | 7.39E-06 | 6.037425 | 6   | 1.7E+08  |                                                              | -85629   |                   | LOC102724511 |
| cg02500075 | 4.01E-08 | 7.39E-06 | 6.037385 | 3   | 1.79E+08 |                                                              | -17464   |                   | ACTL6A       |
| cg20748397 | 4.02E-08 | 7.40E-06 | 6.036933 | 17  | 18062972 | Body                                                         | -24169   | MYO15A            | ALKBH5       |
| cg07283859 | 4.02E-08 | 7.41E-06 | 6.036612 | 5   | 14160853 | Body;Body                                                    | 17403    | TRIO              | TRIO         |
| cg06817802 | 4.03E-08 | 7.42E-06 | 6.036161 | 5   | 1291319  | Body;Body;Body;Body                                          | 3864     | TERT              | TERT         |
| cg07450393 | 4.03E-08 | 7.42E-06 | 6.036118 | 17  | 78898262 | Body;Body                                                    | 46751    | RPTOR             | LOC400627    |
| cg06373817 | 4.04E-08 | 7.43E-06 | 6.035593 | 15  | 93123126 |                                                              | -7633    |                   | LINC00930    |
| cg03816507 | 4.04E-08 | 7.43E-06 | 6.035565 | 4   | 1217392  | Body;Body                                                    | 13485    | CTBP1             | CTBP1-AS     |
| cg09301143 | 4.05E-08 | 7.44E-06 | 6.035081 | 2   | 95955715 | Body;Body;3'UTR;Body                                         | -7379    | PROM2             | KCNIP3       |
| cg12367543 | 4.06E-08 | 7.45E-06 | 6.034849 | 22  | 48602194 |                                                              | -67981   |                   | MIR3201      |
| cg17559785 | 4.06E-08 | 7.45E-06 | 6.03479  | 12  | 1.08E+08 | Body;Body;Body;Body                                          | 31945    | BTBD11            | BTBD11       |
| cg01395690 | 4.07E-08 | 7.48E-06 | 6.033803 | 19  | 50478330 | 3'UTR;Body;TSS5000;TSS5000                                   | 5410     | SIGLEC16;VRK3     | SIGLEC16     |
| cg18877200 | 4.08E-08 | 7.48E-06 | 6.033652 | 6   | 29720927 | TSS5000;TSS5000;TSS5000                                      | -2002    | HLA-F-AS1;IFITM4P | IFITM4P      |
| cg22111818 | 4.08E-08 | 7.48E-06 | 6.033393 | 15  | 93588137 | 3'UTR;3'UTR;3'UTR;3'UTR;3'UTR;3'UTR                          | 28248    | RGMA              | RGMA         |
| cg01252713 | 4.08E-08 | 7.48E-06 | 6.033381 | 2   | 2.36E+08 |                                                              | -41722   |                   | LINC01173    |
| cg01952788 | 4.09E-08 | 7.49E-06 | 6.033099 | 15  | 40663180 | 3'UTR                                                        | -11741   | DISP2             | KNSTRN       |
| cg05621516 | 4.09E-08 | 7.49E-06 | 6.032954 | 6   | 99728990 | 3'UTR;3'UTR;Body;3'UTR;3'UTR;3'UTR;Body                      | 68560    | FAXC              | FAXC         |
| cg14776050 | 4.10E-08 | 7.50E-06 | 6.032326 | 11  | 74978433 | Body;Body                                                    | 26615    | ARRB1             | TPBGL        |
| cg25663741 | 4.10E-08 | 7.50E-06 | 6.032087 | 15  | 49686764 | Body                                                         | -28674   | FAM227B           | FGF7         |
| cg10059178 | 4.10E-08 | 7.50E-06 | 6.032073 | 8   | 1.45E+08 | 1stExon                                                      | 8961     | EPPK1             | EPPK1        |
| cg06848073 | 4.10E-08 | 7.50E-06 | 6.032067 | 1   | 11713540 | Body;TSS1500;TSS1500;TSS1500;TSS1500;TSS1500;TSS1500;TSS1500 | -923     | FBXO2;FBXO44      | FBXO44       |
| cg17023911 | 4.11E-08 | 7.51E-06 | 6.031676 | 22  | 49786029 |                                                              | 151085   |                   | MIR3667      |
| cg10962490 | 4.12E-08 | 7.51E-06 | 6.031405 | 1   | 54072456 | Body;Body                                                    | 127421   | GLIS1             | GLIS1        |
| cg04324276 | 4.12E-08 | 7.51E-06 | 6.031392 | 17  | 17817462 | Body;Body;Body;Body;Body;Body;Body;Body                      | 58252    | TOM1L2            | TOM1L2       |
| cg25193782 | 4.12E-08 | 7.51E-06 | 6.031348 | 17  | 47976494 |                                                              | -51115   |                   | TAC4         |
| cg09694272 | 4.12E-08 | 7.51E-06 | 6.031293 | 13  | 1E+08    | TSS5000;TSS5000                                              | -4034    | CLYBL             | CLYBL        |
| cg13759446 | 4.13E-08 | 7.53E-06 | 6.030809 | 11  | 1.03E+08 | Body;Body;Body                                               | 1013     | WTAPP1;MMP1       | MMP1         |
| cg00359365 | 4.13E-08 | 7.53E-06 | 6.030637 | 1   | 26880547 | Body;Body;Body;TSS1500                                       | -485     | RPS6KA1;MIR1976   | MIR1976      |
| cg22584718 | 4.13E-08 | 7.53E-06 | 6.030358 | 12  | 97512826 |                                                              | 211583   |                   | NEDD1        |
| cg02948259 | 4.14E-08 | 7.53E-06 | 6.030308 | 22  | 24988020 | Body;Body                                                    | 1020     | GGT1;LRRC75B      | LRRC75B      |
| cg22442352 | 4.14E-08 | 7.54E-06 | 6.029923 | 5   | 1.49E+08 | 3'UTR;3'UTR;3'UTR                                            | 75859    | PPARGC1B          | PPARGC1B     |
| cg08095452 | 4.14E-08 | 7.54E-06 | 6.029845 | 17  | 55958800 | Body;Body                                                    | 21950    | CUEDC1            | CUEDC1       |
| cg27189723 | 4.15E-08 | 7.55E-06 | 6.029396 | 7   | 1.34E+08 | Body;Body;Body                                               | 6207     | AKR1B1            | AKR1B1       |
| cg16330786 | 4.16E-08 | 7.56E-06 | 6.029121 | 2   | 75326898 | Body;Body                                                    | 8960     | TACR1             | MIR5000      |
| cg05687719 | 4.17E-08 | 7.57E-06 | 6.028632 | 16  | 86265226 | Body                                                         | 35440    | LINC01081         | LINC01082    |
| cg07122009 | 4.17E-08 | 7.57E-06 | 6.028438 | 16  | 1611802  | Body                                                         | -18725   | IFT140            | LOC105371046 |
| cg25798827 | 4.17E-08 | 7.57E-06 | 6.028415 | 6   | 89788126 | TSS5000                                                      | -2343    | PNRC1             | PNRC1        |
| cg02531548 | 4.17E-08 | 7.58E-06 | 6.02823  | 2   | 8234915  | Body                                                         | -117970  | LINC00299         | LINC00298    |
| cg23588952 | 4.19E-08 | 7.60E-06 | 6.027154 | 8   | 2024300  | Body;TSS1500                                                 | -368     | MYOM2;MIR7160     | MIR7160      |
| cg12804910 | 4.19E-08 | 7.60E-06 | 6.027127 | 12  | 1.33E+08 | Body;TSS5000                                                 | 4784     | DDX51;NOC4L       | DDX51        |
| cg23480479 | 4.19E-08 | 7.60E-06 | 6.027111 | 5   | 38665490 | Body                                                         | 54885    | LIFR-AS1          | LINC01265    |
| cg12115087 | 4.20E-08 | 7.60E-06 | 6.026897 | 7   | 1.33E+08 | Body                                                         | 243992   | EXOC4             | MIR6133      |
| cg03499581 | 4.20E-08 | 7.60E-06 | 6.026869 | 15  | 78384868 | TSS200                                                       | -58      | SH2D7             | SH2D7        |
| cg24159142 | 4.20E-08 | 7.60E-06 | 6.026825 | 20  | 50310568 | Body                                                         | 74361    | ATP9A             | ATP9A        |
| cg02392813 | 4.20E-08 | 7.60E-06 | 6.026792 | 5   | 80594700 | Body;Body;Body;TSS5000;TSS5000;TSS5000                       | 2688     | CKMT2-AS1;ZCCHC9  | CKMT2-AS1    |
| cg00329447 | 4.20E-08 | 7.60E-06 | 6.026697 | 8   | 1.45E+08 | TSS5000;TSS200;Body;Body                                     | -168     | PLEC              | PLEC         |
| cg14210790 | 4.20E-08 | 7.60E-06 | 6.026567 | 15  | 70877277 | Body                                                         | 1668     | LINC02204         | LINC02204    |

| Probe      | p_adj    | q_val    | t        | Chr | Pos.hg19 | locations                                                                                      | dist2TSS | gene.Illumina       | gene.nearest |
|------------|----------|----------|----------|-----|----------|------------------------------------------------------------------------------------------------|----------|---------------------|--------------|
| cg07973507 | 4.21E-08 | 7.60E-06 | 6.026414 | 14  | 1.06E+08 |                                                                                                | 8071     |                     | MIR8071-1    |
| cg03525254 | 4.21E-08 | 7.60E-06 | 6.026382 | 1   | 1.1E+08  | Body;Body;Body;Body;TSS5000;TSS5000;TSS5000;TSS5000                                            | -3746    | ATXN7L2;CYB561D1    | CYB561D1     |
| cg01963976 | 4.21E-08 | 7.60E-06 | 6.02629  | 14  | 21498561 | TSS5000;TSS5000;TSS5000;TSS5000;Body;TSS5000;TSS5000;TSS5000;TSS5000;TSS5000;Body;TSS5000      | 186      | NDRG2;TPPP2;RNASE13 | TPPP2        |
| cg14412490 | 4.22E-08 | 7.63E-06 | 6.025538 | 11  | 77880406 | Body;Body;TSS5000                                                                              | 19266    | KCTD21-AS1;KCTD21   | KCTD21       |
| cg05824174 | 4.22E-08 | 7.63E-06 | 6.025431 | 12  | 3142845  | Body;Body;Body                                                                                 | -43675   | TEAD4               | TSPAN9       |
| cg15687653 | 4.24E-08 | 7.64E-06 | 6.024819 | 1   | 6271667  | Body                                                                                           | 5489     | RNF207              | RNF207       |
| cg09759523 | 4.24E-08 | 7.66E-06 | 6.024323 | 10  | 7621857  | Body;Body;Body                                                                                 | 39779    | ITIH5               | ITIH5        |
| cg19566879 | 4.25E-08 | 7.66E-06 | 6.024267 | 6   | 16334128 | Body;Body;Body                                                                                 | 95311    | ATXN1               | GMPR         |
| cg27047255 | 4.25E-08 | 7.66E-06 | 6.023929 | 1   | 2.04E+08 | Body                                                                                           | 34303    | PIK3C2B             | PIK3C2B      |
| cg16306644 | 4.25E-08 | 7.66E-06 | 6.023926 | 7   | 1006943  | 3'UTR                                                                                          | 8242     | COX19               | COX19        |
| cg00709423 | 4.25E-08 | 7.66E-06 | 6.023919 | 7   | 1.51E+08 | Body;Body;Body;Body;Body;Body;Body                                                             | 5110     | AGAP3               | AGAP3        |
| cg21153004 | 4.25E-08 | 7.66E-06 | 6.023817 | 15  | 65207109 | Body                                                                                           | 3009     | ANKDD1A             | ANKDD1A      |
| cg13713066 | 4.26E-08 | 7.67E-06 | 6.023295 | 7   | 1.29E+08 | TSS1500;TSS5000;TSS5000                                                                        | -325     | MIR182;MIR96;MIR183 | MIR182       |
| cg10758165 | 4.26E-08 | 7.67E-06 | 6.02329  | 15  | 65392263 | Body                                                                                           | 6434     | UBAP1L              | UBAP1L       |
| cg07317047 | 4.27E-08 | 7.67E-06 | 6.023055 | 3   | 69994982 | Body;Body;Body;Body;Body;Body;Body;Body;Body;Body;Body                                         | 9232     | MITF                | MITF         |
| cg24734792 | 4.27E-08 | 7.67E-06 | 6.022944 | 10  | 64580360 | TSS5000;TSS5000;TSS5000;TSS5000;TSS1500                                                        | -1433    | EGR2                | EGR2         |
| cg24612498 | 4.27E-08 | 7.67E-06 | 6.022911 | 3   | 8572798  | Body;Body;Body;Body                                                                            | 29290    | LMCD1               | LMCD1        |
| cg07397503 | 4.27E-08 | 7.67E-06 | 6.022873 | 13  | 23471764 | Body;Body                                                                                      | 556      | LINC00621;BASP1P1   | BASP1P1      |
| cg07185068 | 4.28E-08 | 7.69E-06 | 6.022174 | 3   | 53801915 | Body;Body;Body                                                                                 | 78531    | CACNA1D             | CHDH         |
| cg05885676 | 4.31E-08 | 7.73E-06 | 6.020965 | 14  | 93104601 | Body;Body                                                                                      | 62023    | RIN3                | RIN3         |
| cg08573869 | 4.31E-08 | 7.74E-06 | 6.020507 | 8   | 1.45E+08 | Body;Body;Body;TSS5000;TSS5000;TSS5000;TSS5000;TSS5000;TSS5000;TSS5000;TSS5000;TSS5000;TSS5000 | 44       | SCRIB;MIR937;PUF60  | MIR937       |
| cg09883947 | 4.32E-08 | 7.74E-06 | 6.020357 | 3   | 33477985 | Body;Body;Body                                                                                 | 3885     | UBP1                | UBP1         |
| cg13741304 | 4.32E-08 | 7.74E-06 | 6.020224 | 9   | 1.41E+08 | Body;Body                                                                                      | 1168     | ARRDC1              | ARRDC1       |
| cg03835755 | 4.32E-08 | 7.74E-06 | 6.020042 | 2   | 1.92E+08 | Body;Body;Body;TSS5000;TSS5000                                                                 | -4284    | NAB1                | NAB1         |
| cg18912541 | 4.32E-08 | 7.74E-06 | 6.020019 | 14  | 69596496 | Body;Body;Body;Body                                                                            | 22820    | DCAF5               | DCAF5        |
| cg25837277 | 4.33E-08 | 7.74E-06 | 6.019954 | 19  | 46999366 | Body;TSS1500                                                                                   | -242     | PPP5D1;PNMA8B       | PNMA8B       |
| cg04142643 | 4.33E-08 | 7.75E-06 | 6.019611 | 17  | 75478263 | Body;Body;Body;Body;Body;Body;Body;1stExon;1stExon;1stExon;Body                                | 6939     | SEPTIN9             | SEPTIN9      |
| cg0908050  | 4.34E-08 | 7.76E-06 | 6.019311 | 11  | 8090206  | Body;Body;Body                                                                                 | 8622     | TUB;TUB-AS1         | TUB-AS1      |
| cg14228177 | 4.35E-08 | 7.78E-06 | 6.018475 | 7   | 1606526  | TSS5000;TSS5000;TSS5000;TSS5000;TSS5000                                                        | 3142     | PSMG3;PSMG3-AS1     | PSMG3        |
| cg27329908 | 4.36E-08 | 7.79E-06 | 6.018289 | 3   | 38671866 | Body;Body;Body;Body;Body;Body;Body                                                             | 19297    | SCN5A               | SCN5A        |
| cg03078819 | 4.37E-08 | 7.80E-06 | 6.017764 | 7   | 1.4E+08  | 3'UTR;3'UTR;Body;3'UTR                                                                         | -38969   | DENND2A             | MKRN1        |
| cg08272591 | 4.37E-08 | 7.80E-06 | 6.017719 | 8   | 28576644 | Body;Body;Body                                                                                 | 17627    | EXTL3               | EXTL3        |
| cg02083492 | 4.38E-08 | 7.82E-06 | 6.017102 | 7   | 98031846 | TSS1500                                                                                        | -1444    | BAIAP2L1            | BAIAP2L1     |
| cg06340836 | 4.39E-08 | 7.83E-06 | 6.016651 | 16  | 88765676 | Body;Body;Body                                                                                 | 4313     | RNF166              | RNF166       |
| cg07172339 | 4.39E-08 | 7.83E-06 | 6.016507 | 1   | 1.79E+08 | Body;Body;Body;Body;Body;Body;Body                                                             | 27546    | ABL2                | ABL2         |
| cg00264994 | 4.40E-08 | 7.84E-06 | 6.016165 | 17  | 47991806 |                                                                                                | -54747   | DLX4                | DLX4         |
| cg20569070 | 4.40E-08 | 7.84E-06 | 6.015999 | 2   | 2.33E+08 | 3'UTR;3'UTR                                                                                    | 19256    | PDE6D               | MIR1244-1    |
| cg14517133 | 4.40E-08 | 7.84E-06 | 6.01597  | 6   | 42664420 | TSS5000;TSS5000;3'UTR                                                                          | 25915    | UBR2;PRPH2          | PRPH2        |
| cg02055353 | 4.40E-08 | 7.84E-06 | 6.015938 | 11  | 1.26E+08 | TSS5000;TSS5000;TSS5000;TSS5000;TSS5000;TSS5000;TSS5000;TSS5000;TSS5000                        | 11042    | ST3GAL4             | ST3GAL4      |
| cg18447587 | 4.40E-08 | 7.84E-06 | 6.015785 | 2   | 64627858 |                                                                                                | -53437   |                     | LGALS1       |
| cg24265719 | 4.41E-08 | 7.84E-06 | 6.015693 | 8   | 1651101  | 3'UTR                                                                                          | 60399    | DLGAP2              | LOC101927752 |
| cg15864104 | 4.41E-08 | 7.84E-06 | 6.015482 | 18  | 55254508 | TSS1500;TSS1500;TSS1500;TSS1500                                                                | -574     | FECH                | FECH         |
| cg20396782 | 4.41E-08 | 7.84E-06 | 6.015426 | 17  | 27330221 | Body;Body;Body                                                                                 | 2830     | SEZ6                | SEZ6         |
| cg05056653 | 4.41E-08 | 7.84E-06 | 6.015377 | 17  | 81023856 |                                                                                                | -13628   |                     | METRN1       |
| cg20522761 | 4.42E-08 | 7.86E-06 | 6.014744 | 8   | 1.44E+08 | Body                                                                                           | 13240    | ADGRB1              | ADGRB1       |
| cg09168501 | 4.43E-08 | 7.86E-06 | 6.014575 | 1   | 1.7E+08  | TSS1500                                                                                        | -944     | METTL11B            | METTL11B     |
| cg01041717 | 4.43E-08 | 7.87E-06 | 6.0143   | 13  | 1.07E+08 |                                                                                                | -19849   |                     | LINC00460    |
| cg10497481 | 4.43E-08 | 7.87E-06 | 6.014262 | 7   | 36008153 |                                                                                                | -126766  |                     | LOC101928618 |
| cg00348891 | 4.43E-08 | 7.87E-06 | 6.014217 | 13  | 46251914 | TSS5000                                                                                        | 23405    | LINC01055           | LINC01055    |
| cg05689208 | 4.44E-08 | 7.87E-06 | 6.014062 | 8   | 49496391 | Body                                                                                           | 32265    | LOC101929268        | LOC101929268 |
| cg10265952 | 4.44E-08 | 7.87E-06 | 6.013923 | 6   | 5043901  | TSS5000;TSS5000;Body;TSS5000;TSS5000                                                           | 13696    | LYRM4-AS1           | LYRM4-AS1    |
| cg13634653 | 4.44E-08 | 7.87E-06 | 6.013828 | 15  | 78552612 | TSS5000;TSS5000                                                                                | -3874    | DNAJA4              | DNAJA4       |
| cg02683408 | 4.44E-08 | 7.87E-06 | 6.01367  | 17  | 79487159 |                                                                                                | -7334    |                     | ACTG1        |
| cg03830401 | 4.45E-08 | 7.87E-06 | 6.013531 | 10  | 70812585 |                                                                                                | -34773   |                     | SRGN         |
| cg27542224 | 4.46E-08 | 7.89E-06 | 6.012837 | 6   | 1.7E+08  | Body;Body;Body;Body                                                                            | 211768   | WDR27               | WDR27        |
| cg13803632 | 4.46E-08 | 7.90E-06 | 6.012647 | 1   | 81968855 | Body;Body;Body                                                                                 | 54532    | ADGRL2              | LOC101927434 |
| cg25483191 | 4.47E-08 | 7.90E-06 | 6.012446 | 8   | 67050040 | Body;Body;Body;Body                                                                            | 10677    | TRIM55              | TRIM55       |
| cg21924070 | 4.47E-08 | 7.90E-06 | 6.012345 | 3   | 1.41E+08 | Body                                                                                           | 18265    | SPSB4               | SPSB4        |
| cg24960118 | 4.47E-08 | 7.90E-06 | 6.012315 | 6   | 51815507 | Body;Body                                                                                      | 136904   | PKHD1               | PKHD1        |

| Probe      | p_adj    | q_val    | t        | Chr | Pos.hg19 | locations                                                                       | dist2TSS | gene.Illumina             | gene.nearest |
|------------|----------|----------|----------|-----|----------|---------------------------------------------------------------------------------|----------|---------------------------|--------------|
| cg09607229 | 4.47E-08 | 7.90E-06 | 6.012228 | 3   | 44619924 | Body;Body;Body;Body                                                             | -6531    | ZKSCAN7;ZKSCAN7-AS1       | ZNF660       |
| cg08695416 | 4.47E-08 | 7.90E-06 | 6.012216 | 2   | 43309970 |                                                                                 | 19613    |                           | LINC02580    |
| cg07619672 | 4.48E-08 | 7.90E-06 | 6.012015 | 15  | 64338028 | Body;Body                                                                       | 656      | DAPK2                     | DAPK2        |
| cg19562108 | 4.49E-08 | 7.93E-06 | 6.01105  | 17  | 28420331 | Body                                                                            | -23493   | EFCAB5                    | NSRP1        |
| cg13052876 | 4.50E-08 | 7.94E-06 | 6.010728 | 20  | 35972924 | TSS200;TSS5000                                                                  | -163     | SRC                       | SRC          |
| cg05257528 | 4.50E-08 | 7.94E-06 | 6.010676 | 19  | 846179   | Body                                                                            | 5181     | PRTN3                     | PRTN3        |
| cg17876831 | 4.50E-08 | 7.94E-06 | 6.010539 | 17  | 18918410 | Body;Body;Body;Body;Body                                                        | -10333   | SLCSA10                   | FAM83G       |
| cg06956052 | 4.51E-08 | 7.94E-06 | 6.010399 | 1   | 1.6E+08  | TSS200                                                                          | -191     | ATP1A4                    | ATP1A4       |
| cg03900565 | 4.51E-08 | 7.94E-06 | 6.010021 | 1   | 2.03E+08 | Body;Body                                                                       | -21107   | PPFIA4                    | MYOPARR      |
| cg05642426 | 4.52E-08 | 7.94E-06 | 6.009987 | 8   | 22492984 | Body;Body;Body;TESS000                                                          | 6738     | BIN3;BIN3-IT1             | BIN3-IT1     |
| cg01502208 | 4.52E-08 | 7.94E-06 | 6.00994  | 2   | 54855588 | Body;Body                                                                       | 70058    | SPTBN1                    | SPTBN1       |
| cg25152348 | 4.52E-08 | 7.94E-06 | -6.00987 | 22  | 50946712 | TSS1500;TSS1500;5'UTR;5'UTR;5'UTR                                               | 60       | LMF2;NCAPH2               | NCAPH2       |
| cg22790973 | 4.52E-08 | 7.94E-06 | -6.00984 | 12  | 51566990 | TSS200;TSS200;TSS200                                                            | -72      | TFCP2                     | TFCP2        |
| cg07365452 | 4.53E-08 | 7.96E-06 | 6.009325 | 3   | 42265749 | 3'UTR;Body;3'UTR;3'UTR;3'UTR;3'UTR;3'UTR                                        | 39690    | TRAK1                     | CCK          |
| cg16772207 | 4.54E-08 | 7.98E-06 | 6.008697 | 20  | 62795807 | 5'UTR                                                                           | 3        | MYT1                      | MYT1         |
| cg01728830 | 4.55E-08 | 7.98E-06 | 6.008478 | 11  | 1.18E+08 | 5'UTR;Body;Body;Body;Body;Body;Body;Body                                        | 13       | SMIM35;TMPS4              | SMIM35       |
| cg00122854 | 4.55E-08 | 7.98E-06 | 6.008289 | 2   | 2.19E+08 | TSS1500                                                                         | -1165    | RUFY4                     | RUFY4        |
| cg05347158 | 4.55E-08 | 7.98E-06 | 6.008139 | 1   | 32148832 | Body                                                                            | 20786    | COL16A1                   | COL16A1      |
| cg12458932 | 4.55E-08 | 7.98E-06 | 6.008087 | 2   | 2.25E+08 |                                                                                 | -33833   | SERPINE2                  | SERPINE2     |
| cg00294940 | 4.55E-08 | 7.98E-06 | 6.008027 | 1   | 48687524 | TSS1500;TSS1500                                                                 | -863     | SLCSA9                    | SLCSA9       |
| cg13699245 | 4.55E-08 | 7.98E-06 | 6.008019 | 9   | 1.37E+08 |                                                                                 | -48266   |                           | COL5A1       |
| cg10809622 | 4.56E-08 | 7.98E-06 | 6.007873 | 6   | 1.68E+08 |                                                                                 | -13895   |                           | CCR6         |
| cg00384632 | 4.56E-08 | 7.98E-06 | 6.007799 | 7   | 2194791  | Body;Body;Body;Body;Body                                                        | -66104   | MAD1L1                    | SNORA114     |
| cg15261605 | 4.56E-08 | 7.99E-06 | 6.007635 | 10  | 73234421 | Body;Body;Body;Body;Body                                                        | 37256    | CDH23                     | CDH23-AS1    |
| cg01806238 | 4.57E-08 | 8.00E-06 | 6.007051 | 17  | 56597682 | TSS5000;Body;3'UTR;3'UTR;3'UTR;3'UTR;3'UTR;3'UTR;3'UTR;Body;Body;3'UTR          | 485      | MTMR4;SEPTIN4-AS1;SEPTIN4 | SEPTIN4-AS1  |
| cg22672830 | 4.58E-08 | 8.00E-06 | 6.006905 | 6   | 31829093 | Body;TESS000;TESS000;TESS000                                                    | 1505     | NEU1;SLC44A4              | NEU1         |
| cg17276118 | 4.58E-08 | 8.00E-06 | 6.006728 | 11  | 92083801 | Body;TSS1500                                                                    | -1460    | FAT3                      | FAT3         |
| cg05798126 | 4.58E-08 | 8.00E-06 | 6.006656 | 6   | 3089496  | Body;Body;Body;Body;Body;Body;Body                                              | 20769    | RIPK1                     | RIPK1        |
| cg02302670 | 4.58E-08 | 8.00E-06 | 6.006621 | 8   | 21904079 | Body;Body;TSS5000;TSS5000                                                       | -2362    | FGF17;DMTN                | DMTN         |
| cg09424896 | 4.59E-08 | 8.02E-06 | 6.006226 | 19  | 16284351 | TSS200;TSS200                                                                   | -15      | CIB3                      | CIB3         |
| cg17794788 | 4.60E-08 | 8.03E-06 | 6.00557  | 2   | 2.39E+08 | TSS1500;TSS1500                                                                 | -856     | RAMP1                     | RAMP1        |
| cg16156434 | 4.61E-08 | 8.04E-06 | 6.005344 | 10  | 1.34E+08 | Body                                                                            | -28394   | INPP5A                    | INPP5A       |
| cg13768360 | 4.62E-08 | 8.06E-06 | 6.004647 | 20  | 61312704 |                                                                                 | -14731   |                           | SLC04A1-AS1  |
| cg00978848 | 4.62E-08 | 8.06E-06 | 6.004527 | 2   | 2.36E+08 |                                                                                 | 88994    |                           | LINC01173    |
| cg26086527 | 4.63E-08 | 8.07E-06 | 6.004103 | 14  | 34272019 | 3'UTR;3'UTR;3'UTR;3'UTR                                                         | 93877    | NPAS3                     | SNORA89      |
| cg10060191 | 4.63E-08 | 8.07E-06 | 6.0041   | 16  | 66282209 |                                                                                 | -118384  |                           | CDH5         |
| cg16372825 | 4.64E-08 | 8.07E-06 | 6.003937 | 16  | 87823925 |                                                                                 | -11171   |                           | LOC102724467 |
| cg00959298 | 4.64E-08 | 8.07E-06 | 6.003867 | 17  | 71825500 | TSS1500                                                                         | -824     | LINC00469                 | LINC00469    |
| cg21730858 | 4.66E-08 | 8.10E-06 | 6.002842 | 6   | 1.39E+08 | Body;Body                                                                       | 14311    | NHSL1                     | NHSL1        |
| cg23925540 | 4.66E-08 | 8.11E-06 | 6.002637 | 12  | 50962271 | Body                                                                            | 63504    | DIP2B                     | DIP2B        |
| cg10100556 | 4.67E-08 | 8.11E-06 | 6.002441 | 16  | 89657887 | Body;Body                                                                       | 15722    | CPNE7                     | CPNE7        |
| cg03213396 | 4.67E-08 | 8.12E-06 | 6.00213  | 19  | 53760449 | TSS5000;TSS5000;TSS1500                                                         | -1095    | ZNF677;VN1R2              | VN1R2        |
| cg23545258 | 4.68E-08 | 8.13E-06 | 6.001807 | 14  | 50394636 |                                                                                 | 34837    |                           | ARF6         |
| cg14323608 | 4.68E-08 | 8.13E-06 | 6.001748 | 19  | 13873961 | 3'UTR;3'UTR;3'UTR;3'UTR;3'UTR;3'UTR;3'UTR;3'UTR;TSS1500;TSS1500;TSS1500;TSS1500 | -1374    | CCDC130;MRI1              | MRI1         |
| cg27573606 | 4.69E-08 | 8.14E-06 | 6.001083 | 1   | 838379   |                                                                                 | 16693    |                           | LINC02593    |
| cg13912358 | 4.69E-08 | 8.14E-06 | 6.001076 | 3   | 14505367 | Body;Body;Body                                                                  | 61262    | SLC6A6                    | SLC6A6       |
| cg06325565 | 4.70E-08 | 8.15E-06 | 6.000859 | 11  | 63889842 | Body;TESS000                                                                    | 18481    | MACROD1;FLRT1             | FLRT1        |
| cg01987202 | 4.70E-08 | 8.16E-06 | 6.000477 | 15  | 40633194 | TSS200                                                                          | -26      | CCDC9B                    | CCDC9B       |
| cg14355321 | 4.71E-08 | 8.16E-06 | 6.000385 | 8   | 1.24E+08 | Body;Body                                                                       | 83273    | ZHX2                      | DERL1        |
| cg01019188 | 4.71E-08 | 8.16E-06 | 6.000319 | 7   | 14809526 | Body;Body;Body;Body;Body;Body;Body;Body;Body;Body;Body;Body;Body;Body;Body;Body | 71549    | DGKB                      | DGKB         |
| cg19556337 | 4.71E-08 | 8.16E-06 | 6.000086 | 11  | 511660   | TSS5000;TSS5000;TSS5000;TSS5000;TSS5000;TSS5000;TSS5000;TSS5000                 | -4418    | RNH1                      | RNH1         |
| cg06995828 | 4.71E-08 | 8.16E-06 | 6.000005 | 2   | 84160861 |                                                                                 | -356944  |                           | FUND2P2      |
| cg19968179 | 4.72E-08 | 8.17E-06 | 5.99977  | 7   | 33847134 |                                                                                 | -97392   |                           | BMPER        |
| cg19039367 | 4.72E-08 | 8.17E-06 | 5.999654 | 6   | 30012436 | Body;Body                                                                       | 14073    | ZNRD1ASP                  | ZNRD1ASP     |
| cg18665513 | 4.72E-08 | 8.17E-06 | 5.99961  | 4   | 8087448  | Body;Body;Body;Body;Body;Body;Body                                              | -13733   | ABLIM2                    | ABLIM2       |
| cg26907405 | 4.73E-08 | 8.17E-06 | 5.999448 | 15  | 93609551 | Body;Body;Body;Body;Body;Body                                                   | 6834     | RGMA                      | RGMA         |
| cg16555595 | 4.74E-08 | 8.18E-06 | 5.998975 | 13  | 1.14E+08 | Body;Body;Body;Body;Body;Body;Body                                              | -37206   | TMCO3                     | TFDP1        |
| cg27146356 | 4.74E-08 | 8.18E-06 | 5.99897  | 16  | 56719841 | TESS000                                                                         | 3460     | MT1X                      | MT1X         |
| cg04995849 | 4.74E-08 | 8.18E-06 | 5.998851 | 1   | 1.15E+08 |                                                                                 | -29528   |                           | SIKE1        |
| cg09962925 | 4.74E-08 | 8.18E-06 | 5.99873  | 16  | 86228639 | TSS1500                                                                         | -1147    | LINC01082                 | LINC01082    |

| Probe      | p_adj    | q_val    | t        | Chr | Pos.hg19 | locations                                    | dist2TSS | gene.Illumina   | gene.nearest |
|------------|----------|----------|----------|-----|----------|----------------------------------------------|----------|-----------------|--------------|
| cg00493363 | 4.74E-08 | 8.18E-06 | 5.998723 | 7   | 1.07E+08 |                                              | -65375   |                 | PRKAR2B      |
| cg10987960 | 4.74E-08 | 8.18E-06 | 5.998684 | 3   | 1.57E+08 | TSS5000;TSS1500;TSS1500;TSS1500              | -1007    | VEPH1           | VEPH1        |
| cg13625620 | 4.75E-08 | 8.18E-06 | 5.998501 | 8   | 10273691 | Body;Body;Body;Body                          | -58383   | MSRA            | LINC-0001    |
| cg21992507 | 4.75E-08 | 8.18E-06 | 5.998476 | 11  | 6789940  | Body                                         | 248      | OR2AG2          | OR2AG2       |
| cg03646542 | 4.76E-08 | 8.19E-06 | 5.997923 | 5   | 1.72E+08 | Body;Body;Body                               | 7890     | NEURL1B         | NEURL1B      |
| cg11832804 | 4.76E-08 | 8.19E-06 | 5.997776 | 5   | 1279449  | Body;Body;Body;Body                          | 15734    | TERT            | TERT         |
| cg16094073 | 4.76E-08 | 8.19E-06 | 5.997724 | 1   | 2.21E+08 |                                              | -55062   |                 | RAB3GAP2     |
| cg05041871 | 4.76E-08 | 8.19E-06 | 5.997625 | 2   | 1732234  | Body                                         | 16053    | PXDN            | PXDN         |
| cg08435240 | 4.76E-08 | 8.19E-06 | 5.997579 | 21  | 39643733 | Body;Body;Body;Body;Body;Body;Body;TSS1500   | -608     | KCNJ15          | KCNJ15       |
| cg06164804 | 4.77E-08 | 8.19E-06 | 5.997397 | 2   | 2.4E+08  | Body                                         | -36767   | HDAC4           | MIR4441      |
| cg15470261 | 4.77E-08 | 8.19E-06 | 5.997387 | 19  | 1698699  |                                              | -46085   |                 | TCF3         |
| cg05014245 | 4.77E-08 | 8.19E-06 | 5.997386 | 10  | 82172262 | Body;Body;Body;Body;TSS1500;TSS1500          | -1312    | PRXL2A          | PRXL2A       |
| cg12401058 | 4.77E-08 | 8.19E-06 | 5.99738  | 13  | 23423130 |                                              | 49190    |                 | BASP1P1      |
| cg18391058 | 4.77E-08 | 8.19E-06 | 5.997354 | 1   | 6207067  | Body                                         | 33314    | CHD5            | CHD5         |
| cg11553153 | 4.77E-08 | 8.19E-06 | 5.997327 | 15  | 34348521 | Body;Body                                    | -17116   | CHRM5           | AVEN         |
| cg15821544 | 4.78E-08 | 8.20E-06 | 5.996774 | 1   | 43473840 |                                              | 49121    |                 | SLC2A1-AS1   |
| cg12398117 | 4.78E-08 | 8.21E-06 | 5.996595 | 5   | 76474556 | TSS5000;TSS5000                              | -1572    | PDE8B           | PDE8B        |
| cg27526892 | 4.79E-08 | 8.22E-06 | 5.996191 | 1   | 3372482  | Body                                         | 1254     | ARHGEF16        | ARHGEF16     |
| cg26842720 | 4.80E-08 | 8.23E-06 | 5.995797 | 8   | 62212734 | 1stExon                                      | 12206    | CLVS1           | CLVS1        |
| cg07698783 | 4.80E-08 | 8.23E-06 | 5.99575  | 11  | 47395915 | Body;Body                                    | 4183     | SPI1            | SPI1         |
| cg07373589 | 4.81E-08 | 8.24E-06 | 5.995244 | 1   | 6189304  | Body                                         | 51077    | CHD5            | CHD5         |
| cg08880875 | 4.82E-08 | 8.25E-06 | 5.994813 | 2   | 74873273 | Body;Body;Body;Body                          | 1891     | M1AP            | M1AP         |
| cg09040752 | 4.82E-08 | 8.25E-06 | 5.9948   | 17  | 41003155 | TSS5000;TSS5000;TSS200;TSS200;TSS200;TSS5000 | -45      | AOC2;AOC3       | AOC3         |
| cg02155184 | 4.82E-08 | 8.25E-06 | 5.994702 | 1   | 1.1E+08  | 3'UTR;TSS5000                                | -3995    | GPR61;GNAI3     | GNAI3        |
| cg02508229 | 4.83E-08 | 8.25E-06 | 5.994551 | 1   | 27336989 | Body                                         | 2352     | TENT5B          | TENT5B       |
| cg00543840 | 4.83E-08 | 8.25E-06 | 5.994421 | 1   | 22213376 | Body;Body                                    | 50427    | HSPG2           | HSPG2        |
| cg24445724 | 4.83E-08 | 8.26E-06 | 5.99419  | 1   | 1.55E+08 | TSS5000;Body;Body;Body;Body                  | 2813     | MIR92B;THBS3    | MIR92B       |
| cg23323468 | 4.84E-08 | 8.26E-06 | 5.994049 | 2   | 2.29E+08 |                                              | -15037   |                 | C2orf83      |
| cg16806051 | 4.84E-08 | 8.26E-06 | 5.994024 | 6   | 1.69E+08 |                                              | -57298   |                 | DACT2        |
| cg03096286 | 4.84E-08 | 8.26E-06 | 5.993873 | 2   | 2.19E+08 | Body;TSS5000;TSS5000                         | -1768    | CATIP-AS2;CATIP | CATIP        |
| cg01076675 | 4.85E-08 | 8.27E-06 | 5.993404 | 19  | 7977612  | 3'UTR;3'UTR;3'UTR;TSS5000                    | -3419    | MAP2K7;TGFB3L   | TGFB3L       |
| cg09068492 | 4.86E-08 | 8.29E-06 | 5.992971 | 11  | 14993658 | Body;Body;Body;Body                          | 174      | CALCA           | CALCA        |
| cg18327319 | 4.87E-08 | 8.30E-06 | 5.992386 | 1   | 11795409 | TSS1500;TSS1500;TSS1500;TSS1500              | -732     | AGTRAP          | AGTRAP       |
| cg00278329 | 4.88E-08 | 8.32E-06 | 5.991858 | 16  | 31440531 | TSS5000;TSS5000;TSS1500                      | -850     | ITGAD;COX6A2    | COX6A2       |
| cg12790106 | 4.89E-08 | 8.33E-06 | 5.991464 | 15  | 63105204 | Body                                         | -10951   | TLN2            | MIR190A      |
| cg129369   |          |          |          |     |          |                                              |          |                 |              |

| Probe      | p_adj    | q_val    | t        | Chr | Pos.hg19 | locations                                                                                       | dist2TSS | gene.Illumina                 | gene.nearest |
|------------|----------|----------|----------|-----|----------|-------------------------------------------------------------------------------------------------|----------|-------------------------------|--------------|
| cg17046756 | 4.98E-08 | 8.40E-06 | 5.987391 | 11  | 1855851  | Body;Body;Body;Body;TSS5000;TSS5000                                                             | 195      | SYT8;TNNI2                    | SYT8         |
| cg26081974 | 4.99E-08 | 8.41E-06 | 5.987058 | 13  | 1.14E+08 | Body                                                                                            | 2811     | LOC101928841                  | LOC101928841 |
| cg03722908 | 4.99E-08 | 8.41E-06 | 5.986728 | 6   | 1.65E+08 |                                                                                                 | 477386   |                               | MEAT6        |
| cg25660265 | 4.99E-08 | 8.41E-06 | 5.986701 | 4   | 4785832  | Body                                                                                            | 22346    | LOC101928279                  | LOC101928279 |
| cg19993573 | 5.00E-08 | 8.41E-06 | 5.986614 | 8   | 1495289  | Body                                                                                            | 74541    | DLGAP2                        | DLGAP2-AS1   |
| cg06053862 | 5.00E-08 | 8.42E-06 | 5.986243 | 11  | 68028857 | 3'UTR;3'UTR                                                                                     | 10584    | C11orf24                      | C11orf24     |
| cg11215013 | 5.01E-08 | 8.44E-06 | 5.985862 | 16  | 89777115 | Body;TSS1500                                                                                    | -1148    | VPS9D1;VPS9D1-AS1             | VPS9D1-AS1   |
| cg03669198 | 5.02E-08 | 8.44E-06 | 5.985523 | 6   | 33374377 | Body;TSS5000;TSS5000;TSS5000                                                                    | -4413    | KIFC1;PHF1                    | PHF1         |
| cg07359183 | 5.02E-08 | 8.44E-06 | 5.985443 | 1   | 2.08E+08 | Body                                                                                            | 59711    | PLXNA2                        | PLXNA2       |
| cg06360527 | 5.03E-08 | 8.46E-06 | 5.984939 | 17  | 7491548  | TSS5000;TSS5000;TSS5000;TSS5000;TSS5000;TSS5000;3'UTR;TSS5000                                   | 1864     | LOC100996842;MPDU1;SOX15;FXR2 | SOX15        |
| cg08970446 | 5.04E-08 | 8.46E-06 | 5.98468  | 1   | 53608262 | 5'UTR;5'UTR;5'UTR;Body;5'UTR                                                                    | 48       | SLC1A7                        | SLC1A7       |
| cg26937943 | 5.04E-08 | 8.46E-06 | 5.984635 | 18  | 8800248  | Body                                                                                            | 82870    | MTCL1                         | MTCL1        |
| cg19410265 | 5.04E-08 | 8.46E-06 | 5.984591 | 22  | 18897735 | Body;TSS5000;TSS5000                                                                            | 3903     | DGCR6;PRODH                   | DGCR6        |
| cg14492061 | 5.04E-08 | 8.46E-06 | 5.984539 | 3   | 63637129 | TSS1500;TSS1500                                                                                 | -1221    | SNTN                          | SNTN         |
| cg16582836 | 5.04E-08 | 8.46E-06 | 5.984491 | 1   | 6952297  | TSS5000;TSS5000;TSS5000;Body;Body;Body;Body;TSS5000                                             | 106784   | CAMTA1                        | CAMTA1       |
| cg11525548 | 5.04E-08 | 8.46E-06 | 5.98444  | 1   | 7611041  | Body;Body;Body;Body;Body                                                                        | -118748  | CAMTA1                        | CAMTA1       |
| cg17209280 | 5.06E-08 | 8.48E-06 | 5.983646 | 3   | 16834977 |                                                                                                 | -91470   |                               | PLCL2        |
| cg14973055 | 5.06E-08 | 8.48E-06 | 5.983595 | 17  | 72306038 | Body;Body;Body;Body                                                                             | -16326   | DNAI2                         | KIF19        |
| cg08644340 | 5.06E-08 | 8.48E-06 | 5.983546 | 5   | 72585503 |                                                                                                 | -48229   |                               | LINC02230    |
| cg11514462 | 5.06E-08 | 8.48E-06 | 5.983501 | 11  | 1.21E+08 | Body                                                                                            | 27919    | TECTA                         | TECTA        |
| cg11413763 | 5.07E-08 | 8.49E-06 | 5.983294 | 1   | 9365494  | Body                                                                                            | 12542    | SPSB1                         | SPSB1        |
| cg23141614 | 5.08E-08 | 8.50E-06 | 5.982817 | 6   | 1.67E+08 | Body;Body;Body                                                                                  | -95693   | RPS6KA2                       | RPS6KA2      |
| cg22377480 | 5.08E-08 | 8.50E-06 | 5.9827   | 3   | 35934217 |                                                                                                 | 148250   |                               | MIR128-2     |
| cg09946870 | 5.08E-08 | 8.50E-06 | 5.982528 | 8   | 1.42E+08 | Body;Body;Body;Body                                                                             | 49073    | DENND3                        | SLC45A4      |
| cg07304551 | 5.09E-08 | 8.50E-06 | 5.982427 | 16  | 85618571 |                                                                                                 | -26443   |                               | GSE1         |
| cg02452209 | 5.10E-08 | 8.53E-06 | 5.981589 | 7   | 1.58E+08 | Body;Body;Body;Body;Body                                                                        | 264604   | PTPRN2                        | MIR595       |
| cg17016369 | 5.11E-08 | 8.53E-06 | 5.98155  | 2   | 1.98E+08 |                                                                                                 | 53539    |                               | SF3B1        |
| cg18857216 | 5.11E-08 | 8.53E-06 | -5.98153 | 1   | 11021217 | Body;Body                                                                                       | 5527     | C1orf127                      | C1orf127     |
| cg16871520 | 5.13E-08 | 8.56E-06 | 5.98064  | 3   | 52442033 | Body;TSS5000;TSS5000;TSS5000;TSS5000                                                            | 1991     | BAP1;PHF7                     | BAP1         |
| cg00798342 | 5.14E-08 | 8.57E-06 | 5.980202 | 12  | 1.11E+08 | TSS5000;TSS5000;TSS5000                                                                         | -2217    | HVCN1                         | HVCN1        |
| cg02523263 | 5.14E-08 | 8.57E-06 | 5.980111 | 12  | 64687265 | Body;Body                                                                                       | -71189   | C12orf56                      | C12orf56     |
| cg27478879 | 5.14E-08 | 8.57E-06 | 5.980014 | 9   | 1.39E+08 | TSS5000;Body                                                                                    | -7551    | GPSM1                         | GPSM1        |
| cg11567627 | 5.15E-08 | 8.58E-06 | 5.979646 | 5   | 1.19E+08 |                                                                                                 | -46899   |                               | FAM170A      |
| cg16977304 | 5.15E-08 | 8.59E-06 | 5.979362 | 13  | 20134785 | Body                                                                                            | 929      | TPTE2                         | TPTE2        |
| cg14070323 | 5.16E-08 | 8.59E-06 | 5.979317 | 14  | 1.01E+08 | TSS1500;TSS1500;TSS1500;TSS1500;TSS1500;TSS1500;TSS1500;TSS1500;TSS1500;TSS1500;TSS1500;TSS1500 | -588     | MEG3                          | MEG3         |
| cg00391247 | 5.16E-08 | 8.59E-06 | 5.979033 | 12  | 31378024 |                                                                                                 | -23855   |                               | OVO52        |
| cg27182133 | 5.16E-08 | 8.59E-06 | 5.978974 | 1   | 10658147 | Body                                                                                            | 123141   | PEX14                         | PEX14        |
| cg16618389 | 5.16E-08 | 8.59E-06 | 5.978893 | 12  | 46865385 | Body;Body;Body;Body;Body                                                                        | 87496    | LOC100288798                  | LOC100288798 |
| cg25770411 | 5.18E-08 | 8.61E-06 | 5.978243 | 7   | 73946901 | Body;Body;Body                                                                                  | -63393   | GTF2IRD1                      | MIR10525     |
| cg02387639 | 5.18E-08 | 8.61E-06 | 5.978164 | 3   | 1.79E+08 | Body                                                                                            | 13466    | USP13                         | USP13        |
| cg16811875 | 5.18E-08 | 8.62E-06 | 5.978012 | 7   | 1.32E+08 | 1stExon;1stExon;1stExon                                                                         | 68406    | PLXNA4                        | PLXNA4       |
| cg00765127 | 5.20E-08 | 8.64E-06 | 5.977205 | 8   | 22959168 | Body;TSS1500                                                                                    | -1158    | LOC254896;TNFRSF10C           | TNFRSF10C    |
| cg11920592 | 5.20E-08 | 8.64E-06 | 5.977155 | 6   | 1.12E+08 | Body;Body                                                                                       | -45426   | FYN                           | FYN          |
| cg19275091 | 5.21E-08 | 8.65E-06 | 5.976811 | 1   | 1.2E+08  |                                                                                                 | -10053   |                               | LINC01780    |
| cg24101387 | 5.21E-08 | 8.65E-06 | 5.976806 | 6   | 2510586  |                                                                                                 | -124147  |                               | LINC02521    |
| cg23499929 | 5.21E-08 | 8.65E-06 | 5.976653 | 17  | 79097152 | Body;Body;TSS5000;TSS5000;TSS5000                                                               | 2021     | AATK;MIR657;MIR3065;MIR338    | MIR657       |
| cg11204562 | 5.21E-08 | 8.65E-06 | 5.976644 | 10  | 1.16E+08 | TSS1500;TSS1500;TSS1500                                                                         | -287     | PLEKHS1                       | PLEKHS1      |
| cg10600536 | 5.22E-08 | 8.66E-06 | 5.976262 | 11  | 47608204 | TSS5000;5'UTR;5'UTR;5'UTR;5'UTR;TSS5000                                                         | 2        | NDUFS3;FAM180B;C1QTNF4        | FAM180B      |
| cg11929693 | 5.23E-08 | 8.66E-06 | 5.976157 | 5   | 1.35E+08 | Body;Body                                                                                       | 8278     | C5orf66;C5orf66-AS2           | C5orf66-AS2  |
| cg16598668 | 5.23E-08 | 8.66E-06 | 5.976147 | 7   | 82159556 |                                                                                                 | -86284   |                               | CACNA2D1     |
| cg06250841 | 5.23E-08 | 8.66E-06 | 5.975893 | 8   | 58138048 | Body                                                                                            | 7214     | LINC01606                     | LINC01606    |
| cg08290287 | 5.24E-08 | 8.68E-06 | 5.975367 | 19  | 42744095 | Body                                                                                            | 2659     | GSK3A                         | GSK3A        |
| cg06406822 | 5.24E-08 | 8.68E-06 | 5.975321 | 5   | 1.76E+08 | 3'UTR                                                                                           | 9347     | RNF44                         | RNF44        |
| cg11154727 | 5.25E-08 | 8.68E-06 | 5.975079 | 5   | 85189638 |                                                                                                 | -388623  |                               | NBPFF22P     |
| cg15445319 | 5.25E-08 | 8.68E-06 | 5.975006 | 17  | 72997680 | Body                                                                                            | -11084   | CDR2L                         | MRPL58       |
| cg07518851 | 5.26E-08 | 8.69E-06 | 5.974725 | 10  | 1.35E+08 | 3'UTR                                                                                           | -5274    | KNDC1                         | UTF1         |
| cg25324021 | 5.26E-08 | 8.69E-06 | 5.974682 | 13  | 27261076 | 3'UTR;3'UTR                                                                                     | 73847    | WASF3                         | GPR12        |
| cg25682188 | 5.26E-08 | 8.69E-06 | 5.974533 | 2   | 75278194 | Body;3'UTR                                                                                      | -39744   | TACR1                         | MIR5000      |
| cg23199797 | 5.26E-08 | 8.69E-06 | 5.974443 | 3   | 1.22E+08 | Body;Body                                                                                       | -63252   | CASR                          | CSTA         |

| Probe      | p_adj    | q_val    | t        | Chr | Pos.hg19 | locations                                                                                                       | dist2TSS | gene.Illumina                | gene.nearest |
|------------|----------|----------|----------|-----|----------|-----------------------------------------------------------------------------------------------------------------|----------|------------------------------|--------------|
| cg19046730 | 5.27E-08 | 8.69E-06 | 5.974423 | 10  | 81943774 | Body;Body;Body;Body;Body;Body                                                                                   | 20473    | ANXA11                       | ANXA11       |
| cg08822523 | 5.27E-08 | 8.69E-06 | 5.974401 | 4   | 91156290 | Body;5'UTR                                                                                                      | 109      | CCSER1                       | CCSER1       |
| cg24360909 | 5.27E-08 | 8.69E-06 | 5.974332 | 15  | 49189538 | Body                                                                                                            | 19208    | SHC4                         | EID1         |
| cg15242048 | 5.28E-08 | 8.70E-06 | 5.9738   | 2   | 2.34E+08 | Body;Body                                                                                                       | 4239     | NGEF                         | NGEF         |
| cg09834343 | 5.28E-08 | 8.70E-06 | 5.973795 | 15  | 32942910 | Body;Body;Body                                                                                                  | 9097     | ARHGAP11A-SCG5;SCG5          | SCG5         |
| cg07379741 | 5.28E-08 | 8.70E-06 | 5.973684 | 17  | 7311030  | TSS5000;TSS5000;TSS200                                                                                          | -133     | TMEM256-PLSCR3;TMEM256;NLGN2 | NLGN2        |
| cg09995105 | 5.29E-08 | 8.70E-06 | 5.973439 | 1   | 1.86E+08 | Body                                                                                                            | 3589     | HMCN1                        | HMCN1        |
| cg08106205 | 5.29E-08 | 8.70E-06 | 5.973425 | 1   | 2062664  | Body;Body;Body;Body;Body;Body;Body;Body                                                                         | 26510    | PRKCZ                        | PRKCZ        |
| cg05410536 | 5.29E-08 | 8.70E-06 | 5.973373 | 14  | 69754550 | Body;Body                                                                                                       | 27676    | GALNT16                      | GALNT16      |
| cg12636499 | 5.29E-08 | 8.71E-06 | 5.973166 | 10  | 1.05E+08 | Body;Body                                                                                                       | 29374    | SH3PXD2A                     | SH3PXD2A     |
| cg02280348 | 5.30E-08 | 8.71E-06 | 5.973105 | 14  | 22011087 |                                                                                                                 | -5832    |                              | SALL2        |
| cg25155149 | 5.30E-08 | 8.71E-06 | 5.972861 | 10  | 1.02E+08 | TSS5000;TSS5000;TSS5000;TSS5000;TSS5000;3'UTR;3'UTR                                                             | -1668    | BLOC1S2;PKD2L1               | BLOC1S2      |
| cg14152608 | 5.32E-08 | 8.73E-06 | 5.972018 | 10  | 3159711  | Body;Body;Body;Body;Body;Body;Body;Body;Body                                                                    | 12911    | PFKP                         | PFKP         |
| cg25143743 | 5.32E-08 | 8.73E-06 | 5.972016 | 5   | 10725546 | Body;Body                                                                                                       | 35800    | DAP                          | DAP          |
| cg12178225 | 5.32E-08 | 8.73E-06 | 5.971999 | 6   | 30165961 | Body;Body                                                                                                       | 15222    | TRIM26                       | TRIM26       |
| cg03180404 | 5.32E-08 | 8.73E-06 | 5.971968 | 11  | 1.27E+08 |                                                                                                                 | -29413   |                              | LOC101929473 |
| cg16429208 | 5.33E-08 | 8.73E-06 | 5.971788 | 1   | 2.48E+08 | Body;Body;Body;Body;Body;Body;Body;TSS5000                                                                      | 1104     | GCSAML;GCSAML-AS1;OR2C3      | GCSAML-AS1   |
| cg00936728 | 5.33E-08 | 8.73E-06 | 5.971736 | 1   | 1.6E+08  | Body;5'UTR                                                                                                      | 45       | FCRL6                        | FCRL6        |
| cg12136716 | 5.33E-08 | 8.73E-06 | 5.971712 | 3   | 57722951 |                                                                                                                 | -20031   |                              | SLMAP        |
| cg00972950 | 5.34E-08 | 8.75E-06 | 5.971212 | 4   | 1684791  | Body;Body;Body                                                                                                  | 927      | FAM53A                       | FAM53A       |
| cg07416364 | 5.34E-08 | 8.75E-06 | 5.971146 | 2   | 2.01E+08 |                                                                                                                 | -17932   |                              | FTCDNL1      |
| cg24194730 | 5.35E-08 | 8.76E-06 | 5.970859 | 11  | 47436603 | Body;Body;Body;Body;TSS5000                                                                                     | 6463     | SLC39A13;PSMC3               | SLC39A13     |
| cg00094943 | 5.35E-08 | 8.76E-06 | 5.97055  | 7   | 1.5E+08  | Body                                                                                                            | -9780    | ZNF775                       | LOC728743    |
| cg14824983 | 5.36E-08 | 8.77E-06 | 5.970368 | 3   | 50304424 | Body;TSS1500;TSS1500;TSS5000;TSS5000                                                                            | 379      | SEMA3B-AS1;SEMA3B            | SEMA3B-AS1   |
| cg22044669 | 5.36E-08 | 8.77E-06 | 5.970104 | 22  | 32369286 | Body                                                                                                            | 2477     | LINC02558                    | LINC02558    |
| cg04246526 | 5.37E-08 | 8.77E-06 | 5.970043 | 3   | 43033200 | Body                                                                                                            | 12398    | GASK1A                       | GASK1A       |
| cg24995503 | 5.37E-08 | 8.77E-06 | 5.970008 | 14  | 1.03E+08 |                                                                                                                 | -12685   |                              | RCOR1        |
| cg02924954 | 5.37E-08 | 8.77E-06 | 5.96999  | 10  | 1262895  | Body                                                                                                            | 57188    | ADARB2                       | LINC00200    |
| cg24742092 | 5.38E-08 | 8.78E-06 | 5.969487 | 1   | 20251280 | TSS1500                                                                                                         | -1170    | PLA2G2E                      | PLA2G2E      |
| cg11804604 | 5.38E-08 | 8.78E-06 | 5.969428 | 1   | 1.57E+08 | TSS5000;3'UTR;3'UTR;TSS5000                                                                                     | 1180     | LRR71;ARHGEF11;MIR765        | MIR765       |
| cg25184717 | 5.38E-08 | 8.78E-06 | 5.969416 | 17  | 79354866 | Body;Body                                                                                                       | 4059     | LOC100130370                 | LOC100130370 |
| cg26635367 | 5.38E-08 | 8.78E-06 | 5.969288 | 4   | 1.66E+08 | Body;Body;Body;TSS200;TSS200                                                                                    | -51      | KLHL2                        | KLHL2        |
| cg18410168 | 5.40E-08 | 8.80E-06 | 5.968698 | 19  | 35843282 | 1stExon                                                                                                         | 838      | FFAR1                        | FFAR1        |
| cg17243636 | 5.40E-08 | 8.80E-06 | 5.968569 | 10  | 1.34E+08 |                                                                                                                 | -40341   |                              | BNIP3        |
| cg17313222 | 5.41E-08 | 8.82E-06 | 5.968086 | 8   | 96213626 |                                                                                                                 | 14976    |                              | LINC01298    |
| cg07594007 | 5.42E-08 | 8.83E-06 | 5.96775  | 10  | 1.12E+08 | TSS200                                                                                                          | -50      | LOC105378479                 | LOC105378479 |
| cg13904508 | 5.42E-08 | 8.83E-06 | 5.96763  | 1   | 1.12E+08 | Body;Body;Body;Body;Body;Body;Body;Body;Body;Body;Body;Body;Body;Body;Body;Body;TSS5000;TSS5000;TSS5000;TSS5000 | -2686    | DRAM2;CEPT1                  | CEPT1        |
| cg22334548 | 5.42E-08 | 8.83E-06 | 5.967606 | 19  | 49971665 | Body;Body                                                                                                       | -5806    | ALDH16A1                     | FLT3LG       |
| cg15035324 | 5.42E-08 | 8.83E-06 | 5.967542 | 2   | 46269605 | Body                                                                                                            | -254940  | PRKE                         | EPAS1        |
| cg24347822 | 5.43E-08 | 8.83E-06 | 5.967364 | 2   | 2.37E+08 | Body;Body;Body                                                                                                  | -294118  | AGAP1                        | TNRC17       |
| cg15546282 | 5.43E-08 | 8.83E-06 | 5.967272 | 1   | 1903425  | Body                                                                                                            | 31800    | CFAP74                       | CFAP74       |
| cg08329561 | 5.44E-08 | 8.84E-06 | 5.966903 | 10  | 79997038 |                                                                                                                 | -11343   |                              | LINC00856    |
| cg27646075 | 5.45E-08 | 8.86E-06 | 5.966367 | 11  | 1.18E+08 | TSS1500                                                                                                         | -862     | SCN2B                        | SCN2B        |
| cg23613162 | 5.46E-08 | 8.87E-06 | 5.965915 | 1   | 27891416 | Body;Body                                                                                                       | 38589    | AHDC1                        | AHDC1        |
| cg24875415 | 5.46E-08 | 8.87E-06 | 5.965898 | 20  | 23669470 | 1stExon                                                                                                         | 192      | CST4                         | CST4         |
| cg20359147 | 5.47E-08 | 8.89E-06 | 5.965411 | 6   | 226092   |                                                                                                                 | -20608   |                              | LOC285766    |
| cg15714692 | 5.48E-08 | 8.89E-06 | 5.965332 | 11  | 57519659 | Body;TSS1500                                                                                                    | -406     | TMX2-CTNND1;BTBD18           | BTBD18       |
| cg20540969 | 5.48E-08 | 8.89E-06 | 5.965042 | 2   | 2.36E+08 | Body;Body;Body;Body;Body                                                                                        | 26043    | SH3BP4                       | SH3BP4       |
| cg09412782 | 5.49E-08 | 8.90E-06 | 5.96485  | 15  | 45721589 | TSS1500;TSS1500;TSS5000                                                                                         | -1137    | C15orf48;MIR147B             | C15orf48     |
| cg07255158 | 5.49E-08 | 8.90E-06 | 5.964672 | 13  | 1.12E+08 |                                                                                                                 | 73530    |                              | LINC02337    |
| cg15161827 | 5.49E-08 | 8.90E-06 | 5.964638 | 1   | 16318994 |                                                                                                                 | -11736   |                              | SRARP        |
| cg20342907 | 5.50E-08 | 8.90E-06 | 5.964508 | 11  | 1.18E+08 | Body;Body;Body;Body                                                                                             | 10551    | TMPPRSS13                    | TMPPRSS13    |
| cg21687300 | 5.50E-08 | 8.91E-06 | 5.964322 | 1   | 52284363 | Body;Body;Body                                                                                                  | 17711    | NRDC                         | MIR761       |
| cg03283124 | 5.51E-08 | 8.91E-06 | 5.963993 | 13  | 67802272 | 1stExon;1stExon;1stExon;Body                                                                                    | 2196     | PCDH9                        | PCDH9        |
| cg07025157 | 5.51E-08 | 8.92E-06 | 5.963739 | 4   | 1.28E+08 |                                                                                                                 | -491354  |                              | INTU         |
| cg03033996 | 5.52E-08 | 8.92E-06 | 5.963647 | 4   | 8071486  | Body;Body;Body;Body;Body;Body;Body                                                                              | 2229     | ABLIM2                       | ABLIM2       |
| cg03968976 | 5.53E-08 | 8.94E-06 | 5.963084 | 11  | 64273016 |                                                                                                                 | -50396   |                              | SLC22A11     |
| cg17217194 | 5.54E-08 | 8.96E-06 | 5.96252  | 4   | 3870523  |                                                                                                                 | 86632    |                              | FAM86EP      |





| Probe      | p_adj    | q_val    | t        | Chr | Pos.hg19 | locations                                                                                    | dist2TSS | gene.Illumina                                            | gene.nearest |
|------------|----------|----------|----------|-----|----------|----------------------------------------------------------------------------------------------|----------|----------------------------------------------------------|--------------|
| cg07670676 | 6.16E-08 | 9.56E-06 | 5.937868 | 10  | 1E+08    | Body;TESS000;TESS000;TESS000;TESS000;TESS000;TESS000;TESS000;TESS000;TESS000;TESS000;TESS000 | 3250     | PYROXD2;HPS1                                             | PYROXD2      |
| cg12178316 | 6.17E-08 | 9.56E-06 | 5.937735 | 15  | 22944125 | Body;Body;Body;Body;Body;Body;Body;Body                                                      | -11629   | CYFIP1                                                   | CYFIP1       |
| cg19640585 | 6.18E-08 | 9.58E-06 | 5.937354 | 6   | 1.44E+08 | Body;Body;Body;Body                                                                          | 75516    | PHACTR2                                                  | PHACTR2      |
| cg22156852 | 6.18E-08 | 9.58E-06 | 5.937086 | 1   | 1.13E+08 | Body                                                                                         | 6847     | CTTNBP2NL                                                | CTTNBP2NL    |
| cg21249563 | 6.19E-08 | 9.59E-06 | 5.936838 | 2   | 29297717 | TSS1500                                                                                      | -328     | PCARE                                                    | PCARE        |
| cg27019059 | 6.20E-08 | 9.60E-06 | 5.936495 | 3   | 1.34E+08 |                                                                                              | -76031   |                                                          | LINC02000    |
| cg22916215 | 6.20E-08 | 9.60E-06 | 5.936342 | 14  | 1E+08    | Body                                                                                         | 14623    | CCDC85C                                                  | CCDC85C      |
| cg16998016 | 6.21E-08 | 9.62E-06 | 5.935977 | 7   | 4051915  | Body                                                                                         | -117401  | SDK1                                                     | SDK1         |
| cg16693369 | 6.22E-08 | 9.63E-06 | 5.935561 | 4   | 1.56E+08 |                                                                                              | -13579   |                                                          | FGG          |
| cg17873456 | 6.23E-08 | 9.63E-06 | 5.935478 | 13  | 1.07E+08 |                                                                                              | 55647    |                                                          | EFNB2        |
| cg00507477 | 6.23E-08 | 9.63E-06 | 5.935244 | 15  | 90292483 | TESS000                                                                                      | 2057     | MESP1                                                    | MESP1        |
| cg17221945 | 6.23E-08 | 9.63E-06 | 5.935211 | 1   | 39953603 | TESS000;TSS000                                                                               | -3704    | MACF1;BMP8A                                              | BMP8A        |
| cg27073349 | 6.23E-08 | 9.63E-06 | 5.935188 | 4   | 3640481  |                                                                                              | 39101    |                                                          | LINC02171    |
| cg05126581 | 6.24E-08 | 9.64E-06 | 5.935004 | 1   | 2.16E+08 | Body                                                                                         | -100987  | USH2A                                                    | LOC102723833 |
| cg08251765 | 6.24E-08 | 9.64E-06 | 5.934924 | 8   | 1.36E+08 | Body;Body;Body;Body;Body;Body                                                                | 31767    | ZFAT                                                     | ZFAT-AS1     |
| cg25353436 | 6.25E-08 | 9.64E-06 | 5.934701 | 10  | 10839523 | Body;Body;Body;Body;Body;Body;TSS000;Body;Body;TSS1500;TSS1500;TSS1500                       | 722      | CELF2;SFTA1P                                             | CELF2        |
| cg27054948 | 6.28E-08 | 9.69E-06 | 5.93345  | 8   | 18537539 | Body;Body;Body                                                                               | 128838   | PSD3                                                     | PSD3         |
| cg12150538 | 6.29E-08 | 9.69E-06 | 5.933216 | 12  | 92886824 |                                                                                              | 26370    |                                                          | LINC02397    |
| cg19120695 | 6.29E-08 | 9.69E-06 | 5.933211 | 4   | 7528947  | Body                                                                                         | 67193    | SORCS2                                                   | MIR4274      |
| cg14171369 | 6.29E-08 | 9.70E-06 | 5.933009 | 14  | 75447688 |                                                                                              | -21935   |                                                          | EIF2B2       |
| cg20227326 | 6.30E-08 | 9.71E-06 | 5.932608 | 8   | 25227128 | Body                                                                                         | -8100    | DOCK5                                                    | LOC105379331 |
| cg25196881 | 6.31E-08 | 9.72E-06 | 5.932423 | 15  | 39780412 |                                                                                              | -92867   |                                                          | THBS1        |
| cg23330006 | 6.32E-08 | 9.73E-06 | 5.932094 | 12  | 1.07E+08 | Body                                                                                         | 26098    | NUAK1                                                    | NUAK1        |
| cg00866295 | 6.32E-08 | 9.73E-06 | 5.931871 | 1   | 2.04E+08 | Body;Body;Body;Body                                                                          | -38232   | ATP2B4                                                   | SNORA77      |
| cg21828629 | 6.33E-08 | 9.73E-06 | 5.931799 | 1   | 2.06E+08 | TSS1500;TSS1500                                                                              | -834     | SLC26A9                                                  | SLC26A9      |
| cg23051970 | 6.33E-08 | 9.73E-06 | 5.931747 | 17  | 75284193 | Body;Body;5'UTR                                                                              | 221      | SEPTIN9                                                  | SEPTIN9      |
| cg02941286 | 6.33E-08 | 9.73E-06 | 5.93173  | 4   | 778336   | TSS000;TSS000;TSS000;TSS000                                                                  | -2700    | LOC100129917;CPLX1                                       | LOC100129917 |
| cg11337160 | 6.35E-08 | 9.76E-06 | 5.931013 | 22  | 36014182 | TSS1500;TSS1500;Body;Body                                                                    | -627     | MB                                                       | MB           |
| cg08552167 | 6.35E-08 | 9.76E-06 | 5.930767 | 10  | 1.35E+08 | Body;Body                                                                                    | 39542    | INPP5A                                                   | NKX6-2       |
| cg21492137 | 6.36E-08 | 9.76E-06 | 5.930723 | 14  | 1.02E+08 | TESS000;TESS000;TESS000;TESS000;TSS200;TSS1500;TSS000;TSS000                                 | -152     | MIR134;MIR668;MIR485;MIR323B;MIR154;MIR496;MIR377;MIR541 | MIR154       |
| cg09681025 | 6.36E-08 | 9.76E-06 | 5.930689 | 2   | 1.84E+08 | TSS000;TSS000;TSS000;TSS000;TSS000                                                           | -3358    | DNAJC10                                                  | DNAJC10      |
| cg13188915 | 6.36E-08 | 9.76E-06 | 5.930586 | 12  | 25622615 |                                                                                              | 83602    |                                                          | LMNTD1       |
| cg14744919 | 6.36E-08 | 9.76E-06 | 5.930448 | 8   | 17269638 | Body                                                                                         | 1222     | MTMR7                                                    | MTMR7        |
| cg22685502 | 6.37E-08 | 9.76E-06 | 5.930179 | 3   | 72496851 | TSS1500                                                                                      | -1077    | RYBP                                                     | RYBP         |
| cg08928038 | 6.37E-08 | 9.76E-06 | 5.930147 | 17  | 39868610 | 5'UTR                                                                                        | 28       | GAST                                                     | GAST         |
| cg14447703 | 6.37E-08 | 9.76E-06 | 5.930138 | 6   | 30846517 | TSS000                                                                                       | -3872    | DDR1                                                     | DDR1         |
| cg08306084 | 6.37E-08 | 9.76E-06 | 5.930123 | 6   | 33248546 | TESS000;TESS000;Body;Body                                                                    | 3647     | RPS18;B3GALT4;WDR46                                      | B3GALT4      |
| cg21023831 | 6.37E-08 | 9.76E-06 | 5.930103 | 2   | 2.19E+08 | Body;Body;Body;TSS000                                                                        | -4433    | TNS1;MIR6809                                             | MIR6809      |
| cg01949837 | 6.38E-08 | 9.77E-06 | 5.929755 | 8   | 1.33E+08 | Body;Body                                                                                    | -26325   | KCNQ3                                                    | HHLA1        |
| cg06513139 | 6.38E-08 | 9.77E-06 | 5.929723 | 19  | 4455923  | TSS1500;Body                                                                                 | -625     | UBXN6                                                    | UBXN6        |
| cg19961522 | 6.39E-08 | 9.77E-06 | 5.929563 | 20  | 30407388 | 1stExon                                                                                      | 230      | MYLK2                                                    | MYLK2        |
| cg10414006 | 6.39E-08 | 9.77E-06 | 5.929487 | 16  | 34984121 | Body                                                                                         | 3199     | LINC02167                                                | LINC02167    |
| cg18220799 | 6.41E-08 | 9.79E-06 | 5.928906 | 18  | 44099340 | Body;TSS1500;Body;TSS1500;Body                                                               | -291     | LOXHD1                                                   | LOXHD1       |
| cg01792145 | 6.41E-08 | 9.79E-06 | 5.928879 | 1   | 1.13E+08 | Body;Body;TSS1500                                                                            | -492     | SLC16A1;AKR7A2P1                                         | AKR7A2P1     |
| cg06738548 | 6.41E-08 | 9.79E-06 | 5.92883  | 15  | 94019180 |                                                                                              | 269886   |                                                          | LOC105370980 |
| cg03784197 | 6.43E-08 | 9.81E-06 | 5.928195 | 16  | 88471457 | Body                                                                                         | 22091    | ZNF469                                                   | ZNF469       |
| cg13108289 | 6.43E-08 | 9.81E-06 | 5.928054 | 14  | 1.05E+08 | TESS000;TESS000;Body;Body                                                                    | 17768    | PLD4;AHNAK2                                              | PLD4         |
| cg10986946 | 6.43E-08 | 9.81E-06 | 5.928024 | 11  | 12001622 | Body;Body;Body;Body                                                                          | 28564    | DKK3                                                     | DKK3         |
| cg22331294 | 6.43E-08 | 9.81E-06 | 5.927994 | 3   | 45698299 | Body                                                                                         | 32075    | LIMD1                                                    | LIMD1-AS1    |
| cg26182418 | 6.46E-08 | 9.86E-06 | 5.926814 | 14  | 89715336 | Body;Body                                                                                    | 168241   | FOXN3                                                    | FOXN3        |
| cg21757633 | 6.47E-08 | 9.86E-06 | 5.926669 | 22  | 50847567 | Body;Body;Body;Body;Body;Body;Body;Body;Body;Body;Body;Body;TSS000                           | 1697     | PPP6R2;MIR12114                                          | MIR12114     |
| cg03455107 | 6.48E-08 | 9.87E-06 | 5.926386 | 17  | 54509207 | Body;Body;Body                                                                               | -161852  | ANKFN1                                                   | NOG          |
| cg13374432 | 6.48E-08 | 9.87E-06 | 5.926353 | 15  | 86192745 | Body;Body;Body                                                                               | 29565    | AKAP13                                                   | AKAP13       |
| cg10860364 | 6.49E-08 | 9.88E-06 | 5.926027 | 17  | 27936184 | Body                                                                                         | 8951     | ANKRD13B                                                 | CORO6        |
| cg20642630 | 6.49E-08 | 9.88E-06 | 5.925917 | 8   | 22846006 | Body                                                                                         | 1243     | RHOBTB2                                                  | RHOBTB2      |
| cg10860802 | 6.50E-08 | 9.89E-06 | 5.925638 | 7   | 1.55E+08 | Body;Body;Body;Body;Body;Body;Body;Body;Body                                                 | -87624   | DPP6                                                     | PAXIP1-AS2   |
| cg23225572 | 6.50E-08 | 9.89E-06 | 5.925474 | 1   | 1.62E+08 | Body;Body;Body                                                                               | 3210     | NOS1AP                                                   | NOS1AP       |
| cg13947528 | 6.51E-08 | 9.90E-06 | 5.925222 | 9   | 1.37E+08 | Body;Body                                                                                    | -122055  | VAV2                                                     | SARDH        |

| Probe      | p_adj    | q_val    | t        | Chr | Pos.hg19 | locations                                                                                                               | dist2TSS | gene.Illumina         | gene.nearest |
|------------|----------|----------|----------|-----|----------|-------------------------------------------------------------------------------------------------------------------------|----------|-----------------------|--------------|
| cg22957339 | 6.52E-08 | 9.91E-06 | 5.924903 | 15  | 31246272 | Body                                                                                                                    | 37559    | MTMR10                | MTMR10       |
| cg07805345 | 6.52E-08 | 9.91E-06 | 5.924777 | 3   | 46922486 | Body;TSS1500                                                                                                            | -1252    | PTH1R                 | PTH1R        |
| cg17498476 | 6.53E-08 | 9.91E-06 | 5.924577 | 7   | 2052420  | Body;Body;Body;Body                                                                                                     | -72213   | MAD1L1                | MAD1L1       |
| cg18617770 | 6.53E-08 | 9.91E-06 | 5.924551 | 12  | 1.33E+08 |                                                                                                                         | -30797   | FBRS1                 | FBRS1        |
| cg02345148 | 6.54E-08 | 9.93E-06 | 5.924039 | 2   | 46678772 |                                                                                                                         | 22444    | LINC02583             | LINC02583    |
| cg12145085 | 6.55E-08 | 9.94E-06 | 5.923825 | 14  | 73289895 | Body;Body;Body;Body                                                                                                     | 69462    | DPF3                  | DPF3         |
| cg24710938 | 6.55E-08 | 9.94E-06 | 5.923772 | 13  | 36788861 | TSS200;Body;TSS200                                                                                                      | -109     | SOHLH2;CCDC169-SOHLH2 | SOHLH2       |
| cg26424967 | 6.56E-08 | 9.94E-06 | 5.923487 | 1   | 31197383 | TSS1500;Body                                                                                                            | -951     | MATN1;MATN1-AS1       | MATN1        |
| cg26859186 | 6.56E-08 | 9.94E-06 | 5.92347  | 7   | 1.57E+08 | Body;Body;Body;Body                                                                                                     | 15406    | PTPRN2                | MIR153-2     |
| cg20321706 | 6.56E-08 | 9.94E-06 | 5.923438 | 12  | 1.33E+08 | Body                                                                                                                    | -6102    | GALNT9                | LOC100130238 |
| cg07042007 | 6.56E-08 | 9.94E-06 | 5.923405 | 4   | 2303638  | Body;Body;Body                                                                                                          | -39802   | ZFYVE28               | MXD4         |
| cg11841288 | 6.58E-08 | 9.98E-06 | 5.922515 | 1   | 53842221 |                                                                                                                         | 48317    |                       | LINC01771    |
| cg21959757 | 6.59E-08 | 9.99E-06 | 5.922183 | 5   | 1.15E+08 |                                                                                                                         | -17389   |                       | LINCADL      |
| cg23049178 | 6.60E-08 | 9.99E-06 | 5.922079 | 3   | 72939830 | Body;Body                                                                                                               | 2634     | GXYLT2                | GXYLT2       |
| cg14559176 | 6.60E-08 | 9.99E-06 | 5.921944 | 9   | 1.39E+08 |                                                                                                                         | -19680   |                       | UBAC1        |
| cg00219792 | 6.60E-08 | 9.99E-06 | 5.921792 | 12  | 83053315 |                                                                                                                         | -27369   |                       | TMT2C        |
| cg25599641 | 6.62E-08 | 1.00E-05 | 5.921274 | 22  | 42456139 | 3'UTR;3'UTR;3'UTR                                                                                                       | 10677    | NAGA                  | NAGA         |
| cg00646185 | 6.62E-08 | 1.00E-05 | 5.921118 | 15  | 26234833 | Body                                                                                                                    | 87327    | LINC02346             | LINC02346    |
| cg16884601 | 6.63E-08 | 1.00E-05 | 5.920787 | 11  | 65712968 | TSS200                                                                                                                  | -146     | TSGA10IP              | TSGA10IP     |
| cg13859639 | 6.64E-08 | 1.00E-05 | 5.92065  | 11  | 2846716  | Body;Body                                                                                                               | 36083    | KCNQ1                 | KCNQ1-AS1    |
| cg10077060 | 6.64E-08 | 1.00E-05 | 5.920552 | 12  | 76177845 |                                                                                                                         | 247711   |                       | PHLDA1       |
| cg01739737 | 6.65E-08 | 1.00E-05 | 5.920018 | 14  | 1.02E+08 | Body                                                                                                                    | 48324    | DYNC1H1               | DYNC1H1      |
| cg19969694 | 6.66E-08 | 1.01E-05 | 5.9197   | 15  | 41185800 | TSS1500                                                                                                                 | -847     | VPS18                 | VPS18        |
| cg17808746 | 6.67E-08 | 1.01E-05 | 5.919563 | 2   | 74571836 | TSS1500                                                                                                                 | -1293    | SLC4A5                | SLC4A5       |
| cg01567656 | 6.67E-08 | 1.01E-05 | 5.91947  | 11  | 76895869 | Body;Body;Body                                                                                                          | 56578    | MYO7A                 | MYO7A        |
| cg25966817 | 6.67E-08 | 1.01E-05 | 5.919452 | 5   | 60170058 | 3'UTR;3'UTR;3'UTR                                                                                                       | -29957   | ERCC8                 | ELOVL7       |
| cg02600349 | 6.68E-08 | 1.01E-05 | 5.91928  | 22  | 39051817 | Body;Body;TSS1500;TSS1500                                                                                               | 580      | FAM227A;CBY1          | FAM227A      |
| cg03699459 | 6.68E-08 | 1.01E-05 | 5.918999 | 10  | 4864636  | TSS5000;TSS5000;TSS5000;TSS5000;TSS5000;TSS5000                                                                         | -3732    | AKR1E2                | AKR1E2       |
| cg26456255 | 6.69E-08 | 1.01E-05 | 5.918868 | 19  | 38698718 | 3'UTR;TSS5000;TSS5000;TSS5000;TSS5000;TSS5000                                                                           | 16172    | SIPA1L3;DPF1          | DPF1         |
| cg00020419 | 6.69E-08 | 1.01E-05 | 5.918704 | 6   | 43273548 | TSS5000;TSS5000;3'UTR;3'UTR                                                                                             | 3016     | SLC22A7;CRIP3         | CRIP3        |
| cg20997656 | 6.69E-08 | 1.01E-05 | 5.918636 | 6   | 1.59E+08 | Body;Body                                                                                                               | 66982    | SYNJ2                 | SYNJ2        |
| cg20059312 | 6.70E-08 | 1.01E-05 | 5.918353 | 2   | 2.34E+08 | 5'UTR;Body                                                                                                              | 109      | NGEF;LOC101928881     | NGEF         |
| cg11902961 | 6.71E-08 | 1.01E-05 | 5.91797  | 17  | 4835341  | TSS1500                                                                                                                 | -230     | GP1BA                 | GP1BA        |
| cg22136051 | 6.71E-08 | 1.01E-05 | 5.917952 | 7   | 6192053  | Body;Body                                                                                                               | 19715    | USP42                 | CYTH3        |
| cg04441333 | 6.72E-08 | 1.01E-05 | 5.917626 | 7   | 1.58E+08 | Body;Body;Body;Body;Body                                                                                                | -134087  | PTPRN2                | LOC100506585 |
| cg03837963 | 6.73E-08 | 1.01E-05 | 5.917538 | 16  | 15666930 | Body;Body                                                                                                               | 38022    | BMERB1                | MIR6506      |
| cg04909420 | 6.75E-08 | 1.01E-05 | 5.916774 | 6   | 1.6E+08  |                                                                                                                         | -22281   | IGF2R                 | IGF2R        |
| cg05208483 | 6.75E-08 | 1.01E-05 | 5.916574 | 15  | 75975041 | Body                                                                                                                    | 30148    | CSPG4                 | CSPG4        |
| cg21377881 | 6.76E-08 | 1.01E-05 | 5.916402 | 22  | 40064566 | Body;Body                                                                                                               | 97809    | CACNA1I               | CACNA1I      |
| cg21263471 | 6.76E-08 | 1.01E-05 | 5.916366 | 17  | 56399584 | Body;Body;Body;TSS5000                                                                                                  | -3226    | TSPOAP1;TSPOAP1-AS1   | TSPOAP1-AS1  |
| cg08769634 | 6.77E-08 | 1.01E-05 | 5.91614  | 16  | 71657362 | TSS5000;TSS5000;TSS5000                                                                                                 | -2724    | MARVELD3              | MARVELD3     |
| cg16759954 | 6.77E-08 | 1.01E-05 | 5.9161   | 17  | 6461153  | TSS1500;TSS1500                                                                                                         | -1278    | PITPNM3               | PITPNM3      |
| cg08063745 | 6.77E-08 | 1.01E-05 | 5.916056 | 20  | 44690652 | TSS5000;TSS5000;3'UTR;3'UTR;3'UTR;3'UTR                                                                                 | 27949    | SLC12A5;NCOA5         | NCOA5        |
| cg11586930 | 6.77E-08 | 1.01E-05 | 5.915949 | 1   | 59314514 | Body;Body;Body                                                                                                          | 63692    | LINC01135             | LINC01135    |
| cg03072740 | 6.77E-08 | 1.01E-05 | 5.915901 | 12  | 56030437 | TSS1500                                                                                                                 | -238     | OR10P1                | OR10P1       |
| cg23023126 | 6.78E-08 | 1.02E-05 | 5.915727 | 19  | 308808   | Body;Body                                                                                                               | -17405   | MIER2                 | PLPP2        |
| cg08722720 | 6.78E-08 | 1.02E-05 | 5.915558 | 15  | 34331557 | TSS200;Body;Body                                                                                                        | -152     | AVEN;CHRM5            | AVEN         |
| cg07315051 | 6.79E-08 | 1.02E-05 | 5.915505 | 2   | 2.4E+08  | Body                                                                                                                    | 51594    | HDAC4                 | MGC16025     |
| cg11851915 | 6.79E-08 | 1.02E-05 | 5.915499 | 1   | 44060116 | Body;Body;Body;Body;Body;Body                                                                                           | -55703   | PTPRF                 | KDM4A        |
| cg14078070 | 6.79E-08 | 1.02E-05 | 5.915222 | 6   | 1.67E+08 | Body;Body;Body                                                                                                          | -10779   | RPS6KA2               | RPS6KA2      |
| cg09778734 | 6.81E-08 | 1.02E-05 | 5.914803 | 12  | 1.11E+08 | 5'UTR;Body;Body                                                                                                         | 111      | C12orf76              | C12orf76     |
| cg00488734 | 6.81E-08 | 1.02E-05 | 5.914575 | 16  | 58076165 | Body                                                                                                                    | 16508    | MMP15                 | MMP15        |
| cg26588612 | 6.81E-08 | 1.02E-05 | 5.914497 | 6   | 1.49E+08 |                                                                                                                         | -31126   |                       | SASH1        |
| cg01548249 | 6.82E-08 | 1.02E-05 | 5.914477 | 19  | 7582188  | Body                                                                                                                    | 1200     | ZNF358                | ZNF358       |
| cg24844387 | 6.82E-08 | 1.02E-05 | 5.914404 | 6   | 20215399 | TSS5000;TSS5000                                                                                                         | -2699    | MBOAT1                | MBOAT1       |
| cg00976532 | 6.82E-08 | 1.02E-05 | 5.914322 | 16  | 2636476  | Body;Body;Body                                                                                                          | -16908   | PDPK1                 | LOC652276    |
| cg23065576 | 6.83E-08 | 1.02E-05 | 5.913812 | 20  | 25207247 | 3'UTR;3'UTR;3'UTR;3'UTR;3'UTR;3'UTR;3'UTR;3'UTR;3'UTR;3'UTR;3'UTR;3'UTR;3'UTR;3'UTR;3'UTR;3'UTR;3'UTR;3'UTR;3'UTR;3'UTR | -21473   | ENTPD6                | PYGB         |
| cg27228272 | 6.84E-08 | 1.02E-05 | 5.913785 | 2   | 1.28E+08 |                                                                                                                         | 67303    |                       | BIN1         |
| cg18234542 | 6.84E-08 | 1.02E-05 | 5.913661 | 14  | 78553121 |                                                                                                                         | -83594   |                       | NRXN3        |

| Probe      | p_adj    | q_val    | t        | Chr | Pos.hg19 | locations                                                           | dist2TSS | gene.Illumina         | gene.nearest |
|------------|----------|----------|----------|-----|----------|---------------------------------------------------------------------|----------|-----------------------|--------------|
| cg02701826 | 6.84E-08 | 1.02E-05 | 5.913638 | 19  | 15903794 | TSS1500                                                             | -1064    | OR10H5                | OR10H5       |
| cg21550098 | 6.84E-08 | 1.02E-05 | 5.913522 | 4   | 1.66E+08 | TSS1500                                                             | -1476    | TRIM61                | TRIM61       |
| cg21558893 | 6.85E-08 | 1.02E-05 | 5.913399 | 15  | 75950332 | 3'UTR;3'UTR                                                         | 8985     | SNX33                 | SNX33        |
| cg07126979 | 6.85E-08 | 1.02E-05 | 5.913344 | 3   | 1.27E+08 | Body                                                                | 10852    | PODXL2                | PODXL2       |
| cg17433546 | 6.86E-08 | 1.02E-05 | 5.912904 | 12  | 1.07E+08 | Body;Body;Body;Body;Body;Body                                       | 2239     | TMEM263               | TMEM263      |
| cg20424065 | 6.87E-08 | 1.02E-05 | 5.912508 | 6   | 1.52E+08 | Body;Body;Body                                                      | 10517    | AKAP12                | AKAP12       |
| cg08193821 | 6.89E-08 | 1.03E-05 | 5.911856 | 6   | 5412087  | Body;Body                                                           | 46221    | FARS2                 | LOC101927972 |
| cg23369632 | 6.90E-08 | 1.03E-05 | 5.911773 | 6   | 56438637 | Body;Body;Body;Body                                                 | 69050    | DST                   | DST          |
| cg20413432 | 6.91E-08 | 1.03E-05 | 5.911393 | 17  | 45892150 | Body                                                                | 7010     | OSBPL7                | OSBPL7       |
| cg05452618 | 6.92E-08 | 1.03E-05 | 5.910945 | 5   | 1271848  | Body;Body;Body;Body                                                 | 23335    | TERT                  | TERT         |
| cg08087047 | 6.93E-08 | 1.03E-05 | 5.910642 | 17  | 72461209 | TSS1500;TSS5000;TSS5000;TSS5000                                     | -1302    | CD300A                | CD300A       |
| cg26145461 | 6.94E-08 | 1.03E-05 | 5.910263 | 6   | 2510637  |                                                                     | -124096  | LINC02521             | LINC02521    |
| cg04772457 | 6.95E-08 | 1.03E-05 | 5.910093 | 20  | 61822507 | TSS5000                                                             | 12656    | YTHDF1                | MIR124-3     |
| cg06632797 | 6.95E-08 | 1.03E-05 | 5.909877 | 11  | 68968215 |                                                                     | -29185   |                       | LOC338694    |
| cg21484910 | 6.95E-08 | 1.03E-05 | 5.909873 | 2   | 40097661 |                                                                     | -47112   |                       | SLC8A1-AS1   |
| cg04357398 | 6.96E-08 | 1.03E-05 | 5.909476 | 6   | 32365960 | Body;TSS5000;Body                                                   | 7674     | TSBP1-AS1;HCG23;BTNL2 | HCG23        |
| cg05211790 | 6.96E-08 | 1.03E-05 | 5.909459 | 5   | 34683189 | Body;Body;Body;TSS1500;TSS1500;TSS5000                              | -1422    | RAI14                 | RAI14        |
| cg17013888 | 6.97E-08 | 1.03E-05 | 5.909151 | 2   | 1.53E+08 | Body                                                                | 2826     | FMNL2                 | FMNL2        |
| cg09414264 | 6.98E-08 | 1.03E-05 | 5.908947 | 11  | 3113709  | Body;Body;Body                                                      | -35056   | OSBPL5                | CARS1        |
| cg06143346 | 6.98E-08 | 1.03E-05 | 5.908816 | 3   | 62320945 | 3'UTR;3'UTR;3'UTR                                                   | 16249    | C3orf14               | C3orf14      |
| cg01800500 | 7.00E-08 | 1.04E-05 | 5.908196 | 14  | 95417572 |                                                                     | 180594   |                       | GSC-DT       |
| cg11845785 | 7.01E-08 | 1.04E-05 | 5.907998 | 2   | 1.05E+08 | Body;Body                                                           | 8420     | LINC01102;LINC01103   | LINC01103    |
| cg19732653 | 7.01E-08 | 1.04E-05 | 5.907958 | 1   | 2.46E+08 | Body                                                                | -450979  | KIF26B                | KIF26B-AS1   |
| cg24951140 | 7.01E-08 | 1.04E-05 | 5.907938 | 8   | 29156846 |                                                                     | -36259   |                       | KIF13B       |
| cg26651810 | 7.03E-08 | 1.04E-05 | 5.907325 | 16  | 53851122 | Body;Body;Body;Body;Body;Body;Body;Body;Body;Body;Body;Body         | 113055   | FTO                   | FTO          |
| cg25987842 | 7.03E-08 | 1.04E-05 | 5.907282 | 17  | 21326491 | TSS5000                                                             | 46823    | KCNJ12                | KCNJ12       |
| cg18994049 | 7.05E-08 | 1.04E-05 | 5.90674  | 11  | 69813825 |                                                                     | 96205    |                       | LINC02753    |
| cg13373361 | 7.07E-08 | 1.04E-05 | 5.905985 | 7   | 98885594 | Body                                                                | 14671    | MYH16                 | MYH16        |
| cg17074213 | 7.07E-08 | 1.04E-05 | 5.905883 | 1   | 92351695 | 5'UTR;5'UTR;Body;Body                                               | 13       | TGFBR3                | TGFBR3       |
| cg25026926 | 7.08E-08 | 1.04E-05 | 5.905724 | 17  | 48266268 | Body                                                                | 12732    | COL1A1                | COL1A1       |
| cg09031013 | 7.09E-08 | 1.05E-05 | 5.905264 | 21  | 35835170 | TSS5000;TSS5000;Body;Body;Body;TSS5000;Body                         | -2934    | KCNE1                 | KCNE1        |
| cg21759500 | 7.11E-08 | 1.05E-05 | 5.904601 | 3   | 1.08E+08 | Body                                                                | 58074    | MYH15                 | MYH15        |
| cg19677739 | 7.11E-08 | 1.05E-05 | 5.904516 | 1   | 1.61E+08 | TSS5000;TSS5000;Body;TSS5000                                        | 2692     | NDUFS2;FCER1G;APOA2   | FCER1G       |
| cg22822219 | 7.12E-08 | 1.05E-05 | 5.904388 | 14  | 24105017 | Body;TSS1500;TSS1500                                                | -555     | DHRS2                 | DHRS2        |
| cg11145643 | 7.13E-08 | 1.05E-05 | 5.903997 | 14  | 1.01E+08 | Body;Body;Body;Body;TSS5000;TSS5000;TSS5000;TSS5000;TSS5000;TSS5000 | 1866     | WARS1;WDR25           | WARS1        |
| cg14578500 | 7.14E-08 | 1.05E-05 | 5.903789 | 17  | 43191793 | Body;Body                                                           | 8        | PLCD3;MIR6784         | MIR6784      |
| cg02577092 | 7.14E-08 | 1.05E-05 | 5.903718 | 5   | 73778483 | Body                                                                | 54318    | LINC01331             | LINC01331    |
| cg04421632 | 7.14E-08 | 1.05E-05 | 5.903638 | 19  | 15618618 | TSS1500                                                             | -717     | CYP4F22               | CYP4F22      |
| cg21299491 | 7.14E-08 | 1.05E-05 | 5.903499 | 1   | 3057366  | Body;Body                                                           | 12828    | PRDM16                | MIR4251      |
| cg18522038 | 7.16E-08 | 1.05E-05 | 5.903064 | 17  | 30568596 |                                                                     | -24254   |                       | RHBDL3       |
| cg23230478 | 7.16E-08 | 1.05E-05 | 5.90304  | 1   | 6360620  | Body;Body;Body;Body                                                 | -39462   | ACOT7                 | GPR153       |
| cg00292947 | 7.16E-08 | 1.05E-05 | 5.902852 | 15  | 78499137 | Body;Body                                                           | 27770    | ACSBG1                | ACSBG1       |
| cg06668976 | 7.17E-08 | 1.05E-05 | 5.902733 | 5   | 1.71E+08 |                                                                     | -83184   |                       | SMIM23       |
| cg02800747 | 7.17E-08 | 1.05E-05 | 5.902542 | 17  | 77047094 | TSS5000;TSS5000;TSS5000;TSS5000;TSS5000                             | 16714    | C1QTNF1               | C1QTNF1      |
| cg10948036 | 7.19E-08 | 1.06E-05 | 5.902005 | 10  | 1.35E+08 | Body;Body                                                           | 11128    | ADGRA1                | ADGRA1       |
| cg09123026 | 7.19E-08 | 1.06E-05 | 5.901868 | 17  | 74480528 | Body;Body                                                           | 3463     | RHBDF2                | RHBDF2       |
| cg05269713 | 7.21E-08 | 1.06E-05 | 5.901375 | 17  | 48353633 | Body;Body                                                           | 1807     | TMEM92                | TMEM92       |
| cg00227651 | 7.21E-08 | 1.06E-05 | 5.901328 | 12  | 1.28E+08 |                                                                     | -55705   |                       | LINC02393    |
| cg04791129 | 7.22E-08 | 1.06E-05 | 5.900967 | 12  | 53490632 | TSS1500                                                             | -818     | IGFBP6                | IGFBP6       |
| cg14351526 | 7.23E-08 | 1.06E-05 | 5.900629 | 6   | 72086737 | TSS200                                                              | -3       | MIR30C2               | MIR30C2      |
| cg10165842 | 7.23E-08 | 1.06E-05 | 5.90061  | 11  | 1155095  | Body                                                                | 3516     | MUC5AC                | MUC5AC       |
| cg01773858 | 7.26E-08 | 1.06E-05 | 5.899776 | 11  | 73076892 | Body                                                                | -10551   | ARHGEF17              | REL          |
| cg14790552 | 7.27E-08 | 1.07E-05 | 5.899443 | 6   | 30866999 | Body;Body;Body;Body;Body;Body;Body;3'UTR;Body                       | 8340     | DDR1                  | MIR4640      |
| cg05016066 | 7.27E-08 | 1.07E-05 | 5.899403 | 16  | 66377143 |                                                                     | -23450   |                       | CDH5         |
| cg12036817 | 7.28E-08 | 1.07E-05 | 5.899135 | 11  | 405846   | TSS5000;TSS5000;3'UTR;3'UTR;3'UTR                                   | 9153     | PKP3;SIGIRR           | SIGIRR       |
| cg17527348 | 7.28E-08 | 1.07E-05 | 5.899127 | 22  | 22285359 | Body                                                                | -7249    | PPM1F                 | PPM1F-AS1    |
| cg09596025 | 7.28E-08 | 1.07E-05 | 5.899037 | 16  | 84090260 | Body                                                                | -14498   | MBTPS1                | SLC38A8      |
| cg16263801 | 7.30E-08 | 1.07E-05 | 5.898592 | 11  | 2444866  | TSS1500                                                             | -591     | TRPM5                 | TRPM5        |
| cg13487183 | 7.31E-08 | 1.07E-05 | 5.89815  | 13  | 78428203 | Body                                                                | 35132    | EDNRB-AS1             | EDNRB-AS1    |
| cg08834602 | 7.31E-08 | 1.07E-05 | 5.898041 | 19  | 44220122 | TSS200                                                              | -105     | IRGC                  | IRGC         |

| Probe      | p_adj    | q_val    | t        | Chr | Pos.hg19 | locations                                                                       | dist2TSS | gene.Illumina                             | gene.nearest |
|------------|----------|----------|----------|-----|----------|---------------------------------------------------------------------------------|----------|-------------------------------------------|--------------|
| cg08028035 | 7.32E-08 | 1.07E-05 | 5.897807 | 3   | 42252958 | Body;Body;3'UTR;Body;Body;Body;3'UTR;Body;Body;3'UTR                            | 51274    | TRAK1                                     | TRAK1        |
| cg10041069 | 7.32E-08 | 1.07E-05 | 5.897798 | 10  | 1560628  | Body                                                                            | -8196    | ADARB2                                    | ADARB2-AS1   |
| cg15068428 | 7.32E-08 | 1.07E-05 | 5.897743 | 11  | 6473744  | Body;Body;Body;Body                                                             | -11527   | TRIM3                                     | HPX          |
| cg11161150 | 7.33E-08 | 1.07E-05 | 5.89767  | 5   | 98119892 | Body;Body;Body;Body;Body                                                        | 10526    | RGM3                                      | RGM3         |
| cg05880452 | 7.33E-08 | 1.07E-05 | 5.897621 | 2   | 1.53E+08 | TSS1500                                                                         | -656     | FMNL2                                     | FMNL2        |
| cg07751803 | 7.34E-08 | 1.07E-05 | 5.897137 | 19  | 47258810 | 1stExon;1stExon                                                                 | -9103    | FKRP                                      | STRN4        |
| cg01628245 | 7.35E-08 | 1.07E-05 | 5.896997 | 2   | 97464763 | Body;TESS000                                                                    | 749      | CNNM4;MIR3127                             | MIR3127      |
| cg12255062 | 7.35E-08 | 1.07E-05 | 5.896869 | 6   | 32138332 | TESS000;TESS000;TESS000;Body;Body;Body;Body;Body;TSS1500                        | -439     | PPT2-EGFL8;EGFL8;AGPAT1;MIR6721           | MIR6721      |
| cg21452808 | 7.35E-08 | 1.07E-05 | 5.896769 | 1   | 25900135 | TESS000                                                                         | 30039    | LDLRAP1                                   | LDLRAP1      |
| cg09741713 | 7.36E-08 | 1.07E-05 | 5.896675 | 12  | 62471915 | Body                                                                            | 114705   | TAF2                                      | TAF2         |
| cg10855945 | 7.36E-08 | 1.07E-05 | 5.896621 | 6   | 1.66E+08 | Body;Body                                                                       | -28811   | PDE10A                                    | C6orf118     |
| cg21546868 | 7.36E-08 | 1.07E-05 | 5.896607 | 14  | 1.06E+08 | TESS000;TESS000                                                                 | 13215    | JAG2                                      | MIR6765      |
| cg11340785 | 7.37E-08 | 1.07E-05 | 5.896261 | 5   | 61374735 | Body                                                                            | -227253  | KIF2A                                     | KIF2A        |
| cg02647493 | 7.37E-08 | 1.07E-05 | 5.89615  | 6   | 32019042 | Body;Body                                                                       | -5137    | TNXB                                      | TNXB         |
| cg07993372 | 7.39E-08 | 1.07E-05 | 5.89568  | 16  | 427084   | Body                                                                            | 4894     | PGAP6                                     | PGAP6        |
| cg13002506 | 7.40E-08 | 1.08E-05 | 5.895459 | 11  | 76998821 | Body                                                                            | 13890    | GDPD4                                     | GDPD4        |
| cg04576048 | 7.41E-08 | 1.08E-05 | 5.895023 | 1   | 2.06E+08 | 3'UTR;Body                                                                      | -15267   | PM20D1                                    | SLC41A1      |
| cg09841666 | 7.41E-08 | 1.08E-05 | 5.894957 | 20  | 58478713 | Body                                                                            | 29979    | SYCP2                                     | SYCP2        |
| cg15507787 | 7.41E-08 | 1.08E-05 | 5.894877 | 10  | 93802554 | TESS000;TESS000                                                                 | 119028   | CPEB3                                     | BTA1         |
| cg04103326 | 7.42E-08 | 1.08E-05 | 5.89474  | 6   | 34489623 | Body;Body                                                                       | 6975     | PACIN1                                    | PACIN1       |
| cg21655267 | 7.43E-08 | 1.08E-05 | 5.894406 | 2   | 1.29E+08 | Body                                                                            | -7028    | HOXB9                                     | HS6ST1       |
| cg07048527 | 7.43E-08 | 1.08E-05 | 5.894278 | 17  | 46700449 | Body                                                                            | 3271     | HOXB9                                     | HOXB9        |
| cg00703885 | 7.44E-08 | 1.08E-05 | 5.894014 | 2   | 1.28E+08 | TSS1500                                                                         | -887     | LIMS2                                     | LIMS2        |
| cg26879644 | 7.44E-08 | 1.08E-05 | 5.89399  | 15  | 92238013 | Body                                                                            | -158924  | SLC3A1                                    | SLC3A1       |
| cg13296093 | 7.44E-08 | 1.08E-05 | 5.893917 | 6   | 31868740 | TSS5000;TSS5000;TSS5000;TSS5000;TSS5000;Body;Body;TSS200                        | -35      | EHMT2;C2;ZBTB12                           | C2           |
| cg11931798 | 7.45E-08 | 1.08E-05 | 5.8937   | 12  | 20246350 | Body                                                                            | 34485    | LINC02398                                 | LINC02468    |
| cg12870830 | 7.46E-08 | 1.08E-05 | 5.893407 | 11  | 1.19E+08 | Body;TSS5000;Body                                                               | 2078     | MFRP;C1QTNF5                              | MFRP         |
| cg16896008 | 7.47E-08 | 1.08E-05 | 5.893249 | 6   | 24206177 | Body;Body                                                                       | 79735    | DCDC2                                     | NRSN1        |
| cg13263323 | 7.48E-08 | 1.08E-05 | 5.892772 | 15  | 86062960 | Body;Body                                                                       | -100220  | AKAP13                                    | AKAP13       |
| cg08204369 | 7.49E-08 | 1.08E-05 | 5.892619 | 17  | 73150733 | TSS1500;TSS1500;TSS200;TSS200;TSS200;TSS200                                     | -126     | JPT1                                      | JPT1         |
| cg12303582 | 7.49E-08 | 1.08E-05 | 5.89237  | 10  | 3169516  | Body;Body;Body;Body;Body;Body;Body;Body;Body                                    | -6779    | PFKP                                      | SNORD142     |
| cg07730159 | 7.50E-08 | 1.09E-05 | 5.892212 | 12  | 29299659 | TSS5000                                                                         | -2551    | FAR2                                      | FAR2         |
| cg13193392 | 7.51E-08 | 1.09E-05 | 5.891915 | 13  | 60055857 | Body                                                                            | -530994  | DIAPH3-AS1                                | DIAPH3-AS1   |
| cg10276116 | 7.51E-08 | 1.09E-05 | 5.891899 | 6   | 1.55E+08 | Body;Body;Body;Body                                                             | 116095   | OPRM1;IPCEF1                              | IPCEF1       |
| cg12103547 | 7.51E-08 | 1.09E-05 | 5.891862 | 6   | 1.69E+08 | Body;Body                                                                       | 209093   | SMOC2                                     | SMOC2        |
| cg27410165 | 7.51E-08 | 1.09E-05 | 5.891751 | 11  | 18978169 | Body                                                                            | -21620   | MRGPRX1                                   | MRGPRX1      |
| cg00066828 | 7.52E-08 | 1.09E-05 | 5.891552 | 17  | 1837612  | TESS000                                                                         | -83397   | RTN4RL1                                   | LOC105371485 |
| cg16929041 | 7.52E-08 | 1.09E-05 | 5.891537 | 17  | 26648951 | Body                                                                            | 2726     | TMEM97                                    | TMEM97       |
| cg16899036 | 7.52E-08 | 1.09E-05 | 5.89147  | 19  | 19052705 | TSS5000;TSS5000;TSS5000;TSS5000;TSS1500;Body;Body                               | -679     | HOMER3;HOMER3-AS1                         | HOMER3       |
| cg23034420 | 7.54E-08 | 1.09E-05 | 5.89103  | 21  | 43434317 | TSS5000;TSS5000;TSS5000;TSS5000;TSS5000;Body                                    | -3848    | ZBTB21;ZNF295-AS1                         | ZBTB21       |
| cg22274234 | 7.55E-08 | 1.09E-05 | 5.890713 | 12  | 1.1E+08  | TESS000;3'UTR;3'UTR;3'UTR;Body;Body                                             | 26247    | MYO1H;KCTD10                              | KCTD10       |
| cg14723566 | 7.55E-08 | 1.09E-05 | 5.890607 | 15  | 80711027 | Body                                                                            | 14304    | ARNT2                                     | ARNT2        |
| cg18152154 | 7.57E-08 | 1.09E-05 | 5.88995  | 1   | 46639632 | Body;Body;TSS1500;TESS000                                                       | 941      | PIK3R3;LOC110117498-PIK3R3;TSPAN1;P3R3URF | PIK3R3       |
| cg14252164 | 7.57E-08 | 1.09E-05 | 5.889943 | 6   | 44019598 | Body                                                                            | 22791    | LOC101929705                              | LOC101929705 |
| cg11767711 | 7.59E-08 | 1.09E-05 | 5.889292 | 19  | 36358783 | TESS000;TESS000;TESS000;TESS000;TESS000;TSS1500;TSS1500                         | -563     | KIRREL2;APLP1                             | APLP1        |
| cg00359511 | 7.60E-08 | 1.09E-05 | 5.88919  | 16  | 28509413 | Body;TESS000                                                                    | 3450     | APOBR;IL27                                | APOBR        |
| cg02202315 | 7.60E-08 | 1.09E-05 | 5.889015 | 2   | 98357867 | TESS000;TESS000                                                                 | 6999     | ZAP70                                     | ZAP70        |
| cg03766174 | 7.62E-08 | 1.10E-05 | 5.888418 | 16  | 81547907 | Body;Body                                                                       | 18949    | CMIP                                      | CMIP         |
| cg08686879 | 7.63E-08 | 1.10E-05 | 5.888305 | 5   | 1.31E+08 | 1stExon                                                                         | 153      | CSF2                                      | CSF2         |
| cg04851348 | 7.63E-08 | 1.10E-05 | 5.888156 | 1   | 1.63E+08 | Body                                                                            | 12490    | CCDC190                                   | CCDC190      |
| cg02504734 | 7.63E-08 | 1.10E-05 | 5.888137 | 16  | 70955865 | Body                                                                            | -120804  | HYDIN                                     | VAC14        |
| cg09855212 | 7.63E-08 | 1.10E-05 | 5.888042 | 11  | 85427572 | Body;Body;Body;Body;Body;Body;Body;Body;Body;Body;Body;Body;Body;Body;Body;Body | 2565     | SYTL2                                     | SYTL2        |
| cg24987745 | 7.64E-08 | 1.10E-05 | 5.888002 | 2   | 17819167 | Body;Body;Body;Body;Body                                                        | 97205    | VSNL1                                     | VSNL1        |
| cg09037726 | 7.64E-08 | 1.10E-05 | 5.887973 | 4   | 76995173 | Body;TSS1500;TSS1500                                                            | -674     | ART3                                      | ART3         |
| cg20356136 | 7.64E-08 | 1.10E-05 | 5.887862 | 4   | 7802238  | Body;Body;Body;Body                                                             | 46422    | AFAP1                                     | AFAP1-AS1    |
| cg00955867 | 7.64E-08 | 1.10E-05 | 5.887738 | 1   | 1.6E+08  | 5'UTR                                                                           | 178      | NHLH1                                     | NHLH1        |
| cg09232918 | 7.65E-08 | 1.10E-05 | 5.887683 | 16  | 53120404 | Body                                                                            | 31502    | CHD9                                      | CHD9         |
| cg23046566 | 7.65E-08 | 1.10E-05 | 5.887591 | 6   | 1.7E+08  | Body                                                                            | -76836   | LOC102724511                              | LOC102724511 |





| Probe      | p_adj    | q_val    | t        | Chr | Pos.hg19 | locations                                                                              | dist2TSS | gene.Illumina           | gene.nearest |
|------------|----------|----------|----------|-----|----------|----------------------------------------------------------------------------------------|----------|-------------------------|--------------|
| cg10333415 | 8.38E-08 | 1.16E-05 | 5.866294 | 3   | 1.95E+08 | Body;Body                                                                              | 34147    | XXYL1                   | XXYL1        |
| cg24522478 | 8.39E-08 | 1.16E-05 | 5.866008 | 11  | 2177498  | Body;Body;TESS000;TESS000;TESS000;TESS000                                              | 4941     | INS-IGF2;INS            | INS-IGF2     |
| cg16362014 | 8.39E-08 | 1.16E-05 | 5.865967 | 5   | 1.18E+08 | Body;Body                                                                              | 2359     | DTWD2                   | DTWD2        |
| cg11582558 | 8.39E-08 | 1.16E-05 | 5.865958 | 8   | 1.02E+08 | TESS1500;TESS1500;TESS1500;TESS1500                                                    | -782     | ANKRD46                 | ANKRD46      |
| cg26535547 | 8.40E-08 | 1.16E-05 | 5.865877 | 17  | 42151680 | Body;Body;Body;Body;TESS000;TESS000                                                    | 3402     | G6PC3;HDAC5             | G6PC3        |
| cg14358492 | 8.40E-08 | 1.16E-05 | 5.865811 | 9   | 91454488 |                                                                                        | -93668   | MIR4289                 | MIR4289      |
| cg08970020 | 8.40E-08 | 1.16E-05 | 5.865772 | 2   | 64216731 | Body;Body                                                                              | 29831    | VP54                    | VP54         |
| cg06581825 | 8.40E-08 | 1.16E-05 | 5.865704 | 2   | 1.63E+08 | Body;Body;Body;Body;Body;Body;Body;Body;Body;Body;Body;Body;Body;Body;Body;Body        | 92361    | SLC4A10                 | DPP4         |
| cg14230719 | 8.41E-08 | 1.16E-05 | 5.865482 | 9   | 1.23E+08 |                                                                                        | -15541   | MEGF9                   | MEGF9        |
| cg02299946 | 8.42E-08 | 1.16E-05 | 5.865289 | 10  | 1.24E+08 | Body                                                                                   | 3402     | HTRA1                   | HTRA1        |
| cg07464250 | 8.42E-08 | 1.16E-05 | 5.865235 | 5   | 1.19E+08 | TESS000;TESS000;TESS000;TESS000;TESS000                                                | 46668    | TNFAIP8                 | TNFAIP8      |
| cg23293467 | 8.42E-08 | 1.16E-05 | 5.865165 | 8   | 6762877  |                                                                                        | 20721    |                         | DEFA6        |
| cg23833425 | 8.43E-08 | 1.16E-05 | 5.865049 | 6   | 1.42E+08 | Body;Body;Body                                                                         | 8241     | VTA1                    | VTA1         |
| cg08955099 | 8.43E-08 | 1.16E-05 | 5.865049 | 2   | 2.13E+08 | Body;Body                                                                              | 395111   | ERBB4                   | MIR548F2     |
| cg00910616 | 8.43E-08 | 1.16E-05 | 5.865009 | 1   | 41245733 | TESS000;TESS000                                                                        | -3725    | KCNQ4                   | KCNQ4        |
| cg11229160 | 8.44E-08 | 1.16E-05 | 5.864729 | 6   | 5510800  | Body;Body                                                                              | -52492   | FARS2                   | LOC101927972 |
| cg27543823 | 8.44E-08 | 1.16E-05 | 5.864675 | 16  | 63650892 |                                                                                        | 1505074  |                         | CDH11        |
| cg25384949 | 8.45E-08 | 1.16E-05 | 5.864254 | 6   | 32190320 | Body;Body;Body                                                                         | 1524     | NOTCH4                  | NOTCH4       |
| cg02249030 | 8.46E-08 | 1.16E-05 | 5.864219 | 6   | 99961954 | 5'UTR;5'UTR;Body;Body;Body;Body;Body;Body;Body;Body;Body;Body;Body;Body;Body;Body;Body | 1298     | USP45                   | USP45        |
| cg22550943 | 8.46E-08 | 1.16E-05 | 5.864157 | 7   | 2122577  | Body;Body;Body;Body;Body                                                               | 6110     | MAD1L1                  | SNORA114     |
| cg21033494 | 8.47E-08 | 1.16E-05 | 5.863886 | 10  | 51550114 | Body;Body                                                                              | 562      | MSMB                    | MSMB         |
| cg21784143 | 8.47E-08 | 1.16E-05 | 5.863882 | 17  | 20460588 |                                                                                        | -22448   | CDRT15L2                | CDRT15L2     |
| cg00917181 | 8.47E-08 | 1.16E-05 | 5.863821 | 17  | 76925901 | TESS000                                                                                | -4432    | TIMP2                   | TIMP2        |
| cg23271998 | 8.48E-08 | 1.16E-05 | 5.86366  | 2   | 3260576  | Body;Body;Body                                                                         | 121013   | EIPR1                   | EIPR1        |
| cg19802542 | 8.48E-08 | 1.16E-05 | 5.863561 | 3   | 46786238 | Body                                                                                   | 7        | PRSS45P                 | PRSS45P      |
| cg20256567 | 8.48E-08 | 1.16E-05 | 5.863522 | 10  | 1.27E+08 | Body;Body;Body;Body;Body;Body;Body                                                     | 31705    | CTBP2                   | CTBP2        |
| cg14962616 | 8.49E-08 | 1.16E-05 | 5.863396 | 19  | 39437613 | Body;Body;Body                                                                         | 5714     | FBXO17                  | FBXO17       |
| cg23639734 | 8.49E-08 | 1.16E-05 | 5.863273 | 4   | 24796753 | TESS1500                                                                               | -441     | SOD3                    | SOD3         |
| cg13401014 | 8.50E-08 | 1.16E-05 | 5.863067 | 11  | 1.29E+08 | TESS000;Body;TESS000;TESS000;TESS000;TESS000                                           | -2427    | LOC101929538;FLI1;SENCR | LOC101929538 |
| cg03709271 | 8.50E-08 | 1.16E-05 | 5.862996 | 10  | 1.35E+08 |                                                                                        | 40625    |                         | LINC01168    |
| cg22188571 | 8.51E-08 | 1.17E-05 | 5.862608 | 6   | 34074955 | TESS1500;Body;Body;Body;Body                                                           | -1211    | GRM4                    | GRM4         |
| cg08104780 | 8.52E-08 | 1.17E-05 | 5.862562 | 16  | 2848117  | TESS000;TESS1500                                                                       | -353     | SNORA3C;PRSS41          | PRSS41       |
| cg27492725 | 8.52E-08 | 1.17E-05 | 5.862517 | 2   | 1.83E+08 |                                                                                        | -21899   |                         | PDE1A        |
| cg00069014 | 8.53E-08 | 1.17E-05 | 5.862256 | 1   | 14156840 |                                                                                        | 80931    |                         | PRDM2        |
| cg05824594 | 8.54E-08 | 1.17E-05 | 5.86177  | 12  | 2734503  | Body;Body;Body;Body;Body;Body;Body;Body;Body;Body;Body;Body;Body;Body;Body;Body        | 46883    | CACNA1C                 | CACNA1C-AS2  |
| cg06909503 | 8.56E-08 | 1.17E-05 | 5.8614   | 1   | 1.65E+08 | Body;Body;Body;Body;Body                                                               | 18651    | PBX1                    | PBX1-AS1     |
| cg25140751 | 8.56E-08 | 1.17E-05 | 5.861335 | 15  | 78419875 | Body;Body;Body;Body;Body                                                               | 3912     | CIB2                    | CIB2         |
| cg07198170 | 8.57E-08 | 1.17E-05 | 5.861147 | 7   | 1581217  | 3'UTR;TESS000                                                                          | -6701    | MAFK;TMEM184A           | LOC100128653 |
| cg20039983 | 8.57E-08 | 1.17E-05 | 5.861101 | 14  | 23516460 | TESS000;3'UTR;3'UTR                                                                    | 5040     | PSMB11;CDH24            | PSMB11       |
| cg26500457 | 8.57E-08 | 1.17E-05 | 5.860978 | 11  | 1.23E+08 | Body;5'UTR                                                                             | 42       | CRTAM                   | CRTAM        |
| cg18220380 | 8.57E-08 | 1.17E-05 | 5.86097  | 8   | 1.42E+08 | Body;Body;Body;Body                                                                    | 46760    | DENND3                  | DENND3       |
| cg09155692 | 8.58E-08 | 1.17E-05 | 5.860815 | 4   | 1.85E+08 | Body                                                                                   | 4078     | STOX2                   | STOX2        |
| cg03680528 | 8.58E-08 | 1.17E-05 | 5.860811 | 18  | 72999716 | 1stExon;Body                                                                           | 76233    | TSHZ1                   | TSHZ1        |
| cg13034825 | 8.58E-08 | 1.17E-05 | 5.860679 | 3   | 1.5E+08  |                                                                                        | -16632   | SLAH2                   | SLAH2        |
| cg22659852 | 8.59E-08 | 1.17E-05 | 5.860559 | 6   | 1.52E+08 | Body;Body;Body;Body                                                                    | 24602    | SYNE1                   | SYNE1        |
| cg20934731 | 8.59E-08 | 1.17E-05 | 5.860548 | 8   | 4439787  | Body                                                                                   | 412649   | CSMD1                   | CSMD1        |
| cg11387897 | 8.60E-08 | 1.17E-05 | 5.860337 | 1   | 1.84E+08 | Body;Body;Body                                                                         | 92674    | COLGALT2                | COLGALT2     |
| cg22489883 | 8.60E-08 | 1.17E-05 | 5.860203 | 1   | 2537547  | Body                                                                                   | 19332    | MMEL1                   | PRXL2B       |
| cg00401797 | 8.61E-08 | 1.17E-05 | 5.859925 | 1   | 3315193  | Body;Body                                                                              | -56035   | PRDM16                  | ARHGEF16     |
| cg04944931 | 8.63E-08 | 1.18E-05 | 5.85941  | 10  | 76996462 | TESS1500                                                                               | -747     | COMTD1                  | COMTD1       |
| cg13063207 | 8.63E-08 | 1.18E-05 | 5.859348 | 8   | 1442292  | Body                                                                                   | 127538   | DLGAP2                  | DLGAP2-AS1   |
| cg21440339 | 8.64E-08 | 1.18E-05 | 5.859213 | 2   | 2.01E+08 | TESS000;TESS000;TESS000;TESS000                                                        | -3895    | KCTD18                  | KCTD18       |
| cg03405834 | 8.64E-08 | 1.18E-05 | 5.859191 | 16  | 677895   | 3'UTR;3'UTR;3'UTR;3'UTR;3'UTR;TESS000                                                  | -3089    | RAB40C;WFIKKN1          | WFIKKN1      |
| cg03760226 | 8.65E-08 | 1.18E-05 | 5.859012 | 1   | 1390794  | Body                                                                                   | 5726     | ATAD3C                  | ATAD3C       |
| cg13429270 | 8.65E-08 | 1.18E-05 | 5.858855 | 18  | 10727599 | Body                                                                                   | 32048    | PIEZO2                  | MIR6788      |
| cg00355377 | 8.67E-08 | 1.18E-05 | 5.858485 | 10  | 50336460 | Body;TESS000                                                                           | 5605     | FAM170B-AS1;FAM170B     | FAM170B      |
| cg14898646 | 8.67E-08 | 1.18E-05 | 5.858385 | 7   | 820298   | Body;Body                                                                              | -34895   | DNAF5                   | SUN1         |
| cg12407978 | 8.67E-08 | 1.18E-05 | 5.858385 | 11  | 10590159 | Body;Body;Body;Body;5'UTR;TESS000;TESS000;TESS000;TESS000;TESS000                      | 53       | MRV1-AS1;LYVE1;MRV1     | LYVE1        |
| cg02049938 | 8.68E-08 | 1.18E-05 | 5.85809  | 8   | 21994573 | TESS000;TESS000;TESS000                                                                | 4847     | REEP4                   | REEP4        |

| Probe      | p_adj    | q_val    | t        | Chr | Pos.hg19 | locations                                                                             | dist2TSS | gene.Illumina                                          | gene.nearest |
|------------|----------|----------|----------|-----|----------|---------------------------------------------------------------------------------------|----------|--------------------------------------------------------|--------------|
| cg23239637 | 8.68E-08 | 1.18E-05 | 5.85804  | 2   | 1507832  | Body;Body;Body;Body;Body;Body                                                         | 89653    | TPO                                                    | TPO          |
| cg14487577 | 8.69E-08 | 1.18E-05 | 5.857951 | 6   | 52012390 | TSS5000;Body;TSS1500                                                                  | -1330    | MIR206;LINCM1;MIR133B                                  | MIR133B      |
| cg22463035 | 8.69E-08 | 1.18E-05 | 5.857785 | 12  | 1.31E+08 | Body;Body;Body;Body;Body                                                              | 12839    | RIMBP2                                                 | RIMBP2       |
| cg05141924 | 8.70E-08 | 1.18E-05 | 5.857589 | 2   | 28669866 |                                                                                       | -49060   |                                                        | PLB1         |
| cg26639479 | 8.70E-08 | 1.18E-05 | 5.857496 | 16  | 30363681 | 3'UTR;3'UTR;TSS5000                                                                   | 2574     | CD2BP2;TBC1D10B                                        | CD2BP2       |
| cg21640603 | 8.71E-08 | 1.18E-05 | 5.857425 | 19  | 11310131 | TSS5000;TSS5000;TSS5000;3'UTR;3'UTR;TSS5000                                           | -1910    | KANK2;DOCK6;LOC105372273                               | KANK2        |
| cg01092528 | 8.71E-08 | 1.18E-05 | 5.857303 | 4   | 76861103 | Body;Body;Body                                                                        | 1063     | NAAA                                                   | NAAA         |
| cg25302704 | 8.71E-08 | 1.18E-05 | 5.857293 | 8   | 27470629 | Body;TSS5000;TSS1500;TSS5000                                                          | -1361    | CLU;MIR6843                                            | CLU          |
| cg02056325 | 8.71E-08 | 1.18E-05 | 5.857201 | 11  | 11087328 |                                                                                       | 207565   |                                                        | ZBED5-AS1    |
| cg15365949 | 8.72E-08 | 1.18E-05 | 5.857089 | 3   | 15141111 | TSS1500;TSS1500;TSS1500                                                               | -447     | RBSN                                                   | RBSN         |
| cg24586376 | 8.73E-08 | 1.18E-05 | 5.856779 | 7   | 955551   | Body;Body;Body;Body;Body                                                              | 4975     | ADAP1                                                  | ADAP1        |
| cg17016922 | 8.74E-08 | 1.18E-05 | 5.856483 | 5   | 1.41E+08 |                                                                                       | 50402    |                                                        | PCDH1        |
| cg00426425 | 8.75E-08 | 1.18E-05 | 5.856201 | 16  | 87677927 | Body;Body                                                                             | 41814    | JPH3                                                   | JPH3         |
| cg14233878 | 8.76E-08 | 1.18E-05 | 5.856049 | 9   | 1.4E+08  | Body                                                                                  | -6752    | HSPC324                                                | EGFL7        |
| cg03919942 | 8.76E-08 | 1.18E-05 | 5.855861 | 3   | 1.23E+08 | TSS5000;TSS5000;Body;Body;Body;Body;Body                                              | -13469   | MYLK-AS1;MYLK                                          | MYLK         |
| cg02722625 | 8.77E-08 | 1.18E-05 | 5.855777 | 3   | 52726624 | Body;Body;Body;TSS5000;TSS5000;TSS5000;TSS5000;TSS200;TSS5000;TSS5000;TSS5000;TSS5000 | -127     | GNL3;SNORD136;SNORD19;SNORD19B;SNORD19C;SNORD69;GLT8D1 | SNORD69      |
| cg11138192 | 8.77E-08 | 1.18E-05 | 5.855747 | 22  | 39965842 | TSS1500;TSS1500                                                                       | -915     | CACNA1I                                                | CACNA1I      |
| cg23636072 | 8.78E-08 | 1.18E-05 | 5.855505 | 11  | 1216443  | Body                                                                                  | -27852   | MUC5AC                                                 | MUC5B        |
| cg07297322 | 8.78E-08 | 1.18E-05 | 5.855414 | 16  | 74661825 | Body;Body;Body;Body;Body;Body;Body;Body                                               | -20813   | RFWD3                                                  | GLG1         |
| cg03652564 | 8.78E-08 | 1.18E-05 | 5.855347 | 1   | 1.65E+08 | Body;Body;Body;Body;Body                                                              | 90807    | PBX1                                                   | PBX1         |
| cg06569904 | 8.78E-08 | 1.18E-05 | 5.85534  | 3   | 42452635 | TSS1500;TSS1500                                                                       | -533     | LYZL4                                                  | LYZL4        |
| cg24071464 | 8.79E-08 | 1.18E-05 | 5.855239 | 2   | 97195532 | Body                                                                                  | 2511     | LOC105373496                                           | LOC105373496 |
| cg04756168 | 8.79E-08 | 1.18E-05 | 5.855226 | 11  | 1.17E+08 | TSS1500                                                                               | -1033    | APOC3                                                  | APOC3        |
| cg19754709 | 8.79E-08 | 1.18E-05 | 5.855119 | 16  | 2334346  | Body                                                                                  | 9726     | ABCA3                                                  | MIR4717      |
| cg21383284 | 8.79E-08 | 1.18E-05 | 5.855106 | 2   | 20826833 | Body                                                                                  | 24025    | HS1BP3                                                 | HS1BP3       |
| cg14321058 | 8.80E-08 | 1.18E-05 | 5.854996 | 11  | 1436177  | Body;Body;Body;Body;Body;Body                                                         | 3796     | BRSK2                                                  | BRSK2        |
| cg10767312 | 8.80E-08 | 1.18E-05 | 5.854956 | 13  | 78236645 | Body                                                                                  | 293      | LOC100129307                                           | LOC100129307 |
| cg19076895 | 8.80E-08 | 1.18E-05 | 5.854915 | 6   | 7633299  |                                                                                       | 42869    |                                                        | SNRNP48      |
| cg11753771 | 8.81E-08 | 1.18E-05 | 5.854665 | 1   | 2.15E+08 | 1stExon                                                                               | 86875    | PTPN14                                                 | PTPN14       |
| cg22506757 | 8.81E-08 | 1.18E-05 | 5.854661 | 1   | 5919703  | TSS5000;TSS5000;TSS5000;TSS5000;TSS5000                                               | 3098     | MIR4689;NPHP4                                          | MIR4689      |
| cg14873515 | 8.81E-08 | 1.18E-05 | 5.854648 | 5   | 1.5E+08  | Body;TSS1500                                                                          | -231     | NDST1                                                  | NDST1        |
| cg09477124 | 8.81E-08 | 1.18E-05 | 5.854647 | 3   | 10379281 | Body;Body;Body;Body;Body                                                              | 7369     | ATP2B2                                                 | MIR378B      |
| cg25031824 | 8.81E-08 | 1.18E-05 | 5.854514 | 17  | 3819363  | Body                                                                                  | 396      | P2RX1                                                  | P2RX1        |
| cg11414267 | 8.84E-08 | 1.19E-05 | 5.853935 | 10  | 99694717 | Body;Body                                                                             | -59063   | CRTAC1                                                 | MIR3085      |
| cg03038672 | 8.84E-08 | 1.19E-05 | 5.85386  | 16  | 3062056  | TSS1500;TSS5000                                                                       | -867     | CLDN9;CLDN6                                            | CLDN9        |
| cg27011898 | 8.84E-08 | 1.19E-05 | 5.853729 | 2   | 1.33E+08 | TSS5000                                                                               | -4819    | FAM201B                                                | FAM201B      |
| cg26004664 | 8.85E-08 | 1.19E-05 | 5.85356  | 4   | 1.84E+08 |                                                                                       | 44028    |                                                        | CTD          |
| cg06121207 | 8.85E-08 | 1.19E-05 | 5.853462 | 16  | 3494155  | TSS1500;Body;Body                                                                     | 476      | ZNF597;NAA60                                           | NAA60        |
| cg02370023 | 8.86E-08 | 1.19E-05 | 5.853219 | 17  | 80319923 | 5'UTR                                                                                 | 2801     | TEX19                                                  | TEX19        |
| cg03590257 | 8.88E-08 | 1.19E-05 | 5.852915 | 4   | 17805193 | Body;Body;Body;Body;Body;Body;Body;Body;Body;Body                                     | 7187     | DCAF16                                                 | DCAF16       |
| cg19707326 | 8.89E-08 | 1.19E-05 | 5.852449 | 14  | 24787611 | TSS5000;TSS5000;3'UTR;3'UTR;3'UTR                                                     | 5299     | LTB4R;ADCY4                                            | LTB4R        |
| cg21323028 | 8.89E-08 | 1.19E-05 | 5.852427 | 2   | 1.71E+08 | Body                                                                                  | 102668   | UBR3                                                   | UBR3         |
| cg06850158 | 8.90E-08 | 1.19E-05 | 5.852356 | 4   | 74567419 |                                                                                       | -38866   |                                                        | CXCL8        |
| cg13487655 | 8.90E-08 | 1.19E-05 | 5.852265 | 14  | 70497701 | 3'UTR;3'UTR                                                                           | 49233    | SMOC1                                                  | SLC8A3       |
| cg04506911 | 8.90E-08 | 1.19E-05 | 5.852216 | 10  | 72937119 |                                                                                       | -35207   |                                                        | UNC5B        |
| cg19910568 | 8.91E-08 | 1.19E-05 | 5.852019 | 10  | 22048295 | Body                                                                                  | 225135   | DNAJC1                                                 | MLL710       |
| cg19523255 | 8.91E-08 | 1.19E-05 | 5.851992 | 4   | 82439860 |                                                                                       | -46799   |                                                        | RASGEF1B     |
| cg12078872 | 8.91E-08 | 1.19E-05 | 5.851922 | 6   | 1.11E+08 | Body;Body;Body;Body;Body;Body;Body;Body                                               | 15149    | DDO                                                    | DDO          |
| cg17221993 | 8.92E-08 | 1.19E-05 | 5.851797 | 10  | 1234983  | Body                                                                                  | 29276    | ADARB2                                                 | LINC00200    |
| cg20919143 | 8.92E-08 | 1.19E-05 | 5.851789 | 14  | 1.06E+08 | Body;Body;1stExon;1stExon;Body                                                        | -23316   | BRF1                                                   | BRF1         |
| cg02335370 | 8.92E-08 | 1.19E-05 | 5.851787 | 8   | 33579138 |                                                                                       | -121514  |                                                        | DUSP26       |
| cg22127299 | 8.92E-08 | 1.19E-05 | 5.851608 | 6   | 27988718 |                                                                                       | -52375   |                                                        | OR1F12       |
| cg16106080 | 8.93E-08 | 1.19E-05 | 5.85157  | 7   | 1.4E+08  | 3'UTR                                                                                 | 22160    | RAB19                                                  | RAB19        |
| cg21847267 | 8.93E-08 | 1.19E-05 | 5.851413 | 7   | 1.43E+08 | Body;Body                                                                             | 16083    | CLCN1                                                  | FAM131B      |
| cg08571475 | 8.93E-08 | 1.19E-05 | 5.851411 | 6   | 11494909 |                                                                                       | -43072   |                                                        | TMEM170B     |
| cg08549026 | 8.93E-08 | 1.19E-05 | 5.851375 | 1   | 1.68E+08 | Body;Body;Body                                                                        | -34761   | RCSD1                                                  | MPZL1        |
| cg02014020 | 8.93E-08 | 1.19E-05 | 5.851363 | 1   | 1115461  | Body;Body;1stExon                                                                     | 401      | TLL10                                                  | TLL10        |
| cg19849323 | 8.93E-08 | 1.19E-05 | 5.851347 | 3   | 72286803 |                                                                                       | 86396    |                                                        | LINC00870    |
| cg00417963 | 8.94E-08 | 1.19E-05 | 5.851135 | 7   | 1529251  | Body                                                                                  | 14774    | INTS1                                                  | INTS1        |

| Probe      | p_adj    | q_val    | t        | Chr | Pos.hg19 | locations                                            | dist2TSS | gene.Illumina                         | gene.nearest |
|------------|----------|----------|----------|-----|----------|------------------------------------------------------|----------|---------------------------------------|--------------|
| cg21339555 | 8.96E-08 | 1.19E-05 | 5.850807 | 15  | 62536691 | Body                                                 | 4303     | GOLGA2P11                             | GOLGA2P11    |
| cg13405222 | 8.98E-08 | 1.20E-05 | 5.85023  | 6   | 20811065 | Body                                                 | 276378   | CDKAL1                                | CDKAL1       |
| cg04423464 | 8.98E-08 | 1.20E-05 | 5.850102 | 19  | 18779588 | TESS000;Body;Body;Body;Body;1stExon                  | -14901   | KLHL26                                | CRTC1        |
| cg18794473 | 8.99E-08 | 1.20E-05 | 5.849866 | 8   | 77617694 | 1stExon                                              | -22184   | ZFH4                                  | ZFH4-AS1     |
| cg00049475 | 9.00E-08 | 1.20E-05 | 5.849636 | 10  | 29923736 | 5'UTR;Body;Body;Body                                 | 164      | SVIL                                  | SVIL         |
| cg22782105 | 9.00E-08 | 1.20E-05 | 5.849604 | 10  | 63731624 | Body                                                 | 70167    | ARID5B                                | ARID5B       |
| cg09941453 | 9.01E-08 | 1.20E-05 | 5.849382 | 8   | 99812867 | Body;Body;Body                                       | 25032    | STK3                                  | STK3         |
| cg18423737 | 9.01E-08 | 1.20E-05 | 5.849334 | 18  | 46500072 |                                                      | -22991   | SMAD7                                 | SMAD7        |
| cg06648812 | 9.01E-08 | 1.20E-05 | 5.849263 | 4   | 619162   | TSS200;TSS200                                        | -200     | PDE6B                                 | PDE6B        |
| cg00160002 | 9.02E-08 | 1.20E-05 | 5.849125 | 2   | 2.37E+08 | Body;Body                                            | 44450    | AGAP1                                 | GBX2         |
| cg08708790 | 9.04E-08 | 1.20E-05 | 5.848614 | 16  | 22176873 | 5'UTR                                                | 3022     | SDR42E2                               | SDR42E2      |
| cg06448332 | 9.05E-08 | 1.20E-05 | 5.848464 | 16  | 1493343  | Body;TESS000;TESS000                                 | 1147     | CCDC154;CLCN7                         | CCDC154      |
| cg11838639 | 9.05E-08 | 1.20E-05 | 5.848463 | 10  | 3512917  | Body;Body                                            | 32113    | LOC105376360;LINCO2669                | LINC02669    |
| cg03433404 | 9.05E-08 | 1.20E-05 | 5.848393 | 16  | 57794955 | TESS000;Body;Body;Body;Body;Body;Body;Body;Body;Body | 11309    | KATNB1;KIFC3                          | MIR6772      |
| cg12958836 | 9.05E-08 | 1.20E-05 | -5.8483  | 12  | 8185024  | TSS1500                                              | -287     | FOXJ2                                 | FOXJ2        |
| cg17049320 | 9.05E-08 | 1.20E-05 | 5.848287 | 8   | 1.08E+08 | TSS1500                                              | -262     | ABRA                                  | ABRA         |
| cg21339084 | 9.06E-08 | 1.20E-05 | 5.848135 | 2   | 1.28E+08 | Body;Body;TSS1500;Body                               | -266     | LIMS2                                 | LIMS2        |
| cg11113753 | 9.09E-08 | 1.21E-05 | 5.84729  | 2   | 44065383 | Body;TSS1500;TSS1500                                 | 595      | ABCG5;ABCG8                           | ABCG5        |
| cg09096159 | 9.09E-08 | 1.21E-05 | 5.847255 | 22  | 46509557 | Body;Body;TESS000;TESS000;TSS200                     | -8       | MIRLET7BHG;MIRLET7A3;MIR4763;MIRLET7B | MIRLET7B     |
| cg14945317 | 9.11E-08 | 1.21E-05 | 5.846767 | 6   | 32363933 | Body;TESS000;Body                                    | 5647     | TSBP1-AS1;HCG23;BTNL2                 | HCG23        |
| cg14251805 | 9.12E-08 | 1.21E-05 | 5.846638 | 9   | 1.29E+08 | Body                                                 | -49619   | MVB12B                                | NRON         |
| cg07792815 | 9.12E-08 | 1.21E-05 | 5.846606 | 16  | 19474834 | Body;Body;Body;Body;Body                             | 7052     | TMC5                                  | TMC5         |
| cg07132038 | 9.12E-08 | 1.21E-05 | 5.846508 | 7   | 1.52E+08 | TSS1500;Body                                         | -1477    | PRKAG2;PRKAG2-AS1                     | PRKAG2       |
| cg16822777 | 9.13E-08 | 1.21E-05 | 5.846414 | 7   | 98649896 | Body;Body;Body                                       | 39109    | SMURF1                                | LOC101927550 |
| cg27295571 | 9.13E-08 | 1.21E-05 | 5.846321 | 20  | 30008142 | TESS000                                              | -7501    | DEFB122                               | DEFB121      |
| cg15665090 | 9.13E-08 | 1.21E-05 | 5.846285 | 6   | 31778371 | TSS5000;Body;TSS5000                                 | -3628    | LSM2;HSPA1L;HSPA1A                    | LSM2         |
| cg12165943 | 9.16E-08 | 1.21E-05 | 5.845623 | 15  | 93130167 |                                                      | -14674   |                                       | LINC00930    |
| cg06230513 | 9.16E-08 | 1.21E-05 | 5.845605 | 13  | 76069242 |                                                      | -12937   |                                       | TBC1D4       |
| cg05888433 | 9.16E-08 | 1.21E-05 | 5.845495 | 14  | 20711344 | 1stExon                                              | 394      | OR11H4                                | OR11H4       |
| cg12144870 | 9.18E-08 | 1.21E-05 | 5.845057 | 18  | 29525892 | TSS5000                                              | -2801    | TRAPPC8                               | TRAPPC8      |
| cg19026125 | 9.18E-08 | 1.21E-05 | 5.845056 | 10  | 461847   | Body                                                 | -212656  | DIP2C                                 | LOC101930421 |
| cg14258951 | 9.19E-08 | 1.21E-05 | 5.844869 | 2   | 2E+08    | Body;Body;Body                                       | 185582   | SATB2                                 | SATB2        |
| cg17423813 | 9.19E-08 | 1.21E-05 | 5.844799 | 10  | 1.21E+08 | Body                                                 | 26717    | GRK5                                  | GRK5         |
| cg17293838 | 9.20E-08 | 1.22E-05 | 5.844448 | 2   | 1797700  | Body;Body;Body;Body;Body;Body;Body;Body;Body         | -49413   | MYT1L                                 | PXDN         |
| cg00425177 | 9.21E-08 | 1.22E-05 | 5.844302 | 10  | 3058239  |                                                      | 50886    |                                       | LOC101927824 |
| cg22104371 | 9.22E-08 | 1.22E-05 | 5.844059 | 7   | 1787371  | 3'UTR                                                | -5425    | ELFN1                                 | ELFN1-AS1    |
| cg19772651 | 9.22E-08 | 1.22E-05 | 5.844031 | 12  | 57351191 | 1stExon;5'UTR                                        | 1967     | RDH16                                 | RDH16        |
| cg12736037 | 9.22E-08 | 1.22E-05 | 5.844004 | 6   | 1.64E+08 |                                                      | -202274  |                                       | LOC102724152 |
| cg06342870 | 9.23E-08 | 1.22E-05 | 5.843866 | 11  | 17455488 | Body;Body;Body;Body;Body;Body                        | 42904    | ABCC8                                 | ABCC8        |
| cg23282025 | 9.24E-08 | 1.22E-05 | 5.843549 | 2   | 1.7E+08  | TSS5000                                              | -2435    | PPIG                                  | PPIG         |
| cg23423230 | 9.24E-08 | 1.22E-05 | 5.843454 | 21  | 43327978 | Body;Body                                            | 18834    | C2CD2                                 | C2CD2        |
| cg11856561 | 9.25E-08 | 1.22E-05 | 5.843306 | 6   | 1.35E+08 | Body                                                 | 7101     | SGK1                                  | SGK1         |
| cg24945092 | 9.26E-08 | 1.22E-05 | 5.84303  | 17  | 11872861 | 3'UTR;3'UTR                                          | 27828    | DNAH9                                 | ZNF18        |
| cg17608529 | 9.26E-08 | 1.22E-05 | 5.843029 | 10  | 436626   | Body                                                 | 210693   | DIP2C                                 | ZMYND11      |
| cg17788227 | 9.27E-08 | 1.22E-05 | 5.842686 | 17  | 7347145  | Body;3'UTR;3'UTR;TSS1500                             | -1234    | FGF11;CHRNA1                          | CHRNA1       |
| cg02495250 | 9.28E-08 | 1.22E-05 | 5.842447 | 16  | 82735595 | Body;Body;Body;Body;Body;Body                        | 13060    | CDH13                                 | MIR8058      |
| cg08373477 | 9.29E-08 | 1.22E-05 | 5.842195 | 4   | 1957896  | Body;Body;Body;Body                                  | -18466   | NSD2                                  | SCARNA22     |
| cg09762115 | 9.30E-08 | 1.22E-05 | 5.842094 | 2   | 86095308 | TSS1500;Body;Body;Body;Body;Body;Body;Body;Body;Body | -515     | ST3GAL5                               | ST3GAL5      |
| cg08619669 | 9.30E-08 | 1.22E-05 | 5.842084 | 19  | 49493463 | Body;Body;Body;TSS5000;TSS5000;TSS5000;TSS5000       | 3103     | GYS1;RUVBL2                           | GYS1         |
| cg02579668 | 9.30E-08 | 1.22E-05 | 5.84192  | 1   | 28928325 | TESS000;TESS000                                      | 9319     | TAF12                                 | RAB42        |
| cg02343803 | 9.30E-08 | 1.22E-05 | 5.841861 | 19  | 58300127 |                                                      | 19084    |                                       | ZNF586       |
| cg17460183 | 9.31E-08 | 1.22E-05 | 5.841783 | 10  | 48370158 | Body;Body;Body;Body;Body;Body                        | 15090    | ZNF488                                | ZNF488       |
| cg00405043 | 9.33E-08 | 1.22E-05 | 5.841326 | 16  | 963814   | Body;Body;Body;Body;Body;Body;Body                   | -7218    | LMF1                                  | LMF1-AS1     |
| cg26794871 | 9.33E-08 | 1.23E-05 | 5.841173 | 20  | 44934712 | Body                                                 | 2425     | CDH22                                 | CDH22        |
| cg25352924 | 9.34E-08 | 1.23E-05 | 5.841028 | 7   | 2083583  | Body;Body;Body;Body;Body                             | 45104    | MAD1L1                                | SNORA114     |
| cg02717506 | 9.35E-08 | 1.23E-05 | 5.840718 | 3   | 56390366 | Body;Body                                            | 112129   | ERC2                                  | ERC2         |
| cg10459202 | 9.36E-08 | 1.23E-05 | 5.840567 | 4   | 3377595  | Body;Body;Body                                       | 5671     | RGS12                                 | RGS12        |
| cg01541650 | 9.37E-08 | 1.23E-05 | 5.840209 | 6   | 1.58E+08 | Body;Body;Body;Body;Body                             | 148408   | ARID1B                                | ARID1B       |
| cg08382035 | 9.37E-08 | 1.23E-05 | 5.840191 | 5   | 1.39E+08 | Body;Body;Body;Body;Body                             | 56551    | NRG2                                  | PSD2         |

| Probe      | p_adj    | q_val    | t        | Chr | Pos.hg19 | locations                                                                         | dist2TSS | gene.Illumina           | gene.nearest |
|------------|----------|----------|----------|-----|----------|-----------------------------------------------------------------------------------|----------|-------------------------|--------------|
| cg03726437 | 9.38E-08 | 1.23E-05 | 5.840091 | 17  | 3474461  | Body;Body;Body;Body                                                               | -13355   | TRPV1                   | TRPV3        |
| cg12386808 | 9.38E-08 | 1.23E-05 | 5.84008  | 3   | 44762171 | Body;Body;Body;Body;Body                                                          | 8020     | ZNF502                  | ZNF502       |
| cg21946195 | 9.38E-08 | 1.23E-05 | 5.839947 | 2   | 86012225 | Body;TSS1500                                                                      | -1425    | ATO8;MIR6071            | MIR6071      |
| cg05862007 | 9.39E-08 | 1.23E-05 | 5.839684 | 2   | 48950153 | Body;Body                                                                         | 32710    | STON1-GTF2A1L;LHCGR     | LHCGR        |
| cg00829041 | 9.40E-08 | 1.23E-05 | 5.839537 | 2   | 2.19E+08 | Body                                                                              | 1572     | DIRC3                   | DIRC3        |
| cg16748816 | 9.40E-08 | 1.23E-05 | 5.839445 | 11  | 1.24E+08 | TSS1500                                                                           | -1366    | OR10G9                  | OR10G9       |
| cg00217225 | 9.40E-08 | 1.23E-05 | 5.839405 | 4   | 1.53E+08 |                                                                                   | -45161   | FBXW7-AS1               | FBXW7-AS1    |
| cg01694527 | 9.41E-08 | 1.23E-05 | 5.839317 | 8   | 1.46E+08 | Body                                                                              | 15701    | ARHGAP39                | ARHGAP39     |
| cg26946836 | 9.41E-08 | 1.23E-05 | 5.8393   | 2   | 71064086 | TSS1500                                                                           | -1140    | CD207                   | CD207        |
| cg10616306 | 9.41E-08 | 1.23E-05 | -5.83921 | 5   | 87564718 | TSS200;TSS200;TSS200;TSS200;TSS200;TSS200;TSS200;TSS200;TSS200;Body;TSS200;TSS200 | 20       | TMEM161B;TMEM161B-AS1   | TMEM161B-AS1 |
| cg21922577 | 9.45E-08 | 1.23E-05 | 5.83827  | 5   | 1.49E+08 | Body                                                                              | 9753     | CSF1R                   | CSF1R        |
| cg10158715 | 9.47E-08 | 1.24E-05 | 5.83775  | 15  | 83382987 | TSS5000;TSS5000;TSS5000;TSS5000;TSS1500                                           | -242     | AP3B2;LOC338963         | LOC338963    |
| cg27625815 | 9.47E-08 | 1.24E-05 | 5.837658 | 8   | 8195300  | Body;Body;Body                                                                    | 48454    | PRAG1                   | PRAG1        |
| cg11828251 | 9.48E-08 | 1.24E-05 | 5.837586 | 1   | 1.11E+08 | Body                                                                              | 22549    | SLC6A17                 | SLC6A17      |
| cg22878469 | 9.48E-08 | 1.24E-05 | 5.837548 | 5   | 235427   | Body;Body;Body                                                                    | 16993    | SDHA                    | SDHA         |
| cg22971153 | 9.49E-08 | 1.24E-05 | 5.837351 | 2   | 1.14E+08 | TSS5000;TSS5000;TSS1500;TSS5000                                                   | -244     | IL36RN;IL1F10           | IL1F10       |
| cg08013274 | 9.51E-08 | 1.24E-05 | 5.836756 | 20  | 3709877  | TSS5000;TSS5000;TSS5000                                                           | -3454    | HSPA12B                 | HSPA12B      |
| cg01567754 | 9.52E-08 | 1.24E-05 | 5.836641 | 14  | 1.03E+08 | 3'UTR;TSS5000;TSS5000;TSS5000                                                     | 10558    | TECPR2;ANKRD9           | ANKRD9       |
| cg10287483 | 9.52E-08 | 1.24E-05 | 5.836495 | 17  | 74300440 | Body;Body                                                                         | 3321     | QRICH2                  | QRICH2       |
| cg16435782 | 9.55E-08 | 1.24E-05 | 5.83578  | 21  | 39087399 | Body                                                                              | 201361   | KCNJ6                   | KCNJ6        |
| cg15324331 | 9.55E-08 | 1.24E-05 | 5.835664 | 10  | 30085133 |                                                                                   | -59268   | SVIL                    | SVIL         |
| cg03940520 | 9.56E-08 | 1.24E-05 | 5.835604 | 17  | 47925010 | Body;Body;Body;Body;Body;TSS5000                                                  | 369      | TAC4;FLJ45513           | TAC4         |
| cg12116027 | 9.56E-08 | 1.25E-05 | 5.835428 | 12  | 58130410 | Body;Body                                                                         | 1619     | AGAP2                   | AGAP2        |
| cg21860675 | 9.57E-08 | 1.25E-05 | 5.835404 | 3   | 71586357 | Body;Body;Body;Body;Body;Body;Body;Body;Body;TSS5000                              | 4883     | FOX1;MIR1284            | MIR1284      |
| cg11643099 | 9.57E-08 | 1.25E-05 | 5.835246 | 1   | 26485229 | TSS1500                                                                           | -340     | FAM110D                 | FAM110D      |
| cg27515201 | 9.57E-08 | 1.25E-05 | 5.835206 | 1   | 33363113 | TSS5000;Body;Body;Body;Body;Body                                                  | 3877     | HPCA;TMEM54             | TMEM54       |
| cg01371004 | 9.58E-08 | 1.25E-05 | 5.835066 | 2   | 1.21E+08 | Body                                                                              | -114050  | PTPN4                   | EPB41L5      |
| cg10755016 | 9.58E-08 | 1.25E-05 | 5.835023 | 2   | 23607015 | TSS1500                                                                           | -1034    | KLHL29                  | KLHL29       |
| cg12274407 | 9.58E-08 | 1.25E-05 | 5.834992 | 1   | 1074226  | Body                                                                              | 1830     | LINC01342               | LINC01342    |
| cg21915998 | 9.59E-08 | 1.25E-05 | 5.834864 | 2   | 67060872 |                                                                                   | -70695   | LINC01799               | LINC01799    |
| cg10251973 | 9.59E-08 | 1.25E-05 | 5.834708 | 14  | 93419016 | Body;Body;Body;Body                                                               | 29522    | ITPK1                   | CHGA         |
| cg24152353 | 9.59E-08 | 1.25E-05 | 5.834685 | 1   | 6149107  | Body;Body;Body;Body;Body;Body                                                     | 43160    | KCNAB2                  | KCNAB2       |
| cg17865718 | 9.60E-08 | 1.25E-05 | 5.834664 | 3   | 1.04E+08 |                                                                                   | -683593  |                         | MIR548AB     |
| cg05405275 | 9.60E-08 | 1.25E-05 | 5.834511 | 7   | 1.51E+08 |                                                                                   | -24591   |                         | AOC1         |
| cg19816367 | 9.61E-08 | 1.25E-05 | 5.834337 | 1   | 3419426  | Body                                                                              | 48198    | MEGF6                   | ARHGEF16     |
| cg22828707 | 9.62E-08 | 1.25E-05 | 5.834114 | 14  | 79950202 | Body;Body;Body;Body;Body;Body;Body;Body;Body;Body;Body;Body                       | 204480   | NRXN3                   | NRXN3        |
| cg24710435 | 9.62E-08 | 1.25E-05 | 5.834038 | 10  | 14543847 |                                                                                   | 30866    |                         | FAM107B      |
| cg22145559 | 9.63E-08 | 1.25E-05 | 5.833904 | 20  | 57583009 | TSS1500                                                                           | -700     | CTSZ                    | CTSZ         |
| cg13793214 | 9.63E-08 | 1.25E-05 | 5.833767 | 9   | 95379929 | TSS5000;3'UTR;TSS5000;Body;TSS1500                                                | -402     | CENPP;IPPK;LOC100128361 | LOC100128361 |
| cg02145319 | 9.64E-08 | 1.25E-05 | 5.833651 | 16  | 339492   | TSS5000;Body;Body;Body                                                            | 6329     | PDIA2;AXIN1             | PDIA2        |
| cg10763141 | 9.64E-08 | 1.25E-05 | 5.83357  | 13  | 28589808 | Body;Body                                                                         | -26978   | FLT3                    | URAD         |
| cg18558108 | 9.64E-08 | 1.25E-05 | 5.833489 | 8   | 1.31E+08 | Body;Body;Body;Body;Body                                                          | 16810    | ASAP1                   | ASAP1        |
| cg19387862 | 9.65E-08 | 1.25E-05 | 5.833307 | 19  | 50931875 | 3'UTR;3'UTR;3'UTR;3'UTR;TSS5000                                                   | -4273    | SPIB;MYBPC2             | MYBPC2       |
| cg09368832 | 9.65E-08 | 1.25E-05 | 5.833269 | 17  | 9146934  | 3'UTR                                                                             | -64499   | NTN1                    | LOC101928266 |
| cg24315508 | 9.67E-08 | 1.25E-05 | 5.832842 | 3   | 43234682 |                                                                                   | -87111   |                         | POMGNT2      |
| cg18068923 | 9.68E-08 | 1.25E-05 | 5.832691 | 3   | 14386950 | TSS5000                                                                           | 7118     | LINC01267               | LINC01267    |
| cg24004139 | 9.68E-08 | 1.25E-05 | 5.832653 | 1   | 26670703 | 1stExon                                                                           | 9918     | CRYBG2                  | CRYBG2       |
| cg07126091 | 9.68E-08 | 1.25E-05 | 5.832577 | 8   | 1.41E+08 | Body                                                                              | 98205    | KCNK9                   | KCNK9        |
| cg11422092 | 9.68E-08 | 1.25E-05 | 5.832572 | 12  | 83744367 |                                                                                   | 663434   |                         | TMT2         |
| cg05860371 | 9.68E-08 | 1.25E-05 | 5.832554 | 4   | 1.53E+08 |                                                                                   | -90613   |                         | LINC02273    |
| cg09868359 | 9.68E-08 | 1.25E-05 | 5.832516 | 21  | 43230669 | Body;Body;Body;Body;Body;Body;Body                                                | -43457   | PRDM15                  | RIPK4        |
| cg07614623 | 9.69E-08 | 1.25E-05 | 5.832484 | 5   | 56600264 |                                                                                   | 90364    |                         | GPBP1        |
| cg11518883 | 9.69E-08 | 1.25E-05 | 5.832364 | 1   | 6758433  | Body                                                                              | 3443     | DNAJC11                 | DNAJC11      |
| cg18533365 | 9.70E-08 | 1.25E-05 | 5.832205 | 10  | 1.34E+08 | Body                                                                              | 70043    | INPP5A                  | INPP5A       |
| cg04181542 | 9.72E-08 | 1.25E-05 | 5.831775 | 6   | 1.01E+08 |                                                                                   | -142276  |                         | MCHR2        |
| cg05528931 | 9.72E-08 | 1.25E-05 | 5.83162  | 3   | 16539054 | Body                                                                              | 16152    | RFTN1                   | RFTN1        |
| cg01361261 | 9.73E-08 | 1.25E-05 | 5.831409 | 10  | 436604   | Body                                                                              | 210671   | DIP2C                   | ZMYND11      |
| cg19300655 | 9.73E-08 | 1.25E-05 | 5.83137  | 1   | 1.84E+08 | Body;Body;Body;TSS5000;TSS5000                                                    | -3833    | RGL1                    | RGL1         |
| cg08903422 | 9.73E-08 | 1.25E-05 | 5.831307 | 17  | 7328532  | TSS5000;TSS1500;TSS5000;TSS5000                                                   | -402     | SPEM1;SPEM2;SPEM3       | SPEM2        |
| cg26359389 | 9.74E-08 | 1.25E-05 | 5.831237 | 2   | 2.4E+08  | Body                                                                              | 6960     | HDAC4                   | MIR4440      |

| Probe      | p_adj    | q_val    | t        | Chr | Pos.hg19 | locations                                                                                       | dist2TSS | gene.Illumina                   | gene.nearest |
|------------|----------|----------|----------|-----|----------|-------------------------------------------------------------------------------------------------|----------|---------------------------------|--------------|
| cg07233483 | 9.75E-08 | 1.26E-05 | 5.830841 | 5   | 1.54E+08 | 3'UTR;Body                                                                                      | 26731    | GALNT10;SAP30L-AS1              | SAP30L-AS1   |
| cg00093829 | 9.76E-08 | 1.26E-05 | 5.830739 | 10  | 6247101  | Body;Body;Body;Body;Body;Body;Body                                                              | 2207     | PFKFB3                          | PFKFB3       |
| cg23877683 | 9.76E-08 | 1.26E-05 | 5.830723 | 10  | 88122364 | Body                                                                                            | 4188     | GRID1                           | GRID1        |
| cg12492670 | 9.76E-08 | 1.26E-05 | 5.830713 | 11  | 50231261 |                                                                                                 | 26372    |                                 | LOC441601    |
| cg04365255 | 9.77E-08 | 1.26E-05 | 5.830442 | 6   | 1.23E+08 | Body                                                                                            | 4213     | FABP7                           | FABP7        |
| cg22763136 | 9.78E-08 | 1.26E-05 | 5.830331 | 10  | 73395000 | Body;Body;Body;Body                                                                             | 84535    | CDH23                           | C10orf105    |
| cg02337695 | 9.79E-08 | 1.26E-05 | 5.829929 | 19  | 49585219 | TSS5000;TSS5000                                                                                 | -3488    | SNRNP70                         | SNRNP70      |
| cg20887522 | 9.80E-08 | 1.26E-05 | 5.829833 | 10  | 30918800 | TSS200                                                                                          | -118     | LYZL2                           | LYZL2        |
| cg04977343 | 9.80E-08 | 1.26E-05 | 5.82975  | 6   | 56777045 | Body                                                                                            | 42583    | DST                             | DST          |
| cg02264779 | 9.82E-08 | 1.26E-05 | 5.829247 | 22  | 24817310 | TSS5000;TSS5000;Body;TSS5000;TSS5000;TSS5000                                                    | -2254    | SPECC1L;SPECC1L-ADORA2A;ADORA2A | ADORA2A      |
| cg18753337 | 9.83E-08 | 1.26E-05 | 5.829074 | 15  | 80206998 | Body;Body;Body                                                                                  | -8114    | ST20-MTHFS;ST20                 | ST20-AS1     |
| cg17282592 | 9.84E-08 | 1.26E-05 | 5.828681 | 10  | 6797081  |                                                                                                 | 17738    |                                 | LINP1        |
| cg12952132 | 9.86E-08 | 1.27E-05 | 5.828284 | 19  | 55417647 | Body;Body;Body;Body;Body                                                                        | 142      | NCR1                            | NCR1         |
| cg19599165 | 9.87E-08 | 1.27E-05 | 5.828059 | 2   | 1.2E+08  | 3'UTR;TSS5000                                                                                   | 6098     | TMEM37;SCTR                     | TMEM37       |
| cg17925308 | 9.88E-08 | 1.27E-05 | 5.827756 | 14  | 69344852 | Body;Body;Body                                                                                  | -81892   | ACTN1                           | ZFP36L1      |
| cg11724750 | 9.89E-08 | 1.27E-05 | 5.827506 | 6   | 1.64E+08 | Body;Body;Body                                                                                  | 54211    | PACRG                           | PACRG-AS3    |
| cg02520816 | 9.90E-08 | 1.27E-05 | 5.82726  | 16  | 4056403  | Body                                                                                            | -55958   | ADCY9                           | LINC02861    |
| cg15370309 | 9.92E-08 | 1.27E-05 | 5.826956 | 17  | 9141550  | Body                                                                                            | -59115   | NTN1                            | LOC101928266 |
| cg04470324 | 9.92E-08 | 1.27E-05 | 5.826949 | 5   | 1.33E+08 | Body                                                                                            | 175695   | FSTL4                           | MIR1289-2    |
| cg24557027 | 9.93E-08 | 1.27E-05 | 5.826772 | 4   | 95335239 |                                                                                                 | -37768   |                                 | PDLIM5       |
| cg09977980 | 9.93E-08 | 1.27E-05 | 5.826732 | 17  | 18283678 | Body                                                                                            | 2587     | EVPL1                           | EVPL1        |
| cg05892673 | 9.95E-08 | 1.27E-05 | 5.826214 | 17  | 43335632 | Body;Body;Body;Body;TSS5000;TSS5000;TSS5000                                                     | -3814    | MAP3K14-AS1;SPATA32;MAP3K14     | MAP3K14-AS1  |
| cg02702692 | 9.95E-08 | 1.27E-05 | 5.826207 | 11  | 71724504 | Body;Body;Body;TSS1500                                                                          | -832     | NUMA1;LOC100128494              | LOC100128494 |
| cg14542378 | 9.97E-08 | 1.28E-05 | 5.825661 | 4   | 1.85E+08 | Body;Body                                                                                       | 105089   | STOX2                           | STOX2        |
| cg20984614 | 9.99E-08 | 1.28E-05 | 5.825148 | 8   | 1.45E+08 | Body;Body;Body;Body;Body;Body;Body;Body;Body;Body;TSS5000                                       | -4976    | ZNF707;BREA2                    | BREA2        |
| cg06519044 | 1.00E-07 | 1.28E-05 | 5.825013 | 17  | 79237297 | Body;Body                                                                                       | 23584    | SLC38A10                        | NDUFAF8      |
| cg24655428 | 1.00E-07 | 1.28E-05 | 5.824585 | 15  | 74467047 | Body;Body;TSS5000;TSS5000;TSS5000;TSS5000;TSS5000;TSS5000                                       | 160      | ISLR;STRA6                      | ISLR         |
| cg00436254 | 1.00E-07 | 1.28E-05 | 5.82451  | 2   | 1.28E+08 | Body;Body;Body;Body;Body;Body;Body;Body;Body;Body;Body                                          | 2116     | BIN1                            | BIN1         |
| cg14170172 | 1.00E-07 | 1.28E-05 | 5.824272 | 21  | 45675982 | Body;Body;TSS5000                                                                               | 5287     | DNMT3L;DNMT3L-AS1               | DNMT3L-AS1   |
| cg15035476 | 1.00E-07 | 1.28E-05 | 5.824162 | 19  | 46457107 | Body                                                                                            | 20016    | NOVA2                           | NOVA2        |
| cg04578792 | 1.00E-07 | 1.28E-05 | 5.824036 | 3   | 1.28E+08 |                                                                                                 | -30168   |                                 | DNAJB8-AS1   |
| cg08007639 | 1.00E-07 | 1.28E-05 | 5.823991 | 16  | 2999034  | 3'UTR;3'UTR                                                                                     | -15241   | FLYWCH1                         | KREMEN2      |
| cg09434667 | 1.01E-07 | 1.28E-05 | 5.823745 | 15  | 67078890 | TSS5000;TSS5000                                                                                 | 84317    | SMAD6                           | SMAD6        |
| cg02332902 | 1.01E-07 | 1.28E-05 | 5.823651 | 7   | 1103177  | Body;Body;Body;Body;Body;TSS5000;TSS5000;TSS5000                                                | 8172     | C7orf50;GPR146                  | GPR146       |
| cg18908677 | 1.01E-07 | 1.29E-05 | 5.823199 | 10  | 1.21E+08 | Body                                                                                            | 21232    | BAG3                            | BAG3         |
| cg03147430 | 1.01E-07 | 1.29E-05 | 5.823056 | 16  | 81929395 | Body                                                                                            | 115680   | PLCG2                           | SDR42E1      |
| cg03788952 | 1.01E-07 | 1.29E-05 | 5.822804 | 18  | 55474222 | TSS5000                                                                                         | -3675    | ATP8B1                          | ATP8B1       |
| cg24691014 | 1.01E-07 | 1.29E-05 | 5.822129 | 8   | 1.12E+08 |                                                                                                 | 331904   |                                 | LINC01608    |
| cg07571379 | 1.01E-07 | 1.29E-05 | 5.822109 | 11  | 1.35E+08 | Body                                                                                            | 25589    | LINC02714                       | LINC02714    |
| cg00902427 | 1.01E-07 | 1.29E-05 | 5.822087 | 22  | 41074991 | TSS200                                                                                          | -190     | MCHR1                           | MCHR1        |
| cg12903574 | 1.02E-07 | 1.29E-05 | 5.821514 | 15  | 37326903 | Body;Body;Body;Body;Body;Body;Body;Body                                                         | -61801   | MEIS2                           | MIR8063      |
| cg03873049 | 1.02E-07 | 1.29E-05 | 5.821439 | 5   | 1.5E+08  | Body;Body;Body;Body;Body                                                                        | 44142    | CAMK2A                          | CAMK2A       |
| cg12556802 | 1.02E-07 | 1.29E-05 | 5.821358 | 4   | 1.52E+08 | Body;Body;Body                                                                                  | -24016   | SH3D19                          | SH3D19       |
| cg00391945 | 1.02E-07 | 1.29E-05 | 5.821019 | 6   | 68598790 |                                                                                                 | -166452  |                                 | LOC102723883 |
| cg07280155 | 1.02E-07 | 1.29E-05 | 5.820833 | 8   | 41346222 | TSS5000;TSS5000;TSS5000;TSS5000;TSS5000;TSS5000;TSS5000;TSS5000                                 | -1692    | GOLGA7                          | GOLGA7       |
| cg11949175 | 1.02E-07 | 1.29E-05 | 5.820795 | 2   | 1.36E+08 | Body;Body;Body                                                                                  | 76153    | ZRANB3                          | SNORA40B     |
| cg20934799 | 1.02E-07 | 1.30E-05 | 5.820258 | 11  | 36433850 | Body;Body;Body;Body                                                                             | 11304    | PRR5L                           | PRR5L        |
| cg24336769 | 1.02E-07 | 1.30E-05 | 5.820111 | 6   | 38305513 | Body;Body;Body;Body                                                                             | -143858  | BTBD9                           | BTBD9-AS1    |
| cg27076046 | 1.02E-07 | 1.30E-05 | 5.820062 | 21  | 45683528 | TSS5000;TSS5000                                                                                 | -1748    | DNMT3L                          | DNMT3L       |
| cg01079795 | 1.02E-07 | 1.30E-05 | 5.819976 | 1   | 1.11E+08 |                                                                                                 | -90811   |                                 | CD53         |
| cg18973586 | 1.02E-07 | 1.30E-05 | 5.819831 | 4   | 963968   | Body                                                                                            | 3389     | DGKQ                            | DGKQ         |
| cg17471193 | 1.02E-07 | 1.30E-05 | 5.819776 | 6   | 32056667 | Body;Body                                                                                       | 20448    | TNXB                            | TNXB         |
| cg16500987 | 1.02E-07 | 1.30E-05 | 5.8194   | 6   | 1.67E+08 | Body;Body;Body                                                                                  | -64022   | RPS6KA2                         | RPS6KA2      |
| cg13639244 | 1.02E-07 | 1.30E-05 | 5.819267 | 17  | 17717006 | TSS5000;Body;Body;Body;TSS200;TSS5000                                                           | -147     | RAI1;SREBF1;MIR6777;MIR33B      | MIR6777      |
| cg02802750 | 1.03E-07 | 1.30E-05 | 5.819144 | 17  | 10543522 | Body                                                                                            | 17104    | MYH3                            | MYH3         |
| cg26894297 | 1.03E-07 | 1.30E-05 | 5.819062 | 1   | 23754550 | TSS5000;TSS1500;TSS1500;TSS1500;TSS1500;TSS1500;TSS1500;TSS1500;TSS1500;TSS1500;TSS1500;TSS1500 | -3309    | TCEA3;ASAP3                     | TCEA3        |
| cg08967456 | 1.03E-07 | 1.30E-05 | 5.818909 | 16  | 3114948  | TSS5000;TSS1500;TSS1500;TSS1500;TSS1500;TSS1500;TSS1500;TSS1500;TSS1500;TSS1500;TSS1500;TSS1500 | -455     | MMP25;IL32                      | IL32         |
| cg18375902 | 1.03E-07 | 1.30E-05 | 5.818743 | 4   | 7764949  | Body;3'UTR;3'UTR;3'UTR;3'UTR                                                                    | 9133     | AFAP1-AS1;AFAP1                 | AFAP1-AS1    |
| cg15381259 | 1.03E-07 | 1.30E-05 | 5.818444 | 7   | 26525682 | Body;Body;Body;Body;Body;Body                                                                   | 52762    | LOC441204                       | KIAA0087     |

| Probe      | p_adj    | q_val    | t        | Chr | Pos.hg19 | locations                                                                              | dist2TSS | gene.Illumina                                                | gene.nearest |
|------------|----------|----------|----------|-----|----------|----------------------------------------------------------------------------------------|----------|--------------------------------------------------------------|--------------|
| cg08324925 | 1.03E-07 | 1.30E-05 | 5.818292 | 5   | 1.31E+08 | TSS1500                                                                                | -322     | CSF2                                                         | CSF2         |
| cg08684959 | 1.03E-07 | 1.30E-05 | 5.818047 | 11  | 70031709 | Body;Body                                                                              | -17559   | ANO1                                                         | FADD         |
| cg14057644 | 1.03E-07 | 1.30E-05 | 5.817988 | 11  | 1.28E+08 | TESS000;TESS000;TESS000;TESS000                                                        | 64540    | ETS1                                                         | ETS1         |
| cg24601424 | 1.03E-07 | 1.30E-05 | 5.817933 | 2   | 1.93E+08 |                                                                                        | -8354    |                                                              | CAVIN2       |
| cg15745944 | 1.03E-07 | 1.30E-05 | 5.817794 | 17  | 39861969 |                                                                                        | -6613    |                                                              | GAST         |
| cg07972026 | 1.03E-07 | 1.30E-05 | 5.817639 | 6   | 1636961  | Body;Body                                                                              | 26812    | GMD5                                                         | FOXC1        |
| cg23485716 | 1.03E-07 | 1.31E-05 | 5.817555 | 10  | 390268   | Body                                                                                   | 164335   | DIP2C                                                        | ZMYND11      |
| cg24364282 | 1.03E-07 | 1.31E-05 | 5.817402 | 6   | 1.14E+08 |                                                                                        | -51764   |                                                              | MARCKS       |
| cg02167986 | 1.03E-07 | 1.31E-05 | 5.817172 | 14  | 68201122 | 3'UTR                                                                                  | 32520    | RDH12                                                        | RDH12        |
| cg07382129 | 1.03E-07 | 1.31E-05 | 5.817132 | 15  | 1E+08    | Body;Body;Body;Body;Body;Body;Body;Body;Body;Body;Body;Body;Body;Body;Body;Body;Body   | 24456    | MEF2A                                                        | LYSMD4       |
| cg02401639 | 1.03E-07 | 1.31E-05 | 5.816991 | 12  | 4405549  | Body                                                                                   | -20199   | CCND2                                                        | CCND2-AS1    |
| cg24057701 | 1.04E-07 | 1.31E-05 | 5.816931 | 13  | 1.12E+08 | Body                                                                                   | 30573    | LINC02337                                                    | LINC02337    |
| cg03466779 | 1.04E-07 | 1.31E-05 | 5.816891 | 4   | 7666141  | Body                                                                                   | -89675   | SORCS2                                                       | AFAP1-AS1    |
| cg27523644 | 1.04E-07 | 1.31E-05 | 5.816611 | 10  | 1.31E+08 |                                                                                        | -51260   |                                                              | MGMT         |
| cg02975187 | 1.04E-07 | 1.31E-05 | 5.816541 | 22  | 18512423 | Body                                                                                   | 273      | LINC01634                                                    | LINC01634    |
| cg26500398 | 1.04E-07 | 1.31E-05 | 5.816431 | 8   | 22974616 | 3'UTR                                                                                  | 14290    | TNFRSF10C                                                    | TNFRSF10C    |
| cg10262188 | 1.04E-07 | 1.31E-05 | 5.816203 | 10  | 490478   | Body                                                                                   | -184025  | DIP2C                                                        | LOC101930421 |
| cg09652142 | 1.04E-07 | 1.31E-05 | 5.816196 | 3   | 47932918 | Body;Body                                                                              | 41874    | MAP4                                                         | MIR1226      |
| cg21533544 | 1.04E-07 | 1.31E-05 | 5.81619  | 4   | 1.85E+08 | 3'UTR                                                                                  | -6064    | IRF2                                                         | LINC02362    |
| cg19476368 | 1.04E-07 | 1.31E-05 | 5.815828 | 11  | 1.22E+08 |                                                                                        | 207000   |                                                              | MIR125B1     |
| cg03552937 | 1.04E-07 | 1.31E-05 | 5.815665 | 7   | 44795713 | Body;Body;TSS200                                                                       | -73      | ZMIZ2                                                        | ZMIZ2        |
| cg03785426 | 1.04E-07 | 1.31E-05 | 5.815662 | 12  | 1.24E+08 | Body;Body;TESS000;TESS000;TESS000;TESS000;TESS000;TESS000                              | 36636    | DNAH10;CCDC92                                                | CCDC92       |
| cg26311677 | 1.04E-07 | 1.31E-05 | 5.815248 | 3   | 1.68E+08 | Body                                                                                   | -126692  | EGFEM1P                                                      | MIR551B      |
| cg02365577 | 1.04E-07 | 1.31E-05 | 5.815173 | 19  | 38486137 | Body                                                                                   | 88290    | SIPA1L3                                                      | SIPA1L3      |
| cg25422089 | 1.04E-07 | 1.31E-05 | 5.81515  | 17  | 72210927 | TESS000;TESS000;TSS1500;Body;TSS1500                                                   | -841     | RPL38;MGC16275;TTYH2                                         | TTYH2        |
| cg13554033 | 1.04E-07 | 1.31E-05 | 5.814985 | 14  | 99951125 | TESS000;TESS000;Body                                                                   | 3380     | SETD3;CCNK                                                   | CCNK         |
| cg16572910 | 1.04E-07 | 1.31E-05 | 5.814951 | 1   | 43880657 | Body;Body                                                                              | 25088    | SZT2                                                         | SZT2         |
| cg10406414 | 1.05E-07 | 1.31E-05 | 5.814681 | 8   | 49587029 | Body                                                                                   | 54067    | LOC101929268                                                 | LOC101929217 |
| cg00215019 | 1.05E-07 | 1.32E-05 | 5.813896 | 10  | 50311040 | Body;3'UTR                                                                             | 12527    | VSTM4                                                        | VSTM4        |
| cg23324442 | 1.05E-07 | 1.32E-05 | 5.813869 | 14  | 1.02E+08 | TSS1500                                                                                | -944     | LINC00239                                                    | LINC00239    |
| cg20663939 | 1.05E-07 | 1.32E-05 | 5.813861 | 15  | 72526917 | TESS000;TESS000;TSS000;TSS000;TSS000;TSS000;TSS000;TSS000                              | -2952    | PKM                                                          | PKM          |
| cg22553828 | 1.05E-07 | 1.32E-05 | 5.813842 | 5   | 1.74E+08 | TESS000                                                                                | 2307     | MIR4634                                                      | MIR4634      |
| cg14862385 | 1.05E-07 | 1.32E-05 | 5.813833 | 5   | 58321624 | Body;Body;Body;Body;Body;Body;Body;Body;Body;Body;Body;Body;Body;Body                  | 13679    | PDE4D                                                        | PDE4D        |
| cg10304865 | 1.05E-07 | 1.32E-05 | 5.813789 | 6   | 41371102 |                                                                                        | 67757    |                                                              | NCR2         |
| cg26007962 | 1.05E-07 | 1.32E-05 | 5.813761 | 1   | 973887   | Body;Body;Body                                                                         | 4515     | AGRN                                                         | AGRN         |
| cg06369573 | 1.05E-07 | 1.32E-05 | 5.81361  | 19  | 19755321 | TSS1500;TSS1500;TSS1500;TESS000                                                        | -855     | GMIP;ATP13A1                                                 | GMIP         |
| cg14049634 | 1.05E-07 | 1.32E-05 | 5.813491 | 9   | 1.16E+08 | Body;Body;Body;Body;Body;Body                                                          | -10151   | RGS3                                                         | RGS3         |
| cg19016444 | 1.05E-07 | 1.32E-05 | 5.81332  | 17  | 17061977 | Body;Body;Body                                                                         | 47670    | MPRIIP                                                       | PLD6         |
| cg23217463 | 1.05E-07 | 1.32E-05 | 5.813187 | 17  | 46676973 | Body;Body;Body;Body;Body;Body;Body;Body;Body;Body                                      | 3654     | HOXB-AS3;HOXB6                                               | HOXB-AS3     |
| cg09569989 | 1.05E-07 | 1.32E-05 | 5.812993 | 4   | 38053419 | Body;Body                                                                              | -58382   | TBC1D1                                                       | TBC1D1       |
| cg02883621 | 1.05E-07 | 1.32E-05 | 5.812892 | 4   | 6694923  | TESS000;TSS1500                                                                        | -681     | LINC002481;S100P                                             | S100P        |
| cg17695382 | 1.05E-07 | 1.32E-05 | -5.8127  | 2   | 61697821 | 1stExon                                                                                | 401      | USP34                                                        | USP34        |
| cg16314923 | 1.05E-07 | 1.32E-05 | 5.812545 | 12  | 7918357  | Body                                                                                   | 546      | NANOGNB                                                      | NANOGNB      |
| cg08616951 | 1.06E-07 | 1.32E-05 | 5.812397 | 11  | 394545   | Body;Body                                                                              | 337      | PKP3                                                         | PKP3         |
| cg18255764 | 1.06E-07 | 1.32E-05 | 5.812295 | 2   | 26405871 | Body;Body                                                                              | 2287     | GAREM2                                                       | GAREM2       |
| cg22454053 | 1.06E-07 | 1.32E-05 | 5.812152 | 1   | 79801791 |                                                                                        | -329376  |                                                              | ADGRL4       |
| cg02834447 | 1.06E-07 | 1.32E-05 | 5.812102 | 2   | 2.38E+08 |                                                                                        | 198762   |                                                              | LOC93463     |
| cg03795245 | 1.06E-07 | 1.32E-05 | 5.811871 | 12  | 6929671  | 3'UTR;3'UTR;3'UTR;3'UTR;3'UTR;TSS1500;TSS1500                                          | -1315    | CD4;GPR162                                                   | GPR162       |
| cg17082959 | 1.06E-07 | 1.32E-05 | 5.811674 | 1   | 2.09E+08 |                                                                                        | -117023  |                                                              | LINC01696    |
| cg07244783 | 1.06E-07 | 1.32E-05 | 5.811436 | 4   | 4432211  | Body;Body;Body;Body;Body                                                               | 31488    | STX18                                                        | STX18        |
| cg13528199 | 1.06E-07 | 1.32E-05 | 5.811402 | 10  | 1.35E+08 |                                                                                        | 50607    |                                                              | LINC01168    |
| cg03070534 | 1.06E-07 | 1.32E-05 | 5.81137  | 13  | 1.15E+08 |                                                                                        | -32339   |                                                              | RASA3        |
| cg04294388 | 1.06E-07 | 1.32E-05 | 5.811002 | 20  | 44780839 |                                                                                        | 33887    |                                                              | CD40         |
| cg25105990 | 1.06E-07 | 1.33E-05 | 5.810533 | 1   | 28921512 | 3'UTR;3'UTR                                                                            | 2506     | RAB42                                                        | RAB42        |
| cg06496010 | 1.07E-07 | 1.33E-05 | 5.810249 | 2   | 97201196 | TESS000;TSS1500;TSS1500;TSS1500;TSS1500;TSS1500;TSS1500;TSS000                         | -1292    | LOC105373496;ARID5A                                          | ARID5A       |
| cg04903829 | 1.07E-07 | 1.33E-05 | 5.810005 | 16  | 2027629  | Body;TESS000;TESS000;TESS000;TESS000                                                   | 3841     | TBL3;NOXO1                                                   | NOXO1        |
| cg14632918 | 1.07E-07 | 1.33E-05 | 5.809902 | 7   | 1.58E+08 | Body;Body;Body;Body;Body                                                               | 311023   | PTPRN2                                                       | LOC100506585 |
| cg05077865 | 1.07E-07 | 1.33E-05 | 5.809902 | 20  | 2637470  | Body;Body;Body;TESS000;TESS000;TESS000;TESS000;TESS000;TESS000;TESS000;TESS000;TESS000 | -114     | NOP56;MIR1292;SNORD110;SNORA51;SNORD86;SNORD56;SNORD57;IDH3B | SNORD57      |
| cg09258200 | 1.07E-07 | 1.33E-05 | 5.809397 | 4   | 77669688 | Body                                                                                   | 149609   | SHROOM3                                                      | SOWAHB       |

[illegible]

Illumina HumanMethylation 450 BeadChip analysis on cord blood DNA from infants (n=107).

Chr=chromosome. Pos\_hg19=position on Genome Reference Consortium Human Build 37 (GRCh37, hg19). dist2TSS=distance to transcription start site.

| #eng | nadi | g_val | Meth.BDD | Meth.nonBDD | dMeth | significance | Chr | pos hg10 |
|------|------|-------|----------|-------------|-------|--------------|-----|----------|
|------|------|-------|----------|-------------|-------|--------------|-----|----------|

| #cpg       | p_adj    | q_val       | Meth.BPD    | Meth.nonBPD | dMeth        | significance | Chr | pos.hg19  | locations                                                                     | dist2TSS | gene.nearest | gene.Illumina                   |
|------------|----------|-------------|-------------|-------------|--------------|--------------|-----|-----------|-------------------------------------------------------------------------------|----------|--------------|---------------------------------|
| cg23328237 | 9.26E-12 | 4.14E-06    | 0.849641642 | 0.853523317 | -0.003881675 | BF FDR0.01   | 15  | 79252815  | 3'UTR;3'UTR;3'UTR                                                             | -15375   | CTSH         | RASGRF1                         |
| cg08139238 | 7.41E-11 | 1.66E-05    | 0.774967052 | 0.819469637 | -0.044502585 | BF FDR0.01   | 16  | 22219550  | Body                                                                          | 1959     | EEF2K        | EEF2K                           |
| cg14448850 | 4.46E-10 | 6.64E-05    | 0.886345564 | 0.901223039 | -0.014877475 | BF FDR0.01   | 7   | 22860191  | Body                                                                          | 2280     | TOMM7        | TOMM7                           |
| cg22707878 | 6.17E-10 | 6.90E-05    | 0.816786549 | 0.837319708 | -0.020533159 | BF FDR0.01   | 3   | 122604848 | TESS000;TSS1500                                                               | -511     | LINC02035    | DIRC2;LINC02035;SLC49A4         |
| cg23540651 | 9.46E-10 | 8.46E-05    | 0.819033795 | 0.847103698 | -0.028069903 | BF FDR0.01   | 1   | 89490034  | TSS1500;TSS1500;TSS1500;TSS1500;TSS1500                                       | -1485    | GBP3         | GBP3                            |
| cg26968498 | 2.58E-09 | 0.000191968 | 0.870714636 | 0.893481327 | -0.022766691 | BF FDR0.01   | 4   | 26174157  | Body                                                                          | 9081     | RBPJ         | RBPJ                            |
| cg00013369 | 5.54E-09 | 0.000348642 | 0.846119428 | 0.859335114 | -0.013215687 | BF FDR0.01   | 1   | 192857594 | Body;Body;Body;Body                                                           | -12479   | RN75SKP126   | RP11-139E24.1;LINC01032         |
| cg19815139 | 6.24E-09 | 0.000348642 | 0.061461172 | 0.056136464 | 0.005324708  | BF FDR0.01   | 14  | 77924143  | TSS200;TSS1500;TSS200;TSS200;TSS200;TSS200                                    | -76      | AHSA1        | VIPAS39;AHSA1                   |
| cg05577945 | 7.20E-09 | 0.000349426 | 0.052325138 | 0.045412247 | 0.006912892  | BF FDR0.01   | 13  | 78271874  | TESS000;TSS200;TSS1500;TSS1500                                                | -114     | SLAIN1       | MIR3665;SLAIN1                  |
| cg16708174 | 7.81E-09 | 0.000349426 | 0.768023451 | 0.784226033 | -0.016202583 | BF FDR0.01   | 3   | 158430962 | Body;Body                                                                     | 19313    | RARRES1      | RARRES1                         |
| cg06342416 | 1.48E-08 | 0.000567015 | 0.1594111   | 0.161170593 | -0.001759493 | BF FDR0.01   | 21  | 45773569  | 5'UTR;5'UTR;5'UTR;Body                                                        | 86       | TRPM2        | TRPM2                           |
| cg26371345 | 1.64E-08 | 0.000567015 | 0.16819043  | 0.128373094 | 0.039817336  | BF FDR0.01   | 6   | 44090748  | TSS5000;Body;Body;Body;Body;Body;TSS5000;Body                                 | 3256     | MRPL14       | TMEM638;MRPL14                  |
| cg22148297 | 1.65E-08 | 0.000567015 | 0.14387923  | 0.110502046 | 0.033377184  | BF FDR0.01   | 13  | 99910587  | Body;Body;5'UTR;Body;5'UTR                                                    | 95       | GPR18        | UBAC2;GPR18                     |
| cg24025538 | 2.03E-08 | 0.000648594 | 0.857670733 | 0.869462908 | -0.011792175 | BF FDR0.01   | 19  | 50364499  | 3'UTR;TESS000;TSS5000;TESS000;TESS000;TESS000;TESS000;TESS000;TESS000;TESS000 | -1953    | PTOV1-AS2    | PNKP;PTOV1;PTOV1-AS2            |
| cg09757859 | 2.31E-08 | 0.000667306 | 0.855357252 | 0.858453903 | -0.003186651 | BF FDR0.01   | 4   | 119948505 | Body;Body;Body;Body                                                           | -108433  | MYO22        | SYNP02                          |
| cg09551145 | 2.52E-08 | 0.000667306 | 0.112575594 | 0.110505544 | 0.00207005   | BF FDR0.01   | 1   | 117905911 | TESS000                                                                       | -5549    | AGTRAP       | DRAXIN                          |
| cg22833603 | 2.54E-08 | 0.000667306 | 0.849351644 | 0.872421165 | -0.023069521 | BF FDR0.01   | 12  | 48304627  | Body;TESS000                                                                  | 5723     | RP11-89H19.2 | VDR;RP11-89H19.2                |
| cg20084577 | 3.20E-08 | 0.000757184 | 0.086925671 | 0.833170019 | -0.026244348 | BF FDR0.01   | 13  | 33780913  | TSS1500;Body;Body;TSS1500                                                     | -726     | STARD13      | STARD13                         |
| cg06787669 | 3.22E-08 | 0.000757184 | 0.06575987  | 0.053851569 | -0.011908218 | BF FDR0.01   | 7   | 45018789  | TESS000;TSS200;TESS000;TESS000;TESS000;TESS000                                | -85      | MYO1G        | SNHG15;MYO1G                    |
| cg18067163 | 3.93E-08 | 0.000859377 | 0.769764803 | 0.781723609 | -0.011958806 | BF FDR0.01   | 3   | 128584482 | Body                                                                          | 5902     | LOC653712    | LOC653712                       |
| cg24252723 | 4.04E-08 | 0.000859377 | 0.033903109 | 0.028243164 | 0.005659945  | BF FDR0.01   | 10  | 104678150 | 5'UTR;5'UTR;5'UTR                                                             | 76       | CNNM2        | CNNM2;LOC107984265;LOC107984265 |
| cg07733260 | 4.27E-08 | 0.000866953 | 0.835412569 | 0.842587423 | -0.007174854 | BF FDR0.01   | 3   | 4355431   | Body;Body;Body;Body;Body;Body                                                 | 10444    | SETMAR       | SETMAR                          |
| cg16176600 | 4.46E-08 | 0.000866953 | 0.701349752 | 0.718366877 |              |              |     |           |                                                                               |          |              |                                 |

















































| #cpg       | p_adj     | q_val       | Meth.BPD    | Meth.nonBPD | dMeth        | significance | Chr | pos.hg19  | locations                                                                                     | dist2TSS | gene.nearest  | gene.illumina                                                                     |
|------------|-----------|-------------|-------------|-------------|--------------|--------------|-----|-----------|-----------------------------------------------------------------------------------------------|----------|---------------|-----------------------------------------------------------------------------------|
| cg02062816 | 0.0001421 | 0.044965896 | 0.663209864 | 0.686310554 | -0.02310069  | FDR0.05      | 1   | 163166949 | Body;Body;Body;Body;Body                                                                      | 6014     | RG55          | LOC101928404;RG55                                                                 |
| cg22816343 | 0.0001422 | 0.044965896 | 0.724941987 | 0.79946145  | -0.074519463 | FDR0.05      | 8   | 26243601  | TSS5000;Body;TSS5000                                                                          | 3079     | BNIP3L        | BNIP3L;SDAD1P1                                                                    |
| cg22758697 | 0.0001428 | 0.045127026 | 0.069251772 | 0.059719989 | 0.009531783  | FDR0.05      | 10  | 51572216  | Body;Body;Body;Body;TSS200;Body;Body;Body;Body;Body;Body;Body;Body;Body;TSS000;Body;Body;Body | -147     | NCOA4         | TIMM23B;TIMM23B-AGAP6;NCOA4                                                       |
| cg12305753 | 0.000143  | 0.045164258 | 0.747528168 | 0.752080412 | -0.004552244 | FDR0.05      | 21  | 35883992  | TSS1500;TSS1500;TSS5000;TSS5000;TSS5000;TSS5000;TSS5000;TSS1500;Body                          | -355     | KCNE1         | KCNE1;RCAN1                                                                       |
| cg10817479 | 0.0001432 | 0.04518337  | 0.824091576 | 0.834056814 | -0.009965238 | FDR0.05      | 8   | 104225713 | Body;Body;Body                                                                                | -41345   | BAALC-AS1     | BAALC                                                                             |
| cg04442638 | 0.0001433 | 0.04518337  | 0.146832439 | 0.181211356 | -0.034378917 | FDR0.05      | 17  | 73873823  | Body                                                                                          | 833      | TRIM47        | TRIM47                                                                            |
| cg13491462 | 0.0001435 | 0.045239288 | 0.025008084 | 0.019404894 | 0.005603019  | FDR0.05      | 6   | 1384491   | Body                                                                                          | 810      | RP4-668J2.2   | RP4-668J2.2                                                                       |
| cg26877715 | 0.0001438 | 0.045280356 | 0.029112777 | 0.021513054 | 0.007599723  | FDR0.05      | 20  | 37353907  | Body                                                                                          | 803      | SLC32A1       | SLC32A1                                                                           |
| cg09323247 | 0.0001439 | 0.045285819 | 0.03559184  | 0.030186788 | 0.005405052  | FDR0.05      | 10  | 135208072 | Body;TES5000;TES5000;TES5000;TES5000;TES5000;TES5000                                          | 452      | MTG1          | MTG1;PAOX                                                                         |
| cg19462712 | 0.000144  | 0.045285819 | 0.883595255 | 0.874161602 | 0.009433653  | FDR0.05      | 19  | 34744703  | TSS1500                                                                                       | -752     | KIAA0355      | KIAA0355                                                                          |
| cg04118884 | 0.0001445 | 0.045375079 | 0.050945976 | 0.045196455 | 0.005749521  | FDR0.05      | 2   | 220407999 | TES5000;TSS1500;TES5000;TSS200;1stExon;TSS1500                                                | -180     | CHPF          | ASIC4;TMEM198;CHPF                                                                |
| cg05944260 | 0.0001446 | 0.045375079 | 0.741734967 | 0.756034444 | -0.014299477 | FDR0.05      | 1   | 32264223  | Body;Body;Body                                                                                | 17429    | SPOCD1        | SPOCD1                                                                            |
| cg20645058 | 0.0001446 | 0.045375079 | 0.85982125  | 0.86256301  | -0.00274176  | FDR0.05      | 12  | 10163532  | Body;TES5000;Body;Body;Body;Body                                                              | 307      | CLEC12B       | CLEC12B;LOC102724020                                                              |
| cg22983092 | 0.0001447 | 0.045375079 | 0.781273837 | 0.736000464 | 0.045273373  | FDR0.05      | 17  | 38911538  | 5'UTR                                                                                         | 46       | KRT25         | KRT25                                                                             |
| cg01842741 | 0.0001445 | 0.045446728 | 0.874938901 | 0.89145693  | -0.016518029 | FDR0.05      | 12  | 113503757 | Body                                                                                          | 8096     | DTX1          | DTX1                                                                              |
| cg04963153 | 0.0001452 | 0.045484597 | 0.671208002 | 0.690924608 | -0.019716606 | FDR0.05      | 15  | 78555966  | TSS5000;TSS1500;TSS1500                                                                       | -520     | DNAJA4        | DNAJA4                                                                            |
| cg03739480 | 0.0001456 | 0.045502791 | 0.900547373 | 0.887193659 | 0.013353715  | FDR0.05      | 12  | 57821471  | Body;Body;Body;Body;Body;Body;Body;Body;Body;Body                                             | 3316     | R3HDM2        | R3HDM2                                                                            |
| cg04915788 | 0.0001456 | 0.045502791 | 0.855641593 | 0.872135329 | -0.016493736 | FDR0.05      | 12  | 25156888  | Body                                                                                          | 6393     | LOC645177     | LOC645177                                                                         |
| cg08203624 | 0.0001457 | 0.045502791 | 0.797462425 | 0.816368365 | -0.01890594  | FDR0.05      | 8   | 125284043 | Body                                                                                          | 120      | RP11-383J24.1 | RP11-383J24.1                                                                     |
| cg07434944 | 0.0001457 | 0.045502791 | 0.739012422 | 0.723631921 | 0.015380501  | FDR0.05      | 11  | 1991814   | Body;Body                                                                                     | 15008    | MRPL23        | MRPL23                                                                            |
| cg03184368 | 0.0001458 | 0.045518088 | 0.771719281 | 0.794088721 | -0.02236944  | FDR0.05      | 4   | 40555722  | Body                                                                                          | -37732   | RBM47         | RBM47                                                                             |
| cg11670060 | 0.0001461 | 0.045554226 | 0.166308332 | 0.155979117 | 0.010329215  | FDR0.05      | 5   | 145316416 | Body                                                                                          | 291      | SH3RF2        | SH3RF2                                                                            |
| cg00463957 | 0.0001462 | 0.045554226 | 0.805767871 | 0.816624659 | -0.010856788 | FDR0.05      | 16  | 14583487  | Body;Body;Body                                                                                | -119364  | LINC02130     | PARN                                                                              |
| cg20005056 | 0.0001463 | 0.045554226 | 0.713313925 | 0.694580422 | 0.018733503  | FDR0.05      | 2   | 26398944  | Body;TSS5000                                                                                  | 3035     | GAREM2        | GAREM2                                                                            |
| cg18930076 | 0.0001464 | 0.045555397 | 0.050881033 | 0.044038557 | 0.006842476  | FDR0.05      | 11  | 64216573  | Body                                                                                          | 45       | LOC100996455  | LOC100996455                                                                      |
| cg24274995 | 0.0001469 | 0.045672216 | 0.955597903 | 0.952123382 | 0.00347452   | FDR0.05      | 7   | 39500288  | Body;Body                                                                                     | -54343   | POU6F2-AS1    | POU6F2                                                                            |
| cg15983072 | 0.000147  | 0.045672216 | 0.782148627 | 0.7860879   | -0.003939274 | FDR0.05      | 2   | 146688047 | Body                                                                                          | 15390    | AC062031.1    | AC062031.1                                                                        |
| cg27614215 | 0.0001471 | 0.045672216 | 0.773693515 | 0.763830547 | 0.009862969  | FDR0.05      | 2   | 129251945 |                                                                                               | -49173   | RNA5SP103     |                                                                                   |
| cg19937288 | 0.0001473 | 0.04571725  | 0.894059548 | 0.895100495 | -0.001040946 | FDR0.05      | 14  | 101199873 | Body;Body                                                                                     | 6672     | DLK1          | DLK1                                                                              |
| cg21205276 | 0.0001475 | 0.04571725  | 0.022827384 | 0.024498359 | -0.001670975 | FDR0.05      | 9   | 95056231  | TSS1500;TSS200;TES5000;TSS200;TES5000;TSS200;TES5000;TES5000;TSS1500                          | -193     | IARS          | MIR3651;IARS;NOL8;SNORA84                                                         |
| cg08339023 | 0.0001475 | 0.04571725  | 0.130350196 | 0.111060384 | 0.019289813  | FDR0.05      | 12  | 57873732  | TSS200;TSS5000;TSS1500;TSS5000;TSS5000;Body                                                   | -77      | ARHGAP9       | ARHGAP9                                                                           |
| cg12991522 | 0.0001477 | 0.04571725  | 0.031217891 | 0.028231588 | 0.002986303  | FDR0.05      | 16  | 4986661   | Body                                                                                          | 475      | PPL           | PPL                                                                               |
| cg05526341 | 0.0001478 | 0.04571725  | 0.763065304 | 0.755483955 | 0.007581349  | FDR0.05      | 3   | 66489362  | Body                                                                                          | 61483    | LRIG1         | LRIG1                                                                             |
| cg08795752 | 0.0001479 | 0.04571725  | 0.468870051 | 0.434054754 | 0.034815297  | FDR0.05      | 9   | 136293721 | Body;Body;Body;Body                                                                           | 6152     | ADAMTS13      | ADAMTS13                                                                          |
| cg11284482 | 0.0001479 | 0.04571725  | 0.031966238 | 0.028891771 | 0.003074467  | FDR0.05      | 4   | 99388941  | TES5000                                                                                       | 190871   | TSPAN5        | TSPAN5                                                                            |
| cg12802537 | 0.000148  | 0.045719131 | 0.895977689 | 0.901952963 | -0.005975275 | FDR0.05      | 1   | 221870819 | TES5000;TES5000;TES5000                                                                       | 39423    | DUSP10        | DUSP10                                                                            |
| cg11835355 | 0.0001484 | 0.045795739 | 0.773484951 | 0.799291021 | -0.02580607  | FDR0.05      | 22  | 36561746  | TSS5000;5'UTR;3'UTR;TSS5000;TSS5000;TSS5000                                                   | 479      | APOL3         | APOL3                                                                             |
| cg07270175 | 0.0001485 | 0.045807702 | 0.069375764 | 0.057515178 | 0.011860586  | FDR0.05      | 10  | 96123049  | TSS1500                                                                                       | -316     | NOC3L         | NOC3L                                                                             |
| cg15769724 | 0.0001488 | 0.045872005 | 0.028815107 | 0.025569201 | 0.003245906  | FDR0.05      | 15  | 89787113  | TSS200;TSS200                                                                                 | -80      | FANCI         | FANCI                                                                             |
| cg09294072 | 0.0001494 | 0.046020926 | 0.450317049 | 0.49355989  | -0.043242842 | FDR0.05      | 14  | 106366523 | TES5000;TES5000;TSS5000;TSS5000;TSS200;TES5000;TES5000;TES5000;TES5000;TES5000                | -11      | IGHD1-14      | AL12127.25;IGHD3-16;IGHD2-15;IGHD1-14;IGHD6-13;IGHD5-12;IGHD4-11;IGHD3-10;IGHD3-9 |
| cg04794690 | 0.0001498 | 0.046114044 | 0.194215748 | 0.200668597 | -0.006452849 | FDR0.05      | 1   | 17768059  | TSS5000;TSS5000                                                                               | -1809    | RCC2          | RCC2                                                                              |
| cg02587120 | 0.0001502 | 0.046215015 | 0.832532313 | 0.845866663 | -0.01333435  | FDR0.05      | 15  | 50557873  | 5'UTR;5'UTR                                                                                   | 289      | HDC           | HDC                                                                               |
| cg07980405 | 0.0001507 | 0.046315634 | 0.032986299 | 0.027639608 | 0.005346691  | FDR0.05      | 6   | 31870281  | TSS1500;Body;Body;TSS5000;TSS5000                                                             | -512     | ZBTB12        | ZBTB12;C2;EHMT2                                                                   |
| cg21222449 | 0.000151  | 0.046365288 | 0.803407675 | 0.801942702 | 0.01464973   | FDR0.05      | 22  | 51176711  | TSS200;1stExon                                                                                | 60       | ACR           | LOC105373100;ACR                                                                  |
| cg17607368 | 0.0001511 | 0.046365288 | 0.019068072 | 0.018060712 | 0.00100736   | FDR0.05      | 13  | 78272393  | TSS200;1stExon;TSS1500;TSS1500                                                                | -142     | MIR3665       | MIR3665;SLAIN1                                                                    |
| cg18100586 | 0.0001512 | 0.046365288 | 0.932942723 | 0.93933598  | -0.006393257 | FDR0.05      | 8   | 67783733  | TSS200;Body;Body                                                                              | -3       | MCMDC2        | MCMDC2                                                                            |
| cg23696712 | 0.0001513 | 0.046365288 | 0.678429408 | 0.693820314 | -0.015390906 | FDR0.05      | 12  | 53228141  | TES5000;TSS200;TES5000                                                                        | -64      | KRT79         | KRT78;KRT79                                                                       |
| cg20118857 | 0.0001519 | 0.04652031  | 0.032343704 | 0.029031826 | 0.003311878  | FDR0.05      | 17  | 48228624  | TSS1500                                                                                       | -746     | PPP1R9B       | PPP1R9B                                                                           |
| cg12698607 | 0.0001522 | 0.04652031  | 0.862616582 | 0.857401905 | 0.005214676  | FDR0.05      | 22  | 17660636  | 3'UTR;3'UTR;3'UTR;3'UTR;3'UTR;3'UTR                                                           | -14459   | HDHD5         | ADA2                                                                              |
| cg14430943 | 0.0001522 | 0.04652031  | 0.147749277 | 0.141686236 | 0.006063041  | FDR0.05      | 7   | 155556652 | Body                                                                                          | 45114    | SHH           | RBM33                                                                             |
| cg02344373 | 0.0001522 | 0.04652031  | 0.833451921 | 0.805023828 | 0.028428092  | FDR0.05      | 12  | 133201348 | TES5000;TES5000;TES5000;TES5000;TES5000;TES5000;TES5000;Body;TES5000                          | 5983     | P2RX2         | P2RX2;POLE                                                                        |
| cg11441891 | 0.0001523 | 0.04652031  | 0.826055564 | 0.837610997 | -0.011555432 | FDR0.05      | 3   | 46719625  | Body;Body;Body;Body                                                                           | 15521    | ALS2CL        | ALS2CL                                                                            |
| cg13151006 | 0.0001526 | 0.046535986 | 0.869917688 | 0.87421294  | -0.004295252 | FDR0.05      | 15  | 72075835  | TES5000;TES5000                                                                               | -27052   | NR2E3         | THSD4                                                                             |
| cg12125501 | 0.0001527 | 0.046535986 | 0.970871359 | 0.979254068 | -0.008382709 | FDR0.05      | 8   | 143719601 | TSS1500                                                                                       | -347     | LOC101928087  | LOC101928087                                                                      |
| cg22760304 | 0.0001528 | 0.046535986 | 0.624634267 | 0.596693746 | 0.027940521  | FDR0.05      | 19  | 14607597  | TSS1500;TSS1500;TSS1500;TSS1500;TSS1500                                                       | -636     | GIPC1         | GIPC1                                                                             |





| #cpg       | p_adj     | q_val       | Meth.BPD    | Meth.nonBPD | dMeth       | significance | Chr | pos.hg19  | locations                                                           | dist2TSS | gene.nearest | gene.Illumina                                      |
|------------|-----------|-------------|-------------|-------------|-------------|--------------|-----|-----------|---------------------------------------------------------------------|----------|--------------|----------------------------------------------------|
| cg14159895 | 0.0001763 | 0.049948965 | 0.023574551 | 0.020968427 | 0.002606124 | FDR0.05      | 6   | 31509605  | TESS000;Body;Body;Body;TESS000;TSS1500;Body;TSS1500;TESS000;TSS1500 | -475     | DDX39B-AS1   | ATP6V1G2;DDX39B;ATP6V1G2-DDX39B;DDX39B-AS1;SNORD84 |
| cg03158314 | 0.0001766 | 0.049997436 | 0.858764161 | 0.858635902 | 0.000128259 | FDR0.05      | 16  | 84513159  | 3'UTR                                                               | -12192   | ATP2C2-AS1   | MEAK7                                              |
| cg10851739 | 0.0001767 | 0.049998955 | 0.065132352 | 0.054984588 | 0.010147764 | FDR0.05      | 12  | 131996019 |                                                                     | -18523   | RP11-897M7.1 |                                                    |

**Table S5. The number of probes identified by differential methylation analysis.**  
The input files are methylation (Meth) or winsorized methylation (wins\_Meth)

|                  |           |            |
|------------------|-----------|------------|
| Input            | BF        | FDR1       |
| <b>Meth</b>      | <b>38</b> | <b>275</b> |
| <b>wins_Meth</b> | <b>45</b> | <b>249</b> |
| (common)         | 30        | 214        |
| (overlap(%))     | 78.9%     | 85.9%      |

**Table S6. Association of stochastic epimutation load (EML) with BPD and other covariates**

lm = linear regression; bicor = Biweight Midcorrelation

|                             | P(lm)           | slope(lm)      | P(bicor)        | r(bicor)        |
|-----------------------------|-----------------|----------------|-----------------|-----------------|
| <b>BPD</b>                  | <b>4.18E-05</b> | <b>1.48415</b> | <b>0.000656</b> | <b>0.324273</b> |
| Sex                         | 0.097927        | -0.43193       | 0.206817        | -0.12302        |
| GA                          | 0.074763        | -0.10236       | 0.055672        | -0.18556        |
| weight                      | 7.36E-05        | -0.00186       | 0.000856        | -0.31764        |
| Ancestry                    | 0.620047        | -0.29839       | 0.965815        | 0.004192        |
| Maternal_smoking            | 0.555081        | -0.16369       | 0.382876        | -0.08521        |
| Maternal_preeclampsia       | 0.40496         | -0.24041       | 0.630895        | -0.04697        |
| Hospital                    | 0.313718        | -0.11835       | 0.249562        | -0.11228        |
| cg05575921                  | 1.34E-05        | -8.14556       | 0.00278         | -0.28644        |
| CD8T                        | 2.83E-05        | -8.53618       | 0.056883        | -0.18467        |
| CD4T                        | 3.23E-07        | -5.45504       | 0.000157        | -0.35747        |
| NK                          | 0.008825        | 24.903         | 0.027422        | 0.213256        |
| Bcell                       | 2.28E-06        | -9.78908       | 0.001181        | -0.30945        |
| Mono                        | 0.004492        | -8.96091       | 0.069374        | -0.17625        |
| Gran                        | 0.077785        | -1.62658       | 0.026505        | -0.21451        |
| nRBC                        | 5.36E-09        | 2.851882       | 0.065833        | 0.178502        |
| percentize_CumulativeDaysO2 | 0.007094        | 1.421932       | 0.001528        | 0.302729        |

**Table S7A. Biological functions and pathways of the genes annotated to the differentially methylated CpG sites (FDR 5%) associated with bronchopulmonary dysplasia (BPD) risk**

Pathways analyzed for 2164 genes annotated to 1581 CpGs (FDR 5%) using Ingenuity Pathway Analysis (IPA), ToppGene Suite (ToppGene), David Functional Annotation (David), and Reactome Pathway Database (Reactome) tools. P value (adjusted) indicates the significance between the number of genes differentially methylated in BPD vs nonBPD and the total number of genes in the enriched ontology, biological functions, associated diseases, or pathways (the lowest P value of similar annotations from pathway analysis tools).

| Functions & pathways                                                                         | P adjusted | Selected enriched genes                                                                                                                                                                                                                                                                                                                                                                                                                                                                                                                                                            | Analysis tools (P resource underlined) |
|----------------------------------------------------------------------------------------------|------------|------------------------------------------------------------------------------------------------------------------------------------------------------------------------------------------------------------------------------------------------------------------------------------------------------------------------------------------------------------------------------------------------------------------------------------------------------------------------------------------------------------------------------------------------------------------------------------|----------------------------------------|
| <b>Cellular morphogenesis, movement and adhesion during development</b>                      |            |                                                                                                                                                                                                                                                                                                                                                                                                                                                                                                                                                                                    |                                        |
| Focal adhesion/homophilic adhesion                                                           | 2.69E-03   | <i>BAD BCAR1 CAV2 CCND1 CDC42 CDH1 CDH5 CDH10 CDH16 CELSR1 CLSTN1 CNTN6 COL4A1 COL4A2 CTNNA2 CTNND1 DOCK1 DIAPH1 EGFR ERBB2 FLT4 FYN HRAS IGSF11 ITGA1 ITGA6 ITGB1 MAPK9 MYLK3 NECTIN4 NPTN PCHD1 PCHD7 PCDHGB4 PCDHGA8 PCDHB5 PCDHGB5 PCDHGB3 PCDHGB2 PCDHGB1 PCDHGA9 PCDHGA7 PCDHGA6 PCDHGA5 PCDHGA4 PCDHGA3 PCDHGA2 PCDHGA1 PDPK1 PGF PPP1CC PRKCB PTEN RASGRF1 ROBO2 SDK1 SDK2LAMB3 THBS1 THBS4 TNXB VAV1</i>                                                                                                                                                                  | <u>ToppGene</u> David IPA              |
| Actin cytoskeleton organization                                                              | 1.74E-05   | <i>ABL2 AGER AKT1 AKT2 ARHGAP12 ARHGAP17 ARHGEF2 ARRB1 BAIAP2 BCAR1 BST1 CDC42 CDH1 CDK5R1 CELSR1 CORO1A CORO7/CORO7-PAM16 CSRP1 DIAPH1 DIAPH3 DLC1 DOCK2 DPYSL2 EDN1 EFNA5 EGFR ENAH EPB41 EPB41L2 EPHA4 ERBB2 EZR GDNF GRK2 HRAS ITGB1 KALRN LRP1 MGAT5 MICALL2 MLST8 MYH9 NCK1 NCK2 NF1 OOE PARVB PDPK1 PHACTR1 PIK3CD PLAU PMP22 PPP1R9B PTPN1 RDX RHOF RND3 RNF5 SFRP1 SHROOM3 SIPA1L1 SORBS1 SPIRE2 TGFB1 TMOD3 TRIO UBQLN1 VAV1 WDRCP</i>                                                                                                                                   | <u>IPA</u> David ToppGene              |
| Cadherin signlaing                                                                           | 1.14E-03   | <i>CDH1 CDH5 CDH10 CDH16 CDHR4 CELSR1 CLSTN1 CTNNA2 CTNND1 EGFR ERBB2 FRK FYN FZD5 PCDHGB4 PCHD1 PCHD7 PCDHGA8 PCDHB5 PTPN1 PCDHGB5 PCDHGB3 PCDHGB2 PCDHGB1 PCDHGA9 PCDHGA7 PCDHGA6 PCDHGA5 PCDHGA4 PCDHGA3 PCDHGA2 PCDHGA1 WNT10A WNT6 WNT2B</i>                                                                                                                                                                                                                                                                                                                                  | <u>ToppGene</u> David                  |
| Wnt signlaing                                                                                | 3.45E-03   | <i>AKT1 AKT2 CCND1 CDH1 CDH5 DKK3 FZD5 KREMEN1 KREMEN2 LRP1 POU5F1 PPP2R5C RUVBL2 SFRP1 SFRP5 SOX15 SOX21 SOX5 SOX6 TAB1 TGFB1 TLE3 UBD WNT10A WNT2B WNT6</i>                                                                                                                                                                                                                                                                                                                                                                                                                      | <u>ToppGene</u> David IPA Reactome     |
| Ephrin singliang                                                                             | 9.00E-02   | <i>BCAR1 CDC42 EFNA2 EFNA3 EFNA5 EFHA4 FYN PIK3C2B PIK3CD PIK3R6 VAV1</i>                                                                                                                                                                                                                                                                                                                                                                                                                                                                                                          | David IPA Reactome                     |
| Abnormal morphogenesis and embryo growing                                                    | 1.13E-02   | <i>AGER AGO2 AHSA1 AKAP13 AKT1 AKT2 ALCAM APBA2 ARID1A ARRB1 BRCA1 CCL17 CCND1 CCR1 CDH1 CDH5 CLASP1 CTNND1 CTSH CYP26B1 DBNL EDN1 EEF2K EGFR ERBB2 FBN2 FOLR1 FOXC1 FOXP1 GREM1 HCRT JPH4 LCK MIR429 MYH3 NCOA1 NCOR2 NF1 NKX3-2 PBX2 PDPK1 PIK3CD PKLR PKM PLAU POLE PTEN PTGER4 RARRES2 RB1 RBPJ RNF19A RNU4A SESN2 SHH SKI STK11 TAC THBS1 VDR ZBTB16 ZC3H12C ZEHY3</i>                                                                                                                                                                                                        | <u>IPA</u> ToppGene David              |
| <b>Lung alveolarization and development</b>                                                  |            |                                                                                                                                                                                                                                                                                                                                                                                                                                                                                                                                                                                    |                                        |
| *Retinoic acid-retinoid X receptor-vitamin D receptor signaling, androgen receptor signaling | 1.70E-02   | <i>ADCY3 ADCY10 AKT1 AKT2 ARID1A ARID5A BRCA1 CCL5 CDC42 COL14A1 CRABP2 CST6 DHRS9 DSTN FHL2 FOXP1 HSD17B3 MAP3K5 MAPK9 NCOA1 NCOA6 NCOR2 NT5C1B NR0B2 PDPK1 PIK3CD PML PRKCB PRKAR1B PTEN RARRES1 RARRES2 RB1 RDH14 RDH5 RELB RUNX2 RXRB TGFB1 VDR ZBTB16</i>                                                                                                                                                                                                                                                                                                                     | <u>ToppGene</u> IPA                    |
| *Lung surfactant metabolism, alveolar epithelial development, glycosaminoglycan metabolism   | 2.90E-02   | <i>AGER AHSA1 ARRB1 CAVIN2 CHST14 CTSH FNDC3B FOXP1 HS6ST1 MIR449A MIR326 NCOR2 RB1 RBPJ SPOCK2</i>                                                                                                                                                                                                                                                                                                                                                                                                                                                                                | <u>IPA</u>                             |
| Quantity of airway cells                                                                     | 2.90E-02   | <i>EPAS1 HOXAS PTEN AP3B1 GLI2 TERT THBS1 STK4 RUNX2</i>                                                                                                                                                                                                                                                                                                                                                                                                                                                                                                                           | <u>IPA</u>                             |
| <b>Hematological system function, immune and inflammation</b>                                |            |                                                                                                                                                                                                                                                                                                                                                                                                                                                                                                                                                                                    |                                        |
| *Platelet activation & coagulation                                                           | 9.91E-03   | <i>AGER AMOTL1 ARRB1 CAVIN2 CDC42 CCL17 DGKA EDN1 GNG2 H3C2 ITGA2B LCK PDK1 PDPK1 PTEN SLC39A5 THBS1</i>                                                                                                                                                                                                                                                                                                                                                                                                                                                                           | <u>IPA</u>                             |
| Angiogenesis and vascular permeability                                                       | 1.01E-02   | <i>AKT1 ALCAM ANGPT2 ARRB1 ATP2B4 BCAS3 CAVIN2 CBLL1 CCN1 CDH1 CDH5 CDC42 CD63 COL18A1 COL4A1 CTBP2 CTNND1 DCL1 DGKA DOCK1 DOCK2 DROSHA EDN1 EEF2K EGFR EGR1 EIF4A3 EPAS1 EPS15 ERBB2 F3 FHL2 FLT4 FOXC1GATA4 GDNF GNG2 GREM1 GRIN2B GRK2 HDAC9 HS6ST1 HOXA5 HRH4 HRAS ID1 IL1B IRX1 ITGA2B ITGB1 PATJ LCK LGALS3 LMNB1 MIR4488 MYH9 NCK1 NF1 NRG1 PDK1 PDPK1 PIK3C2B PKM PLCB3 PLAU PLPP3 PLXND1 PML PRKAA1 PTEN PTPN1 RASA3 RASIP1 RGCC RIPK3 RCAN1 ROBO2 ROBO2 RUNX3 SCGB3A1 SELP SLC39A5 SPINT1 STARD13 STK11 SYNPO2 TAL1 TERC TFAP2A TCFE1 THBS4 TFAD2A THBS1 TRIP1 ZMIZ1</i> | <u>IPA</u> ToppGene David Reactome     |
| Hematopoiesis and leukopoiesis                                                               | 2.19E-02   | <i>AGER AREB1 ARRB1 BAD BRCA1 CD162 CCL17 CCN1 CDC42 CXCL11 CUL4A CYTH3 DAPP1 DCAF1 DGKA FLOT2 FLT3LG FOXP1 GON4L GNG2 IKZF2 LCK mir-326 NF1 NR0B2 PBXIP1 TAL1 PDPK1 PDPK1 PKM PLCB3 PSMB8 PTEN RB1 RBPJ RUNX2 RUNX3 TRPM2 TTC7A UBQLN1 VDR ZBTB16 ZFP36L2</i>                                                                                                                                                                                                                                                                                                                     | <u>IPA</u> DAVID                       |
| Quantity of blood cells                                                                      | 3.87E-05   | <i>ABTB2 AGER ALPL ANK1 ARRB1 ARID1B BAD BCL11A BNIP3L BST1 BTG1 C13orf46 CD40 CD6 CHD8 CLK1 COL4A1 COL4A2 CPS1 CTSA DLK1 EP400 FAM110B IL18RAP KL MAP3K14 MTHFD1 MTH9 P2RX5 STX11 NPAS2 PARVB PCDH7 PHACTR1 PI3CD PKLR PML PPL PRKAA1 PRKCB RASGRP3 REXO2 RGSS RHOF RUNX2 RUNX1T1 RUNX3 SERPINB2 SGMS1 TBC1D22A ZDHHC13 ZFP36L2</i>                                                                                                                                                                                                                                               | <u>ToppGene</u> IPA                    |

| Functions & pathways                                                  |          | P adjusted                                                                                                                                                                                                                                                                                                                                                                                                                                                                                                                                                                                                               | Selected enriched genes     | Analysis tools ( <i>P</i> resource underlined) |
|-----------------------------------------------------------------------|----------|--------------------------------------------------------------------------------------------------------------------------------------------------------------------------------------------------------------------------------------------------------------------------------------------------------------------------------------------------------------------------------------------------------------------------------------------------------------------------------------------------------------------------------------------------------------------------------------------------------------------------|-----------------------------|------------------------------------------------|
| T cell receptor signaling and T cell activation                       | 1.10E-02 | AKT1 AKT2 BAD CCL17 CD6 CDC42 CYP26B1 DOCK2 FYN HLA-DQA2 HRAS IL12RB2 IL15 IL1B IL4 ITGB1 ITPR1 ITPR3 LCK MAPK9 MYH9 PDPK1 PIK3C2B PIK3CD PIK3R6 PPP3CA PPP3R1 RASSF5 RELB RPS6KB1 TGFB1 VAV1                                                                                                                                                                                                                                                                                                                                                                                                                            | ToppGene David Reactome IPA |                                                |
| B cell receptor signaling and B cell viability                        | 8.46E-03 | AKT1 AKT2 BAD CD40 CDC42 CREB3L2 CREB5 DAPP1 EBF1 EGR1 HRAS IKZF2 INPP5J ITPR3 MAP3K14 MAP3K5 MAPK9 MCL1 PDPK1 PIK3CD PIK3C2B PIK3CD PIK3R6 PPP3CA PPP3R1 PRKCB PTEN RASSF5 RELB RIPK3 RPS6KB1 SHH TAC4 TGFB1 TNFSF9 TRAF3 VAV1                                                                                                                                                                                                                                                                                                                                                                                          | IPA ToppGene                |                                                |
| *Enucleation of erythroid precursor cells                             | 1.44E-02 | HIPK2 RB1 MAEA RHAG                                                                                                                                                                                                                                                                                                                                                                                                                                                                                                                                                                                                      | IPA                         |                                                |
| *Megakaryocyte differentiation                                        | 2.09E-02 | AGO2 ALDH16A1 ALDH3A1 CDC42 DOCK2 GNG2 H2AC4 H3C2 ITGA2B KIF1B LCK NCOR2 NEDD8 NR0B2 PSMB8 RB1 THBS1                                                                                                                                                                                                                                                                                                                                                                                                                                                                                                                     |                             |                                                |
| Abnormal morphology of immune cells                                   | 2.41E-02 | AGER ALPL ANK1 ARID1B ATP8B1 BAD BCL11A BECH1 BNIP3L BST1 BTG1 B4GALNT3 CD40 CD6 CDH5 CHD8 CLCN7 CLK1 DLK1 DOCK2 EPS15 FADS2MCL1 FAM110B HSPA12A IL18RAP INPP4B KL MAP3K14 MAP4K3 MTH9 MTHFD1 NLRC3 NPAS2 NPC1 P2RX5 PARVB PCDH7 PHACTR1 PPT2 RGS5 RND3 RUNX2 RUNX1T1 RUNX3 SCARF1 SERPINB2 STK24 STX11 TAC4 TRIP13 UHRF1 VDR ZFP36L2                                                                                                                                                                                                                                                                                    | ToppGene IPA                |                                                |
| Inflammatory cell infiltration and chemokine signaling                | 1.15E-03 | ADAMTS13 ADCY3 ADORA2A AGER AGTRAP AKT1 AKT2 ANGPT2 ARRB1 ATG5 BCAR1 BAD BECN1 BID C2 CCL17 CCL3 CCL5 CCN1 CCNT1 CCR1 CCR3 CD38 CD40 CD6 CDC42 CFB CHRNA9 CKLF CORO1A CXCL11 CYP26B1 DBNL DLK1 DOCK2 EDN1 END2 EGFL7 EGFR EPAS1 ERBB2 EZR F3 FLT3LG GNG2 GJB2 GPR18 GRK2 GRK5 HARS1 HRAS ID1 IGHE IL15 IL18BP IL1B IL4 ITGA1 ITGB1 KAT8 KL LGALS3 LMNB1 MAP3K5 MAP4K3 NCOA2 NFKBIZ NPC1 NR0B2 NR1H3 PARD3 PDE10A PDK1 PGF PIK3CD PLAU PLCB3 PLTP PPT2 PRKAA1 PRKCB PSMB8 PTEN PTGER4 PTPN1 RARRES2 RB1 RELB RGCC RIPK3 RUNX3 S100A12 SELP SERPINE2 SERPING1 SERP1 SLC22A5 STC1 STK11 TERC TGFB1 THBS1 TRPM2 VAV1 VDR WRN | IPA David                   |                                                |
| TNF signaling                                                         | 2.40E-01 | AKT1 AKT2 CCL5 DAB2IP CREB3L2 CREB5 EDN1 IL1B IL15 MAPL9 MAP3K14 MAP3K5 PIK3CD RIPK3 TAB1 TRAF2 TNFSF9                                                                                                                                                                                                                                                                                                                                                                                                                                                                                                                   | David                       |                                                |
| <b>Cell proliferation and differentiation and tissue development</b>  |          |                                                                                                                                                                                                                                                                                                                                                                                                                                                                                                                                                                                                                          |                             |                                                |
| Arrest in cell Cycle progression                                      | 4.58E-05 | BAD BRCA1 C8orf44-SGK3/SGK3 CDC42 FHL2 FLT3LG HIPK2 KLLN LCK MCPH1 mir-193 mir-20 mir-449 NCOR2 PDPK1 PIWIL1 PTEN RB1 RRAGD SKI THBS1 USP42 ZBTB16 PKMYT1 TRIP12 WEE1                                                                                                                                                                                                                                                                                                                                                                                                                                                    | IPA David                   |                                                |
| Muscle, bone, and skeletal system development                         | 1.59E-02 | ADAMTS7 AGER AGTRAP AKAP13 AKT1 ALOX12 AMD1 ANGPT2 ARID5A CCL3 CCND1 CHRM5 CLASP1 CREB3L2 CSRP3 ERBB2 EDN1 EGFR EXT1 F3 FHL2 FOXP1 GAS7 GATA4 GLI2 GPER1 GREM1 GRK5 HRAS HEY2 HOXA4 IL15 ITGA6 ITGB1 KALRN KEL LDB3 MAPK9 MIR193B MIR29B1 MYOZ2 NCOA1 NDRG2 NF1 NKX3-2 NRG1 P2RX5 PDE4D PDPK1 PRKG2 PTEN PTPN1 RARRES2 RASGRF1 RB-SKI RB1 RBPJ RIPK3GRK2 RPSKB1 RUNX2 RUNX3 RXRB SCARB1 SHH SOX5 SOX6 SOX15 STC1 STK11 TERC TERT TGFB1 THBS1 TNFSF9 TRIB1 TRPM2 TRPS1 VDR WNT2B ZBTB16 ZNF609                                                                                                                            | David IPA                   |                                                |
| *Epithelial-mesenchymal transition, extracellular matrix organization | 3.46E-02 | ADAMTS13 ADAMTS7 ALPL BANP BRCA1 BTBD7 CCN1 CDC42 CLASP1 COL21A1 COL4A1 COL4A2 COL5A1 COL13A1 COL18A1 FBN2 FNDC3B ITGA2B IMPG2 LAMB3 LRIG1MATN2 MFAP3L MIR193B MUC6 NCOA1 OPTC OTOGL PDPK1 PHLDB2 PRELP PTEN RASSES2 RB1 RBPJ SPOCK2 SPON2 SLC25A33 TFIP11 TGFB1 THBS1 THSD4 TNXB UBQLN1 VEPH1 WNT6                                                                                                                                                                                                                                                                                                                      | IPA David                   |                                                |
| Neurogenesis                                                          | 9.46E-07 | ABL2 AGER ADORA2A AKT1 AKT2 ALCAM APBB1 ARF4 ARHGEF2 ARIDB ATP8B1 ASCL2 BCL11A BECN1 BEND6 CAPZB CCK CD38 CDC42 CDH1 CDK5R1 CPNE5 CREB3L2 CREB5 DBNL DST EGR1 F3 FEZF1 GAS7 GPC2 GPR37L1 GRK2 HRAS HIPK2 ID1 ISLR2 KALRN KIF1A MAP3K14 MAP3K MAP3K5 MAPK9MATN2 MDGA1 NCK1 NCK2 NCOA1 NEUROD4 NF1 NKX6-1 NRBP2 NRP2 OPCML PBX2 PDPK1 PHACTR1 PIK3C2B PIK3CD PIK3R6 PLPP3 RAB11A RELB RPS6KA2 RPS6KB1 RPS6KC1 RRAD RUNX2 RUNX3 SCARF1 SDK1 SERPINE2 SH3RF1 STK24 SPTBN4 TCF12 TM67 TRIP1 TRIO UNC5C VGF ZFH3 ZSWIM6                                                                                                        | David IPA Reactome          |                                                |
| Oxygen-induced retinopathy and other retinal disorders                | 2.89E-02 | CAVIN2 CCN1 CLK EBF1 EBF2 EBF3 FJX1 HIPK2 IGFN1 LCK PTEN RB1 RBPJ PTF1A SDK1 SDK2 TFAP2A                                                                                                                                                                                                                                                                                                                                                                                                                                                                                                                                 | IPA David                   |                                                |
| Hearing loss and inner ear development                                | 1.20E-02 | ABCC1 CD164 LHFP15 LMX1A POU4F3 ARSG CRYM DIAPH1 DIAPH3 EXOSC2 FOXC1 GJB2 GJB6 LRTOMT MYH9 OTOF OTOGL PMP22 KCNE1 KCNQ1 PTPRQ P2RX2 RDX SPTBN4 TRMU TSPEAR TMEM67 SLC12A7 IDUA LRTOMT                                                                                                                                                                                                                                                                                                                                                                                                                                    | IPA ToppGene David          |                                                |
| <b>Others</b>                                                         |          |                                                                                                                                                                                                                                                                                                                                                                                                                                                                                                                                                                                                                          |                             |                                                |
| Oxidative stress and xenobiotic metabolism signaling                  | 3.59E-02 | ABCC1 AGER AGTRAP AKT1 ALDH16A1 ANGPT2 BRCA1 CHST14 CCL5 CCN1 CDC42 CDH5 CHST2 CUL3 DHRS9 DOCK2 DNAJA4 DNAJC6 DNAJB1 DNAJB12 DNAJB13 DNAJC14 EDN1 HRAS HS6ST1 IL1B LCK MAP3K3 MAP3K5 MAP3K14 MAPK9 NCOA1 NCOR2 PDK1 PIK3C2B PIK3CD PIK3R6 PLCB3 PNKP PPP2R5C PSMB8 PTEN PRKCB RARRES2 RELB RB1 RRBPI SCARB1 SLC25A33 TOP1 TRPM2 UBQLN1 UGT1A6 UGT1A9 UST VDR                                                                                                                                                                                                                                                             | IPA                         |                                                |

| Functions & pathways |                                                     | P adjusted | Selected enriched genes                                                                                                                                                                                           | Analysis tools (P resource underlined) |
|----------------------|-----------------------------------------------------|------------|-------------------------------------------------------------------------------------------------------------------------------------------------------------------------------------------------------------------|----------------------------------------|
|                      | Lipid (steroid, fatty acid, cholesterol) metabolism | 8.20E-03   | ACAD11 ACSF3 ACSL1 ACSL6 ALDH3A1 ALOX12 BRCA1 CAP CBR4 CPT1B CYP7B1 CYP11A1 CYP8B1 DHRS9 ELOVL7 FADS2 GCDH HACL1 HMGCR HMGCS2 HSD17B8 LBR MSMO1 NPC1 PRKAA1 PTGIS SOAT1 SPMVKSLC27A3 TECR                         | <u>David</u> IPA Reactome              |
|                      | *Mitochondria function and glucose deprivation      | 4.35E-02   | AGER AGTRAP AKT1 ALDH3A1 ANGPT2 ARID1A CAV2 CD40 COX10 DNAJB1 EDN1 EEF2K EPAS1 GHSR HIPK2 MAPK9 MDH1 MRPL14 NF1 PDK1 PKLR PKM PPP1R1B PSMB8 PTEN RBPJ RHAG SLC25A26 SLC25A33 TERC TGFB1 THBS1 TOMM7 UBQLN1 ZBTB16 | <u>IPA</u> ToppGene                    |

\*Pathways enriched strongly in 386 genes annotaed with 275 CpGs cut at FDR1 %.

Table S7B. GOMeth analysis of Gene Ontology (GO)-enriched pathways for annotated genes in bronchopulmonary dysplasia (BPD) epigenome.

N=number of genes in GO term, DE=number of annotated genes in the differentially methylated CpGs, P.DE= value for over-representation of the GO term, FDR=false discovery rate.

| FDR 1% Gene GO Term | ONTOLOGY | TERM                                                                                | N   | DE | P.DE     | FDR | FDR 5% Gene GO Term | ONTOLOGY | TERM                                                                             | N   | DE | P.DE     | FDR      |
|---------------------|----------|-------------------------------------------------------------------------------------|-----|----|----------|-----|---------------------|----------|----------------------------------------------------------------------------------|-----|----|----------|----------|
| GO:0046965          | MF       | retinoid X receptor binding                                                         | 17  | 4  | 9.43E-05 | 1   | GO:0019903          | MF       | protein phosphatase binding                                                      | 146 | 26 | 2.73E-05 | 0.618695 |
| GO:0035371          | CC       | microtubule plus-end                                                                | 23  | 4  | 0.000361 | 1   | GO:0030036          | BP       | actin cytoskeleton organization                                                  | 678 | 82 | 9.63E-05 | 1        |
| GO:0042974          | MF       | retinoic acid receptor binding                                                      | 26  | 4  | 0.000484 | 1   | GO:0019902          | MF       | phosphatase binding                                                              | 192 | 29 | 0.000219 | 1        |
| GO:0044849          | BP       | estrous cycle                                                                       | 16  | 3  | 0.001239 | 1   | GO:0099170          | BP       | postsynaptic modulation of chemical synaptic transmission                        | 15  | 6  | 0.000586 | 1        |
| GO:1990752          | CC       | microtubule end                                                                     | 33  | 4  | 0.001361 | 1   | GO:0030029          | BP       | actin filament-based process                                                     | 760 | 85 | 0.000924 | 1        |
| GO:0030331          | MF       | estrogen receptor binding                                                           | 41  | 4  | 0.001467 | 1   | GO:0097435          | BP       | supramolecular fiber organization                                                | 703 | 76 | 0.001285 | 1        |
| GO:0006903          | BP       | vesicle targeting                                                                   | 44  | 4  | 0.002069 | 1   | GO:0007015          | BP       | actin filament organization                                                      | 419 | 51 | 0.00129  | 1        |
| GO:0140297          | MF       | DNA-binding transcription factor binding                                            | 373 | 13 | 0.00222  | 1   | GO:0051721          | MF       | protein phosphatase 2A binding                                                   | 30  | 8  | 0.001519 | 1        |
| GO:0016922          | MF       | nuclear receptor binding                                                            | 139 | 7  | 0.002591 | 1   | GO:0036473          | BP       | cell death in response to oxidative stress                                       | 90  | 14 | 0.001864 | 1        |
| GO:0002089          | BP       | lens morphogenesis in camera-type eye                                               | 21  | 3  | 0.004538 | 1   | GO:0098685          | CC       | Schaffer collateral - CA1 synapse                                                | 74  | 15 | 0.002023 | 1        |
| GO:0035254          | MF       | glutamate receptor binding                                                          | 44  | 4  | 0.004696 | 1   | GO:0022011          | BP       | myelination in peripheral nervous system                                         | 29  | 8  | 0.002213 | 1        |
| GO:0035023          | BP       | regulation of Rho protein signal transduction                                       | 79  | 5  | 0.005574 | 1   | GO:0032292          | BP       | peripheral nervous system axon ensheathment                                      | 29  | 8  | 0.002213 | 1        |
| GO:0007584          | BP       | response to nutrient                                                                | 165 | 7  | 0.005752 | 1   | GO:0032956          | BP       | regulation of actin cytoskeleton organization                                    | 342 | 41 | 0.002392 | 1        |
| GO:0007274          | BP       | neuromuscular synaptic transmission                                                 | 25  | 3  | 0.005897 | 1   | GO:0072522          | BP       | purine-containing compound biosynthetic process                                  | 185 | 23 | 0.002487 | 1        |
| GO:0035255          | MF       | ionotropic glutamate receptor binding                                               | 24  | 3  | 0.00645  | 1   | GO:0030295          | MF       | protein kinase activator activity                                                | 93  | 15 | 0.002872 | 1        |
| GO:0099023          | CC       | vesicle tethering complex                                                           | 60  | 4  | 0.006648 | 1   | GO:0014044          | BP       | Schwann cell development                                                         | 31  | 8  | 0.003263 | 1        |
| GO:0007266          | BP       | Rho protein signal transduction                                                     | 127 | 6  | 0.008305 | 1   | GO:0032970          | BP       | regulation of actin filament-based process                                       | 379 | 44 | 0.004038 | 1        |
| GO:0000184          | BP       | nuclear-transcribed mRNA catabolic process, nonsense-mediated decay                 | 35  | 3  | 0.009723 | 1   | GO:0019209          | MF       | kinase activator activity                                                        | 99  | 15 | 0.004098 | 1        |
| GO:0031398          | BP       | positive regulation of protein ubiquitination                                       | 109 | 5  | 0.010309 | 1   | GO:0007254          | BP       | JNK cascade                                                                      | 160 | 22 | 0.004437 | 1        |
| GO:0042698          | BP       | ovulation cycle                                                                     | 68  | 4  | 0.010447 | 1   | GO:0060964          | BP       | regulation of gene silencing by miRNA                                            | 47  | 10 | 0.004533 | 1        |
| GO:0000956          | BP       | nuclear-transcribed mRNA catabolic process                                          | 109 | 5  | 0.010536 | 1   | GO:0048016          | BP       | inositol phosphate-mediated signaling                                            | 55  | 11 | 0.004698 | 1        |
| GO:0045807          | BP       | positive regulation of endocytosis                                                  | 96  | 5  | 0.010872 | 1   | GO:0036490          | BP       | regulation of translation in response to endoplasmic reticulum stress            | 10  | 4  | 0.005476 | 1        |
| GO:0003714          | MF       | transcription corepressor activity                                                  | 172 | 7  | 0.011446 | 1   | GO:0098945          | CC       | intrinsic component of presynaptic active zone membrane                          | 16  | 5  | 0.006137 | 1        |
| GO:0070884          | BP       | regulation of calcineurin-NFAT signaling cascade                                    | 34  | 3  | 0.011556 | 1   | GO:0060147          | BP       | regulation of posttranscriptional gene silencing                                 | 50  | 10 | 0.006325 | 1        |
| GO:0006897          | BP       | endocytosis                                                                         | 537 | 14 | 0.012084 | 1   | GO:0006164          | BP       | purine nucleotide biosynthetic process                                           | 176 | 21 | 0.006415 | 1        |
| GO:0008134          | MF       | transcription factor binding                                                        | 550 | 15 | 0.012116 | 1   | GO:0060966          | BP       | regulation of gene silencing by RNA                                              | 51  | 10 | 0.006935 | 1        |
| GO:0106056          | BP       | regulation of calcineurin-mediated signaling                                        | 35  | 3  | 0.013087 | 1   | GO:0042110          | BP       | T cell activation                                                                | 460 | 45 | 0.007084 | 1        |
| GO:0055072          | BP       | iron ion homeostasis                                                                | 76  | 4  | 0.013504 | 1   | GO:0051865          | BP       | protein autoubiquitination                                                       | 71  | 11 | 0.007104 | 1        |
| GO:0050775          | BP       | positive regulation of dendrite morphogenesis                                       | 32  | 3  | 0.013545 | 1   | GO:0060965          | BP       | negative regulation of gene silencing by miRNA                                   | 21  | 6  | 0.007259 | 1        |
| GO:0031670          | BP       | cellular response to nutrient                                                       | 43  | 3  | 0.014128 | 1   | GO:0005096          | MF       | GTPase activator activity                                                        | 424 | 48 | 0.007329 | 1        |
| GO:0097028          | BP       | dendritic cell differentiation                                                      | 44  | 3  | 0.015885 | 1   | GO:0016358          | BP       | dendrite development                                                             | 226 | 31 | 0.007695 | 1        |
| GO:0061629          | MF       | RNA polymerase II-specific DNA-binding transcription factor binding                 | 288 | 9  | 0.016584 | 1   | GO:0035023          | BP       | regulation of Rho protein signal transduction                                    | 79  | 13 | 0.008069 | 1        |
| GO:0007595          | BP       | lactation                                                                           | 42  | 3  | 0.017036 | 1   | GO:0030695          | MF       | GTPase regulator activity                                                        | 449 | 50 | 0.008168 | 1        |
| GO:0031593          | MF       | polyubiquitin modification-dependent protein binding                                | 47  | 3  | 0.017831 | 1   | GO:0060589          | MF       | nucleoside-triphosphatase regulator activity                                     | 449 | 50 | 0.008168 | 1        |
| GO:0030038          | BP       | contractile actin filament bundle assembly                                          | 103 | 5  | 0.018113 | 1   | GO:0034599          | BP       | cellular response to oxidative stress                                            | 276 | 30 | 0.008175 | 1        |
| GO:0043149          | BP       | stress fiber assembly                                                               | 103 | 5  | 0.018113 | 1   | GO:0009895          | BP       | negative regulation of catabolic process                                         | 294 | 33 | 0.008313 | 1        |
| GO:0071674          | BP       | mononuclear cell migration                                                          | 187 | 6  | 0.018491 | 1   | GO:1903799          | BP       | negative regulation of production of miRNAs involved in gene silencing by miR    | 15  | 5  | 0.008758 | 1        |
| GO:1903322          | BP       | positive regulation of protein modification by small protein conjugation or removal | 128 | 5  | 0.019862 | 1   | GO:0005942          | CC       | phosphatidylinositol 3-kinase complex                                            | 26  | 6  | 0.00878  | 1        |
| GO:0030100          | BP       | regulation of endocytosis                                                           | 204 | 7  | 0.02031  | 1   | GO:0035091          | MF       | phosphatidylinositol binding                                                     | 259 | 31 | 0.009058 | 1        |
| GO:0031032          | BP       | actomyosin structure organization                                                   | 192 | 7  | 0.020866 | 1   | GO:0098858          | CC       | actin-based cell projection                                                      | 212 | 27 | 0.00921  | 1        |
| GO:0030036          | BP       | actin cytoskeleton organization                                                     | 678 | 17 | 0.02088  | 1   | GO:0046965          | MF       | retinoid X receptor binding                                                      | 17  | 5  | 0.009444 | 1        |
| GO:0006414          | BP       | translational elongation                                                            | 53  | 3  | 0.021575 | 1   | GO:0046328          | BP       | regulation of JNK cascade                                                        | 130 | 18 | 0.00961  | 1        |
| GO:0003712          | MF       | transcription coregulator activity                                                  | 451 | 12 | 0.021978 | 1   | GO:0031330          | BP       | negative regulation of cellular catabolic process                                | 238 | 27 | 0.009862 | 1        |
| GO:0042982          | BP       | amyloid precursor protein metabolic process                                         | 90  | 4  | 0.022125 | 1   | GO:0120016          | MF       | sphingolipid transfer activity                                                   | 10  | 3  | 0.010404 | 1        |
| GO:0016567          | BP       | protein ubiquitination                                                              | 751 | 16 | 0.022593 | 1   | GO:0099059          | CC       | integral component of presynaptic active zone membrane                           | 12  | 4  | 0.010451 | 1        |
| GO:0030863          | CC       | cortical cytoskeleton                                                               | 102 | 5  | 0.02358  | 1   | GO:0060149          | BP       | negative regulation of posttranscriptional gene silencing                        | 23  | 6  | 0.010478 | 1        |
| GO:0010770          | BP       | positive regulation of cell morphogenesis involved in differentiation               | 73  | 4  | 0.024196 | 1   | GO:0060967          | BP       | negative regulation of gene silencing by RNA                                     | 23  | 6  | 0.010478 | 1        |
| GO:0033173          | BP       | calcineurin-NFAT signaling cascade                                                  | 43  | 3  | 0.025135 | 1   | GO:0030296          | MF       | protein tyrosine kinase activator activity                                       | 18  | 5  | 0.010566 | 1        |
| GO:1902991          | BP       | regulation of amyloid precursor protein catabolic process                           | 53  | 3  | 0.02624  | 1   | GO:0045214          | BP       | sarcomere organization                                                           | 42  | 8  | 0.010598 | 1        |
| GO:0009988          | BP       | cell-cell recognition                                                               | 67  | 3  | 0.027023 | 1   | GO:0048813          | BP       | dendrite morphogenesis                                                           | 135 | 21 | 0.010747 | 1        |
| GO:0000122          | BP       | negative regulation of transcription by RNA polymerase II                           | 831 | 19 | 0.029045 | 1   | GO:1903201          | BP       | regulation of oxidative stress-induced cell death                                | 69  | 10 | 0.010861 | 1        |
| GO:0051017          | BP       | actin filament bundle assembly                                                      | 152 | 6  | 0.029479 | 1   | GO:0046649          | BP       | lymphocyte activation                                                            | 658 | 60 | 0.011387 | 1        |
| GO:0030864          | CC       | cortical actin cytoskeleton                                                         | 75  | 4  | 0.029708 | 1   | GO:0001931          | CC       | uropod                                                                           | 12  | 4  | 0.011899 | 1        |
| GO:0007265          | BP       | Ras protein signal transduction                                                     | 314 | 9  | 0.031445 | 1   | GO:0031254          | CC       | cell trailing edge                                                               | 12  | 4  | 0.011899 | 1        |
| GO:0061572          | BP       | actin filament bundle organization                                                  | 155 | 6  | 0.032606 | 1   | GO:1902187          | BP       | negative regulation of viral release from host cell                              | 13  | 4  | 0.012093 | 1        |
| GO:0097720          | BP       | calcineurin-mediated signaling                                                      | 48  | 3  | 0.032935 | 1   | GO:0050848          | BP       | regulation of calcium-mediated signaling                                         | 71  | 11 | 0.0123   | 1        |
| GO:0051489          | BP       | regulation of filopodium assembly                                                   | 44  | 3  | 0.035038 | 1   | GO:1902959          | BP       | regulation of aspartic-type endopeptidase activity involved in amyloid precursor | 10  | 4  | 0.012329 | 1        |
| GO:0006898          | BP       | receptor-mediated endocytosis                                                       | 235 | 7  | 0.036588 | 1   | GO:0008154          | BP       | actin polymerization or depolymerization                                         | 206 | 25 | 0.012546 | 1        |
| GO:0097435          | BP       | supramolecular fiber organization                                                   | 703 | 16 | 0.037159 | 1   | GO:0098641          | MF       | cadherin binding involved in cell-cell adhesion                                  | 18  | 5  | 0.01255  | 1        |
| GO:0048511          | BP       | rhythmic process                                                                    | 289 | 8  | 0.038668 | 1   | GO:1902186          | BP       | regulation of viral release from host cell                                       | 25  | 6  | 0.012793 | 1        |
| GO:0032446          | BP       | protein modification by small protein conjugation                                   | 805 | 16 | 0.039868 | 1   | GO:0007163          | BP       | establishment or maintenance of cell polarity                                    | 212 | 27 | 0.012866 | 1        |
| GO:0016604          | CC       | nuclear body                                                                        | 782 | 16 | 0.040734 | 1   | GO:0001772          | CC       | immunological synapse                                                            | 44  | 8  | 0.013312 | 1        |
| GO:0051402          | BP       | neuron apoptotic process                                                            | 234 | 7  | 0.040929 | 1   | GO:0045296          | MF       | cadherin binding                                                                 | 325 | 36 | 0.013503 | 1        |
| GO:0030514          | BP       | negative regulation of BMP signaling pathway                                        | 49  | 3  | 0.041161 | 1   | GO:0051493          | BP       | regulation of cytoskeleton organization                                          | 500 | 51 | 0.013615 | 1        |
| GO:0043388          | BP       | positive regulation of DNA binding                                                  | 56  | 3  | 0.041592 | 1   | GO:0042974          | MF       | retinoic acid receptor binding                                                   | 26  | 6  | 0.014049 | 1        |
| GO:0099072          | BP       | regulation of postsynaptic membrane neurotransmitter receptor levels                | 56  | 3  | 0.043185 | 1   | GO:0005938          | CC       | cell cortex                                                                      | 298 | 36 | 0.01415  | 1        |
| GO:0042987          | BP       | amyloid precursor protein catabolic process                                         | 66  | 3  | 0.043557 | 1   | GO:0043087          | BP       | regulation of GTPase activity                                                    | 325 | 37 | 0.014236 | 1        |
| GO:0005096          | MF       | GTPase activator activity                                                           | 424 | 11 | 0.044254 | 1   | GO:0050849          | BP       | negative regulation of calcium-mediated signaling                                | 21  | 5  | 0.014583 | 1        |
| GO:0046631          | BP       | alpha-beta T cell activation                                                        | 148 | 5  | 0.044861 | 1   | GO:0014037          | BP       | Schwann cell differentiation                                                     | 39  | 8  | 0.015014 | 1        |

| FDR 1% Gene GO Term | ONTOLOGY | TERM                                                         | N   | DE | P.DE     | FDR |
|---------------------|----------|--------------------------------------------------------------|-----|----|----------|-----|
| GO:0016605          | CC       | PML body                                                     | 98  | 4  | 0.045297 | 1   |
| GO:0010769          | BP       | regulation of cell morphogenesis involved in differentiation | 90  | 4  | 0.045424 | 1   |
| GO:0031122          | BP       | cytoplasmic microtubule organization                         | 56  | 3  | 0.045473 | 1   |
| GO:0070997          | BP       | neuron death                                                 | 347 | 9  | 0.045639 | 1   |
| GO:0046579          | BP       | positive regulation of Ras protein signal transduction       | 58  | 3  | 0.046541 | 1   |
| GO:0006513          | BP       | protein monoubiquitination                                   | 64  | 3  | 0.049028 | 1   |
| GO:0048016          | BP       | inositol phosphate-mediated signaling                        | 55  | 3  | 0.049861 | 1   |

| FDR 5% Gene GO Term | ONTOLOGY | TERM                                                                    | N   | DE | P.DE     | FDR |
|---------------------|----------|-------------------------------------------------------------------------|-----|----|----------|-----|
| GO:0035672          | BP       | oligopeptide transmembrane transport                                    | 14  | 4  | 0.015169 | 1   |
| GO:0016311          | BP       | dephosphorylation                                                       | 397 | 40 | 0.015206 | 1   |
| GO:0030041          | BP       | actin filament polymerization                                           | 180 | 22 | 0.015564 | 1   |
| GO:0005858          | CC       | axonemal dynein complex                                                 | 23  | 5  | 0.015807 | 1   |
| GO:0051056          | BP       | regulation of small GTPase mediated signal transduction                 | 281 | 34 | 0.015981 | 1   |
| GO:0030027          | CC       | lamellipodium                                                           | 195 | 25 | 0.016108 | 1   |
| GO:1905244          | BP       | regulation of modification of synaptic structure                        | 12  | 4  | 0.016563 | 1   |
| GO:0050773          | BP       | regulation of dendrite development                                      | 95  | 15 | 0.016624 | 1   |
| GO:0005543          | MF       | phospholipid binding                                                    | 440 | 45 | 0.017872 | 1   |
| GO:1903798          | BP       | regulation of production of miRNAs involved in gene silencing by miRNA  | 25  | 6  | 0.018336 | 1   |
| GO:0060969          | BP       | negative regulation of gene silencing                                   | 27  | 6  | 0.018532 | 1   |
| GO:1903901          | BP       | negative regulation of viral life cycle                                 | 23  | 5  | 0.018726 | 1   |
| GO:0009152          | BP       | purine ribonucleotide biosynthetic process                              | 157 | 18 | 0.018759 | 1   |
| GO:0060343          | BP       | trabecula formation                                                     | 22  | 5  | 0.018842 | 1   |
| GO:0043525          | BP       | positive regulation of neuron apoptotic process                         | 55  | 9  | 0.019129 | 1   |
| GO:0033866          | BP       | nucleoside bisphosphate biosynthetic process                            | 56  | 9  | 0.019175 | 1   |
| GO:0034030          | BP       | ribonucleoside bisphosphate biosynthetic process                        | 56  | 9  | 0.019175 | 1   |
| GO:0034033          | BP       | purine nucleoside bisphosphate biosynthetic process                     | 56  | 9  | 0.019175 | 1   |
| GO:0009894          | BP       | regulation of catabolic process                                         | 903 | 80 | 0.019307 | 1   |
| GO:0009165          | BP       | nucleotide biosynthetic process                                         | 235 | 24 | 0.019445 | 1   |
| GO:0070920          | BP       | regulation of production of small RNA involved in gene silencing by RNA | 26  | 6  | 0.019498 | 1   |
| GO:1905245          | BP       | regulation of aspartic-type peptidase activity                          | 12  | 4  | 0.019869 | 1   |
| GO:0033173          | BP       | calcineurin-NFAT signaling cascade                                      | 43  | 8  | 0.020122 | 1   |
| GO:0035196          | BP       | production of miRNAs involved in gene silencing by miRNA                | 51  | 9  | 0.020152 | 1   |
| GO:0005911          | CC       | cell-cell junction                                                      | 469 | 49 | 0.020192 | 1   |
| GO:1901293          | BP       | nucleoside phosphate biosynthetic process                               | 237 | 24 | 0.020826 | 1   |
| GO:0072677          | BP       | eosinophil migration                                                    | 23  | 4  | 0.021417 | 1   |
| GO:0071364          | BP       | cellular response to epidermal growth factor stimulus                   | 44  | 8  | 0.021619 | 1   |
| GO:0004674          | MF       | protein serine/threonine kinase activity                                | 358 | 39 | 0.022174 | 1   |
| GO:0120014          | MF       | phospholipid transfer activity                                          | 24  | 5  | 0.022208 | 1   |
| GO:0097001          | MF       | ceramide binding                                                        | 20  | 4  | 0.022223 | 1   |
| GO:0031050          | BP       | dsRNA processing                                                        | 53  | 9  | 0.022459 | 1   |
| GO:0070918          | BP       | production of small RNA involved in gene silencing by RNA               | 53  | 9  | 0.022459 | 1   |
| GO:0010975          | BP       | regulation of neuron projection development                             | 421 | 48 | 0.022599 | 1   |
| GO:0006857          | BP       | oligopeptide transport                                                  | 16  | 4  | 0.02261  | 1   |
| GO:0035024          | BP       | negative regulation of Rho protein signal transduction                  | 22  | 5  | 0.022914 | 1   |
| GO:0003712          | MF       | transcription coregulator activity                                      | 451 | 46 | 0.023006 | 1   |
| GO:0070997          | BP       | neuron death                                                            | 347 | 36 | 0.024522 | 1   |
| GO:0031338          | BP       | regulation of vesicle fusion                                            | 23  | 5  | 0.024681 | 1   |
| GO:0034695          | BP       | response to prostaglandin E                                             | 22  | 5  | 0.025099 | 1   |
| GO:0051020          | MF       | GTPase binding                                                          | 273 | 30 | 0.025614 | 1   |
| GO:0051959          | MF       | dynein light intermediate chain binding                                 | 27  | 6  | 0.026078 | 1   |
| GO:0007264          | BP       | small GTPase mediated signal transduction                               | 470 | 49 | 0.02626  | 1   |
| GO:0060996          | BP       | dendritic spine development                                             | 88  | 14 | 0.026294 | 1   |
| GO:1903203          | BP       | regulation of oxidative stress-induced neuron death                     | 26  | 5  | 0.02691  | 1   |
| GO:0007601          | BP       | visual perception                                                       | 200 | 21 | 0.026925 | 1   |
| GO:0047676          | MF       | arachidonate-CoA ligase activity                                        | 10  | 3  | 0.027004 | 1   |
| GO:0051015          | MF       | actin filament binding                                                  | 207 | 26 | 0.027088 | 1   |
| GO:0051402          | BP       | neuron apoptotic process                                                | 234 | 26 | 0.027249 | 1   |
| GO:0045123          | BP       | cellular extravasation                                                  | 68  | 9  | 0.027257 | 1   |
| GO:0007171          | BP       | activation of transmembrane receptor protein tyrosine kinase activity   | 14  | 4  | 0.027494 | 1   |
| GO:0099092          | CC       | postsynaptic density, intracellular component                           | 13  | 4  | 0.027837 | 1   |
| GO:0006903          | BP       | vesicle targeting                                                       | 44  | 7  | 0.027923 | 1   |
| GO:0007229          | BP       | integrin-mediated signaling pathway                                     | 104 | 14 | 0.027995 | 1   |
| GO:0051258          | BP       | protein polymerization                                                  | 281 | 30 | 0.028137 | 1   |
| GO:0015645          | MF       | fatty acid ligase activity                                              | 20  | 4  | 0.028205 | 1   |
| GO:0031267          | MF       | small GTPase binding                                                    | 242 | 27 | 0.028267 | 1   |
| GO:0071391          | BP       | cellular response to estrogen stimulus                                  | 15  | 4  | 0.028785 | 1   |
| GO:0062197          | BP       | cellular response to chemical stress                                    | 323 | 32 | 0.028831 | 1   |
| GO:0042440          | BP       | pigment metabolic process                                               | 76  | 9  | 0.029565 | 1   |
| GO:0007266          | BP       | Rho protein signal transduction                                         | 127 | 16 | 0.029586 | 1   |
| GO:1903897          | BP       | regulation of PERK-mediated unfolded protein response                   | 11  | 3  | 0.029651 | 1   |
| GO:0046949          | BP       | fatty-acyl-CoA biosynthetic process                                     | 23  | 5  | 0.030091 | 1   |
| GO:0016567          | BP       | protein ubiquitination                                                  | 751 | 64 | 0.030249 | 1   |
| GO:1905898          | BP       | positive regulation of response to endoplasmic reticulum stress         | 33  | 6  | 0.030568 | 1   |
| GO:0070849          | BP       | response to epidermal growth factor                                     | 48  | 8  | 0.030642 | 1   |
| GO:1902905          | BP       | positive regulation of supramolecular fiber organization                | 204 | 23 | 0.030848 | 1   |
| GO:0030163          | BP       | protein catabolic process                                               | 891 | 75 | 0.031111 | 1   |
| GO:1901570          | BP       | fatty acid derivative biosynthetic process                              | 43  | 7  | 0.031207 | 1   |
| GO:0099563          | BP       | modification of synaptic structure                                      | 21  | 5  | 0.031258 | 1   |
| GO:0009260          | BP       | ribonucleotide biosynthetic process                                     | 168 | 18 | 0.031287 | 1   |

| FDR 1% Gene GO Term | ONTOLOGY | TERM                                                                 | N   | DE | P.DE     | FDR |
|---------------------|----------|----------------------------------------------------------------------|-----|----|----------|-----|
| GO:0030217          | BP       | T cell differentiation                                               | 251 | 26 | 0.031573 | 1   |
| GO:0030863          | CC       | cortical cytoskeleton                                                | 102 | 15 | 0.031811 | 1   |
| GO:0051249          | BP       | regulation of lymphocyte activation                                  | 422 | 38 | 0.031814 | 1   |
| GO:0032446          | BP       | protein modification by small protein conjugation                    | 805 | 68 | 0.031988 | 1   |
| GO:0046330          | BP       | positive regulation of JNK cascade                                   | 86  | 12 | 0.032036 | 1   |
| GO:0046174          | BP       | polyol catabolic process                                             | 25  | 5  | 0.032076 | 1   |
| GO:0045176          | BP       | apical protein localization                                          | 14  | 4  | 0.032094 | 1   |
| GO:0099522          | CC       | cytosolic region                                                     | 21  | 5  | 0.032225 | 1   |
| GO:0050953          | BP       | sensory perception of light stimulus                                 | 204 | 21 | 0.032403 | 1   |
| GO:0010976          | BP       | positive regulation of neuron projection development                 | 154 | 19 | 0.032564 | 1   |
| GO:0071347          | BP       | cellular response to interleukin-1                                   | 109 | 11 | 0.032626 | 1   |
| GO:0030275          | MF       | LRR domain binding                                                   | 17  | 4  | 0.032667 | 1   |
| GO:1901216          | BP       | positive regulation of neuron death                                  | 93  | 13 | 0.032679 | 1   |
| GO:0098631          | MF       | cell adhesion mediator activity                                      | 58  | 9  | 0.032728 | 1   |
| GO:0046875          | MF       | ephrin receptor binding                                              | 27  | 6  | 0.032839 | 1   |
| GO:0060997          | BP       | dendritic spine morphogenesis                                        | 55  | 10 | 0.032937 | 1   |
| GO:0097484          | BP       | dendrite extension                                                   | 35  | 7  | 0.033116 | 1   |
| GO:0071380          | BP       | cellular response to prostaglandin E stimulus                        | 14  | 4  | 0.033156 | 1   |
| GO:0044272          | BP       | sulfur compound biosynthetic process                                 | 138 | 16 | 0.033195 | 1   |
| GO:0014075          | BP       | response to amine                                                    | 48  | 7  | 0.033216 | 1   |
| GO:0010918          | BP       | positive regulation of mitochondrial membrane potential              | 11  | 3  | 0.033581 | 1   |
| GO:0060295          | BP       | regulation of cilium movement involved in cell motility              | 24  | 4  | 0.03409  | 1   |
| GO:1902019          | BP       | regulation of cilium-dependent cell motility                         | 24  | 4  | 0.03409  | 1   |
| GO:0019076          | BP       | viral release from host cell                                         | 32  | 6  | 0.034124 | 1   |
| GO:0035890          | BP       | exit from host                                                       | 32  | 6  | 0.034124 | 1   |
| GO:0035891          | BP       | exit from host cell                                                  | 32  | 6  | 0.034124 | 1   |
| GO:1902882          | BP       | regulation of response to oxidative stress                           | 91  | 11 | 0.034289 | 1   |
| GO:0016878          | MF       | acid-thiol ligase activity                                           | 29  | 5  | 0.034857 | 1   |
| GO:0097720          | BP       | calcineurin-mediated signaling                                       | 48  | 8  | 0.035262 | 1   |
| GO:1902903          | BP       | regulation of supramolecular fiber organization                      | 361 | 37 | 0.035302 | 1   |
| GO:0005158          | MF       | insulin receptor binding                                             | 22  | 5  | 0.035335 | 1   |
| GO:0003779          | MF       | actin binding                                                        | 415 | 45 | 0.035917 | 1   |
| GO:1904680          | MF       | peptide transmembrane transporter activity                           | 15  | 4  | 0.036301 | 1   |
| GO:0030175          | CC       | filopodium                                                           | 101 | 14 | 0.036806 | 1   |
| GO:0042176          | BP       | regulation of protein catabolic process                              | 367 | 36 | 0.036889 | 1   |
| GO:0042177          | BP       | negative regulation of protein catabolic process                     | 111 | 14 | 0.037044 | 1   |
| GO:0010998          | BP       | regulation of translational initiation by eIF2 alpha phosphorylation | 10  | 3  | 0.037221 | 1   |
| GO:0045505          | MF       | dynein intermediate chain binding                                    | 32  | 6  | 0.037336 | 1   |
| GO:0097386          | CC       | glial cell projection                                                | 32  | 6  | 0.038029 | 1   |
| GO:1900407          | BP       | regulation of cellular response to oxidative stress                  | 82  | 10 | 0.038131 | 1   |
| GO:0035148          | BP       | tube formation                                                       | 146 | 19 | 0.038144 | 1   |
| GO:0046390          | BP       | ribose phosphate biosynthetic process                                | 173 | 18 | 0.038997 | 1   |
| GO:0046597          | BP       | negative regulation of viral entry into host cell                    | 19  | 4  | 0.039105 | 1   |
| GO:0098794          | CC       | postsynapse                                                          | 597 | 62 | 0.039295 | 1   |
| GO:0019001          | MF       | guanyl nucleotide binding                                            | 364 | 32 | 0.039332 | 1   |
| GO:0032561          | MF       | guanyl ribonucleotide binding                                        | 364 | 32 | 0.039332 | 1   |
| GO:0030239          | BP       | myofibril assembly                                                   | 63  | 9  | 0.039367 | 1   |
| GO:0070570          | BP       | regulation of neuron projection regeneration                         | 30  | 6  | 0.039437 | 1   |
| GO:0035004          | MF       | phosphatidylinositol 3-kinase activity                               | 12  | 3  | 0.039801 | 1   |
| GO:0046148          | BP       | pigment biosynthetic process                                         | 54  | 7  | 0.039865 | 1   |
| GO:0061158          | BP       | 3'-UTR-mediated mRNA destabilization                                 | 17  | 4  | 0.040135 | 1   |
| GO:0022884          | MF       | macromolecule transmembrane transporter activity                     | 25  | 4  | 0.040483 | 1   |
| GO:0070884          | BP       | regulation of calcineurin-NFAT signaling cascade                     | 34  | 6  | 0.041251 | 1   |
| GO:0099022          | BP       | vesicle tethering                                                    | 10  | 3  | 0.041456 | 1   |
| GO:0048245          | BP       | eosinophil chemotaxis                                                | 19  | 3  | 0.041677 | 1   |
| GO:0043555          | BP       | regulation of translation in response to stress                      | 18  | 4  | 0.04176  | 1   |
| GO:0016331          | BP       | morphogenesis of embryonic epithelium                                | 145 | 19 | 0.041857 | 1   |
| GO:0036475          | BP       | neuron death in response to oxidative stress                         | 30  | 5  | 0.042594 | 1   |
| GO:0031252          | CC       | cell leading edge                                                    | 406 | 44 | 0.042627 | 1   |
| GO:0007026          | BP       | negative regulation of microtubule depolymerization                  | 23  | 5  | 0.043114 | 1   |
| GO:0099010          | BP       | modification of postsynaptic structure                               | 16  | 4  | 0.04326  | 1   |
| GO:0097061          | BP       | dendritic spine organization                                         | 78  | 12 | 0.043261 | 1   |
| GO:0005912          | CC       | adherens junction                                                    | 163 | 21 | 0.043413 | 1   |
| GO:0000049          | MF       | tRNA binding                                                         | 69  | 8  | 0.043449 | 1   |
| GO:0035338          | BP       | long-chain fatty-acyl-CoA biosynthetic process                       | 18  | 4  | 0.04352  | 1   |
| GO:0001539          | BP       | cilium or flagellum-dependent cell motility                          | 129 | 13 | 0.04365  | 1   |
| GO:0060285          | BP       | cilium-dependent cell motility                                       | 129 | 13 | 0.04365  | 1   |
| GO:0043129          | BP       | surfactant homeostasis                                               | 12  | 3  | 0.043864 | 1   |
| GO:0072337          | BP       | modified amino acid transport                                        | 31  | 5  | 0.043889 | 1   |
| GO:0050870          | BP       | positive regulation of T cell activation                             | 206 | 21 | 0.044154 | 1   |
| GO:0072175          | BP       | epithelial tube formation                                            | 131 | 17 | 0.044433 | 1   |

| FDR 1% Gene GO Term | ONTOLOGY | TERM                                                   | N   | DE | P.DE     | FDR |
|---------------------|----------|--------------------------------------------------------|-----|----|----------|-----|
| GO:0055002          | BP       | striated muscle cell development                       | 64  | 9  | 0.044488 | 1   |
| GO:0008287          | CC       | protein serine/threonine phosphatase complex           | 46  | 7  | 0.044524 | 1   |
| GO:1903293          | CC       | phosphatase complex                                    | 46  | 7  | 0.044524 | 1   |
| GO:0001838          | BP       | embryonic epithelial tube formation                    | 120 | 16 | 0.044568 | 1   |
| GO:0051403          | BP       | stress-activated MAPK cascade                          | 228 | 24 | 0.044636 | 1   |
| GO:0071545          | BP       | inositol phosphate catabolic process                   | 18  | 4  | 0.044762 | 1   |
| GO:1905207          | BP       | regulation of cardiocyte differentiation               | 34  | 6  | 0.045453 | 1   |
| GO:0016773          | MF       | phosphotransferase activity, alcohol group as acceptor | 635 | 62 | 0.045848 | 1   |
| GO:0061512          | BP       | protein localization to cilium                         | 63  | 8  | 0.046089 | 1   |
| GO:0060968          | BP       | regulation of gene silencing                           | 78  | 10 | 0.046238 | 1   |
| GO:0048207          | BP       | vesicle targeting, rough ER to cis-Golgi               | 13  | 3  | 0.046392 | 1   |
| GO:0048208          | BP       | COPII vesicle coating                                  | 13  | 3  | 0.046392 | 1   |
| GO:0000164          | CC       | protein phosphatase type 1 complex                     | 14  | 3  | 0.046813 | 1   |
| GO:0061303          | BP       | cornea development in camera-type eye                  | 11  | 3  | 0.046935 | 1   |
| GO:0035673          | MF       | oligopeptide transmembrane transporter activity        | 11  | 3  | 0.046971 | 1   |
| GO:0140467          | BP       | integrated stress response signaling                   | 22  | 4  | 0.046994 | 1   |
| GO:0043476          | BP       | pigment accumulation                                   | 11  | 3  | 0.047279 | 1   |
| GO:0043482          | BP       | cellular pigment accumulation                          | 11  | 3  | 0.047279 | 1   |
| GO:0035627          | BP       | ceramide transport                                     | 15  | 3  | 0.047371 | 1   |
| GO:0097449          | CC       | astrocyte projection                                   | 19  | 4  | 0.047626 | 1   |
| GO:0019904          | MF       | protein domain specific binding                        | 662 | 63 | 0.047649 | 1   |
| GO:0003714          | MF       | transcription corepressor activity                     | 172 | 20 | 0.048004 | 1   |
| GO:1990752          | CC       | microtubule end                                        | 33  | 6  | 0.048228 | 1   |
| GO:0042438          | BP       | melanin biosynthetic process                           | 21  | 4  | 0.048311 | 1   |
| GO:0060170          | CC       | ciliary membrane                                       | 72  | 9  | 0.048603 | 1   |
| GO:0000902          | BP       | cell morphogenesis                                     | 941 | 94 | 0.048707 | 1   |
| GO:1901214          | BP       | regulation of neuron death                             | 308 | 31 | 0.049508 | 1   |
| GO:0019207          | MF       | kinase regulator activity                              | 221 | 23 | 0.049546 | 1   |
| GO:0007274          | BP       | neuromuscular synaptic transmission                    | 25  | 5  | 0.049684 | 1   |
| GO:1990403          | BP       | embryonic brain development                            | 11  | 3  | 0.049721 | 1   |
| GO:0045321          | BP       | leukocyte activation                                   | 813 | 66 | 0.049746 | 1   |
| GO:0043523          | BP       | regulation of neuron apoptotic process                 | 203 | 22 | 0.049799 | 1   |

**Table S7C. GOMeth analysis of Kyoto Encyclopedia of Genes and Genomes (KEGG) databases-enriched pathways for annotated genes in bronchopulmonary dysplasia (BPD) epigenome.**

N=number of genes in GO term. DE=number of annotated genes in the differentially methylated CpGs. P.DE=-value for over-representation of the GO term. FDR=false discovery rate.

| FDR 1% Gene KEGG Terms | Description    | N  | DE | P.DE     | FDR |
|------------------------|----------------|----|----|----------|-----|
| path:hsa03020          | RNA polymerase | 32 | 2  | 0.039936 | 1   |

| FDR 5% Gene KEGG Terms | Description                       | N   | DE | P.DE     | FDR |
|------------------------|-----------------------------------|-----|----|----------|-----|
| path:hsa04510          | Focal adhesion                    | 193 | 26 | 0.012119 | 1   |
| path:hsa04015          | Rap1 signaling pathway            | 207 | 26 | 0.020342 | 1   |
| path:hsa04660          | T cell receptor signaling pathway | 99  | 13 | 0.027919 | 1   |
| path:hsa04931          | Insulin resistance                | 105 | 14 | 0.027946 | 1   |
| path:hsa04668          | TNF signaling pathway             | 108 | 13 | 0.034954 | 1   |
| path:hsa05163          | Human cytomegalovirus infection   | 214 | 24 | 0.036027 | 1   |
| path:hsa04979          | Cholesterol metabolism            | 49  | 7  | 0.037606 | 1   |
| path:hsa04662          | B cell receptor signaling pathway | 78  | 10 | 0.040356 | 1   |
| path:hsa04520          | Adherens junction                 | 70  | 11 | 0.040368 | 1   |
| path:hsa04915          | Estrogen signaling pathway        | 137 | 16 | 0.049065 | 1   |
| path:hsa04062          | Chemokine signaling pathway       | 188 | 19 | 0.049337 | 1   |









| id           | chr | p.start.hg19 | p.end.hg19 | p_adj      | fdr         | sig     | Ex_BPD.cord | Ex_noBPD.cord | dEx.cord | dEx_FD | symbols                 | description                                                            |
|--------------|-----|--------------|------------|------------|-------------|---------|-------------|---------------|----------|--------|-------------------------|------------------------------------------------------------------------|
| ILMN_1730731 | 10  | 101910052    | 101910103  | 0.00098052 | 0.046496262 | FDR0.05 | 7.135616914 | 7.385550735   | -0.25    | 0.84   | <b>ERLIN1</b>           | ER lipid raft associated 1                                             |
| ILMN_1689142 | 3   | 69105009     | 69105059   | 0.00098622 | 0.046505883 | FDR0.05 | 7.281738772 | 8.343849616   | -1.06    | 0.48   | <b>UBA3</b>             | ubiquitin like modifier activating enzyme 3                            |
| ILMN_1778681 | 5   | 158125898    | 158125949  | 0.00098835 | 0.046505883 | FDR0.05 | 9.727677194 | 9.918413751   | -0.19    | 0.88   | <b>EBF1</b>             | EBF transcription factor 1                                             |
| ILMN_1685467 | 18  | 32837922     | 32837973   | 0.00100078 | 0.046909416 | FDR0.05 | 7.728202264 | 8.547549347   | -0.82    | 0.57   | <b>ZNF397</b>           | zinc finger protein 397                                                |
| ILMN_2178088 | 5   | 43175395     | 43175446   | 0.00100542 | 0.046946527 | FDR0.05 | 7.307011089 | 8.163909556   | -0.86    | 0.55   | <b>ZNF131</b>           | zinc finger protein 131                                                |
| ILMN_3237769 | 1   | 143767831    | 143767882  | 0.001033   | 0.04801752  | FDR0.05 | 8.978421483 | 8.165576688   | 0.81     | 1.76   | <b>PPIAL4G//PPIAL4H</b> | peptidylprolyl isomerase A like 4G//peptidylprolyl isomerase A like 4H |
| ILMN_2169839 | 3   | 128888808    | 128888859  | 0.00104063 | 0.04801752  | FDR0.05 | 10.93101647 | 11.49202106   | -0.56    | 0.68   | <b>CNBP</b>             | CCHC-type zinc finger nucleic acid binding protein                     |
| ILMN_1766718 | 5   | 89811762     | 89811813   | 0.001044   | 0.04801752  | FDR0.05 | 8.096007253 | 9.311027835   | -1.22    | 0.43   | <b>LYSMD3</b>           | LysM domain containing 3                                               |
| ILMN_1782057 | 1   | 154323422    | 154323473  | 0.00104816 | 0.04801752  | FDR0.05 | 7.441429773 | 8.459560674   | -1.02    | 0.49   | <b>ATP8B2</b>           | ATPase phospholipid transporting 8B2                                   |
| ILMN_1721849 | 3   | 44637266     | 44637317   | 0.00105154 | 0.04801752  | FDR0.05 | 6.742815932 | 6.691870383   | 0.05     | 1.04   | <b>ZNF660</b>           | zinc finger protein 660                                                |
| ILMN_2151488 | 9   | 86618767     | 86618818   | 0.00105375 | 0.04801752  | FDR0.05 | 7.761275991 | 8.497911738   | -0.74    | 0.60   | <b>RMI1</b>             | RecQ mediated genome instability 1                                     |
| ILMN_1745256 | 5   | 139063269    | 139063320  | 0.00105594 | 0.04801752  | FDR0.05 | 7.861664046 | 8.850571493   | -0.99    | 0.50   | <b>CXXC5</b>            | CXXC finger protein 5                                                  |
| ILMN_1778617 | 5   | 68662367     | 68662418   | 0.00106866 | 0.048415439 | FDR0.05 | 6.715406787 | 8.094406083   | -1.38    | 0.38   | <b>AK6</b>              | adenylate kinase 6 TATA-box binding protein associated factor 9        |
| ILMN_1778617 | 5   | 68662367     | 68662418   | 0.00106866 | 0.048415439 | FDR0.05 | 6.715406787 | 8.094406083   | -1.38    | 0.38   | <b>TAF9</b>             | adenylate kinase 6 TATA-box binding protein associated factor 9        |
| ILMN_2316878 | 12  | 15749726     | 15749777   | 0.00108565 | 0.049002976 | FDR0.05 | 5.796271118 | 6.73565495    | -0.94    | 0.52   | <b>PTPRO</b>            | protein tyrosine phosphatase receptor type O                           |
| ILMN_1802615 | 7   | 92234657     | 92234708   | 0.00108999 | 0.049017311 | FDR0.05 | 8.71825053  | 9.300350634   | -0.58    | 0.67   | <b>CDK6</b>             | cyclin dependent kinase 6                                              |
| ILMN_1708098 | 1   | 145498764    | 145498815  | 0.00109722 | 0.049160901 | FDR0.05 | 8.42643328  | 8.98456172    | -0.56    | 0.68   | <b>LIX1L</b>            | limb and CNS expressed 1 like                                          |
| ILMN_2198867 | 3   | 167217947    | 167217998  | 0.00110289 | 0.049234096 | FDR0.05 | 7.75580714  | 7.41253885    | 0.34     | 1.27   | <b>WDR49</b>            | WD repeat domain 49                                                    |

[illegible]

































Table S9. Differentially methylated CpG sites associated with GA or BW

Page 18

| Trait | #cpg       | p        | fdr         | significance | chr | pos.hg19  | gene.llumina                       | gene.description                                                            | locations                      | dist2TSS | gene.nearest | gene.description                                                               |
|-------|------------|----------|-------------|--------------|-----|-----------|------------------------------------|-----------------------------------------------------------------------------|--------------------------------|----------|--------------|--------------------------------------------------------------------------------|
| GA    | cg16348358 | 2.67E-06 | 0.001336904 | FDR0.01      | 1   | 32731477  | LCK                                | tyrosine-protein kinase Lck                                                 | Body;Body                      | -8234    | LCK          | tyrosine-protein kinase Lck                                                    |
| GA    | cg16348385 | 7.84E-06 | 0.002904606 | FDR0.01      | 16  | 30106822  | TBX6;YPEL3;LOC101928595            | T-box transcription factor TBX6;protein yippe-like 3;                       | TSS5000;5'UTR;Body;TSS1500     | 712      | YPEL3        | protein yippe-like 3                                                           |
| GA    | cg16363586 | 1.57E-07 | 0.000169305 | FDR0.01      | 19  | 17516329  | BST2;BISPR;MV812A                  | bone marrow stromal antigen 2;BST2 interferon stimulated positive regulato  | 1stExon;TSS200;TSS200;TSS1500  | 110      | BST2         | bone marrow stromal antigen 2                                                  |
| GA    | cg16373471 | 1.04E-05 | 0.003515574 | FDR0.01      | 6   | 158982071 | TMEM181                            | transmembrane protein 181 isoform 2                                         | Body                           | 24604    | TMEM181      | transmembrane protein 181 isoform 2                                            |
| GA    | cg16373526 | 1.12E-08 | 2.31E-05    | BF FDR0.01   | 11  | 70248709  | CTTN                               | src substrate cactinin                                                      | Body;Body;Body                 | 4075     | CTTN         | src substrate cactinin                                                         |
| GA    | cg16374343 | 2.79E-05 | 0.00652881  | FDR0.01      | 17  | 1014352   | ABR                                | active breakpoint cluster region-related protein isoform c                  | TSS5000;Body;Body;Body;Body    | -2010    | ABR          | active breakpoint cluster region-related protein isoform c                     |
| GA    | cg16396284 | 2.40E-06 | 0.001251958 | FDR0.01      | 6   | 32455537  | RPS18;B3GALT4;WDR46                | 40S ribosomal protein S18;beta-1,3-galactosyltransferase 4;WD repeat-con    | TSS5000;1stExon;TSS5000;TES    | 638      | B3GALT4      | beta-1,3-galactosyltransferase 4                                               |
| GA    | cg16398761 | 2.44E-05 | 0.006341063 | FDR0.01      | 14  | 74220238  | ELMSA1                             |                                                                             | Body;Body;Body                 | -5211    | MIR4505      | microRNA 4505                                                                  |
| GA    | cg16398956 | 1.15E-06 | 0.000744865 | FDR0.01      | 14  | 100212958 |                                    |                                                                             | Body;Body;Body                 | -46791   | EML1         | echinoderm microtubule-associated protein-like 1 isoform b                     |
| GA    | cg16399664 | 3.67E-07 | 0.000322828 | FDR0.01      | 12  | 113417284 | OAS2                               | 2'-5'-oligoadenylate synthase 2                                             | Body;Body;Body                 | 961      | OAS2         | 2'-5'-oligoadenylate synthase 2                                                |
| GA    | cg16401270 | 5.97E-10 | 2.82E-06    | BF FDR0.01   | 1   | 32404469  | PTPA4A2                            | protein tyrosine phosphatase type IVA 3                                     | TSS1500;TSS1500;TSS1500;TSS    | -500     | PTPA4A2      | protein tyrosine phosphatase type IVA 3                                        |
| GA    | cg16429499 | 2.59E-05 | 0.006620317 | FDR0.01      | 16  | 3597151   | NLR3C                              | NLR family CARD domain-containing protein 3                                 | Body;Body                      | 30253    | NLR3C        | NLR family CARD domain-containing protein 3                                    |
| GA    | cg16435539 | 2.33E-05 | 0.006151357 | FDR0.01      | 3   | 39851009  | MYRIP                              | rab effector MYRIP                                                          | Body;TSS200;TSS200;TSS200;T    | -90      | MYRIP        | rab effector MYRIP                                                             |
| GA    | cg16435910 | 1.04E-05 | 0.003510259 | FDR0.01      | 2   | 174488472 |                                    |                                                                             | Body;Body;Body                 | 268873   | CDCA7        | cell division cycle-associated protein 7                                       |
| GA    | cg16437021 | 1.89E-06 | 0.001053523 | FDR0.01      | 16  | 89510331  | ANKRD11;LOC101927817               | ankyrin repeat domain-containing protein 11;uncharacterized LOC101927817    | Body;Body;Body;Body;Body;Bo    | 13006    | LOC101927817 | uncharacterized LOC101927817                                                   |
| GA    | cg16476991 | 1.37E-06 | 0.000846993 | FDR0.01      | 13  | 114831404 | RASA3                              | ras GTPase-activating protein 3                                             | Body;Body;Body                 | 12026    | RASA3        | ras GTPase-activating protein 3                                                |
| GA    | cg16509569 | 1.25E-07 | 0.000342459 | FDR0.01      | 12  | 54891634  | NCKAP1L                            | nck-associated protein 1-like                                               | 1stExon;TSS1500                | 99       | NCKAP1L      | nck-associated protein 1-like                                                  |
| GA    | cg16512598 | 2.98E-05 | 0.008711177 | FDR0.01      | 1   | 230413174 | SLANT2                             | polypeptide N-acetylglucosaminyltransferase 2 precursor                     | Body;Body                      | 148904   | PCGB05       | polypeptide N-acetylglucosaminyltransferase 2 precursor                        |
| GA    | cg16521454 | 2.25E-07 | 0.000220764 | FDR0.01      | 5   | 15018955  | SMIM3                              | small integral membrane protein 3                                           | Body                           | 1444     | SMIM3        | small integral membrane protein 3                                              |
| GA    | cg16536330 | 3.12E-06 | 0.001501075 | FDR0.01      | 8   | 29957344  | LEPROTL1                           | leptin receptor overlapping transcript-like 1                               | Body;Body                      | 4421     | LEPROTL1     | leptin receptor overlapping transcript-like 1                                  |
| GA    | cg16541026 | 1.56E-05 | 0.004732997 | FDR0.01      | 3   | 49026934  | ARIH2;PA4HTM                       | E3 ubiquitin-protein ligase ARIH2;transmembrane prolyl 4-hydroxylase isofo  | TSS5000;TSS5000;TSS5000;TES    | -406     | PA4HTM       | transmembrane prolyl 4-hydroxylase isoform c                                   |
| GA    | cg16553024 | 4.16E-06 | 0.001859625 | FDR0.01      | 7   | 116138462 | CAV2                               | caveolin-2                                                                  | TSS1500;TSS1500;TSS1500;TSS    | -1329    | CAV2         | caveolin-2                                                                     |
| GA    | cg16594273 | 2.87E-06 | 0.00141781  | FDR0.01      | 16  | 58131312  |                                    |                                                                             | Body;Body;Body;Body            | 31973    | CFAP20       | cilia- and flagella-associated protein 20                                      |
| GA    | cg16594502 | 9.28E-06 | 0.00325516  | FDR0.01      | 15  | 40339900  | SRP14-AS1                          | SRP14 antisense RNA1 (head to head)                                         | Body;Body;Body;Body            | 8389     | SRP14-AS1    | SRP14 antisense RNA1 (head to head)                                            |
| GA    | cg16624069 | 1.16E-10 | 9.28E-07    | BF FDR0.01   | 13  | 99630210  | DOCK9                              | dedicator of cytokinesis protein 9                                          | 5'UTR;5'UTR;5'UTR;5'UTR;5'UT   | 108      | DOCK9        | dedicator of cytokinesis protein 9                                             |
| GA    | cg16659026 | 9.11E-09 | 2.01E-05    | BF FDR0.01   | 19  | 54617827  | TFPT;PRPF31                        | TCF3 fusion partner;U4/U6 small nuclear ribonucleoprotein Prp31             | 1stExon;Body;TSS1500           | 627      | TFPT         | TCF3 fusion partner                                                            |
| GA    | cg16660091 | 2.00E-06 | 0.001099025 | FDR0.01      | 16  | 56995856  | CETP                               | cholesteryl ester transfer protein precursor                                | TSS200;TSS200                  | -5       | CETP         | cholesteryl ester transfer protein precursor                                   |
| GA    | cg16674433 | 8.44E-06 | 0.003053789 | FDR0.01      | 17  | 19314408  | RNF112                             | RING finger protein 112                                                     | TSS200                         | -136     | RNF112       | RING finger protein 112                                                        |
| GA    | cg16677144 | 3.03E-05 | 0.007286057 | FDR0.01      | 1   | 1790217   | GNB1                               | guanine nucleotide-binding protein G(I)/G(S)/G(T) subunit beta-1            | Body;Body;Body                 | 32305    | GNB1         | guanine nucleotide-binding protein G(I)/G(S)/G(T) subunit beta-1               |
| GA    | cg16679650 | 2.05E-05 | 0.005689047 | FDR0.01      | 1   | 24239820  | CNR2                               | cannabinoid receptor 2                                                      | 5'UTR                          | 32       | CNR2         | cannabinoid receptor 2                                                         |
| GA    | cg16701258 | 1.24E-05 | 0.004012568 | FDR0.01      | 19  | 5838729   | FUT6;FUT3                          | 4-galactosyl-N-acetylglucosaminide 3-alpha-L-fucosyltransferase FUT6 isofo  | 5'UTR;5'UTR;5'UTR;5'UTR;5'UT   | 74       | FUT6         | 4-galactosyl-N-acetylglucosaminide 3-alpha-L-fucosyltransferase FUT6 isoform 1 |
| GA    | cg16705546 | 5.33E-07 | 0.000419397 | FDR0.01      | 16  | 85936666  | IRF8                               | interferon regulatory factor 8                                              | 1stExon;Body;5'UTR             | 46       | IRF8         | interferon regulatory factor 8                                                 |
| GA    | cg16710042 | 1.74E-08 | 3.13E-05    | BF FDR0.01   | 2   | 165760725 | SLC38A11                           | putative sodium-coupled neutral amino acid transporter 11                   | Body;Body;Body;Body;Body;Bo    | 51310    | SLC38A11     | putative sodium-coupled neutral amino acid transporter 11                      |
| GA    | cg16725984 | 7.43E-06 | 0.002798005 | FDR0.01      | 16  | 89735184  | SPATA33                            | spermatogenesis-associated protein 33 isoform b                             | Body;Body;Body;Body;Body;Bo    | 10709    | SPATA33      | spermatogenesis-associated protein 33 isoform b                                |
| GA    | cg16729850 | 3.25E-05 | 0.007603126 | FDR0.01      | 12  | 5339813   | KRT8;KRT18                         | keratin, type II cytoskeletal 8;keratin, type I cytoskeletal 18             | Body;Body;Body;TSS5000;TSS5000 | -2841    | KRT18        | keratin, type I cytoskeletal 18                                                |
| GA    | cg16762386 | 3.72E-05 | 0.008373436 | FDR0.01      | 1   | 27240514  | NROB2                              | nuclear receptor subfamily 0 group B member 2                               | TSS200                         | -48      | NROB2        | nuclear receptor subfamily 0 group B member 2                                  |
| GA    | cg16764778 | 1.96E-05 | 0.0055298   | FDR0.01      | 15  | 41061410  | GCHFR;DNAIC17;C15orf62             | GTP cyclohydrolase 1 feedback regulatory protein;dnai homolog subfamily C   | TSS5000;Body;TSS1500           | -767     | C15orf62     | uncharacterized protein C15orf62, mitochondrial precursor                      |
| GA    | cg16774946 | 2.70E-07 | 0.000253397 | FDR0.01      | 13  | 24798195  | SPATA13                            | spermatogenesis-associated protein 13 isoform 6                             | Body;Body;1stExon              | 30382    | SPATA13-AS1  | SPATA13 antisense RNA 1                                                        |
| GA    | cg16777510 | 3.23E-07 | 0.00029416  | FDR0.01      | 17  | 40440022  | STAT5A                             | signal transducer and activator of transcription 5A isoform 1               | Body;5'UTR;TSS200;TSS200       | -15      | STAT5A       | signal transducer and activator of transcription 5A isoform 1                  |
| GA    | cg16794579 | 8.12E-09 | 1.88E-05    | BF FDR0.01   | 16  | 17562419  | XYLT1                              | xylosyltransferase 1 precursor                                              | Body                           | 2398     | XYLT1        | xylosyltransferase 1 precursor                                                 |
| GA    | cg16811185 | 2.45E-08 | 4.10E-05    | BF FDR0.01   | 17  | 29158330  | ATAD5                              | ATPase family AAA domain-containing protein 5                               | TSS1500                        | -453     | ATAD5        | ATPase family AAA domain-containing protein 5                                  |
| GA    | cg16845424 | 2.13E-05 | 0.00584668  | FDR0.01      | 4   | 83921902  | LIN54                              | protein lin-54 homolog                                                      | 5'UTR;5'UTR;5'UTR;5'UTR;Body   | 74       | LIN54        | protein lin-54 homolog                                                         |
| GA    | cg16872595 | 1.76E-05 | 0.005151912 | FDR0.01      | 18  | 77710649  | SLC66A2                            | solute carrier family 66 member 2                                           | Body;Body;Body                 | 1004     | SLC66A2      | solute carrier family 66 member 2                                              |
| GA    | cg16874095 | 2.04E-06 | 0.001118582 | FDR0.01      | 14  | 34529121  | EGLN3                              | prolyl 4-hydroxylase EGN3                                                   | Body;Body;Body                 | -108841  | EGLN3        | prolyl 4-hydroxylase EGN3                                                      |
| GA    | cg16882373 | 1.34E-05 | 0.004243003 | FDR0.01      | 7   | 26191458  | NFE2L3                             | nuclear factor erythroid 2-related factor 3                                 | TSS1500                        | -359     | NFE2L3       | nuclear factor erythroid 2-related factor 3                                    |
| GA    | cg16884222 | 7.93E-08 | 0.000101639 | BF FDR0.01   | 11  | 65191531  | NEAT1                              | nuclear paraspeckle assembly transcript 1                                   | Body;Body                      | 1263     | NEAT1        | nuclear paraspeckle assembly transcript 1                                      |
| GA    | cg16903510 | 1.52E-06 | 0.000913534 | FDR0.01      | 19  | 49314475  | BCAT2;HSD17B14                     | branched-chain amino acid aminotransferase 17;beta-hydroxysteroid dehydro   | TSS200;TSS200;TSS200;TSS5000   | -189     | BCAT2        | branched-chain amino acid aminotransferase                                     |
| GA    | cg16903735 | 2.12E-05 | 0.005838468 | FDR0.01      | 11  | 1903176   | LSP1;MIR7847                       | lipid-binding protein LSP1;microRNA 7847                                    | Body;Body;Body;Body;Body;Bo    | 1902     | MIR7847      | microRNA 7847                                                                  |
| GA    | cg16912563 | 1.33E-06 | 0.000828715 | FDR0.01      | 10  | 77157423  | ZNF503;ZNF503-AS2                  | zinc finger protein 503;ZNF503 antisense RNA 2                              | Body;TSS5000;TSS5000           | -3862    | ZNF503-AS2   | ZNF503 antisense RNA 2                                                         |
| GA    | cg16963852 | 3.11E-06 | 0.0149899   | FDR0.01      | 3   | 150479084 | SLAH2                              | E3 ubiquitin-protein ligase SLAH2                                           | Body                           | 1872     | SLAH2        | E3 ubiquitin-protein ligase SLAH2                                              |
| GA    | cg16990174 | 1.58E-05 | 0.00476344  | FDR0.01      | 3   | 72496875  | RYPB                               | ring and YY1 binding protein, isoform A                                     | TSS1500                        | -1101    | RYPB         | ring and YY1 binding protein, isoform A                                        |
| GA    | cg17004353 | 4.34E-05 | 0.009167231 | FDR0.01      | 11  | 3073441   | CARS1                              | cysteine--tRNA ligase, cytoplasmic                                          | Body;Body;Body;Body;Body       | 5212     | CARS1        | cysteine--tRNA ligase, cytoplasmic                                             |
| GA    | cg17009433 | 1.21E-05 | 0.003943719 | FDR0.01      | 9   | 6645686   | GLDC                               | glycine dehydrogenase (decarboxylating), mitochondrial precursor            | 5'UTR                          | 6        | GLDC         | glycine dehydrogenase (decarboxylating), mitochondrial precursor               |
| GA    | cg17018786 | 8.88E-06 | 0.003158889 | FDR0.01      | 15  | 40659816  | DISP2                              | protein dispatched homolog 2                                                | Body                           | 9397     | DISP2        | protein dispatched homolog 2                                                   |
| GA    | cg17022038 | 3.10E-07 | 0.000284877 | FDR0.01      | 19  | 18260479  | MAST3;PIK3R2                       | microtubule-associated serine/threonine-protein kinase 3;phosphatidylinosol | Body;TSS5000;TSS5000;TSS5000   | -3493    | PIK3R2       | phosphatidylinositol 3-kinase regulatory subunit beta                          |
| GA    | cg17084151 | 2.87E-06 | 0.001417488 | FDR0.01      | 8   | 102803237 | NCALD                              | neurocalcin-delta                                                           | TSS200;Body;Body;Body;Body;B   | -40      | NCALD        | neurocalcin-delta                                                              |
| GA    | cg17103217 | 1.12E-05 | 0.003731748 | FDR0.01      | 6   | 33245721  | RPS18;B3GALT4;WDR46                | 40S ribosomal protein S18;beta-1,3-galactosyltransferase 4;WD repeat-con    | TSS5000;1stExon;TSS5000;TES    | 822      | B3GALT4      | beta-1,3-galactosyltransferase 4                                               |
| GA    | cg17107867 | 3.38E-05 | 0.007800019 | FDR0.01      | 1   | 153522407 | S100A4;LOC101928034;S100A3         | protein S100-A4;uncharacterized LOC101928034;protein S100-A3                | TSS5000;Body;Body;TSS1500      | -673     | S100A3       | protein S100-A3                                                                |
| GA    | cg17113856 | 1.63E-07 | 0.000117971 | FDR0.01      | 6   | 32120895  | PRRT1;LOC100507547;PPT2;PPT2-EGFL8 | proline-rich transmembrane protein 1;uncharacterized LOC100507547;lyso      | TSS200;TSS1500;Body;Body;Bo    | -35      | PRRT1        | proline-rich transmembrane protein 1                                           |
| GA    | cg17117459 | 6.24E-08 | 8.38E-05    | BF FDR0.01   | 13  | 25085405  | PARP4                              | protein mono-ADP-ribosyltransferase PARP4                                   | Body                           | 1511     | PARP4        | protein mono-ADP-ribosyltransferase PARP4                                      |
| GA    | cg17133774 | 1.64E-07 | 0.000173203 | FDR0.01      | 1   | 6198667   | CHD5                               | chromodomain-helicase-DNA-binding protein 5                                 | Body                           | 41714    | CHD5         | chromodomain-helicase-DNA-binding protein 5                                    |
| GA    | cg17139085 | 2.55E-05 | 0.006538561 | FDR0.01      | 1   | 36787356  | SH3D21;EVA18                       | SH3 domain-containing protein 21;protein eva-1 homolog B                    | TSS5000;TSS5000;TSS5000;TES    | 1890     | EVA18        | protein eva-1 homolog B                                                        |
| GA    | cg17158750 | 3.26E-06 | 0.001551056 | FDR0.01      | 20  | 61924382  | ARF GAP1;COL20A1                   | ADP-ribosylation factor GTPase-activating protein 1;collagen alpha-1(X) cha | Body;Body;TSS5000;TSS5000;TES  | 155      | COL20A1      | collagen alpha-1(X) chain precursor                                            |
| GA    | cg17178761 | 9.46E-10 | 3.95E-06    | BF FDR0.01   | 17  | 55682851  | MS2;LOC101927539                   | RNA-binding protein Musashi homolog 2;uncharacterized LOC101927539          | TSS5000;Body;Body;Body;Body    | 2922     | LOC101927539 | uncharacterized LOC101927539                                                   |
| GA    | cg17181663 | 1.99E-05 | 0.005570512 | FDR0.01      | 6   | 144417517 | SBF5                               | splicing factor 3B subunit 5                                                | 3'UTR                          | 57       | SBF5         | splicing factor 3B subunit 5                                                   |
| GA    | cg17192381 | 4.40E-08 | 6.35E-05    | BF FDR0.01   | 18  | 60792598  | BCL2                               | apoptosis regulator Bcl-2                                                   | Body;5'UTR;5'UTR;5'UTR;TSS5000 | 194019   | BCL2         | apoptosis regulator Bcl-2                                                      |
| GA    | cg17264271 | 5.10E-07 | 0.000405089 | FDR0.01      | 6   | 152126938 | ESR1                               | estrogen receptor                                                           | Body;5'UTR;5'UTR;5'UTR;TSS5000 | 131      | ESR1         | estrogen receptor                                                              |
| GA    | cg17282828 | 3.19E-05 | 0.007490515 | FDR0.01      | 13  | 51418092  | DLEU7;DLEU7-AS1                    | leukemia-associated protein 7 isoform 2;DLEU7 antisense RNA 1               | TSS200;Body;TSS200             | -17      | DLEU7        | leukemia-associated protein 7 isoform 2                                        |
| GA    | cg17298279 | 2.43E-10 | 1.47E-06    | BF FDR0.01   | 6   | 158982078 | TMEM181                            | transmembrane protein 181 isoform 2                                         | Body                           | 24611    | TMEM181      | transmembrane protein 181 isoform 2                                            |
| GA    | cg17298925 | 1.84E-08 | 3.23E-05    | BF FDR0.01   | 5   | 6828054   | LINC02236;MIR4278                  | long intergenic non-protein coding RNA 2236;microRNA 4278                   | TSS5000;TSS200                 | -20      | MIR4278      | microRNA 4278                                                                  |
| GA    | cg17331950 | 6.15E-06 | 0.002455327 | FDR0.01      | 1   | 181075666 |                                    |                                                                             | Body                           | 17831    | IER5         | immediate early response gene 5 protein                                        |
| GA    | cg17394304 | 2.27E-05 | 0.006070677 | FDR0.01      | 3   | 187453973 | LOC100131635;BC16                  | hCG1645011-like-B-cell lymphoma 6 protein                                   | TSS5000;TSS1500;5'UTR;Body     | 316      | BC16         | B-cell lymphoma 6 protein                                                      |
| GA    | cg17399545 | 2.55E-06 | 0.001299485 | FDR0.01      | 12  | 88972226  | KITLG                              | kit ligand precursor                                                        | Body;Body                      | 2022     | KITLG        | kit ligand precursor                                                           |
| GA    | cg17404981 | 6.22E-08 | 8.38E-05    | BF FDR0.01   | 4   | 1240264   | CTBP1;CTBP1-DT                     | C-terminal-binding protein 1;CTBP1 divergent transcript                     | Body;Body;TSS5000              | 2654     | CTBP1        | C-terminal-binding protein 1                                                   |
| GA    | cg17431888 | 1.92E-06 | 0.001072185 | FDR0.01      | 1   | 183203863 | LAMC2                              | laminin subunit gamma-2 precursor                                           | Body;Body                      | 48465    | LAMC2        | laminin subunit gamma-2 precursor                                              |
| GA    | cg17452301 | 1.03E-09 | 4.24E-06    | BF FDR0.01   | 10  | 134211620 | PWWP28                             | PWWP domain-containing protein 28                                           | TSS200;TSS200;TSS5000          | 917      | PWWP28       | PWWP domain-containing protein 28                                              |
| GA    |            |          |             |              |     |           |                                    |                                                                             |                                |          |              |                                                                                |

| Trait | #cpg       | p        | fdr         | significance | chr | pos_hg19  | gene_illumina               | gene_description                                                                        | locations                       | dist2TSS | gene_nearest | gene_description                                                                     |
|-------|------------|----------|-------------|--------------|-----|-----------|-----------------------------|-----------------------------------------------------------------------------------------|---------------------------------|----------|--------------|--------------------------------------------------------------------------------------|
| GA    | cg17806418 | 1.53E-08 | 2.92E-05    | BF FORO.01   | 6   | 29599319  | GABBR1                      | gamma-aminobutyric acid type B receptor subunit 1 precursor                             | TSS5000;5'UTR;Body;Body         | 1593     | GABBR1       | gamma-aminobutyric acid type B receptor subunit 1 precursor                          |
| GA    | cg17819250 | 2.34E-05 | 0.006173504 | FORO.01      | 8   | 36380237  |                             |                                                                                         |                                 | -261654  | KCNU1        | potassium channel subfamily U member 1                                               |
| GA    | cg17819732 | 1.29E-05 | 0.004130828 | FORO.01      | 1   | 203147367 | MYBPH;CHI3L1                | myosin-binding protein H;chitinase-3-like protein 1 precursor                           | TSS5000;TES5000                 | -2413    | MYBPH        | myosin-binding protein H                                                             |
| GA    | cg17826530 | 1.21E-08 | 2.43E-05    | BF FORO.01   | 1   | 59280290  | LINC01135                   | long intergenic non-protein coding RNA 1135                                             | Body;Body;Body                  | 29468    | LINC01135    | long intergenic non-protein coding RNA 1135                                          |
| GA    | cg17837526 | 3.82E-05 | 0.008522108 | FORO.01      | 5   | 172410489 | ATP6V0E1                    | V-type proton ATPase subunit e 1                                                        | TSS1500                         | -284     | ATP6V0E1     | V-type proton ATPase subunit e 1                                                     |
| GA    | cg17840515 | 5.48E-07 | 0.000429246 | FORO.01      | 2   | 130940706 | SMIPD4;MZT2B                | sphingomyelin phosphodiesterase 4;mitotic-spindle organizing protein 2B                 | TSS1500;TSS1500;TSS1500;TSS     | 872      | MZT2B        | mitotic-spindle organizing protein 2B                                                |
| GA    | cg17881600 | 4.90E-08 | 6.90E-05    | BF FORO.01   | 6   | 17012979  |                             |                                                                                         |                                 | -89301   | STMN1        | stathmin domain-containing protein 1                                                 |
| GA    | cg17888086 | 9.42E-06 | 0.003292529 | FORO.01      | 1   | 37945057  | ZC3H12A;MIR6732             | ribonuclease ZC3H12A;microRNA 6732                                                      | Body;Body;Body;TSS1500          | -773     | MIR6732      | microRNA 6732                                                                        |
| GA    | cg17898925 | 1.08E-07 | 0.000129809 | BF FORO.01   | 4   | 83196047  |                             |                                                                                         |                                 | 99097    | HNRNPD       | heterogeneous nuclear ribonucleoprotein D0                                           |
| GA    | cg17924072 | 3.91E-13 | 1.46E-08    | BF FORO.01   | 19  | 1075067   | ARHGAP45                    | rho GTPase-activating protein 45                                                        | Body;Body;Body;Body;TSS5000     | -1565    | ARHGAP45     | rho GTPase-activating protein 45                                                     |
| GA    | cg17936488 | 8.27E-06 | 0.003023415 | FORO.01      | 9   | 134151519 | FAM78A                      | protein FAM78A                                                                          | 1stExon                         | 378      | FAM78A       | protein FAM78A                                                                       |
| GA    | cg17942763 | 5.26E-09 | 1.40E-05    | BF FORO.01   | 1   | 2163472   | SKI                         | ski oncogene                                                                            | Body                            | 3715     | SKI          | ski oncogene                                                                         |
| GA    | cg17950169 | 3.21E-11 | 3.99E-07    | BF FORO.01   | 1   | 226067900 | TMEM63A                     | CSC1-like protein 1                                                                     | Body                            | 2180     | TMEM63A      | CSC1-like protein 1                                                                  |
| GA    | cg17988187 | 4.07E-05 | 0.008820226 | FORO.01      | 2   | 74612222  | DCTN1;DCTN1-AS1             | dynactin subunit 1 isoform 1;DCTN1 antisense RNA 1                                      | TSS5000;TSS5000;TSS5000;Body    | -407     | DCTN1-AS1    | DCTN1 antisense RNA 1                                                                |
| GA    | cg18007957 | 1.12E-08 | 2.31E-05    | BF FORO.01   | 6   | 152011666 | ESR1                        | estrogen receptor                                                                       | 5'UTR                           | 36       | ESR1         | estrogen receptor                                                                    |
| GA    | cg18019132 | 6.55E-06 | 0.002574857 | FORO.01      | 11  | 65191707  | NEAT1                       | nuclear paraspeckle assembly transcript 1                                               | Body;Body                       | 1439     | NEAT1        | nuclear paraspeckle assembly transcript 1                                            |
| GA    | cg18076651 | 2.63E-09 | 8.28E-06    | BF FORO.01   | 12  | 53625605  | RARG                        | retinoic acid receptor gamma                                                            | Body;Body;Body                  | 388      | RARG         | retinoic acid receptor gamma                                                         |
| GA    | cg18082788 | 1.16E-05 | 0.003621264 | FORO.01      | 6   | 149806339 | ZC3H12D                     | probable ribonuclease ZC3H12D                                                           | TSS200                          | -189     | ZC3H12D      | probable ribonuclease ZC3H12D                                                        |
| GA    | cg18090197 | 6.48E-06 | 0.002554157 | FORO.01      | 7   | 99769602  | GAL3ST4;GPC2                | galactose-3-O-sulfotransferase 4;glypican-2 precursor                                   | TSS5000;Body                    | -3362    | GAL3ST4      | galactose-3-O-sulfotransferase 4                                                     |
| GA    | cg18115132 | 1.63E-05 | 0.004861424 | FORO.01      | 1   | 107819805 | NTNG1                       | netrin-G1 isoform G1c precursor                                                         | Body;Body;Body;Body;Body        | 135849   | NTNG1        | netrin-G1 isoform G1c precursor                                                      |
| GA    | cg18115766 | 3.24E-05 | 0.007584484 | FORO.01      | 3   | 23960290  | NKIRAS1;RPL15               | NF-kappa-B inhibitor-interacting Ras-like protein 1;60S ribosomal protein L15           | TSS5000;Body;Body;Body;Body     | 1668     | RPL15        | 60S ribosomal protein L15                                                            |
| GA    | cg18123677 | 3.63E-05 | 0.008241298 | FORO.01      | 3   | 167454339 | PDCD10;SERPINI1             | programmed cell death protein 10;neuroserpin precursor                                  | TSS5000;TSS5000;TSS5000;Body    | 829      | SERPINI1     | neuroserpin precursor                                                                |
| GA    | cg18137244 | 2.51E-05 | 0.006472746 | FORO.01      | 7   | 2444210   | CHST12                      | carbohydrate sulfotransferase 12                                                        | Body;Body;Body                  | 965      | CHST12       | carbohydrate sulfotransferase 12                                                     |
| GA    | cg18144742 | 5.41E-06 | 0.002241405 | FORO.01      | 14  | 107252125 |                             |                                                                                         |                                 | 7089     | MIR5195      | microRNA 5195                                                                        |
| GA    | cg18157896 | 1.61E-05 | 0.004852514 | FORO.01      | 20  | 2795593   | C20orf141;TMEM239           | uncharacterized protein C20orf141;transmembrane protein 239 isoform 2                   | TSS200;TSS200;TSS1500;TSS1500   | -39      | C20orf141    | uncharacterized protein C20orf141                                                    |
| GA    | cg18164508 | 8.60E-06 | 0.003100444 | FORO.01      | 12  | 133235007 | POLE                        | DNA polymerase epsilon catalytic subunit A                                              | Body                            | 28921    | POLE         | DNA polymerase epsilon catalytic subunit A                                           |
| GA    | cg18182566 | 1.97E-05 | 0.00553265  | FORO.01      | 14  | 105888161 | LOC100507437;MTA1           | uncharacterized LOC100507437;metastasis-associated protein MTA1                         | TSS5000;TSS5000;Body;Body       | 1998     | MTA1         | metastasis-associated protein MTA1                                                   |
| GA    | cg18188739 | 3.10E-06 | 0.001495921 | FORO.01      | 1   | 2058941   | PRKCZ                       | protein kinase C zeta type                                                              | Body;Body;Body;Body;Body        | 22787    | PRKCZ        | protein kinase C zeta type                                                           |
| GA    | cg18233411 | 1.40E-06 | 0.000859928 | FORO.01      | 12  | 74934087  | ATXN7L3B                    | ataxin-7-like protein 3B                                                                | 3'UTR                           | 2473     | ATXN7L3B     | ataxin-7-like protein 3B                                                             |
| GA    | cg18248273 | 3.93E-05 | 0.008454923 | FORO.01      | 17  | 77896431  | LINC01979;LINC1978          | long intergenic non-protein coding RNA 1979;long intergenic non-protein coding RNA 1978 | Body;Body                       | 3276     | LINC01978    | long intergenic non-protein coding RNA 1978                                          |
| GA    | cg18269345 | 2.15E-06 | 0.001653191 | FORO.01      | 11  | 66092919  | RIN1                        | Ras and Rho interactor 1                                                                | TSS5000;TSS5000;TSS5000         | -8403    | CD248        | podocalyxin precursor                                                                |
| GA    | cg18328933 | 1.58E-05 | 0.00476344  | FORO.01      | 3   | 52008538  | ABHD14B;ABHD14A;ABHD14A-AC1 | protein ABHD14B;protein ABHD14A precursor;ABHD14A-AC1 readthrough                       | 5'UTR;5'UTR;5'UTR;TSS1500;TSS   | 108      | ABHD14B      | protein ABHD14B                                                                      |
| GA    | cg18353563 | 8.92E-06 | 0.003165363 | FORO.01      | 3   | 127390935 | PODXL2;ABT81                | podocalyxin-like protein 2 precursor;ankyrin repeat and BTB/POZ domain-co               | Body;TSS1500;TSS1500;TSS1500    | -845     | ABT81        | ankyrin repeat and BTB/POZ domain-containing protein 1                               |
| GA    | cg18358061 | 2.92E-05 | 0.007120757 | FORO.01      | 3   | 134126698 |                             |                                                                                         |                                 | -29970   | MIR4788      | microRNA 4788                                                                        |
| GA    | cg18358136 | 1.34E-07 | 0.00015026  | FORO.01      | 19  | 46119636  | EMIL2                       | echinoderm microtubule-associated protein-like 2 isoform 3                              | Body;Body;Body;Body;Body;Body   | -14166   | GPR4         | G-protein coupled receptor 4                                                         |
| GA    | cg18365406 | 4.50E-06 | 0.001954883 | FORO.01      | 4   | 114721110 | PLPPR2                      | phospholipid phosphatase-related protein type 2 isoform 2                               | Body;Body                       | 6003     | PLPPR2       | phospholipid phosphatase-related protein type 2 isoform 2                            |
| GA    | cg18377881 | 3.08E-06 | 0.001485505 | FORO.01      | 4   | 114900050 | ARSL                        | arylsulfatase 1                                                                         | 5'UTR;5'UTR;5'UTR               | 753      | ARSL         | arylsulfatase 1                                                                      |
| GA    | cg18404811 | 3.54E-07 | 0.000313298 | FORO.01      | 17  | 403288    |                             |                                                                                         |                                 | -107557  | RFLNB        | reflin-B                                                                             |
| GA    | cg18405140 | 1.09E-06 | 0.000715501 | FORO.01      | 19  | 1207644   | STK11                       | serine/threonine-protein kinase STK11                                                   | Body                            | 1868     | STK11        | serine/threonine-protein kinase STK11                                                |
| GA    | cg18415791 | 1.09E-05 | 0.003661522 | FORO.01      | 11  | 3178024   | OSBP15                      | oxysterol-binding protein-related protein 5 isoform a                                   | Body;Body;Body                  | 8516     | OSBP15       | oxysterol-binding protein-related protein 5 isoform a                                |
| GA    | cg18422587 | 5.48E-09 | 1.44E-05    | BF FORO.01   | 7   | 3134670   |                             |                                                                                         |                                 | -51169   | CARD11       | caspace recruitment domain-containing protein 11                                     |
| GA    | cg18444673 | 2.06E-05 | 0.005706124 | FORO.01      | 19  | 36389500  | NFKBID;HCST                 | NF-kappa-B inhibitor delta;hematopoietic cell signal transducer precursor               | Body;Body;Body;Body;Body;TSS    | 1139     | NFKBID       | NF-kappa-B inhibitor delta                                                           |
| GA    | cg18454299 | 1.57E-07 | 0.000169305 | FORO.01      | 15  | 44959064  | SPG11;PATL2                 | spatacsin;protein PAT1 homolog 2 isoform 1                                              | TSS5000;TSS5000;Body;Body       | -3204    | SPG11        | spatacsin                                                                            |
| GA    | cg18474885 | 5.56E-06 | 0.002285468 | FORO.01      | 21  | 46292084  | PTTG1IP                     | pituitary tumor-transforming gene 1 protein-interacting protein precursor               | Body;Body;Body                  | 1521     | PTTG1IP      | pituitary tumor-transforming gene 1 protein-interacting protein precursor            |
| GA    | cg18476766 | 7.01E-06 | 0.002687741 | FORO.01      | 2   | 240529742 |                             |                                                                                         |                                 | -154811  | LOC150935    | uncharacterized LOC150935                                                            |
| GA    | cg18496212 | 3.09E-05 | 0.007364993 | FORO.01      | 3   | 69797108  | MITF                        | microphthalmia-associated transcription factor                                          | Body;Body;Body;Body;Body;Body   | 8494     | MITF         | microphthalmia-associated transcription factor                                       |
| GA    | cg18520238 | 7.92E-06 | 0.002927963 | FORO.01      | 11  | 36422557  | PRRSL                       | proline-rich protein 5-like                                                             | 5'UTR;Body;5'UTR;5'UTR          | 11       | PRRSL        | proline-rich protein 5-like                                                          |
| GA    | cg18537222 | 4.05E-06 | 0.001830165 | FORO.01      | 3   | 12435731  | PPARG                       | peroxisome proliferator-activated receptor gamma                                        | Body;Body;Body;Body;Body;Body   | 42731    | PPARG        | peroxisome proliferator-activated receptor gamma                                     |
| GA    | cg18556455 | 6.91E-06 | 0.002661343 | FORO.01      | 2   | 45178474  |                             |                                                                                         |                                 | -9457    | SIX3-AS1     | SIX3 antisense RNA 1                                                                 |
| GA    | cg18582260 | 4.15E-08 | 6.06E-05    | BF FORO.01   | 13  | 25085301  | PARP4                       | protein mono-ADP-ribosyltransferase PARP4                                               | Body                            | 1615     | PARP4        | protein mono-ADP-ribosyltransferase PARP4                                            |
| GA    | cg18586823 | 3.48E-05 | 0.007990815 | FORO.01      | 5   | 114525702 |                             |                                                                                         |                                 | -9459    | TRIM36       | E3 ubiquitin-protein ligase TRIM36                                                   |
| GA    | cg18592365 | 2.00E-06 | 0.001093955 | FORO.01      | 1   | 79472536  | ADGRL4                      | adhesion G protein-coupled receptor L4 precursor                                        | TSS200                          | -121     | ADGRL4       | adhesion G protein-coupled receptor L4 precursor                                     |
| GA    | cg18601167 | 3.53E-05 | 0.008069731 | FORO.01      | 7   | 752286    | PRKAR1B                     | cAMP-dependent protein kinase type I-beta regulatory subunit                            | TSS200;Body;Body;Body;Body;Body | -125     | PRKAR1B      | cAMP-dependent protein kinase type I-beta regulatory subunit                         |
| GA    | cg18608055 | 2.75E-05 | 0.006485882 | FORO.01      | 19  | 1130866   | SNOD2                       | protein strawberry notch homolog 2                                                      | Body;Body                       | 12       | SNOD2        | protein strawberry notch homolog 2                                                   |
| GA    | cg18621509 | 6.44E-06 | 0.002544636 | FORO.01      | 19  | 1591035   | MBO3                        | methyl CpG-binding domain protein 3                                                     | Body;Body                       | 1825     | MBO3         | methyl CpG-binding domain protein 3                                                  |
| GA    | cg18624506 | 7.46E-06 | 0.002806465 | FORO.01      | 7   | 99007560  | PODP1;BUD31;MIR12119        | 28 kDa heat- and acid-stable phosphoprotein;protein BUD31 homolog;micro                 | Body;Body;Body;Body;Body;TES5   | 766      | MIR12119     | microRNA 12119                                                                       |
| GA    | cg18642234 | 2.65E-06 | 0.001329339 | FORO.01      | 3   | 49394622  | GPX1;RHOA                   | glutathione peroxidase 1;transforming protein RhoA                                      | 3'UTR;3'UTR;3'UTR;3'UTR;3'UTR   | 1164     | GPX1         | glutathione peroxidase 1                                                             |
| GA    | cg18651932 | 1.28E-09 | 4.94E-06    | BF FORO.01   | 4   | 77226974  | FAM47E;STBD1                | starch-binding domain-containing protein 1                                              | Body;TSS1500                    | -204     | STBD1        | starch-binding domain-containing protein 1                                           |
| GA    | cg18666075 | 1.52E-06 | 0.000911324 | FORO.01      | 3   | 156833184 | LINC00880                   | long intergenic non-protein coding RNA 880                                              | Body                            | 7607     | LINC00880    | long intergenic non-protein coding RNA 880                                           |
| GA    | cg18674487 | 1.94E-06 | 0.001076846 | FORO.01      | 6   | 125203651 |                             |                                                                                         |                                 | -80039   | RNF217       | probable E3 ubiquitin-protein ligase RNF217 isoform b                                |
| GA    | cg18697487 | 3.38E-05 | 0.007803092 | FORO.01      | 19  | 1502095   | REEP6;ADAMTSL5              | receptor expression-enhancing protein 6;ADAMTSL5-like protein 5 isoform 1               | TSS5000;TSS5000;TES5000;TES     | 10916    | REEP6        | receptor expression-enhancing protein 6                                              |
| GA    | cg18727788 | 1.18E-10 | 9.28E-07    | BF FORO.01   | 12  | 31944556  | H3-5                        | histone H3.3                                                                            | 3'UTR                           | 676      | H3-5         | histone H3.3                                                                         |
| GA    | cg18731680 | 6.63E-07 | 0.000496565 | FORO.01      | 22  | 19953712  | COMT;MIR4761;ARVCF          | catechol O-methyltransferase;microRNA 4761;armadillo repeat protein dele                | Body;Body;Body;Body;Body;TES    | 2437     | MIR4761      | microRNA 4761                                                                        |
| GA    | cg18754118 | 1.39E-06 | 0.00085407  | FORO.01      | 19  | 2588376   | GNMG7                       | guanine nucleotide-binding protein G(I)/G(S)/G(O) subunit gamma-7                       | Body                            | -42336   | MIR7850      | microRNA 7850                                                                        |
| GA    | cg18769818 | 4.12E-06 | 0.001848217 | FORO.01      | 11  | 72433059  | ARAP1                       | arf-GAP with Rho-GAP domain, ANK repeat and PH domain-containing prote                  | 5'UTR;5'UTR;5'UTR;Body;Body     | 326      | ARAP1        | arf-GAP with Rho-GAP domain, ANK repeat and PH domain-containing protein 1 isoform d |
| GA    | cg18808039 | 4.72E-05 | 0.009666218 | FORO.01      | 8   | 61825469  |                             |                                                                                         |                                 | 54838    | LOC100130298 | HCS181633-like                                                                       |
| GA    | cg18810691 | 3.09E-05 | 0.007368105 | FORO.01      | 7   | 151130479 | CRYGN;MIR3907               | gamma-crystallin N;microRNA 3907                                                        | Body;Body;Body;TES5000          | 246      | MIR3907      | microRNA 3907                                                                        |
| GA    | cg18833928 | 8.68E-06 | 0.00311387  | FORO.01      | 7   | 38357684  |                             |                                                                                         |                                 | -23493   | TRG-AS1      | T cell receptor gamma locus antisense RNA 1                                          |
| GA    | cg18841653 | 2.63E-09 | 8.28E-06    | BF FORO.01   | 10  | 5046097   | AKR1C2                      | aldo-keto reductase family 1 member C2                                                  | 5'UTR;5'UTR;5'UTR;5'UTR         | 109      | AKR1C2       | aldo-keto reductase family 1 member C2                                               |
| GA    | cg18844118 | 9.46E-07 | 0.000644763 | FORO.01      | 7   | 26191489  | NFE2L3                      | nuclear factor erythroid 2-related factor 3                                             | TSS1500                         | -328     | NFE2L3       | nuclear factor erythroid 2-related factor 3                                          |
| GA    | cg18876826 | 2.95E-05 | 0.007183669 | FORO.01      | 1   | 38396334  | INPP5B                      | type II inositol 1,4,5-trisphosphate 5-phosphatase isoform 2 precursor                  | Body;Body;Body;Body;Body;Body   | 1077     | INPP5B       | type II inositol 1,4,5-trisphosphate 5-phosphatase isoform 2 precursor               |
| GA    | cg18892239 | 1.79E-07 | 0.000186905 | FORO.01      | 6   | 31620798  | BAG6;APOM                   | large proline-rich protein BAG6;apolipoprotein M precursor                              | TSS1500;TSS1500;TSS1500;TSS     | -321     | BAG6         | large proline-rich protein BAG6                                                      |
| GA    | cg18900271 | 4.32E-06 | 0.001899024 | FORO.01      | 2   | 110863888 | MALL                        | MAL-like protein                                                                        | Body;Body;Body                  | 9513     | MALL         | MAL-like protein                                                                     |
| GA    | cg18900591 | 1.03E-06 | 0.000688948 | FORO.01      | 20  | 50419193  | SALL4                       | sal-like protein 4                                                                      | TSS200;TSS200                   | -133     | SALL4        | sal-like protein 4                                                                   |
| GA    | cg18940763 | 1.92E-06 | 0.001072185 | FORO.01      | 22  | 29197846  | XBP1                        | X-box-binding protein 1 isoform XBP1(S)                                                 | TSS1500;TSS1500                 | -1286    | XBP1         | X-box-binding protein 1 isoform XBP1(S)                                              |
| GA    | cg18966401 | 1.95E-06 | 0.001079122 | FORO.01      | 1   | 201979478 | RNPEP;ELF3-AS1;ELF3         | aminopeptidase B isoform c;ELF3 antisense RNA 1;ETS-related transcription               | TSS5000;TSS5000;TSS5000;TES     | 3        | ELF3-AS1     | ELF3 antisense RNA 1                                                                 |
| GA    | cg19008371 | 2.35E-07 | 0.000227554 | FORO.01      | 11  | 126227676 | GSEC;ST3GAL4                | G-quadruplex forming sequence containing lncRNA;CMP-N-acetylneuramin                    | TSS1500;Body;Body;Body;Body     | 860      | ST3GAL4      | CMP-N-acetylneuraminase-beta-galactosidase- alpha-2,3-                               |
| GA    | cg19020855 | 1.11E-05 | 0.003689027 | FORO.01      | 17  | 41669266  |                             |                                                                                         |                                 | -45558   | ETV4         | ETS translocation variant 4 isoform 2                                                |
| GA    | cg19035526 | 8.46E-06 | 0.0030552   | FORO.01      | 2   | 217       |                             |                                                                                         |                                 |          |              |                                                                                      |

Table S9. Differentially methylated CpG sites associated with GA or BW

| Trait | #cpg       | p        | fdr           | significance | chr | pos.hg19  | gene.llumina                                   | gene.description                                                                                                                                                    | locations                       | dist2TSS | gene.nearest | gene.description                                                        |
|-------|------------|----------|---------------|--------------|-----|-----------|------------------------------------------------|---------------------------------------------------------------------------------------------------------------------------------------------------------------------|---------------------------------|----------|--------------|-------------------------------------------------------------------------|
| GA    | cg19174643 | 3.74E-05 | 0.008410914   | FDR0.01      | 18  | 13136426  |                                                | disks large homolog 4;very long chain specific acyl-CoA dehydrogenase, mitochondrial                                                                                | TSS5000;TSS5000;TSS1500;TSS     | -82332   | LDRAD4       | low-density lipoprotein receptor class A domain-containing protein 4    |
| GA    | cg19217955 | 1.78E-08 | 3.16E-05      | BF FDR0.01   | 17  | 7123994   | DLG4;ACADVL;MIR324;DVL2                        |                                                                                                                                                                     |                                 | -625     | DLG4         | disks large homolog 4                                                   |
| GA    | cg19220719 | 8.72E-06 | 0.003125393   | FDR0.01      | 10  | 7752329   | LRMDA                                          | leucine-rich melanocyte differentiation-associated protein                                                                                                          | Body;Body                       | -10189   | LRMDA        | leucine-rich melanocyte differentiation-associated protein              |
| GA    | cg19230709 | 2.81E-05 | 0.006947446   | FDR0.01      | 19  | 4933046   | UHRF1;MIRA747                                  | E3 ubiquitin-protein ligase UHRF1;microRNA 4747                                                                                                                     | Body;Body;Body;Body;Body;TE     | 348      | MIRA747      | microRNA 4747                                                           |
| GA    | cg19233405 | 1.44E-05 | 0.004095389   | FDR0.01      | 1   | 15498871  | ZBTB7B;DCS12                                   | zinc finger and BTB domain-containing protein 7B;DC-STAMP domain-containing protein 12                                                                              | Body;Body;Body;Body;Body;TE     | 13616    | ZBTB7B       | zinc finger and BTB domain-containing protein 7B                        |
| GA    | cg19241468 | 2.54E-06 | 0.001299485   | FDR0.01      | 3   | 122399344 | PARP14                                         | poly (ADP-ribose) polymerase 14                                                                                                                                     | TSS1500                         | -341     | PARP14       | poly (ADP-ribose) polymerase 14                                         |
| GA    | cg19241689 | 2.79E-05 | 0.006920655   | FDR0.01      | 6   | 33245516  | RPS18;B3GALT4;WDR46                            | 40S ribosomal protein S18;beta-1,3-galactosyltransferase 4;WD repeat-containing protein 46                                                                          | TSS5000;1stExon;TSS5000;TES     | 617      | B3GALT4      | beta-1,3-galactosyltransferase 4                                        |
| GA    | cg19258882 | 5.41E-06 | 0.002241405   | FDR0.01      | 12  | 56472805  | ERBB3                                          | receptor tyrosine-protein kinase erbB-3 precursor                                                                                                                   | TSS5000;TSS1500                 | -1003    | ERBB3        | receptor tyrosine-protein kinase erbB-3 precursor                       |
| GA    | cg19323289 | 6.39E-06 | 0.002530236   | FDR0.01      | 11  | 19463903  | NAV2                                           | neurotrophin receptor interacting factor homolog isoform d                                                                                                          | Body                            | 64873    | NAV2-AS5     | NAV2 antisense RNA 5                                                    |
| GA    | cg19327213 | 2.68E-07 | 0.000251907   | FDR0.01      | 19  | 47988783  | KPTN;NAPA-AS1;NAPA                             | KICSTOR complex protein kaptin;NAPA antisense RNA 1;alpha-soluble NSF attachment protein                                                                            | TSS1500;TSS1500;TSS1500;Body    | 1245     | NAPA-AS1     | NAPA antisense RNA 1                                                    |
| GA    | cg19355069 | 2.28E-05 | 0.006068474   | FDR0.01      | 12  | 125028302 | NCOR2                                          | nuclear receptor corepressor 2                                                                                                                                      | Body;Body;Body                  | 23856    | NCOR2        | nuclear receptor corepressor 2                                          |
| GA    | cg19359550 | 4.92E-07 | 0.000396481   | FDR0.01      | 12  | 5137028   |                                                |                                                                                                                                                                     |                                 | -16016   | KCNAS        | potassium voltage-gated channel subfamily A member 5                    |
| GA    | cg19381811 | 9.62E-07 | 0.000653562   | FDR0.01      | 3   | 49851713  | UBA7                                           | ubiquitin-like modifier-activating enzyme 7                                                                                                                         | TSS1500                         | -327     | UBA7         | ubiquitin-like modifier-activating enzyme 7                             |
| GA    | cg19401033 | 4.30E-07 | 0.000363063   | FDR0.01      | 3   | 107148372 | LINC01990                                      | long intergenic non-protein coding RNA 1990                                                                                                                         | TSS1500                         | -1404    | LINC01990    | long intergenic non-protein coding RNA 1990                             |
| GA    | cg19416570 | 9.51E-06 | 0.003315348   | FDR0.01      | 19  | 58715677  | ZNF274                                         | neurotrophin receptor-interacting factor homolog isoform d                                                                                                          | Body;Body;Body;Body             | 21250    | ZNF274       | neurotrophin receptor-interacting factor homolog isoform d              |
| GA    | cg19426721 | 2.67E-06 | 0.001336804   | FDR0.01      | 19  | 49992527  | TLT3LG;RPL13A;SNORD32A;SNORD33;SNORD34;SNORD35 | translated tyrosine kinase 3 ligand precursor;60S ribosomal protein L13a;small nuclear RNA, C/D box 32A;small nuclear RNA, C/D box 33;small nuclear RNA, C/D box 34 | TSS5000;TES5000;TES5000;TES     | -695     | SNORD32A     | small nuclear RNA, C/D box 32A                                          |
| GA    | cg19429405 | 2.96E-08 | 4.79E-05      | BF FDR0.01   | 10  | 73497698  | CDK32;C10orf105                                | cyclin-dependent kinase 32;uncharacterized protein C10orf105                                                                                                        | Body;TSS200                     | -2       | C10orf105    | uncharacterized protein C10orf105                                       |
| GA    | cg19439123 | 8.53E-07 | 0.000597035   | FDR0.01      | 17  | 17687621  | RAI1;SMCR5                                     | decapping nuclease;Smith-Magenis syndrome chromosome region, candidate 5                                                                                            | Body;TSS5000                    | -4778    | SMCR5        | Smith-Magenis syndrome chromosome region, candidate 5                   |
| GA    | cg19442415 | 1.94E-08 | 3.33E-05      | BF FDR0.01   | 11  | 116567334 |                                                |                                                                                                                                                                     |                                 | 57196    | LINC02702    | long intergenic non-protein coding RNA 2702                             |
| GA    | cg19448292 | 1.05E-07 | 0.000127695   | BF FDR0.01   | 20  | 35504064  | TLOC2                                          | TLD domain-containing protein 2                                                                                                                                     | TSS1500;TSS1500                 | -459     | TLOC2        | TLD domain-containing protein 2                                         |
| GA    | cg19449067 | 1.13E-05 | 0.003748447   | BF FDR0.01   | 6   | 152011103 | ESR1                                           | estrogen receptor                                                                                                                                                   | TSS1500                         | -527     | ESR1         | estrogen receptor                                                       |
| GA    | cg19483007 | 7.81E-07 | 0.000560334   | FDR0.01      | 3   | 149327651 | WWTR1                                          | WW domain-containing transcription regulator protein 1                                                                                                              | Body;Body;Body;Body             | 48161    | WWTR1        | WW domain-containing transcription regulator protein 1                  |
| GA    | cg19483465 | 4.01E-05 | 0.008741223   | FDR0.01      | 12  | 132896939 | GALNT9                                         | polypeptide N-acetylgalactosaminyltransferase 9                                                                                                                     | Body                            | 9236     | GALNT9       | polypeptide N-acetylgalactosaminyltransferase 9                         |
| GA    | cg19498884 | 1.62E-09 | 5.93E-06      | BF FDR0.01   | 10  | 102760724 | LZTS2                                          | leucine zipper putative tumor suppressor 2                                                                                                                          | Body;Body;Body;TSS5000          | 1160     | LZTS2        | leucine zipper putative tumor suppressor 2                              |
| GA    | cg19540316 | 2.39E-05 | 0.006266604   | FDR0.01      | 13  | 113622750 | MCFL2-AS1;MCFL2                                | MCFL2 antisense RNA 1;guanine nucleotide exchange factor DBS                                                                                                        | Body;TSS1500;TSS1500            | 202      | MCFL2-AS1    | MCFL2 antisense RNA 1                                                   |
| GA    | cg19548859 | 3.66E-05 | 0.008278866   | FDR0.01      | 10  | 11239482  | CELF2                                          | CUGBP Elav-like family member 2                                                                                                                                     | Body;Body;Body;Body;Body        | 32490    | CELF2        | CUGBP Elav-like family member 2                                         |
| GA    | cg19576697 | 6.27E-09 | 1.56E-05      | BF FDR0.01   | 5   | 176837920 | F12                                            | coagulation factor XII precursor                                                                                                                                    | TSS1500                         | -1343    | F12          | coagulation factor XII precursor                                        |
| GA    | cg19577671 | 4.89E-05 | 0.009937236   | FDR0.01      | 19  | 42782524  | CIC                                            | protein capicua homolog isoform CIC-5                                                                                                                               | Body                            | -6292    | CIC          | protein capicua homolog isoform CIC-5                                   |
| GA    | cg19595760 | 4.32E-06 | 0.001899024   | FDR0.01      | 1   | 25948511  | MAN1CL1                                        | mannosyl-oligosaccharidase 1,2-alpha-mannosidase IC isoform 1                                                                                                       | Body;Body                       | 4553     | MAN1CL1      | mannosyl-oligosaccharidase 1,2-alpha-mannosidase IC isoform 1           |
| GA    | cg19597845 | 6.70E-06 | 0.002498452   | FDR0.01      | 6   | 52934457  | FOXO9                                          | F-box only protein 9                                                                                                                                                | Body;Body;TSS1500               | -1343    | FOXO9        | F-box only protein 9                                                    |
| GA    | cg19619003 | 2.89E-06 | 0.001427528   | FDR0.01      | 1   | 41846758  | FOXO6                                          | forkhead box protein O6                                                                                                                                             | Body                            | -5417    | FOXO6-AS1    | FOXO6 antisense RNA 1                                                   |
| GA    | cg19619576 | 8.60E-06 | 0.003100689   | FDR0.01      | 17  | 17718525  | RAI1;SREBF1;MIR6777;MIR338                     | decapping nuclease;sterol regulatory element-binding protein 1;microRNA 6777;microRNA 338                                                                           | TSS5000;Body;Body;Body;TSS5     | -1008    | MIR338       | microRNA 338                                                            |
| GA    | cg19622662 | 8.84E-07 | 0.000612079   | FDR0.01      | 1   | 167090972 | DUSP27                                         | inactive dual specificity phosphatase 27                                                                                                                            | Body                            | 27661    | DUSP27       | inactive dual specificity phosphatase 27                                |
| GA    | cg19653589 | 3.59E-08 | 5.52E-05      | BF FDR0.01   | 19  | 2614177   | GNIG7                                          | guanine nucleotide-binding protein G(I)/G(S)/G(O) subunit gamma-7                                                                                                   | Body                            | -16535   | MIR7850      | microRNA 7850                                                           |
| GA    | cg19687075 | 1.61E-07 | 0.000171077   | FDR0.01      | 9   | 139428384 | NOTCH1                                         | neurogenic locus notch homolog protein 1                                                                                                                            | Body                            | 12116    | NOTCH1       | neurogenic locus notch homolog protein 1                                |
| GA    | cg19695266 | 1.04E-05 | 0.003510259   | FDR0.01      | 1   | 1241672   | ACAP3;SNORD167;PUSL1                           | arf-GAP with coiled-coil, ANK repeat and PH domain-containing protein 3;small nuclear RNA, C/D box 167                                                              | Body;TSS1500;TSS5000;TSS5000    | -1480    | SNORD167     | small nuclear RNA, C/D box 167                                          |
| GA    | cg19708901 | 4.64E-05 | 0.0095745     | FDR0.01      | 1   | 180882655 | KIAA1614                                       | uncharacterized protein KIAA1614                                                                                                                                    | Body                            | 623      | KIAA1614     | uncharacterized protein KIAA1614                                        |
| GA    | cg19713429 | 6.54E-07 | 0.000409853   | FDR0.01      | 1   | 19810690  | CAPZB                                          | F-actin-capping protein subunit beta                                                                                                                                | 1stExon;Body;Body;Body;Body     | 99       | CAPZB        | F-actin-capping protein subunit beta                                    |
| GA    | cg19715094 | 1.79E-06 | 0.001025988   | FDR0.01      | 11  | 118402540 | KMT2A;LOC101929089;TTC36;TMEM25                | histone-lysine N-methyltransferase 2A isoform 2 precursor;tetratricopeptide repeat domain-containing protein 25                                                     | TSS5000;TSS1500;TSS1500;TSS     | 634      | TMEM25       | transmembrane protein 25 precursor                                      |
| GA    | cg19726321 | 1.51E-06 | 0.000980881   | FDR0.01      | 2   | 37909996  |                                                |                                                                                                                                                                     |                                 | -9904    | CDCA2EP3     | cdc42 effector protein 3                                                |
| GA    | cg19727396 | 3.33E-05 | 0.00729903    | FDR0.01      | 1   | 230415185 | GALNT2                                         | polypeptide N-acetylgalactosaminyltransferase 2 precursor                                                                                                           | Body;Body                       | 146893   | PG805        | piggyBac transposable element-derived protein 5                         |
| GA    | cg19734413 | 4.09E-07 | 0.000349502   | FDR0.01      | 2   | 112913178 | FBNL7                                          | fibulin-7 precursor                                                                                                                                                 | Body;Body                       | 17217    | FBNL7        | fibulin-7 precursor                                                     |
| GA    | cg19760965 | 3.16E-10 | 1.81E-06      | BF FDR0.01   | 3   | 194888842 | XXYLT1;XXYLT1-AS2                              | xyloside xylosyltransferase 1;XXYLT1 antisense RNA 2                                                                                                                | Body;Body;Body;Body             | 244      | XXYLT1-AS2   | XXYLT1 antisense RNA 2                                                  |
| GA    | cg19776942 | 1.55E-08 | 2.92E-05      | BF FDR0.01   | 1   | 32714164  | FAM167B;LCK                                    | protein FAM167B;tyrosine-protein kinase Lck                                                                                                                         | Body;TSS5000;TSS5000            | 1342     | FAM167B      | protein FAM167B                                                         |
| GA    | cg19784880 | 1.11E-09 | 4.44E-06      | BF FDR0.01   | 5   | 178957344 |                                                |                                                                                                                                                                     |                                 | -20210   | RUFY1        | RUN and FYVE domain-containing protein 1                                |
| GA    | cg19789466 | 4.30E-07 | 0.000363063   | FDR0.01      | 12  | 113344923 | OAS1                                           | 2'-5'-oligoadenylate synthase 1                                                                                                                                     | 1stExon;1stExon;1stExon;1stExon | -157     | OAS1         | 2'-5'-oligoadenylate synthase 1                                         |
| GA    | cg19801120 | 5.36E-08 | 7.40E-05      | BF FDR0.01   | 6   | 53530570  | KLHL31                                         | kelch-like protein 31                                                                                                                                               | TSS200                          | -167     | KLHL31       | kelch-like protein 31                                                   |
| GA    | cg19802390 | 5.61E-09 | 1.44E-05      | BF FDR0.01   | 1   | 2840177   |                                                |                                                                                                                                                                     |                                 | -97853   | ACTR2        | actin-related protein T2                                                |
| GA    | cg19848082 | 9.15E-06 | 0.003228567   | FDR0.01      | 2   | 74232673  | TET3                                           | methylcytosine dioxygenase TET3 isoform 2                                                                                                                           | Body;Body                       | 2855     | TET3         | methylcytosine dioxygenase TET3 isoform 2                               |
| GA    | cg19851816 | 9.33E-12 | 1.54E-07      | BF FDR0.01   | 22  | 50657907  | SELENOO;TUBGCP6                                | selenoprotein O precursor;gamma-tubulin complex component 6                                                                                                         | TSS5000;Body                    | 18468    | SELENOO      | selenoprotein O precursor                                               |
| GA    | cg19863740 | 2.08E-05 | 0.005754992   | FDR0.01      | 22  | 44576869  | PARVG                                          | gamma-parvin                                                                                                                                                        | Body;5'UTR                      | 65       | PARVG        | gamma-parvin                                                            |
| GA    | cg19915505 | 2.68E-05 | 0.006750105   | FDR0.01      | 3   | 32147840  | GPDI1                                          | glycerol-3-phosphate dehydrogenase 1-like protein                                                                                                                   | TSS200                          | -162     | GPDI1        | glycerol-3-phosphate dehydrogenase 1-like protein                       |
| GA    | cg19917989 | 1.55E-05 | 0.004703333   | FDR0.01      | 6   | 14925093  |                                                |                                                                                                                                                                     |                                 | -321206  | JARID2       | protein JARID2                                                          |
| GA    | cg19950606 | 9.01E-08 | 0.000113076   | BF FDR0.01   | 17  | 76121276  | TM6C                                           | transmembrane channel-like protein 6                                                                                                                                | Body;Body;Body                  | 3595     | TM6C         | transmembrane channel-like protein 6                                    |
| GA    | cg19987060 | 1.01E-05 | 0.007242909   | FDR0.01      | 6   | 52530180  | LOC730101                                      | uncharacterized LOC730101                                                                                                                                           | Body;Body                       | 182      | LOC730101    | uncharacterized LOC730101                                               |
| GA    | cg20012607 | 1.22E-06 | 0.000777858   | FDR0.01      | 13  | 100085450 |                                                |                                                                                                                                                                     |                                 | 66105    | LINC01232    | long intergenic non-protein coding RNA 1232                             |
| GA    | cg20025977 | 1.85E-05 | 0.005334084   | FDR0.01      | 4   | 1579814   |                                                |                                                                                                                                                                     |                                 | 105904   | FAM53A       | protein FAM53A isoform 1                                                |
| GA    | cg20038070 | 1.03E-05 | 0.003507333   | FDR0.01      | 4   | 4482826   | STX18;STX18-IT1                                | syntaxin-18;STX18 intronic transcript 1                                                                                                                             | Body;Body;Body;Body;Body        | 601      | STX18-IT1    | STX18 intronic transcript 1                                             |
| GA    | cg20072118 | 4.51E-11 | 4.48E-07      | BF FDR0.01   | 12  | 52653637  | KRT87P                                         | keratin 87 pseudogene                                                                                                                                               | TSS1500                         | -1345    | KRT87P       | keratin 87 pseudogene                                                   |
| GA    | cg20090859 | 1.54E-08 | 2.92E-05      | BF FDR0.01   | 8   | 80590435  |                                                |                                                                                                                                                                     |                                 | 67084    | STMN2        | stathmin-2                                                              |
| GA    | cg20100768 | 3.39E-05 | 0.007814581   | FDR0.01      | 13  | 80706924  |                                                |                                                                                                                                                                     |                                 | 121713   | LINC01080    | long intergenic non-protein coding RNA 1080                             |
| GA    | cg20107668 | 1.50E-07 | 0.000163644   | FDR0.01      | 13  | 113624471 | MCFL2-AS1;MCFL2                                | MCFL2 antisense RNA 1;guanine nucleotide exchange factor DBS                                                                                                        | TSS5000;Body;5'UTR              | 598      | MCFL2        | guanine nucleotide exchange factor DBS                                  |
| GA    | cg20117260 | 4.52E-05 | 0.009411417   | FDR0.01      | 19  | 41937434  | B3GNT8;DMAC2                                   | UDP-GlcNAc:betaGal beta-1,3-N-acetylglucosaminyltransferase 8 precursor;DMAC2                                                                                       | TSS5000;3'UTR;3'UTR;3'UTR       | -2799    | B3GNT8       | UDP-GlcNAc:betaGal beta-1,3-N-acetylglucosaminyltransferase 8 precursor |
| GA    | cg20122518 | 2.51E-05 | 0.00646645    | FDR0.01      | 7   | 810958    | DNAF5                                          | dynein assembly factor 5, axonemal                                                                                                                                  | Body;Body                       | -43645   | PRKAR1B      | cAMP-dependent protein kinase type I-beta regulatory subunit            |
| GA    | cg20139800 | 2.18E-05 | 0.005904872   | FDR0.01      | 6   | 29599178  | GABBR1                                         | gamma-aminobutyric acid type B receptor subunit 1 precursor                                                                                                         | TSS5000;5'UTR;Body;Body         | 1734     | GABBR1       | gamma-aminobutyric acid type B receptor subunit 1 precursor             |
| GA    | cg20140596 | 1.44E-05 | 0.003821364   | FDR0.01      | 17  | 27507917  | MYO18A                                         | myosin XVIIIA isoform e                                                                                                                                             | TSS5000;TSS1500;TSS1500;TSS     | 601      | MYO18A       | myosin XVIIIA isoform e                                                 |
| GA    | cg20149937 | 4.24E-06 | 0.001877278   | FDR0.01      | 19  | 3465709   | NFIC                                           | nuclear factor I-type C                                                                                                                                             | 3'UTR;3'UTR;3'UTR;3'UTR         | 14814    | SMIN2A       | small integral membrane protein 24 precursor                            |
| GA    | cg20156116 | 1.52E-05 | 0.004642211   | FDR0.01      | 1   | 156699437 | ISG20L2;RRNAD1                                 | interferon-stimulated 20 kDa exonuclease-like 2;protein RRNAD1                                                                                                      | TSS1500;TSS1500;TSS1500;TSS     | -879     | ISG20L2      | interferon-stimulated 20 kDa exonuclease-like 2                         |
| GA    | cg20160197 | 4.41E-05 | 0.009269461   | FDR0.01      | 4   | 1222037   | CTBP1                                          | C-terminal-binding protein 1                                                                                                                                        | Body;Body                       | 18130    | CTBP1-AS     | CTBP1 antisense RNA                                                     |
| GA    | cg20167216 | 1.81E-05 | 0.005295275   | FDR0.01      | 7   | 142353463 |                                                |                                                                                                                                                                     |                                 | -20667   | MTNRN2L6     | humanin-like 6                                                          |
| GA    | cg20181887 | 4.18E-05 | 0.008952664   | FDR0.01      | 12  | 123753272 | CDK2AP1                                        | cyclin-dependent kinase 2-associated protein 1                                                                                                                      | TSS1500;Body;Body;Body;Body     | -471     | CDK2AP1      | cyclin-dependent kinase 2-associated protein 1                          |
| GA    | cg20229014 | 1.01E-08 | 2.16E-05      | BF FDR0.01   | 8   | 134529378 | ST3GAL1                                        | CMP-N-acetylneuraminic acid-6-galactosyltransferase 1                                                                                                               | Body;Body                       | 54752    | ST3GAL1      | CMP-N-acetylneuraminic acid-6-galactosyltransferase 1                   |
| GA    | cg20239639 | 1.97E-06 | 0.001084302   | FDR0.01      | 1   | 32739493  | LCK                                            | tyrosine-protein kinase Lck                                                                                                                                         | Body;Body;TSS1500               | -218     | LCK          | tyrosine-protein kinase Lck                                             |
| GA    | cg20248822 | 1.75E-05 | 0.005129309   | FDR0.01      | 1   | 19922867  | LOC105378614;MICOS10;MICOS10-NB11              | uncharacterized LOC105378614;MICOS complex subunit MICO10 isoform c;MICOS10-NB11                                                                                    | Body;TSS1500;TSS1500;TSS1500    | 459      | LOC105378614 | uncharacterized LOC105378614                                            |
| GA    | cg20249277 | 1.14E-05 | 0.003760645   | FDR0.01      | 7   | 112120877 | IFRD1;LSMEM1                                   | interferon-related development regulator 1;leucine-rich single-pass membrane protein 1                                                                              | TSS5000;TES5000;TES5000;TES     | -30      | LSMEM1       | leucine-rich single-pass membrane protein 1                             |
| GA    | cg20253872 | 3.81E-09 | 1.07E-05      | BF FDR0.01   | 1   | 110166571 | AMPD2                                          | AMP deaminase 2                                                                                                                                                     | Body;Body;Body;Body;TSS200      | -38      | AMPD2        | AMP deaminase 2                                                         |
| GA    | cg20272935 | 1.86E-07 | 0.000191392   | FDR0.01      | 11  | 67785720  | UNC33B1                                        | protein unc-93 homolog B1                                                                                                                                           | Body                            | 5847     | UNC33B1      | protein unc-93 homolog B1                                               |
| GA    | cg20285026 | 1.46E-05 | 0.009589947</ |              |     |           |                                                |                                                                                                                                                                     |                                 |          |              |                                                                         |

Table S9. Differentially methylated CpG sites associated with GA or BW

Page 21

| Trait | #cpg       | p        | fdr         | significance | chr | pos.hg19  | gene.llumina                      | gene.description                                                                | locations                    | dist2TSS | gene.nearest | gene.description                                                        |
|-------|------------|----------|-------------|--------------|-----|-----------|-----------------------------------|---------------------------------------------------------------------------------|------------------------------|----------|--------------|-------------------------------------------------------------------------|
| GA    | cg20429981 | 1.51E-07 | 0.000164394 | FOR0.01      | 1   | 1609972   | SLC35E2B                          | solute carrier family 35 member E2B                                             | Body;Body                    | 14262    | SLC35E2B     | solute carrier family 35 member E2B                                     |
| GA    | cg20457732 | 2.89E-05 | 0.007103144 | FOR0.01      | 1   | 71172486  | LINC01788                         | long intergenic non-protein coding RNA 1788                                     | Body                         | 351      | LINC01788    | long intergenic non-protein coding RNA 1788                             |
| GA    | cg20460227 | 3.81E-06 | 0.001745616 | FOR0.01      | 2   | 120452632 | TMEM177                           | transmembrane protein 177                                                       | Body                         | 15856    | TMEM177      | transmembrane protein 177                                               |
| GA    | cg20460366 | 4.40E-05 | 0.009527985 | FOR0.01      | 20  | 44994032  | CDH22                             | cadherin-22 precursor                                                           | Body                         | 3105     | CDH22        | cadherin-22 precursor                                                   |
| GA    | cg20462883 | 4.60E-08 | 6.55E-05    | BF FOR0.01   | 12  | 122461621 | BCI7A                             | B-cell CLL/lymphoma 7 protein family member A isoform a                         | Body;Body                    | 1832     | BCI7A        | B-cell CLL/lymphoma 7 protein family member A isoform a                 |
| GA    | cg20515944 | 2.63E-05 | 0.006874668 | FOR0.01      | 7   | 157412886 | PITPNM2                           | receptor-type tyrosine-protein phosphatase N2 isoform 4 precursor               | Body;Body;Body;Body;Body     | 45772    | MIR153-2     | microRNA 153-2                                                          |
| GA    | cg20520115 | 2.92E-06 | 0.001432923 | FOR0.01      | 2   | 75063838  | HK2                               | hexokinase 2                                                                    | Body;Body                    | 1542     | HK2          | hexokinase 2                                                            |
| GA    | cg20534570 | 7.26E-06 | 0.002754318 | FOR0.01      | 22  | 41763093  | TEF                               | transcription factor VBP                                                        | TSS1500                      | -243     | TEF          | transcription factor VBP                                                |
| GA    | cg20556503 | 1.72E-05 | 0.005069174 | FOR0.01      | 21  | 46349095  | ITGB2;ITGB2-AS1;LINC01547         | integrin beta-2 precursor;ITGB2 antisense RNA 1;long intergenic non-protein     | TSS1500;Body;Body;Body;Body  | -365     | ITGB2        | integrin beta-2 precursor                                               |
| GA    | cg20556951 | 4.27E-05 | 0.009067438 | FOR0.01      | 17  | 45934112  | SP6                               | transcription factor Sp6                                                        | TSS1500                      | -1049    | SP6          | transcription factor Sp6                                                |
| GA    | cg20566766 | 1.87E-05 | 0.005359664 | FOR0.01      | 5   | 138723816 | SLC23A1;MZB1;PROB1                | solute carrier family 23 member 1;marginal zone B- and B1-cell-specific protein | TSS5000;TSS5000;Body;TSS5000 | 1786     | MZB1         | marginal zone B- and B1-cell-specific protein precursor                 |
| GA    | cg20575191 | 4.24E-05 | 0.009044808 | FOR0.01      | 15  | 77324607  | PSTPIP1                           | proline-serine-threonine phosphatase-interacting protein 1                      | Body;Body;Body;Body;Body     | 37141    | PSTPIP1      | proline-serine-threonine phosphatase-interacting protein 1              |
| GA    | cg20591407 | 5.72E-06 | 0.002336898 | FOR0.01      | 12  | 16426663  | LOC107984507                      | uncharacterized LOC107984507                                                    | TSS1500                      | -1305    | LOC107984507 | uncharacterized LOC107984507                                            |
| GA    | cg20600379 | 9.64E-06 | 0.003403381 | FOR0.01      | 6   | 32909282  | HLA-DMB                           | HLA class II histocompatibility antigen, DM beta chain precursor                | TSS1500                      | -477     | HLA-DMB      | HLA class II histocompatibility antigen, DM beta chain precursor        |
| GA    | cg20600850 | 5.84E-07 | 0.000450038 | FOR0.01      | 12  | 67125155  | CHD4                              | chromodomain-helicase-DNA-binding protein 4                                     | Body;Body;Body               | 3102     | CHD4         | chromodomain-helicase-DNA-binding protein 4                             |
| GA    | cg20630655 | 2.55E-06 | 0.001299485 | FOR0.01      | 15  | 75918700  | SNUPN                             | snurportin-1                                                                    | TSS1500;5'UTR;TSS1500        | 19       | SNUPN        | snurportin-1                                                            |
| GA    | cg20638351 | 2.52E-05 | 0.006504809 | FOR0.01      | 7   | 150383154 | GIMAP2                            | GTPase IMAP family member 2                                                     | Body                         | 363      | GIMAP2       | GTPase IMAP family member 2                                             |
| GA    | cg20670933 | 2.43E-06 | 0.001264441 | FOR0.01      | 18  | 9915771   | VAPA                              | vesicle-associated membrane protein-associated protein A                        | Body;Body                    | 2759     | VAPA         | vesicle-associated membrane protein-associated protein A                |
| GA    | cg20701531 | 6.51E-07 | 0.000489438 | FOR0.01      | 2   | 121582695 | GLI2                              | zinc finger protein GLI2                                                        | Body;Body                    | 33839    | GLI2         | zinc finger protein GLI2                                                |
| GA    | cg20716774 | 3.83E-05 | 0.00852482  | FOR0.01      | 5   | 10601638  | ANKRD33B                          | ankyrin repeat domain-containing protein 33B                                    | Body                         | 37457    | ANKRD33B     | ankyrin repeat domain-containing protein 33B                            |
| GA    | cg20721135 | 6.36E-07 | 0.000481893 | FOR0.01      | 13  | 114861488 | RASA3                             | ras GTPase-activating protein 3                                                 | Body;Body                    | -18058   | RASA3        | ras GTPase-activating protein 3                                         |
| GA    | cg20765408 | 4.43E-07 | 0.000368958 | FOR0.01      | 13  | 25085669  | PARP4                             | protein mono-ADP-ribosyltransferase PARP4                                       | Body                         | 1247     | PARP4        | protein mono-ADP-ribosyltransferase PARP4                               |
| GA    | cg20773127 | 3.41E-06 | 0.001604402 | FOR0.01      | 4   | 111397155 | ENPEP                             | glutamyl aminopeptidase                                                         | TSS200                       | -155     | ENPEP        | glutamyl aminopeptidase                                                 |
| GA    | cg20773320 | 1.90E-05 | 0.005409077 | FOR0.01      | 5   | 179048967 | HNRNP1                            | heterogeneous nuclear ribonucleoprotein H                                       | Body;Body;Body;Body;Body     | 1435     | HNRNP1       | heterogeneous nuclear ribonucleoprotein H                               |
| GA    | cg20777390 | 5.96E-09 | 1.49E-05    | BF FOR0.01   | 12  | 123587316 | PITPNM2                           | membrane-associated phosphatidylinositol transfer protein 2                     | Body;Body                    | 7659     | PITPNM2      | membrane-associated phosphatidylinositol transfer protein 2             |
| GA    | cg20792436 | 1.63E-05 | 0.00486214  | FOR0.01      | 17  | 79972570  | ASPCRL1;CENPX                     | tether containing UBX domain for GLUT4 isoform 1;centromere protein X           | Body;Body;Body;Body;TSS5000  | 8184     | CENPX        | centromere protein X                                                    |
| GA    | cg20793071 | 3.51E-12 | 6.45E-08    | BF FOR0.01   | 1   | 54520450  | TMEM59;TCEANC2;MIR4781            | transmembrane protein 59 precursor;transcription elongation factor A N-term     | TSS5000;TSS5000;TSS5000;TSS  | 699      | MIR4781      | microRNA 4781                                                           |
| GA    | cg20797674 | 5.59E-07 | 0.000435319 | FOR0.01      | 1   | 35656325  | SFPQ                              | splicing factor, proline- and glutamine-rich                                    | Body;Body;Body               | 2421     | SFPQ         | splicing factor, proline- and glutamine-rich                            |
| GA    | cg20803796 | 1.15E-06 | 0.000743425 | FOR0.01      | 8   | 145103842 | SPATCL1;SMPD5;OPLAH               | spermidin:sphingomyelin phosphodiesterase 5 (pseudogene);5-oxoprolinase         | TSS5000;TSS5000;TSS1500;TES  | -456     | SMPD5        | sphingomyelin phosphodiesterase 5 (pseudogene)                          |
| GA    | cg20824977 | 3.11E-09 | 9.33E-06    | BF FOR0.01   | 15  | 59978600  | SNRP2                             | BCL2/adenovirus E1B 19 kDa protein-interacting protein 2                        | Body;Body;Body;Body;Body;Bo  | 2525     | SNRP2        | BCL2/adenovirus E1B 19 kDa protein-interacting protein 2                |
| GA    | cg20830542 | 2.08E-07 | 0.002707542 | FOR0.01      | 2   | 54035559  | PSME4                             | proteasome activator complex subunit 4;acylphosphatase-2                        | Body;TSS5000;TSS5000         | 2534     | PSME4        | proteasome activator complex subunit 4                                  |
| GA    | cg20850016 | 2.27E-05 | 0.006070677 | FOR0.01      | 3   | 5165254   | ARL8B                             | ADP-ribosylation factor-like protein 8B                                         | Body                         | 1278     | ARL8B        | ADP-ribosylation factor-like protein 8B                                 |
| GA    | cg20855296 | 3.83E-05 | 0.00852482  | FOR0.01      | 17  | 16255560  | CENPV                             | centromere protein V                                                            | Body                         | 1223     | CENPV        | centromere protein V                                                    |
| GA    | cg20870559 | 1.11E-05 | 0.003707138 | FOR0.01      | 12  | 113416518 | OAS2                              | 2'-5'-oligoadenylate synthase 2                                                 | 1stExon;1stExon;1stExon      | 195      | OAS2         | 2'-5'-oligoadenylate synthase 2                                         |
| GA    | cg20885815 | 1.77E-06 | 0.001013961 | FOR0.01      | 2   | 27478320  | SLC30A3                           | zinc transporter 3                                                              | Body;Body;Body;Body          | 7595     | SLC30A3      | zinc transporter 3                                                      |
| GA    | cg20889322 | 3.67E-09 | 1.05E-05    | BF FOR0.01   | 11  | 65196622  | NEAT1                             | nuclear paraspeckle assembly transcript 1                                       | TSS5000;Body                 | 6354     | NEAT1        | nuclear paraspeckle assembly transcript 1                               |
| GA    | cg20893956 | 5.90E-07 | 0.000435856 | FOR0.01      | 6   | 152126736 | ESR1                              | estrogen receptor                                                               | Body;TSS200;TSS200;TSS200;T  | -71      | ESR1         | estrogen receptor                                                       |
| GA    | cg20899625 | 1.20E-05 | 0.00319522  | FOR0.01      | 3   | 126721131 | PLXNA1                            | plexin-A1 precursor                                                             | Body                         | 13695    | PLXNA1       | plexin-A1 precursor                                                     |
| GA    | cg20902783 | 2.96E-05 | 0.007183669 | FOR0.01      | 14  | 21494071  | NDRG2;MIR6717;TPP2                | protein NDRG2;microRNA 6717;tubulin polymerization-promoting protein fa         | TSS1500;TSS1500;TSS1500;TSS  | -136     | NDRG2        | protein NDRG2                                                           |
| GA    | cg20912066 | 4.12E-05 | 0.008874072 | FOR0.01      | 11  | 107436729 | ALKBH8                            | alkylated DNA repair protein alkb homolog 8 isoform 1                           | TSS1500;TSS1500              | -268     | ALKBH8       | alkylated DNA repair protein alkb homolog 8 isoform 1                   |
| GA    | cg20914572 | 1.24E-05 | 0.004023256 | FOR0.01      | 6   | 32119874  | PRRT1;LOC100507547;PPT2;PPT2-EGF8 | proline-rich transmembrane protein 1;uncharacterized LOC100507547;lysos         | TSS1500;TSS200;TSS5000;TES   | -158     | PRRT1        | proline-rich transmembrane protein 1                                    |
| GA    | cg20926021 | 8.36E-07 | 0.000589047 | FOR0.01      | 4   | 154169814 | TRIM2                             | tripartite motif-containing protein 2                                           | Body;Body;Body;Body;Body;Bo  | -8696    | TRIM2        | tripartite motif-containing protein 2                                   |
| GA    | cg20930815 | 1.43E-06 | 0.004876737 | FOR0.01      | 11  | 9093983   | SCUB2                             | signal peptide, CUB and EGF-like domain-containing protein 2 isoform 1 pre      | Body;Body;Body;Body;Body     | 12533    | MIR5691      | microRNA 5691                                                           |
| GA    | cg20934305 | 2.57E-09 | 8.26E-06    | BF FOR0.01   | 14  | 93118717  | RIN3                              | ras and Rab interactor 3 isoform 2                                              | Body;Body                    | 76139    | RIN3         | ras and Rab interactor 3 isoform 2                                      |
| GA    | cg20945261 | 2.04E-05 | 0.00567018  | FOR0.01      | 3   | 13460618  | NUP210                            | nuclear pore membrane glycoprotein 210 precursor                                | Body                         | -120     | NUP210       | nuclear pore membrane glycoprotein 210 precursor                        |
| GA    | cg21002651 | 2.38E-06 | 0.001249385 | FOR0.01      | 11  | 104905889 | CASP1                             | caspase-1                                                                       | TSS200;TSS200;TSS200;TSS200  | 5        | CASP1        | caspase-1                                                               |
| GA    | cg21022247 | 1.14E-05 | 0.003769925 | FOR0.01      | 12  | 51718310  | BIN2;CELA1                        | bridging integrator 2;chymotrypsin-like elastase family member 1 precursor      | TSS1500;TSS1500;TSS1500;TSS  | 142      | BIN2         | bridging integrator 2                                                   |
| GA    | cg21063275 | 1.11E-08 | 2.31E-05    | BF FOR0.01   | 15  | 22466195  | IGHV1OR15-3                       | immunoglobulin heavy variable 1/OR15-3 (pseudogene)                             | Body                         | 352      | IGHV1OR15-3  | immunoglobulin heavy variable 1/OR15-3 (pseudogene)                     |
| GA    | cg21069019 | 4.06E-05 | 0.008802751 | FOR0.01      | 2   | 6636278   |                                   |                                                                                 |                              | -120724  | LINC01247    | long intergenic non-protein coding RNA 1247                             |
| GA    | cg21081878 | 1.63E-06 | 0.000960311 | FOR0.01      | 21  | 38334730  | HLCS                              | biotin--protein ligase isoform 2                                                | TSS200;Body;Body;Body;Body   | -72      | HLCS         | biotin--protein ligase isoform 2                                        |
| GA    | cg21105477 | 6.88E-07 | 0.000511349 | FOR0.01      | 5   | 133560149 | PPP2CA;MIR3661                    | serine/threonine-protein phosphatase 2A catalytic subunit alpha isoform;mi      | Body;Body;Body;TSS1500       | 1096     | PPP2CA       | serine/threonine-protein phosphatase 2A catalytic subunit alpha isoform |
| GA    | cg21105928 | 5.90E-06 | 0.002389782 | FOR0.01      | 15  | 40143956  | GPR176                            | G-protein coupled receptor 176                                                  | Body;Body                    | -22479   | GPR176       | G-protein coupled receptor 176                                          |
| GA    | cg21121843 | 1.19E-05 | 0.003902943 | FOR0.01      | 4   | 3203982   | HIT                               | huntingtin                                                                      | Body                         | -42113   | MIR5ANTD1    | myb/SANT-like DNA-binding domain-containing protein 1                   |
| GA    | cg21132686 | 2.08E-08 | 3.51E-05    | BF FOR0.01   | 20  | 22795774  |                                   |                                                                                 |                              | -129792  | LINC01747    | long intergenic non-protein coding RNA 1747                             |
| GA    | cg21139003 | 1.40E-05 | 0.00437772  | FOR0.01      | 2   | 33173301  | LINC00486;LTBP1                   | latent TGF-beta binding protein precursor                                       | TSS5000;Body                 | 17       | LTBP1        | latent TGF-beta binding protein precursor                               |
| GA    | cg21139150 | 8.03E-06 | 0.002961627 | FOR0.01      | 21  | 46976175  | SLC19A1                           | reduced folate transporter                                                      | Body                         | 6784     | SLC19A1      | reduced folate transporter                                              |
| GA    | cg21142743 | 2.13E-06 | 0.001153858 | FOR0.01      | 1   | 228272495 | ARE1                              | ADP-ribosylation factor 1                                                       | Body;Body;Body;Body          | 1645     | ARE1         | ADP-ribosylation factor 1                                               |
| GA    | cg21146537 | 3.30E-12 | 6.41E-08    | BF FOR0.01   | 22  | 35695301  | HMGXB4;TOM1                       | HMG domain-containing protein 4;target of Myb protein 1                         | TSS5000;TSS5000;TSS5000;5'U  | 34       | TOM1         | target of Myb protein 1                                                 |
| GA    | cg21147708 | 4.22E-05 | 0.009013544 | FOR0.01      | 6   | 7611002   | SNRNP48                           | U11/U12 small nuclear ribonucleoprotein 48 kDa protein                          | 3'UTR                        | 20572    | SNRNP48      | U11/U12 small nuclear ribonucleoprotein 48 kDa protein                  |
| GA    | cg21157690 | 4.11E-09 | 1.14E-05    | BF FOR0.01   | 6   | 152126895 | ESR1                              | estrogen receptor                                                               | Body;5'UTR;5'UTR;5'UTR;TSS   | 88       | ESR1         | estrogen receptor                                                       |
| GA    | cg21160842 | 3.72E-05 | 0.008371958 | FOR0.01      | 11  | 32112091  | RCN1                              | reticulocalbin-1 precursor                                                      | TSS1500                      | -528     | RCN1         | reticulocalbin-1 precursor                                              |
| GA    | cg21176629 | 2.91E-08 | 4.73E-05    | BF FOR0.01   | 8   | 67838106  | MCMDC2;SNHG6;SNORD87              | minichromosome maintenance domain-containing protein 2 isoform c;small          | TSS5000;TSS1500;TSS1500;TSS  | -330     | SNHG6        | small nucleolar RNA host gene 6                                         |
| GA    | cg21186955 | 1.12E-08 | 2.31E-05    | BF FOR0.01   | 7   | 100729412 | TRIM56                            | E3 ubiquitin-protein ligase TRIM56                                              | Body                         | 651      | TRIM56       | E3 ubiquitin-protein ligase TRIM56                                      |
| GA    | cg21201657 | 4.23E-08 | 6.15E-05    | BF FOR0.01   | 19  | 5624574   | SAFB2;SAFB                        | scaffold attachment factor B2;scaffold attachment factor B1                     | TSS5000;Body;Body;Body;Body  | 1481     | SAFB         | scaffold attachment factor B1                                           |
| GA    | cg21228270 | 8.86E-06 | 0.003154681 | FOR0.01      | 9   | 133871033 |                                   |                                                                                 |                              | -13527   | LAMC3        | lamrin subunit gamma-3 precursor                                        |
| GA    | cg21239798 | 4.30E-06 | 0.00189565  | FOR0.01      | 5   | 111756360 | EPB4114A;EPB4114A-DT              | band 4.1-like protein 4A;EPB4114A divergent transcript                          | TSS1500;TSS1500;TSS1500;TSS  | 1083     | EPB4114A-DT  | EPB4114A divergent transcript                                           |
| GA    | cg21246072 | 2.01E-05 | 0.002613351 | FOR0.01      | 17  | 38295894  | MSL1;CASC3                        | MSL1 protein;protein CASC3                                                      | TSS5000;TSS5000;TSS5000;TSS  | 17       | CASC3        | protein CASC3                                                           |
| GA    | cg21251140 | 1.01E-05 | 0.003460796 | FOR0.01      | 2   | 181544642 |                                   |                                                                                 |                              | -12188   | SCHLAP1      | SWI/SNF complex antagonist associated with prostate cancer 1            |
| GA    | cg21281009 | 2.76E-05 | 0.00682796  | FOR0.01      | 18  | 14748298  | ANKRD30B                          | ankyrin repeat domain-containing protein 30B                                    | 5'UTR;Body                   | 128      | ANKRD30B     | ankyrin repeat domain-containing protein 30B                            |
| GA    | cg21308575 | 7.70E-07 | 0.000555281 | FOR0.01      | 19  | 6887544   | ADGRE1                            | adhesion G protein-coupled receptor E1 precursor                                | TSS200;TSS200;TSS200;TSS200  | -45      | ADGRE1       | adhesion G protein-coupled receptor E1 precursor                        |
| GA    | cg21321372 | 1.66E-05 | 0.004943295 | FOR0.01      | 4   | 141264456 | SCOC;SCOC-AS1                     | short coiled-coil protein;SCOC antisense RNA 1                                  | Body;Body;TSS200;TSS200;TSS  | -140     | SCOC         | short coiled-coil protein                                               |
| GA    | cg21339822 | 4.22E-05 | 0.009017792 | FOR0.01      | 12  | 101988803 | MYBP8C                            | myosin-binding protein C, slow-type isoform 5                                   | 5'UTR;5'UTR;5'UTR;5'UTR;5'UT | 55       | MYBP8C       | myosin-binding protein C, slow-type isoform 5                           |
| GA    | cg21363348 | 7.41E-06 | 0.00138877  | FOR0.01      | 7   | 134832221 | CYREN;TMEM140                     | cell cycle regulator of non-homologous end joining;transmembrane protein        | TSS1500                      | -602     | TMEM140      | transmembrane protein 140 precursor                                     |
| GA    | cg21376733 | 1.31E-10 | 9.68E-07    | BF FOR0.01   | 12  | 54891636  | NCKAP1L                           | nck-associated protein 1-like                                                   | 1stExon;TSS1500              | 101      | NCKAP1L      | nck-associated protein 1-like                                           |
| GA    | cg21387281 | 3.61E-12 | 6.45E-08    | BF FOR0.01   | 20  | 61435439  | MRGBP;OGRF-AS1;OGRF               | MRG/MORF4-binding protein;OGRF antisense RNA 1;opioid growth factor             | TSS5000;TSS5000;Body;TSS1500 | -747     | OGRF         | opioid growth factor receptor                                           |
| GA    | cg21394729 | 2.28E-07 | 0.000223049 | FOR0.01      | 15  | 31316860  | TRPM1                             | transient receptor potential cation channel subfamily M member 1 isoform        | Body;Body;Body               | -33029   | MTMR10       | myotubularin-related protein 10                                         |
| GA    | cg21404980 | 1.68E-06 | 0.000984026 | FOR0.01      | 8   | 144599027 | ZC3H3                             | zinc finger CCH domain-containing protein 3                                     | Body                         | -10609   | SNORD149     | small nucleolar RNA, C/D box 149                                        |
| GA    | cg21415227 | 1.27E-05 | 0.00408918  | FOR0.01      | 11  | 13985911  | SPON1                             | spondin-1 precursor                                                             | Body                         | 1642</   |              |                                                                         |

Table S9. Differentially methylated CpG sites associated with GA or BW

| Trait | #cpG       | p        | fdr         | significance | chr | pos.hg19  | gene.llumina                            | gene.description                                                              | locations                       | dist2TSS | gene.nearest | gene.description                                                 |
|-------|------------|----------|-------------|--------------|-----|-----------|-----------------------------------------|-------------------------------------------------------------------------------|---------------------------------|----------|--------------|------------------------------------------------------------------|
| GA    | cg21610439 | 6.69E-07 | 0.000498397 | FR0.01       | 2   | 129251614 |                                         |                                                                               |                                 | -175127  | HS6T1        | heparan-sulfate 6-O-sulfotransferase 1                           |
| GA    | cg21618521 | 1.66E-05 | 0.00423978  | FR0.01       | 6   | 33245770  | RP518:BGAL4;WDR46                       | 40S ribosomal protein S18;beta-1,3-galactosyltransferase 4;WD repeat-cont     | TESS000;1stExon;TESS000;TES     | 871      | B3GALT4      | beta-1,3-galactosyltransferase 4                                 |
| GA    | cg21644740 | 3.83E-05 | 0.00852482  | FR0.01       | 6   | 29599248  | GABBR1                                  | gamma-aminobutyric acid type B receptor subunit 1 precursor                   | TESS000;5'UTR;Body;Body         | 1664     | GABBR1       | gamma-aminobutyric acid type B receptor subunit 1 precursor      |
| GA    | cg21674813 | 2.45E-05 | 0.006370954 | FR0.01       | 2   | 220425073 | OBSC1                                   | obscurin-like protein 1                                                       | Body;Body;TESS000               | 11188    | OBSC1        | obscurin-like protein 1                                          |
| GA    | cg21686577 | 1.58E-06 | 0.000943112 | FR0.01       | 7   | 75909905  | SRRM3                                   | serine/arginine repetitive matrix protein 3 isoform a                         | Body;Body                       | 22384    | HSBP1        | heat shock protein beta-1                                        |
| GA    | cg21695710 | 2.26E-07 | 0.000227277 | FR0.01       | 17  | 48234718  | PPP1R9B                                 | protein phosphatase 1, regulatory (inhibitor) subunit 9B                      | Body                            | 3391     | PPP1R9B      | protein phosphatase 1, regulatory (inhibitor) subunit 9B         |
| GA    | cg21710324 | 1.68E-05 | 0.004981885 | FR0.01       | 1   | 226069189 | TMEM63A;LEFTY1                          | CSC1-like protein 1;left-right determination factor 1 precursor               | Body;TESS000                    | 891      | TMEM63A      | CSC1-like protein 1                                              |
| GA    | cg21788755 | 4.73E-08 | 6.72E-05    | BF FR0.01    | 3   | 48508391  | ATRIP;ATRIP-TREX1;TREX1;SHISA5          | ATR-interacting protein;ATRIP-TREX1 readthrough;three-prime repair exonu      | TESS000;3'UTR;3'UTR;Body;3'U    | 763      | TREX1        | three-prime repair exonuclease 1 isoform c                       |
| GA    | cg21813747 | 4.24E-06 | 0.00187778  | FR0.01       | 1   | 19969931  | MICOS10-NBL1;NBL1                       | C1orf151-NBL1 read-through protein isoform a;Nbl1p                            | Body;Body;Body;Body;5'UTR;T     | 29       | NBL1         | Nbl1p                                                            |
| GA    | cg21829239 | 3.84E-05 | 0.008536054 | FR0.01       | 1   | 166068184 | SLAMF1                                  | signaling lymphocytic activation molecule precursor                           | Body;Body;Body;Body;Body        | 8650     | SLAMF1       | signaling lymphocytic activation molecule precursor              |
| GA    | cg21890025 | 9.43E-08 | 0.000116866 | BF FR0.01    | 7   | 1084594   | C7orf50;GPR146                          | uncharacterized protein C7orf50 isoform c;probable G-protein coupled rece     | Body;Body;Body;Body;Body;Bo     | 413      | GPR146       | probable G-protein coupled receptor 146                          |
| GA    | cg21892295 | 3.97E-05 | 0.008705032 | FR0.01       | 12  | 121157589 | UNC119B;MIR4700                         | protein unc-119 homolog B;microRNA 4700                                       | Body;TESS000                    | -3406    | MIR4700      | microRNA 4700                                                    |
| GA    | cg21892720 | 3.81E-06 | 0.001745616 | FR0.01       | 19  | 54877827  | LAIR1                                   | leukocyte-associated immunoglobulin-like receptor 1 isoform g                 | TESS1500;TESS1500;TESS1500;TSS  | -1289    | LAIR1        | leukocyte-associated immunoglobulin-like receptor 1 isoform g    |
| GA    | cg21932231 | 9.41E-08 | 0.000116886 | BF FR0.01    | 2   | 36668864  | CRIM1                                   | cysteine-rich motor neuron 1 protein precursor                                | Body                            | 85944    | CRIM1        | cysteine-rich motor neuron 1 protein precursor                   |
| GA    | cg21936555 | 1.22E-07 | 0.000140589 | FR0.01       | 17  | 79386428  | BAHCC1                                  | BAH and coiled-coil domain-containing protein 1 isoform 1                     | Body                            | -11850   | MIR4740      | microRNA 4740                                                    |
| GA    | cg21937377 | 6.39E-08 | 8.51E-05    | BF FR0.01    | 3   | 194888750 | XXYLT1;XXYLT1-AS2                       | xyloside xylosyltransferase 1;XXYLT1 antisense RNA 2                          | Body;Body;Body;Body             | 1151     | XXYLT1-AS2   | XXYLT1 antisense RNA 2                                           |
| GA    | cg21941821 | 7.75E-06 | 0.002879728 | FR0.01       | 22  | 39712633  | PNL3;SNORD83B;SNORD83A;SNORD139;SNORD43 | ribosomal protein L3;small nuclear RNA, C/D box 83B; small nuclear RNA,       | Body;Body;TESS5000;TESS1500;T   | 268      | SNORD139     | small nuclear RNA, C/D box 139                                   |
| GA    | cg21946006 | 6.45E-06 | 0.002544626 | FR0.01       | 2   | 8817010   | ID2-AS1                                 | ID2 antisense RNA 1                                                           | Body;TESS000                    | 4981     | ID2-AS1      | ID2 antisense RNA 1                                              |
| GA    | cg21990144 | 2.78E-07 | 0.000260126 | FR0.01       | 2   | 20172666  | CLK1                                    | dual specificity protein kinase CLK1                                          | Body;Body;Body;Body             | 2618     | CLK1         | dual specificity protein kinase CLK1                             |
| GA    | cg22000050 | 3.25E-05 | 0.00760174  | FR0.01       | 13  | 53425961  | PCDH8                                   | protocadherin-8 precursor                                                     | TESS000;TESS000                 | -3186    | PCDH8        | protocadherin-8 precursor                                        |
| GA    | cg22000727 | 6.19E-11 | 5.82E-07    | BF FR0.01    | 6   | 3459199   | SLC22A23;LOC643327                      | solute carrier family 22 member 23;uncharacterized LOC643327                  | TESS000;TESS000;Body            | -2406    | SLC22A23     | solute carrier family 22 member 23                               |
| GA    | cg22001211 | 6.43E-07 | 0.000485327 | FR0.01       | 2   | 61766532  | XPO1                                    | exportin-1                                                                    | TESS1500                        | -1041    | XPO1         | exportin-1                                                       |
| GA    | cg22026450 | 4.91E-05 | 0.00994754  | FR0.01       | 1   | 145476687 | ANKRD34A;LIX1L                          | ankyrin repeat domain-containing protein 34A;LIX1-like protein                | TESS000;TESS1500                | -381     | LIX1L        | LIX1-like protein                                                |
| GA    | cg22062555 | 2.80E-05 | 0.006946891 | FR0.01       | 19  | 45664251  | NKPD1;TRAPPC6A                          | NTPase KAP family P-loop domain-containing protein 1;trafficking protein pa   | TESS1500;TESS000;TESS000;TES    | -843     | NKPD1        | NTPase KAP family P-loop domain-containing protein 1             |
| GA    | cg22065124 | 1.31E-06 | 0.000820198 | FR0.01       | 13  | 73649955  | KLF5                                    | Kruppeel-like factor 5                                                        | Body;Body                       | 16813    | KLF5         | Kruppeel-like factor 5                                           |
| GA    | cg22068629 | 5.49E-13 | 1.75E-08    | BF FR0.01    | 19  | 2446633   | LMNB2                                   | lamin-B2                                                                      | Body                            | 10324    | LMNB2        | lamin-B2                                                         |
| GA    | cg22084563 | 4.19E-05 | 0.008985584 | FR0.01       | 17  | 7255046   | ACAP1;KCTD11;TMEM95                     | arf-GAP with coiled-coil, ANK repeat and PH domain-containing protein 1;BT    | TESS000;TESS200;TESS1500;TSS    | -161     | KCTD11       | BTB/POZ domain-containing protein KCTD11                         |
| GA    | cg22102703 | 2.43E-05 | 0.006338662 | FR0.01       | 21  | 43346284  | CZCD2                                   | C2 domain-containing protein 2                                                | Body;Body                       | 528      | CZCD2        | C2 domain-containing protein 2                                   |
| GA    | cg22123784 | 4.11E-05 | 0.008873918 | FR0.01       | 8   | 144437507 | TOP1MT                                  | DNA topoisomerase 1, mitochondrial isoform 1 precursor                        | Body;Body                       | 4640     | TOP1MT       | DNA topoisomerase 1, mitochondrial isoform 1 precursor           |
| GA    | cg22130057 | 3.10E-05 | 0.007487708 | FR0.01       | 8   | 123983782 | ZNF2                                    | zinc fingers and homeobox protein 2                                           | TESS000;TESS200                 | 113      | ZNF2         | zinc fingers and homeobox protein 2                              |
| GA    | cg22130205 | 1.94E-06 | 0.001077051 | FR0.01       | 18  | 77139296  | ATP9B                                   | probable phospholipid-transporting ATPase 11B isoform 2                       | TESS000;TESS000;TESS000         | -16633   | NFATC1       | nuclear factor of activated T-cells, cytoplasmic 1 isoform D     |
| GA    | cg22140866 | 8.33E-07 | 0.000588745 | FR0.01       | 13  | 59686676  |                                         |                                                                               | TESS000;TESS000;TESS000         | -879425  | LINC00374    | long intergenic non-protein coding RNA 374                       |
| GA    | cg22151768 | 1.81E-05 | 0.005259275 | FR0.01       | 12  | 1702874   | FBXL14                                  | F-box/LRR-repeat protein 14                                                   | 1stExon                         | 873      | FBXL14       | F-box/LRR-repeat protein 14                                      |
| GA    | cg22160883 | 1.68E-05 | 0.004971678 | FR0.01       | 5   | 138609222 | SNHG4;MATR3;SNORA74D                    | small nuclear RNA host gene 4;matrin-3;small nuclear RNA, H/ACA box 1         | TESS1500;TESS1500;TESS1500;TSS  | -218     | SNHG4        | small nuclear RNA host gene 4                                    |
| GA    | cg22169053 | 1.72E-08 | 3.13E-05    | BF FR0.01    | 1   | 32281460  | SPOCD1                                  | SPOC domain-containing protein 1 isoform 1                                    | Body;Body;Body                  | 192      | SPOCD1       | SPOC domain-containing protein 1 isoform 1                       |
| GA    | cg22218709 | 1.18E-10 | 9.28E-07    | BF FR0.01    | 7   | 4723740   | FOCK1                                   | forkhead box protein K1                                                       | Body                            | 1815     | FOCK1        | forkhead box protein K1                                          |
| GA    | cg22225886 | 1.27E-05 | 0.004080207 | FR0.01       | 8   | 102074434 | FLJ42969                                | uncharacterized LOC441374                                                     | Body                            | 10153    | FLJ42969     | uncharacterized LOC441374                                        |
| GA    | cg22238122 | 1.85E-05 | 0.005323382 | FR0.01       | 1   | 164546143 | PBX1                                    | pre-B-cell leukemia transcription factor 1                                    | Body;Body;Body;Body;Body        | 17185    | PBX1         | pre-B-cell leukemia transcription factor 1                       |
| GA    | cg22240348 | 3.35E-06 | 0.001585151 | FR0.01       | 21  | 46975805  | SLC19A1                                 | reduced folate transporter                                                    | Body                            | 7134     | SLC19A1      | reduced folate transporter                                       |
| GA    | cg22248382 | 3.88E-05 | 0.008597948 | FR0.01       | 17  | 29758931  | RAB11FIP4                               | rab11 family-interacting protein 4 isoform 2                                  | Body                            | 40239    | RAB11FIP4    | rab11 family-interacting protein 4 isoform 2                     |
| GA    | cg22277154 | 6.61E-08 | 8.75E-05    | BF FR0.01    | 13  | 31020468  |                                         |                                                                               |                                 | 17996    | HMG81        | high mobility group protein B1                                   |
| GA    | cg22277912 | 1.09E-07 | 0.000129826 | BF FR0.01    | 12  | 10896008  | ISCU                                    | iron-sulfur cluster assembly enzyme ISCU, mitochondrial                       | Body;Body;Body;Body;Body;Bo     | 4770     | ISCU         | iron-sulfur cluster assembly enzyme ISCU, mitochondrial          |
| GA    | cg22324029 | 1.57E-05 | 0.004752088 | FR0.01       | 6   | 32908466  | HLA-DMB                                 | HLA class II histocompatibility antigen, DM beta chain precursor              | Body                            | 329      | HLA-DMB      | HLA class II histocompatibility antigen, DM beta chain precursor |
| GA    | cg22369993 | 1.34E-05 | 0.004243425 | FR0.01       | 6   | 31848507  | SLC44A4;EHMT2                           | choline transporter-like protein 4;histone-lysine N-methyltransferase EHMT2   | TESS000;TESS000;TESS000;Body    | -1684    | SLC44A4      | choline transporter-like protein 4                               |
| GA    | cg22394932 | 1.90E-05 | 0.00539899  | FR0.01       | 1   | 2252794   | MORN1                                   | MORN repeat-containing protein 1 isoform 2                                    | 3'UTR                           | 31306    | LOC100129534 | small nuclear ribonucleoprotein polypeptide N pseudogene         |
| GA    | cg22356527 | 1.33E-05 | 0.00421869  | FR0.01       | 5   | 374425    | AHRH                                    | aryl hydrocarbon receptor repressor                                           | Body;Body                       | 68850    | EXOC3-AS1    | EXOC3 antisense RNA 1                                            |
| GA    | cg22365167 | 6.09E-10 | 2.82E-06    | BF FR0.01    | 11  | 62306861  | AHNAK                                   | neuroblast differentiation-associated protein AHNAK isoform 1                 | Body;Body;Body;Body             | 6275     | AHNAK        | neuroblast differentiation-associated protein AHNAK isoform 1    |
| GA    | cg22380007 | 2.38E-05 | 0.006244332 | FR0.01       | 3   | 59718904  |                                         |                                                                               |                                 | -74681   | LOC339902    | hCG1813818                                                       |
| GA    | cg22407942 | 2.09E-05 | 0.005779049 | FR0.01       | 7   | 22894828  | SNHG26;SNORD93                          | small nuclear RNA host gene 26;small nuclear RNA, C/D box 93                  | Body;TESS1500                   | 970      | SNHG26       | small nuclear RNA host gene 26                                   |
| GA    | cg22417398 | 4.57E-06 | 0.001973182 | FR0.01       | 11  | 65293094  | SCYL1                                   | N-terminal kinase-like protein                                                | Body;Body                       | 541      | SCYL1        | N-terminal kinase-like protein                                   |
| GA    | cg22462240 | 1.76E-05 | 0.00516726  | FR0.01       | 17  | 76962663  | LGALS3BP                                | galectin-3 binding protein precursor                                          | TESS000                         | 13342    | LGALS3BP     | galectin-3 binding protein precursor                             |
| GA    | cg22480558 | 1.54E-10 | 1.07E-06    | BF FR0.01    | 5   | 150461211 | TNIP1                                   | TNFAIP3-interacting protein 1                                                 | TESS1500;TESS1500;TESS1500;TSS  | -566     | TNIP1        | TNFAIP3-interacting protein 1                                    |
| GA    | cg22498676 | 4.98E-06 | 0.002096264 | FR0.01       | 1   | 226254585 | H3-3A                                   | histone H3.3                                                                  | Body                            | 4169     | H3-3A        | histone H3.3                                                     |
| GA    | cg22499797 | 3.43E-08 | 5.34E-05    | BF FR0.01    | 17  | 30585906  |                                         |                                                                               |                                 | -6944    | RHBDL3       | rhomboid-related protein 3                                       |
| GA    | cg22500132 | 3.16E-08 | 5.02E-05    | BF FR0.01    | 17  | 155162752 | MUC1;MIR92B;THBS3                       | mucin-1 isoform 8 precursor;microRNA 92b;thrombospondin-3 precursor           | TESS200;TESS200;TESS200;TESS200 | -16790   | MUC1         | mucin-1 isoform 8 precursor                                      |
| GA    | cg22502023 | 3.33E-06 | 0.001579973 | FR0.01       | 1   | 55946195  | CUEDC1                                  | CUE domain-containing protein 1                                               | Body;Body                       | -18700   | MRPS23       | 28S ribosomal protein S23, mitochondrial                         |
| GA    | cg22507354 | 2.08E-05 | 0.005746234 | FR0.01       | 17  | 62493832  | POLG2;DDX5;MIR3064;MIR5047              | DNA polymerase subunit gamma-2, mitochondrial;probable ATP-dependent          | TESS000;TESS000;TESS000;TES     | -660     | POLG2        | DNA polymerase subunit gamma-2, mitochondrial                    |
| GA    | cg22508782 | 1.25E-05 | 0.004054231 | FR0.01       | 3   | 49028594  | ARIH2;PAHTM                             | E3 ubiquitin-protein ligase ARIH2;transmembrane prolyl 4-hydroxylase isofo    | TESS000;TESS000;TESS000;TES     | 921      | PAHTM        | transmembrane prolyl 4-hydroxylase isoform c                     |
| GA    | cg22531371 | 4.36E-09 | 1.20E-05    | BF FR0.01    | 1   | 155162756 | MUC1;MIR92B;THBS3                       | mucin-1 isoform 8 precursor;microRNA 92b;thrombospondin-3 precursor           | TESS200;TESS200;TESS200;TESS200 | -50      | MUC1         | mucin-1 isoform 8 precursor                                      |
| GA    | cg22540532 | 3.81E-05 | 0.008507109 | FR0.01       | 4   | 140518177 |                                         |                                                                               |                                 | -40254   | SETD7        | histone-lysine N-methyltransferase SETD7 isoform 2               |
| GA    | cg22563987 | 4.01E-05 | 0.008741223 | FR0.01       | 17  | 76130496  | TMCC6;TMCC8                             | transmembrane channel-like protein 6;transmembrane channel-like protein       | TESS000;Body                    | -1988    | TMCC6        | transmembrane channel-like protein 6                             |
| GA    | cg22572362 | 4.33E-08 | 6.27E-05    | BF FR0.01    | 5   | 501938    | SLC9A3                                  | sodium/hydrogen exchanger 3 precursor                                         | Body;Body                       | 22626    | SLC9A3       | sodium/hydrogen exchanger 3 precursor                            |
| GA    | cg22606224 | 4.83E-08 | 6.83E-05    | BF FR0.01    | 19  | 12266489  | ZNF625-ZNF20;ZNF625                     | ZNF625-ZNF20 readthrough (NMD candidate);zinc finger protein 625              | Body;Body;Body                  | 1057     | ZNF625-ZNF20 | ZNF625-ZNF20 readthrough (NMD candidate)                         |
| GA    | cg22608507 | 6.75E-08 | 8.86E-05    | BF FR0.01    | 12  | 123379308 | VPS37B                                  | vacuolar protein sorting-associated protein 37B                               | Body                            | 1363     | VPS37B       | vacuolar protein sorting-associated protein 37B                  |
| GA    | cg22608655 | 1.30E-08 | 2.58E-05    | BF FR0.01    | 1   | 154933512 | PBXIP1;PYGO2;LOC101928120;SHC1          | pre-B-cell leukemia transcription factor-interacting protein 1 isoform 3;pygo | TESS000;TESS000;TESS000;Body    | -434     | LOC101928120 | uncharacterized protein LOC101928120                             |
| GA    | cg22618924 | 3.49E-06 | 0.001624215 | FR0.01       | 5   | 126054153 |                                         |                                                                               |                                 | 58027    | LMNB1-DT     | LMNB1 divergent transcript                                       |
| GA    | cg22622440 | 3.98E-06 | 0.001810717 | FR0.01       | 17  | 18088359  | ALKBH5                                  | RNA demethylase ALKBH5                                                        | Body                            | 1218     | ALKBH5       | RNA demethylase ALKBH5                                           |
| GA    | cg22642495 | 5.14E-09 | 1.38E-05    | BF FR0.01    | 19  | 10197856  | SHFL                                    | shifflins antiviral inhibitor of ribosomal frameshifting protein              | Body;Body                       | 864      | SHFL         | shifflins antiviral inhibitor of ribosomal frameshifting protein |
| GA    | cg22670503 | 8.43E-07 | 0.000592909 | FR0.01       | 10  | 49482695  | FRMPD2                                  | FERM and PDZ domain-containing protein 2 isoform 4                            | 5'UTR                           | 44       | FRMPD2       | FERM and PDZ domain-containing protein 2 isoform 4               |
| GA    | cg22679406 | 1.64E-06 | 0.000962731 | FR0.01       | 6   | 29599331  | GABBR1                                  | gamma-aminobutyric acid type B receptor subunit 1 precursor                   | TESS000;5'UTR;Body;Body         | 1581     | GABBR1       | gamma-aminobutyric acid type B receptor subunit 1 precursor      |
| GA    | cg22681074 | 1.04E-05 | 0.003510259 | FR0.01       | 1   | 228345324 | GJC2                                    | gap junction gamma-2 protein                                                  | Body                            | 7225     | IBAS7-DT     | IBAS7 divergent transcript                                       |
| GA    | cg22685502 | 7.11E-10 | 3.12E-06    | BF FR0.01    | 3   | 72496851  | RYBP                                    | ring and YY1 binding protein, isoform A                                       | TESS1500                        | -1077    | RYBP         | ring and YY1 binding protein, isoform A                          |
| GA    | cg22688566 | 8.76E-07 | 0.000607567 | FR0.01       | 17  | 27459835  | MYO18A                                  | unconventional myosin-XVIIIa isoform e                                        | Body;Body;Body;Body;Body;Bo     | 7572     | MYO18A       | unconventional myosin-XVIIIa isoform e                           |
| GA    | cg22720790 | 1.37E-05 | 0.004307873 | FR0.01       | 19  | 58716032  | ZNF274                                  | neurotrophin receptor-interacting factor homolog isoform d                    | Body;Body;Body;Body             | 21605    | ZNF274       | neurotrophin receptor-interacting factor homolog isoform d       |
| GA    | cg22729539 | 2.25E-06 | 0.001211942 | FR0.01       | 12  | 122519119 | MLXIP                                   | MLX-interacting protein isoform 2                                             | Body                            | 2458     | MLXIP        | MLX-interacting protein isoform 2                                |
| GA    | cg22734086 | 1.73E-06 | 0.001036065 | FR0.01       | 2   | 26785367  | OTOF;FAM166C                            | otoferlin;protein FAM166C                                                     | TESS000;TESS000;TESS200;TSS     | -87      | FAM166C      | protein FAM166C                                                  |
| GA    | cg22741244 | 4.33E-06 | 0.001899024 | FR0.01       | 2   | 239052286 | KLHL30                                  | kelch-like protein 30                                                         | Body                            | 4978     | KLHL30       | kelch-like protein 30                                            |
| GA    | cg22760304 | 8.68E-06 | 0.00311     |              |     |           |                                         |                                                                               |                                 |          |              |                                                                  |

Table S9. Differentially methylated CpG sites associated with GA or BW

| Trait | #cpg       | p        | fdr          | significance | chr | pos.hg19  | gene.illumina                           | gene.description                                                                       | locations                     | dist2TSS | gene.nearest    | gene.description                                                               |
|-------|------------|----------|--------------|--------------|-----|-----------|-----------------------------------------|----------------------------------------------------------------------------------------|-------------------------------|----------|-----------------|--------------------------------------------------------------------------------|
| GA    | cg22879583 | 3.84E-05 | 0.008548487  | FOR0.01      | 11  | 111750412 | FOXACB1;C11orf1                         | ferredoxin-fold anticodon-binding domain-containing protein 1;UPF0686 protein          | TSS1500;TSS1500;Body;Body     | 148      | C11orf1         | UPF0686 protein C11orf1 isoform 2                                              |
| GA    | cg22897141 | 1.95E-07 | 0.000197439  | FOR0.01      | 11  | 64577338  | MEN1                                    | menin                                                                                  | 1stExon;1stExon;1stExon;1stEx | 685      | MEN1            | menin                                                                          |
| GA    | cg22903402 | 1.63E-05 | 0.004861424  | FOR0.01      | 2   | 128366514 | MYO7B                                   | unconventional myosin-VIb                                                              | Body                          | -36924   | GRP17           | uracil nucleotide/cysteine leukotriene receptor                                |
| GA    | cg29419174 | 1.34E-05 | 0.004252885  | FOR0.01      | 2   | 56410011  | LOC100129434;CCDC85A                    | uncharacterized LOC100129434;coiled-coil domain-containing protein 85A                 | Body;TSS1500;TSS1500;TSS1500  | -1113    | CCDC85A         | coiled-coil domain-containing protein 85A                                      |
| GA    | cg23008153 | 4.74E-07 | 0.000386799  | FOR0.01      | 5   | 63461305  | RNF180                                  | E3 ubiquitin-protein ligase RNF180                                                     | TSS1500;TSS1500;TSS1500;TSS   | -364     | RNF180          | E3 ubiquitin-protein ligase RNF180                                             |
| GA    | cg23009780 | 3.38E-05 | 0.007800019  | FOR0.01      | 2   | 96774492  | ADRB2                                   | alpha-2B adrenergic receptor                                                           | TESS000                       | 7818     | ADRB2           | alpha-2B adrenergic receptor                                                   |
| GA    | cg23013850 | 3.52E-06 | 0.001635677  | FOR0.01      | 2   | 225266304 | FAM124B                                 | protein FAM124B                                                                        | 1stExon;1stExon               | 407      | FAM124B         | protein FAM124B                                                                |
| GA    | cg23014759 | 4.38E-06 | 0.001912728  | FOR0.01      | 1   | 147059047 | BC19                                    | B-cell CLL/lymphoma 9 protein                                                          | Body                          | 45777    | BC19            | B-cell CLL/lymphoma 9 protein                                                  |
| GA    | cg23024012 | 3.82E-07 | 0.000331261  | FOR0.01      | 13  | 45149706  | TSC22D1;TSC22D1-AS1                     | TSC22 domain family protein 1 isoform 3;TSC22D1 antisense RNA 1                        | 1stExon;1stExon;TSS1500       | -325     | TSC22D1-AS1     | TSC22D1 antisense RNA 1                                                        |
| GA    | cg23028178 | 1.90E-06 | 0.001066227  | FOR0.01      | 1   | 236229267 | NID1                                    | nidogen-1 precursor                                                                    | TSS1500                       | -877     | NID1            | nidogen-1 precursor                                                            |
| GA    | cg23041109 | 3.14E-06 | 0.001506851  | FOR0.01      | 13  | 29157934  | POMP                                    | proteasome maturation protein                                                          | TESS000                       | -75332   | POMP            | proteasome maturation protein                                                  |
| GA    | cg23042318 | 3.91E-05 | 0.008636129  | FOR0.01      | 19  | 1270330   | CIRBP-AS1;CIRBP                         | CIRBP antisense RNA 1;cold-inducible RNA-binding protein                               | TSS200;Body;Body;Body;Body    | -71      | CIRBP-AS1       | CIRBP antisense RNA 1                                                          |
| GA    | cg23043544 | 2.57E-05 | 0.006574236  | FOR0.01      | 7   | 2124092   | MAD1L1;SNORA114                         | mitotic spindle assembly checkpoint protein MAD1;small nucleolar RNA, H/ACA box 114    | Body;Body;Body;Body;Body;TE   | 4595     | SNORA114        | small nucleolar RNA, H/ACA box 114                                             |
| GA    | cg23044005 | 2.38E-05 | 0.006244332  | FOR0.01      | 7   | 22588840  | PCDH1                                   | protocadherin-1                                                                        | TESS000                       | -14115   | LOC100506178    | uncharacterized LOC100506178                                                   |
| GA    | cg23044186 | 9.10E-06 | 0.003117122  | FOR0.01      | 5   | 141228416 | PCDH1                                   | protocadherin-1                                                                        | TESS000                       | 17351    | PCDH1           | protocadherin-1                                                                |
| GA    | cg23044884 | 1.59E-07 | 0.000170296  | FOR0.01      | 8   | 30245145  | RBPMS-AS1;RBPMS                         | RBPMS antisense RNA 1;RNA-binding protein with multiple splicing                       | TSS5000;Body;Body;Body;Body   | -2228    | RBPMS-AS1       | RBPMS antisense RNA 1                                                          |
| GA    | cg23050300 | 1.28E-06 | 0.000807406  | FOR0.01      | 1   | 3281321   | PRDM16                                  | histone-lysine N-methyltransferase PRDM16 isoform 2                                    | Body;Body                     | -89007   | ARHGCF16        | rho guanine nucleotide exchange factor 16                                      |
| GA    | cg23051299 | 1.02E-05 | 0.003484217  | FOR0.01      | 2   | 7593898   | GCFC2                                   | GC-rich sequence DNA-binding factor 2                                                  | TSS1500;TSS1500;TSS1500       | -248     | GCFC2           | GC-rich sequence DNA-binding factor 2                                          |
| GA    | cg23053723 | 2.86E-05 | 0.007057248  | FOR0.01      | 17  | 63135251  | RG59                                    | regulator of G-protein signaling 9 isoform 2                                           | 3'UTR;3'UTR;5'UTR             | -34      | RG59            | regulator of G-protein signaling 9 isoform 2                                   |
| GA    | cg23066564 | 6.33E-06 | 0.002514288  | FOR0.01      | 22  | 46481734  | MIRLET7BHG                              | MIRLET7B host gene                                                                     | TSS200;TSS200                 | 142      | MIRLET7BHG      | MIRLET7B host gene                                                             |
| GA    | cg23068939 | 2.74E-05 | 0.006842589  | FOR0.01      | 1   | 112016586 | C1orf162                                | transmembrane protein C1orf162 isoform 3                                               | TSS200;TSS200;TSS200          | -19      | C1orf162        | transmembrane protein C1orf162 isoform 3                                       |
| GA    | cg23091302 | 7.75E-07 | 0.000557499  | FOR0.01      | 3   | 19389409  | CNNH8                                   | potassium voltage-gated channel subfamily H member 8                                   | Body                          | -32988   | MIR4791         | microRNA 4791                                                                  |
| GA    | cg23098018 | 2.42E-05 | 0.006316368  | FOR0.01      | 1   | 9775755   | PIK3CD                                  | phosphatidylinositol 4,5-bisphosphate 3-kinase catalytic subunit delta isoform         | Body;Body;Body                | 24231    | PIK3CD          | phosphatidylinositol 4,5-bisphosphate 3-kinase catalytic subunit delta isoform |
| GA    | cg23100720 | 2.61E-05 | 0.006648139  | FOR0.01      | 6   | 155770386 | NOX3                                    | NADPH oxidase 3                                                                        | Body                          | 6587     | NOX3            | NADPH oxidase 3                                                                |
| GA    | cg23141902 | 1.83E-06 | 0.001038268  | FOR0.01      | 22  | 39712694  | RPL3;SNORD83B;SNORD83A;SNORD139;SNORD43 | ribosomal protein L3;small nucleolar RNA, C/D box 83B;small nucleolar RNA, C/D box 139 | Body;Body;TSS5000;TSS1500;T   | 207      | SNORD139        | small nucleolar RNA, C/D box 139                                               |
| GA    | cg23152055 | 4.39E-05 | 0.009244415  | FOR0.01      | 15  | 75661059  | MAN2C1;SIN3A                            | alpha-mannosidase 2C1;paired amphipathic helix protein Sin3a                           | TSS200;TSS200;TSS200;TSS200   | -91      | MAN2C1          | alpha-mannosidase 2C1                                                          |
| GA    | cg23157190 | 1.68E-05 | 0.004981885  | FOR0.01      | 2   | 75060880  | HK2                                     | hexokinase-2                                                                           | TSS1500;TSS1500               | -373     | HK2             | hexokinase-2                                                                   |
| GA    | cg23166970 | 3.91E-05 | 0.008636129  | FOR0.01      | 3   | 182817578 | MCCC1                                   | methylcrotonoyl-CoA carboxylase subunit alpha, mitochondrial                           | TSS1500;TSS1500;TSS1500;TSS   | -203     | MCCC1           | methylcrotonoyl-CoA carboxylase subunit alpha, mitochondrial                   |
| GA    | cg23180593 | 4.16E-05 | 0.00894807   | FOR0.01      | 13  | 111301467 | CAR52                                   | probable cysteine--HNA ligase, mitochondrial isoform 3                                 | Body;Body;Body;Body           | 33513    | NANO            | ATP-dependent [S]-NAD(P)H-hydrate dehydratase isoform 1                        |
| GA    | cg23181773 | 1.37E-05 | 0.004317275  | FOR0.01      | 17  | 38639716  | ATP2A3                                  | sarcolemmal/endoplasmic reticulum calcium ATPase 3                                     | Body;Body;Body;Body;Body;Bo   | 325      | ATP2A3          | sarcolemmal/endoplasmic reticulum calcium ATPase 3                             |
| GA    | cg23186098 | 1.15E-05 | 0.003783448  | FOR0.01      | 6   | 32056119  | TNXB                                    | tensin-X precursor                                                                     | Body;Body                     | 20996    | TNXB            | tensin-X precursor                                                             |
| GA    | cg23188579 | 2.54E-06 | 0.001299485  | FOR0.01      | 4   | 141264558 | SCOC-SCOC-AS1                           | short coiled-coil protein;SCOC-antisense RNA 1                                         | Body;Body;TSS200;TSS200;TSS   | -38      | SCOC            | short coiled-coil protein                                                      |
| GA    | cg23210521 | 1.82E-06 | 0.001035738  | FOR0.01      | 4   | 95680414  | BMPR1B-DT;BMPR1B                        | BMPR1B divergent transcript;bone morphogenetic protein receptor type-1B                | TSS5000;Body                  | 1309     | BMPR1B          | bone morphogenetic protein receptor type-1B                                    |
| GA    | cg23225748 | 2.31E-05 | 0.006126008  | FOR0.01      | 10  | 80062665  | LINC00595                               | intergenic non-protein coding RNA 595                                                  | TESS000                       | 35567    | LINC00595       | intergenic non-protein coding RNA 595                                          |
| GA    | cg23229770 | 4.05E-05 | 0.008788927  | FOR0.01      | 2   | 129491004 | LOC101927881                            | uncharacterized LOC101927881                                                           | TESS000                       | -131169  | LOC101927881    | uncharacterized LOC101927881                                                   |
| GA    | cg23238677 | 1.93E-05 | 0.005459259  | FOR0.01      | 2   | 170157334 | LRP2                                    | low-density lipoprotein receptor-related protein 2 precursor                           | Body                          | 61710    | LRP2            | low-density lipoprotein receptor-related protein 2 precursor                   |
| GA    | cg23239828 | 1.17E-05 | 0.003854291  | FOR0.01      | 5   | 442821    | AHRH;EXOC3-AS1;EXOC3                    | aryl hydrocarbon receptor repressor;EXOC3 antisense RNA 1;exocyst complex              | TESS000;TESS000;Body;TSS1500  | -454     | EXOC3-AS1       | EXOC3 antisense RNA 1                                                          |
| GA    | cg23254047 | 1.24E-05 | 0.004021037  | FOR0.01      | 10  | 38264940  | ZNF25                                   | zinc finger protein 25                                                                 | TSS200;Body;Body;Body;Body    | -32      | ZNF25           | zinc finger protein 25                                                         |
| GA    | cg23255283 | 2.24E-06 | 0.001209617  | FOR0.01      | 18  | 74240582  | LINC00908                               | long intergenic non-protein coding RNA 908                                             | TSS200                        | -29      | LINC00908       | long intergenic non-protein coding RNA 908                                     |
| GA    | cg23263226 | 4.37E-06 | 0.00191161   | FOR0.01      | 17  | 78226839  | SLC26A11                                | sodium-independent sulfate anion transporter                                           | 3'UTR;3'UTR;3'UTR;3'UTR       | -7811    | RNF213          | E3 ubiquitin-protein ligase RNF213 isoform 2                                   |
| GA    | cg23291039 | 1.13E-05 | 0.003756248  | FOR0.01      | 4   | 25808901  | SELL13                                  | protein sel-1 homolog 3                                                                | Body;Body;Body                | 55709    | SELL13          | protein sel-1 homolog 3                                                        |
| GA    | cg23314506 | 3.89E-05 | 0.008614143  | FOR0.01      | 13  | 46636917  | TC3H13;CPB2-AS1;CPB2                    | zinc finger CCH domain-containing protein 13 isoform 1;CPB2 antisense RNA              | TSS200;TSS200;TSS200;TSS200   | -36      | TC3H13          | zinc finger CCH domain-containing protein 13 isoform 1                         |
| GA    | cg23329272 | 2.49E-05 | 0.006436041  | FOR0.01      | 5   | 180085924 | FLT4                                    | vascular endothelial growth factor receptor 3 precursor                                | TSS200                        | -9324    | FLT4            | vascular endothelial growth factor receptor 3 precursor                        |
| GA    | cg23334662 | 3.83E-06 | 0.001752342  | FOR0.01      | 2   | 198540518 | RFTN2                                   | raftin-2                                                                               | TSS1500                       | -207     | RFTN2           | raftin-2                                                                       |
| GA    | cg23348081 | 1.48E-06 | 0.000892111  | FOR0.01      | 12  | 14413690  | ATF7IP                                  | activating transcription factor 7-interacting protein 1                                | TESS000                       | -104875  | ATF7IP          | activating transcription factor 7-interacting protein 1                        |
| GA    | cg23359665 | 2.51E-06 | 0.001291469  | FOR0.01      | 6   | 32120907  | PRRT1;LOC100507547;PPT2;PPT2-EGFL8      | proline-rich transmembrane protein 1;uncharacterized LOC100507547;lyso                 | TSS200;TSS1500;Body;Body;Bo   | -47      | PRRT1           | proline-rich transmembrane protein 1                                           |
| GA    | cg23372544 | 2.97E-06 | 0.001496967  | FOR0.01      | 19  | 23387068  | ZNF724                                  | zinc finger protein 724 isoform 1                                                      | TESS000                       | 46128    | ZNF724          | zinc finger protein 724 isoform 1                                              |
| GA    | cg23378033 | 1.39E-08 | 2.71E-05 BF  | FOR0.01      | 12  | 65672031  | MSRB3                                   | methionine-R-sulfoxide reductase B3                                                    | TSS1500;TSS1500;TSS1500;TSS   | -431     | MSRB3           | methionine-R-sulfoxide reductase B3                                            |
| GA    | cg23384027 | 4.73E-07 | 0.000386799  | FOR0.01      | 12  | 54688344  | NFE2                                    | transcription factor NF-E2 45 kDa subunit                                              | Body;Body;Body                | 1219     | NFE2            | transcription factor NF-E2 45 kDa subunit                                      |
| GA    | cg23391324 | 1.52E-05 | 0.00464149   | FOR0.01      | 15  | 73344290  | NEO1                                    | neogenin                                                                               | TSS1500;TSS1500;TSS1500       | -513     | NEO1            | neogenin                                                                       |
| GA    | cg23462152 | 2.97E-05 | 0.00719646   | FOR0.01      | 14  | 91723888  | GRP68                                   | ovarian cancer G-protein coupled receptor 1                                            | TSS5000;TSS5000               | -3664    | GRP68           | ovarian cancer G-protein coupled receptor 1                                    |
| GA    | cg23463310 | 1.16E-06 | 0.000747427  | FOR0.01      | 11  | 65188784  | NEAT1                                   | nuclear paraspeckle assembly transcript 1                                              | TSS5000;TSS1500               | -1484    | NEAT1           | nuclear paraspeckle assembly transcript 1                                      |
| GA    | cg23471393 | 1.19E-06 | 0.005765289  | FOR0.01      | 17  | 79797038  | PPP1R27;P4HB                            | protein phosphatase 1 regulatory subunit 27;protein disulfide-isomerase pre            | TSS5000;TSS5000               | -4112    | PPP1R27         | protein phosphatase 1 regulatory subunit 27                                    |
| GA    | cg23474211 | 1.84E-05 | 0.005308068  | FOR0.01      | 7   | 88388646  | ZNF804B                                 | zinc finger protein 804B                                                               | TSS1500                       | 367      | ZNF804B         | zinc finger protein 804B                                                       |
| GA    | cg23480938 | 2.43E-05 | 0.006311797  | FOR0.01      | 12  | 111619196 | CUK2                                    | homeobox protein cut-like 2 isoform 2                                                  | Body;Body                     | 813      | CUK2            | homeobox protein cut-like 2 isoform 2                                          |
| GA    | cg23490300 | 9.84E-06 | 0.003386846  | FOR0.01      | 2   | 41461406  | LINC01913                               | long intergenic non-protein coding RNA 1913                                            | TESS000                       | -64328   | LINC01913       | long intergenic non-protein coding RNA 1913                                    |
| GA    | cg23513600 | 1.42E-05 | 0.004423253  | FOR0.01      | 3   | 171171401 | TNKK                                    | TRAF2 and NCK-interacting protein kinase                                               | Body;Body;Body;Body;Body;Bo   | 6793     | TNKK            | TRAF2 and NCK-interacting protein kinase                                       |
| GA    | cg23516002 | 1.41E-06 | 0.000864695  | FOR0.01      | 7   | 128099617 | HILPDA                                  | hypoxia-inducible lipid droplet-associated protein precursor                           | TESS000;TESS000               | 3686     | HILPDA          | hypoxia-inducible lipid droplet-associated protein precursor                   |
| GA    | cg23523668 | 3.02E-05 | 0.007272241  | FOR0.01      | 11  | 65194989  | NEAT1                                   | nuclear paraspeckle assembly transcript 1                                              | TESS000;Body                  | 4721     | NEAT1           | nuclear paraspeckle assembly transcript 1                                      |
| GA    | cg23523980 | 3.00E-05 | 0.007230021  | FOR0.01      | 1   | 35250735  | GJB3                                    | gap junction beta-3 protein                                                            | 1stExon;1stExon               | 2867     | GJB3            | gap junction beta-3 protein                                                    |
| GA    | cg23548163 | 9.18E-06 | 0.003230315  | FOR0.01      | 19  | 46807119  | HIF3A                                   | hypoxia-inducible factor 3-alpha                                                       | Body;Body;Body;Body           | 244      | HIF3A           | hypoxia-inducible factor 3-alpha                                               |
| GA    | cg23560159 | 4.68E-05 | 0.009616031  | FOR0.01      | 6   | 32805748  | TAP2;PSMB8                              | antigen peptide transporter 2;proteasome subunit beta type-8                           | 1stExon;1stExon;TESS000;TESS  | 799      | TAP2            | antigen peptide transporter 2                                                  |
| GA    | cg23583454 | 1.24E-07 | 0.000141653  | FOR0.01      | 6   | 30582333  | PPP1R10;MRPS18B                         | serine/threonine-protein phosphatase 1 regulatory subunit 10;28S ribosoma              | Body;Body;TSS5000             | 2687     | PPP1R10         | serine/threonine-protein phosphatase 1 regulatory subunit 10                   |
| GA    | cg23584647 | 3.93E-05 | 0.008645923  | FOR0.01      | 11  | 61717191  | BEST1                                   | bestrophin-1                                                                           | TSS200;TSS1500;TSS1500;TSS1   | -101     | BEST1           | bestrophin-1                                                                   |
| GA    | cg23588384 | 3.07E-08 | 4.92E-05 BF  | FOR0.01      | 8   | 144684634 | EEF1D;TIGD5;PYCR3                       | elongation factor 1-delta;tigger transposable element-derived protein 5;pyr            | TSS5000;3'UTR;TESS000;TESS00  | 4634     | TIGD5           | tigger transposable element-derived protein 5                                  |
| GA    | cg23590660 | 2.37E-05 | 0.0059966109 | FOR0.01      | 12  | 8205602   | FOXJ2;CSAR1                             | forkhead box protein J2;C3a anaphylatoxin chemotactic receptor                         | 3'UTR;TSS5000;TESS000;TESS0   | 13353    | CSAR1           | C3a anaphylatoxin chemotactic receptor                                         |
| GA    | cg23592421 | 2.35E-05 | 0.003315348  | FOR0.01      | 14  | 105147463 | MIR4710                                 | microRNA 4710                                                                          | TSS1500                       | 3170     | MIR4710         | microRNA 4710                                                                  |
| GA    | cg23599716 | 1.28E-05 | 0.006079612  | FOR0.01      | 1   | 44686794  | DNAAP1;ER13;ER13-IT1                    | DNA methyltransferase 1-associated protein 1;ER13 exon/bisphosphate 3 isoform          | TESS000;TESS000;TESS000;3'U   | 7652     | DNAAP1          | DNA methyltransferase 1-associated protein 1                                   |
| GA    | cg23609982 | 4.22E-05 | 0.009017792  | FOR0.01      | 1   | 154377403 | IL6R-AS1;IL6R                           | interleukin 6 receptor subunit alpha precursor                                         | Body;TSS1500;TSS1500;TSS1500  | -265     | IL6R            | interleukin 6 receptor subunit alpha precursor                                 |
| GA    | cg23612220 | 2.04E-05 | 0.005667899  | FOR0.01      | 1   | 151129298 | TNFAIP8L2;TNFAIP8L2-SCNM1;LYSMD1        | tumor necrosis factor alpha-induced protein 8-like protein 2;TNFAIP8L2-SCN             | Body;Body;Body;TESS000;TESS   | 174      | TNFAIP8L2-SCNM1 | TNFAIP8L2-SCNM1 protein                                                        |
| GA    | cg23618477 | 3.02E-05 | 0.007272241  | FOR0.01      | 6   | 169334872 | LOC105378146                            | uncharacterized LOC105378146                                                           | Body                          | 29605    | LOC105378146    | uncharacterized LOC105378146                                                   |
| GA    | cg23640701 | 4.70E-06 | 0.002017305  | FOR0.01      | 12  | 52301634  | ACVR1L                                  | serine/threonine-protein kinase receptor R3 precursor                                  | Body;TSS5000                  | 347      | ACVR1L          | serine/threonine-protein kinase receptor R3 precursor                          |
| GA    | cg23648809 | 1.97E-05 | 0.005530267  | FOR0.01      | 1   | 2106400   | PRKCZ                                   | protein kinase C zeta type                                                             | Body;Body;Body;Body;Body;Bo   | 8014     | PRKCZ-AS1       | PRKCZ antisense RNA 1                                                          |
| GA    | cg23667127 | 3.15E-06 | 0.001512038  | FOR0.01      | 12  | 1739917   | WNT5B                                   | protein Wnt-5b precursor                                                               | Body;Body                     | 1521     | WNT5B           | protein Wnt-5b precursor                                                       |
| GA    | cg23668631 | 3.25E-05 | 0.007065243  | FOR0.01      | 17  | 3796936   | CAMK1C;P2RX1                            | calcium/calmodulin-dependent protein kinase kinase 1;P2X purinoceptor 1                | TSS5000;TSS1500;TSS1500;TES   | -589     | CAMK1C          | calcium/calmodulin-dependent                                                   |

Table S9. Differentially methylated CpG sites associated with GA or BW

| Trait | #cpg        | p        | fdr         | significance | chr | pos.hg19  | gene.llumina                            | gene.description                                                                | locations                     | dist2TSS | gene.nearest | gene.description                                                  |
|-------|-------------|----------|-------------|--------------|-----|-----------|-----------------------------------------|---------------------------------------------------------------------------------|-------------------------------|----------|--------------|-------------------------------------------------------------------|
| GA    | cg23915792  | 1.31E-06 | 0.000820198 | FOR0.01      | 22  | 41763255  | TEF                                     | transcription factor VBP                                                        | TSS200                        | -81      | TEF          | transcription factor VBP                                          |
| GA    | cg23934295  | 6.53E-06 | 0.002572219 | FOR0.01      | 14  | 85995655  | FLRT2                                   | leucine-rich repeat transmembrane protein FLRT2 precursor                       | TSS1500;TSS1500;TSS1500;TSS   | -713     | FLRT2        | leucine-rich repeat transmembrane protein FLRT2 precursor         |
| GA    | cg23950233  | 1.97E-05 | 0.000530267 | FOR0.01      | 6   | 33245739  | RPS18;B3GALT4;WDR46                     | 40S ribosomal protein S18;beta-1,3-galactosyltransferase 4;WD repeat-cont       | TESS000;1stExon;TESS000;TESS  | 840      | B3GALT4      | beta-1,3-galactosyltransferase 4                                  |
| GA    | cg23987137  | 5.29E-07 | 0.00041312  | FOR0.01      | 5   | 58653624  | PDE4D                                   | cAMP-specific 3',5'-cyclic phosphodiesterase 4D isoform 12                      | TSS1500;Body;Body;Body;Body   | -428     | PDE4D        | cAMP-specific 3',5'-cyclic phosphodiesterase 4D isoform 12        |
| GA    | cg24003955  | 2.54E-05 | 0.006528281 | FOR0.01      | 1   | 9912508   | CTNWBIP1                                | beta-catenin-interacting protein 1                                              | Body;Body                     | -27524   | CTNWBIP1     | calystinin-1 precursor                                            |
| GA    | cg24024651  | 5.56E-07 | 0.000434578 | FOR0.01      | 19  | 1074425   | ARHGAP45                                | rho GTPase-activating protein 45                                                | Body;Body;Body;Body;Body;Body | -2207    | ARHGAP45     | rho GTPase-activating protein 45                                  |
| GA    | cg24054871  | 4.41E-06 | 0.00192202  | FOR0.01      | 22  | 45073148  | PRRS                                    | proline-rich protein 5                                                          | Body;Body;Body;Body;Body      | 184      | PRRS         | proline-rich protein 5                                            |
| GA    | cg24060890  | 7.11E-06 | 0.002711257 | FOR0.01      | 4   | 93229269  | GRID2                                   | glutamate receptor ionotropic, delta-2 precursor                                | Body;Body                     | 3720     | GRID2        | glutamate receptor ionotropic, delta-2 precursor                  |
| GA    | cg24079727  | 3.76E-05 | 0.008435063 | FOR0.01      | 15  | 57317980  | TCF12                                   | transcription factor 12                                                         | Body;Body;Body;Body;Body;Bo   | 106338   | TCF12        | transcription factor 12                                           |
| GA    | cg24085039  | 3.76E-07 | 0.000328784 | FOR0.01      | 10  | 134211908 | PWWP28                                  | PWWP domain-containing protein 2B                                               | Body;Body                     | 1205     | PWWP28       | PWWP domain-containing protein 2B                                 |
| GA    | cg24112733  | 7.69E-06 | 0.002869609 | FOR0.01      | 7   | 38255578  | STARD3NL                                | STARD3 N-terminal-like protein                                                  | Body;Body;Body;Body;Body;Bo   | 37732    | STARD3NL     | STARD3 N-terminal-like protein                                    |
| GA    | cg24124954  | 2.74E-05 | 0.006842589 | FOR0.01      | 6   | 31508106  | ATP6V1G2-DDX39B;DDX39B;SNORD117;SNORD84 | ATP6V1G2-DDX39B readthrough (NMD candidate);spliceosome RNA helicase            | Body;1stExon;1stExon;Body;TS  | 849      | SNORD84      | small nuclear RNA, C/D box 84                                     |
| GA    | cg24129356  | 8.25E-06 | 0.003019726 | FOR0.01      | 6   | 32920735  | HLA-DMA                                 | HLA class II histocompatibility antigen, DM alpha chain precursor               | 1stExon                       | 139      | HLA-DMA      | HLA class II histocompatibility antigen, DM alpha chain precursor |
| GA    | cg24135615  | 4.30E-05 | 0.009107607 | FOR0.01      | 17  | 37042201  | LASP1                                   | LIM and SH3 domain protein 1                                                    | Body;Body;Body                | 15891    | LASP1        | LIM and SH3 domain protein 1                                      |
| GA    | cg24142464  | 7.07E-09 | 1.74E-05    | BF FOR0.01   | 1   | 40040489  | PABPC4;PABPC4-AS1                       | polyadenylation-binding protein 4;PABPC4 antisense RNA 1                        | Body;Body;Body;TESS000        | 1973     | PABPC4       | polyadenylation-binding protein 4                                 |
| GA    | cg24144853  | 3.90E-09 | 1.09E-05    | BF FOR0.01   | 3   | 194258370 |                                         |                                                                                 |                               | -46626   | TMEM44-AS1   | TMEM44 antisense RNA 1                                            |
| GA    | cg24144950  | 5.84E-08 | 7.94E-05    | BF FOR0.01   | 14  | 75867231  |                                         |                                                                                 |                               | -27195   | IDP2         | jun dimerization protein 2 isoform b                              |
| GA    | cg24160569  | 7.50E-07 | 0.000543721 | FOR0.01      | 10  | 62011445  | ANK3                                    | ankyrin-3                                                                       | Body;Body;Body;Body           | -110671  | ANK3         | ankyrin-3                                                         |
| GA    | cg24162251  | 8.43E-07 | 0.00059209  | FOR0.01      | 14  | 3240205   | UNC02313                                | long intergenic non-protein coding RNA 2313                                     | TESS000                       | 6147     | UNC02313     | long intergenic non-protein coding RNA 2313                       |
| GA    | cg24162603  | 1.37E-07 | 0.000152926 | FOR0.01      | 3   | 127945858 | EEFSEC                                  | selenocysteine-specific elongation factor                                       | Body                          | -73101   | RUVB1        | ruvB-like 1                                                       |
| GA    | cg24162801  | 4.12E-06 | 0.001846952 | FOR0.01      | 1   | 184504284 | C1orf21                                 | uncharacterized protein C1orf21                                                 | Body                          | 148122   | C1orf21      | uncharacterized protein C1orf21                                   |
| GA    | cg24165638  | 4.09E-06 | 0.001840008 | FOR0.01      | 19  | 831456    | AZU1                                    | azurocidin preproprotein                                                        | Body                          | 3620     | AZU1         | azurocidin preproprotein                                          |
| GA    | cg24166457  | 2.58E-13 | 1.19E-08    | BF FOR0.01   | 19  | 45590882  | GEMIN7;GEMIN7-AS1                       | gem-associated protein 7;GEMIN7 antisense RNA 1                                 | Body;Body;Body;Body;Body;Bo   | 2767     | GEMIN7-AS1   | GEMIN7 antisense RNA 1                                            |
| GA    | cg24167314  | 3.80E-05 | 0.008505345 | FOR0.01      | 12  | 103311500 | PAH                                     | phenylalanine hydroxylase                                                       | TSS1500;Body                  | -478     | PAH          | phenylalanine hydroxylase                                         |
| GA    | cg24173629  | 1.32E-07 | 0.000149153 | FOR0.01      | 22  | 25575559  | KIAA1671                                | uncharacterized protein KIAA1671                                                | Body                          | -20265   | CRYBB3       | beta-crystallin B3                                                |
| GA    | cg24185397  | 2.54E-05 | 0.006528281 | FOR0.01      | 17  | 25659609  |                                         |                                                                                 |                               | 38470    | WSB1         | WD repeat and SOCS box-containing protein 1                       |
| GA    | cg24185852  | 6.44E-06 | 0.002544626 | FOR0.01      | 5   | 168690818 | SLIT3;MIRS85                            | slit homolog 3 protein precursor;microRNA 585                                   | Body;Body;TSS200              | -120     | MIRS85       | microRNA 585                                                      |
| GA    | cg24193659  | 9.53E-06 | 0.003316848 | FOR0.01      | 11  | 788406    | LOC171393;CEMD1;SLC25A22                | uncharacterized LOC171393;cell cycle exit and neuronal differentiation prote    | TESS000;TESS000;Body;TESS00   | 1684     | CEMD1        | cell cycle exit and neuronal differentiation protein 1            |
| GA    | cg24202772  | 4.19E-05 | 0.008977311 | FOR0.01      | 10  | 124402857 | DMBT1                                   | deleted in malignant brain tumors 1 protein isoform b precursor                 | Body;Body;Body;Body           | -29508   | LOC12577516  | carbohydrate-binding protein AQN-1-like precursor                 |
| GA    | cg24204337  | 1.52E-07 | 2.19E-07    | BF FOR0.01   | 11  | 45721     | PTDS2                                   | phosphatidylserine synthase 2                                                   | Body;Body;Body;Body;Body      | 7009     | PTDS2        | phosphatidylserine synthase 2                                     |
| GA    | cg24250902  | 4.75E-06 | 0.001008635 | FOR0.01      | 1   | 230415547 | GALT2                                   | polypeptide N-acetylgalactosaminyltransferase 2 precursor                       | 3'UTR;3'UTR                   | 146531   | PGB05        | piggyBac transposable element-derived protein 5                   |
| GA    | cg24251439  | 3.80E-09 | 1.07E-05    | BF FOR0.01   | 19  | 1112327   | SBNO2                                   | protein strawberry notch homolog 2                                              | Body;Body                     | 7679     | GPX4         | phospholipid hydroperoxide glutathione peroxidase precursor       |
| GA    | cg24261333  | 6.93E-06 | 0.002664953 | FOR0.01      | 11  | 73357019  | PLEKH81                                 | pleckstrin homology domain-containing family B member 1                         | TSS1500;TSS1500;TSS000;TSS    | -606     | PLEKH81      | pleckstrin homology domain-containing family B member 1           |
| GA    | cg24292665  | 1.04E-05 | 0.003513867 | FOR0.01      | 11  | 69065779  | MYEOV                                   | myeloma-overexpressed gene protein isoform 1                                    | TESS000;TESS000;TESS000;TES   | 4158     | MYEOV        | myeloma-overexpressed gene protein isoform 1                      |
| GA    | cg24301247  | 1.05E-05 | 0.003538386 | FOR0.01      | 12  | 129295649 | SLC15A4                                 | solute carrier family 15 member 4                                               | Body                          | 12854    | SLC15A4      | solute carrier family 15 member 4                                 |
| GA    | cg24323958  | 4.84E-05 | 0.009850766 | FOR0.01      | 1   | 108741884 | SLC25A24                                | calcium-binding mitochondrial carrier protein ScaMC-1                           | Body                          | 1081     | SLC25A24     | calcium-binding mitochondrial carrier protein ScaMC-1             |
| GA    | cg24334983  | 6.39E-06 | 0.002530626 | FOR0.01      | 10  | 81965683  | ANXA11;UNC00857                         | annexin A11;long intergenic non-protein coding RNA 857                          | TSS1500;TSS1500;TSS1500;TSS   | -119     | ANXA11       | annexin A11                                                       |
| GA    | cg24373369  | 2.88E-08 | 4.71E-05    | BF FOR0.01   | 15  | 65320737  | MTFMT                                   | methionyl-tRNA formyltransferase, mitochondrial                                 | Body                          | 1240     | MTFMT        | methionyl-tRNA formyltransferase, mitochondrial                   |
| GA    | cg24376214  | 1.99E-05 | 0.005655589 | FOR0.01      | 19  | 38918135  | RASGRP4                                 | RAS guanyl-releasing protein 4                                                  | TSS1500;TSS1500;TSS1500;TSS   | -1190    | RASGRP4      | RAS guanyl-releasing protein 4                                    |
| GA    | cg24391122  | 3.85E-08 | 5.78E-05    | BF FOR0.01   | 19  | 7986137   | TGFB3L3;SNAPC2;CTXN1                    | transforming growth factor-beta receptor type 3-like protein;snRNA-activat      | TESS000;Body;Body;TESS000     | 238      | SNAPC2       | snRNA-activating protein complex subunit 2                        |
| GA    | cg24397007  | 4.79E-05 | 0.009788241 | FOR0.01      | 2   | 28619094  | FLJ31356;FOSL2                          | uncharacterized protein FLJ31356;fos-related antigen 2                          | TSS000;Body                   | -1595    | FLJ31356     | uncharacterized protein FLJ31356                                  |
| GA    | cg24401467  | 9.29E-09 | 9.57E-06    | BF FOR0.01   | 1   | 23041689  | GALT2                                   | polypeptide N-acetylgalactosaminyltransferase 2 precursor                       | 3'UTR;3'UTR                   | 145198   | PGB05        | piggyBac transposable element-derived protein 5                   |
| GA    | cg24401737  | 4.73E-05 | 0.009666128 | FOR0.01      | 2   | 202047472 | CASP10                                  | caspace-10                                                                      | TSS200;TSS1500;TSS1500;TSS1   | 147      | CASP10       | caspace-10                                                        |
| GA    | cg24406240  | 3.69E-05 | 0.008338881 | FOR0.01      | 11  | 88153520  |                                         |                                                                                 |                               | 82616    | CTSC         | dipeptidyl peptidase 1 precursor                                  |
| GA    | cg24407596  | 4.07E-05 | 0.00808141  | FOR0.01      | 7   | 98718683  | SMURF1                                  | E3 ubiquitin-protein ligase SMURF1                                              | Body;Body;Body                | 23048    | SMURF1       | E3 ubiquitin-protein ligase SMURF1                                |
| GA    | cg24413391  | 4.43E-05 | 0.009280449 | FOR0.01      | 2   | 27886079  | SUPT17L;SLC4A1AP                        | STAGA complex f5 subunit gamma;kanadapin                                        | Body;Body;Body;Body;Body;TS   | -258     | SLC4A1AP     | kanadapin                                                         |
| GA    | cg24420089  | 1.86E-06 | 0.001049272 | FOR0.01      | 11  | 457304    | PTDS52                                  | phosphatidylserine synthase 2                                                   | Body;Body;Body;Body;Body      | 7026     | PTDS52       | phosphatidylserine synthase 2                                     |
| GA    | cg24421410  | 4.63E-05 | 0.009566758 | FOR0.01      | 6   | 32920220  | HLA-DMA                                 | HLA class II histocompatibility antigen, DM alpha chain precursor               | Body                          | 654      | HLA-DMA      | HLA class II histocompatibility antigen, DM alpha chain precursor |
| GA    | cg24437408  | 1.29E-05 | 0.0041292   | FOR0.01      | 10  | 134661502 | CFAP46                                  | cilia- and flagella-associated protein 46                                       | Body                          | -61851   | NKG-2        | homeobox protein Nkg-2                                            |
| GA    | cg24468890  | 2.90E-05 | 0.00710775  | FOR0.01      | 1   | 32757294  | HDAC1                                   | histone deacetylase 1                                                           | TSS1500                       | -1877    | HDAC1        | histone deacetylase 1                                             |
| GA    | cg24468934  | 1.49E-06 | 0.000900327 | FOR0.01      | 1   | 26880767  | RP56KA1;MIR1976                         | ribosomal protein S6 kinase alpha-1;microRNA 1976                               | Body;Body;Body;TSS1500        | -265     | MIR1976      | microRNA 1976                                                     |
| GA    | cg24487361  | 4.30E-05 | 0.009100322 | FOR0.01      | 1   | 231473529 | EXOC8;SPRTN                             | exocyst complex component 8;sprt1-like domain-containing protein Spartan        | Body;TSS1500;TSS1500;TSS150   | 69       | EXOC8        | exocyst complex component 8                                       |
| GA    | cg24503003  | 2.94E-10 | 1.75E-06    | BF FOR0.01   | 12  | 110682837 |                                         |                                                                                 |                               | -36214   | ATP2A2       | sarcolemmal/endoplasmic reticulum calcium ATPase 2                |
| GA    | cg24504423  | 3.59E-05 | 0.008175615 | FOR0.01      | 1   | 94374268  | GLCM                                    | glutamate-cysteine ligase regulatory subunit                                    | Body;Body                     | 718      | GLCM         | glutamate-cysteine ligase regulatory subunit                      |
| GA    | cg24565747  | 4.38E-05 | 0.009214399 | FOR0.01      | 2   | 240615838 |                                         |                                                                                 |                               | -6718    | LOC150935    | uncharacterized LOC150935                                         |
| GA    | cg24577594  | 1.81E-06 | 0.001034873 | FOR0.01      | 1   | 230240631 | GALT2                                   | polypeptide N-acetylgalactosaminyltransferase 2 precursor                       | Body;Body                     | 37647    | GALT2        | polypeptide N-acetylgalactosaminyltransferase 2 precursor         |
| GA    | cg24585377  | 2.96E-09 | 8.89E-06    | BF FOR0.01   | 1   | 26857774  | RP56KA1                                 | ribosomal protein S6 kinase alpha-1                                             | Body                          | 1523     | RP56KA1      | ribosomal protein S6 kinase alpha-1                               |
| GA    | cg245949459 | 1.23E-07 | 0.000140828 | FOR0.01      | 2   | 27478146  | SLC30A3                                 | zinc transporter 3                                                              | 3'UTR;3'UTR;3'UTR;3'UTR       | 7769     | SLC30A3      | zinc transporter 3                                                |
| GA    | cg24601030  | 2.50E-05 | 0.006452624 | FOR0.01      | 11  | 111847747 | DIXDC1                                  | dixin isoform b                                                                 | TESS000;Body;TSS1500          | -285     | DIXDC1       | dixin isoform b                                                   |
| GA    | cg24605046  | 2.74E-08 | 4.52E-05    | BF FOR0.01   | 6   | 33245895  | RPS18;B3GALT4;WDR46                     | 40S ribosomal protein S18;beta-1,3-galactosyltransferase 4;WD repeat-conta      | TESS000;1stExon;TESS000;TESS  | 996      | B3GALT4      | beta-1,3-galactosyltransferase 4                                  |
| GA    | cg24618514  | 8.93E-06 | 0.003165753 | FOR0.01      | 3   | 194868507 | XXYLT1;XXYLT1-AS2                       | xyloside xylosyltransferase 1;XXYLT1 antisense RNA 2                            | Body;Body;TSS200;TSS200       | -92      | XXYLT1-AS2   | XXYLT1 antisense RNA 2                                            |
| GA    | cg24647428  | 1.95E-05 | 0.005033156 | FOR0.01      | 3   | 100789257 |                                         |                                                                                 |                               | -76923   | ABIB8P       | target of Nesh-SH3 isoform 2 precursor                            |
| GA    | cg24660675  | 7.37E-07 | 0.000530666 | FOR0.01      | 10  | 135168850 | PRAP1;FUOM                              | proline-rich acidic protein 1 isoform 2 precursor;fucose mutarotase             | TESS000;TESS000;3'UTR;3'UTR   | 2673     | FUOM         | fucose mutarotase                                                 |
| GA    | cg24699699  | 2.20E-05 | 0.005949657 | FOR0.01      | 1   | 93258316  | EVIS                                    | ecotropic viral integration site 5 protein homolog isoform 1                    | TSS1500;TSS1500               | -349     | EVIS         | ecotropic viral integration site 5 protein homolog isoform 1      |
| GA    | cg24702487  | 2.64E-12 | 5.91E-08    | BF FOR0.01   | 19  | 13951481  | LOC284454;MIR24-2;MIR274;MIR23A         | microRNA 24-2;microRNA 274;microRNA 23a                                         | Body;Body;Body                | 2251     | LOC284454    | small integral membrane protein 18                                |
| GA    | cg24705939  | 1.95E-05 | 0.005031356 | FOR0.01      | 8   | 3041386   | BBP45                                   | RNA-binding protein with multiple signaling                                     | Body;Body;Body                | -82232   | SHM118       | protein lyl-1                                                     |
| GA    | cg24706505  | 9.33E-06 | 0.003269095 | FOR0.01      | 19  | 13211261  | NFK1L1;L1;TRMT1                         | nuclear factor 1-kappa-type protein lyl-1;RNA (guanine(26)-N(2))-dimethyltransf | TESS000;TESS000;TESS000;TES   | 2411     | L1L1         | protein lyl-1                                                     |
| GA    | cg24731322  | 4.17E-05 | 0.008952664 | FOR0.01      | 11  | 46389164  | DGKZ                                    | diacylglycerol kinase zeta                                                      | Body;Body;Body;Body;Body;Bo   | 6009     | DGKZ         | diacylglycerol kinase zeta                                        |
| GA    | cg24716343  | 2.84E-06 | 0.001408963 | FOR0.01      | 1   | 233431953 | PCNX2                                   | pecanex-like protein 2 isoform 2                                                | TSS1500;TSS1500               | -482     | PCNX2        | pecanex-like protein 2 isoform 2                                  |
| GA    | cg24717799  | 2.61E-06 | 0.001319172 | FOR0.01      | 15  | 83680832  | C15orf40;BTBD1                          | UPF0235 protein C15orf40 isoform c;BTB/POZ domain-containing protein 1          | TSS1500;TSS1500;TSS1500;TSS   | -441     | C15orf40     | UPF0235 protein C15orf40 isoform c                                |
| GA    | cg24718197  | 9.94E-10 | 4.11E-06    | BF FOR0.01   | 17  | 79485709  |                                         |                                                                                 |                               | -5884    | ACTG1        | actin, cytoplasmic 2                                              |
| GA    | cg24729928  | 7.28E-07 | 0.000532021 | FOR0.01      | 12  | 31480184  | SIN3CAF;FLJ13224                        | SIN3-HDAC complex-associated factor;uncharacterized LOC79857                    | TSS1500;TSS1500;TSS1500;TES   | -1063    | SIN3CAF      | SIN3-HDAC complex-associated factor                               |
| GA    | cg24737324  | 4.79E-05 | 0.009790278 | FOR0.01      | 20  | 19867143  | RIN2                                    | ras and Rab interactor 2                                                        | TSS200;TSS000                 | -21      | RIN2         | ras and Rab interactor 2                                          |
| GA    | cg24741873  | 7.09E-07 | 0.000521103 | FOR0.01      | 10  | 82223998  | TSPAN14                                 | tetraspanin-14                                                                  | Body;Body;Body;Body;Body;Bo   | -4020    | TSPAN14      | tetraspanin-14                                                    |
| GA    | cg24756378  | 9.93E-06 | 0.003412101 | FOR0.01      | 14  | 33401638  |                                         |                                                                                 |                               | -6446    | NPAS3        | neuronal PAS domain-containing protein 3 isoform 3                |
| GA    | cg24760467  | 6.69E-06 | 0.002608642 | FOR0.01      | 10  | 102760784 | L2T52                                   | leucine zipper putative tumor suppressor 2                                      | Body;Body;Body;TSS1500        | 1220     | L2T52        | leucine zipper putative tumor suppressor 2                        |
| GA    | cg24761525  | 3.89E-05 | 0.008614143 | FOR0.01      | 7   | 46651745  | H0XB3;H0XB4                             | homeobox protein Hox-B3;homeobox protein Hox-B4                                 | 5'UTR;Body;Body;TESS000       | 65       | H0XB3        | homeobox protein Hox-B3                                           |
| GA    | cg24764793  | 1.69E-06 | 0.000984798 | FOR0.01      | 6   | 152126745 | ESR1                                    | estrogen receptor                                                               | Body;TSS200                   |          |              |                                                                   |

Table S9. Differentially methylated CpG sites associated with GA or BW

| Trait | #cpg       | p          | fdr         | significance | chr | pos.hg19  | gene.llumina                       | gene.description                                                             | locations                    | dist2TSS | gene.nearest | gene.description                                                   |
|-------|------------|------------|-------------|--------------|-----|-----------|------------------------------------|------------------------------------------------------------------------------|------------------------------|----------|--------------|--------------------------------------------------------------------|
| GA    | cg24924577 | 1.87E-05   | 0.005356826 | FR0.01       | 15  | 90735148  | SEMA4B                             | semaphorin-4B isoform 1 precursor                                            | Body;Body;Body;TSS200        | -4       | SEMA4B       | semaphorin-4B isoform 1 precursor                                  |
| GA    | cg24951886 | 2.39E-12   | 5.86E-08    | BF FR0.01    | 10  | 13526236  | BEND7                              | BEN domain-containing protein 7                                              | Body;Body;Body;Body          | 18740    | BEND7        | BEN domain-containing protein 7                                    |
| GA    | cg24956866 | 5.07E-06   | 0.002128915 | FR0.01       | 7   | 134464129 | CALD1                              | caldesmon                                                                    | TSS1500;TSS1500;TSS1500      | -255     | CALD1        | caldesmon                                                          |
| GA    | cg25009965 | 2.49E-12   | 5.86E-08    | BF FR0.01    | 11  | 114031120 | ZBTB16                             | zinc finger and BTB domain-containing protein 16                             | Body;Body;Body;Body;Body     | 97188    | ZBTB16       | zinc finger and BTB domain-containing protein 16                   |
| GA    | cg25027788 | 1.66E-06   | 0.000974744 | FR0.01       | 12  | 5167002   | VWF                                | von Willebrand factor precursor                                              | Body                         | -17653   | SNORA120     | small nuclear RNA, H/ACA box 120                                   |
| GA    | cg25030888 | 2.63E-05   | 0.00674668  | FR0.01       | 1   | 67156909  | SGP1                               | SG3-containing GNB2-like protein 3-interacting protein 1                     | Body;Body;Body;Body          | -61232   | TCTE1D1      | tctex1 domain-containing protein 1                                 |
| GA    | cg25045219 | 2.76E-09   | 1.83E-05    | BF FR0.01    | 17  | 263096    | LOC105371430;C17orf97              | uncharacterized LOC105371430;protein LIAT1                                   | Body;Body                    | 718      | LOC105371430 | uncharacterized LOC105371430                                       |
| GA    | cg25053142 | 4.92E-05   | 0.009952864 | FR0.01       | 10  | 775353    |                                    |                                                                              |                              | -39745   | DIP2C        | disco-interacting protein 2 homolog C                              |
| GA    | cg25061349 | 7.74E-07   | 0.000557305 | FR0.01       | 6   | 43337791  | ZNF318                             | zinc finger protein 318                                                      | TSS1500                      | -406     | ZNF318       | zinc finger protein 318                                            |
| GA    | cg25072666 | 2.41E-07   | 0.000232951 | FR0.01       | 17  | 79533843  | NPLOC4                             | nuclear protein localization protein 4 homolog                               | Body;Body;Body;TSS1500       | -215     | NPLOC4       | nuclear protein localization protein 4 homolog                     |
| GA    | cg25095518 | 3.14E-05   | 0.00742844  | FR0.01       | 2   | 98329337  | ZAP70                              | tyrosine-protein kinase ZAP-70                                               | TSS1500                      | -693     | ZAP70        | tyrosine-protein kinase ZAP-70                                     |
| GA    | cg25096368 | 9.03E-08   | 0.000113076 | BF FR0.01    | 12  | 54150616  | CISTR                              | chondrogenesis-associated transcript                                         | TSS5000;Body                 | 202      | CISTR        | chondrogenesis-associated transcript                               |
| GA    | cg25097610 | 4.37E-06   | 0.0091161   | FR0.01       | 4   | 4763360   | LOC101928279                       | uncharacterized LOC101928279                                                 | TSS200                       | -126     | LOC101928279 | uncharacterized LOC101928279                                       |
| GA    | cg25117875 | 4.94E-05   | 0.009970378 | FR0.01       | 12  | 14413581  |                                    |                                                                              |                              | -104984  | ATF7IP       | activating transcription factor 7-interacting protein 1            |
| GA    | cg25124966 | 3.26E-06   | 0.00150582  | FR0.01       | 11  | 129723987 | TMEM45B                            | transmembrane protein 45B                                                    | Body;Body;Body;Body          | 38245    | TMEM45B      | transmembrane protein 45B                                          |
| GA    | cg25144135 | 1.90E-06   | 0.001066227 | FR0.01       | 1   | 1144012   | TNFRSF18;TNFRSF4                   | tumor necrosis factor receptor superfamily member 18 precursor;tumor nec     | TSS5000;TSS5000;TSS5000;TES  | -2040    | TNFRSF18     | tumor necrosis factor receptor superfamily member 18 precursor     |
| GA    | cg25145687 | 1.80E-05   | 0.005244066 | FR0.01       | 11  | 1606664   | KRTAP5-AS1;KRTAP5-1                | KRTAP5-1/KRTAP5-2 antisense RNA 1;keratin-associated protein 5-1             | Body;TSS200                  | -151     | KRTAP5-1     | keratin-associated protein 5-1                                     |
| GA    | cg25150953 | 1.38E-05   | 0.004338856 | FR0.01       | 4   | 41540229  | UMCH1                              | LIM and calponin homology domains-containing protein 1 isoform j             | Body;Body;Body;Body;Body;Bo  | 56       | UMCH1        | LIM and calponin homology domains-containing protein 1 isoform j   |
| GA    | cg25162533 | 5.82E-06   | 0.002361871 | FR0.01       | 17  | 81032067  |                                    |                                                                              |                              | -5417    | METRNL       | metorin-like protein precursor                                     |
| GA    | cg25165932 | 1.19E-05   | 0.003911308 | FR0.01       | 12  | 109025846 | SELPGL;MIR4496                     | P-selectin glycoprotein ligand 1 precursor;microRNA 4496                     | 5'UTR;Body;TSS5000           | 11       | SELPGL       | P-selectin glycoprotein ligand 1 precursor                         |
| GA    | cg25174412 | 4.15E-10   | 2.21E-06    | BF FR0.01    | 12  | 105803653 |                                    |                                                                              |                              | 79185    | C12orf75     | overexpressed in colon carcinoma 1 protein                         |
| GA    | cg25202280 | 2.12E-06   | 0.00114844  | FR0.01       | 17  | 795210896 | FAAP100;NPLOC4                     | Fanconi anemia core complex-associated protein 100;nuclear protein localiz   | TSS5000;TSS5000;TES5000;TES  | -1710    | FAAP100      | Fanconi anemia core complex-associated protein 100                 |
| GA    | cg25207952 | 1.65E-05   | 0.004914142 | FR0.01       | 15  | 75499552  | C15orf39                           | uncharacterized protein C15orf39                                             | 1stExon                      | 5730     | C15orf39     | uncharacterized protein C15orf39                                   |
| GA    | cg25211403 | 1.12E-05   | 0.003715467 | FR0.01       | 21  | 46975897  | SLC19A1                            | reduced folate transporter                                                   | Body                         | 7042     | SLC19A1      | reduced folate transporter                                         |
| GA    | cg25236791 | 4.92E-05   | 0.009954702 | FR0.01       | 3   | 52302252  | WDR82;MIRLET7G                     | WD repeat-containing protein 82;microRNA let-7g                              | Body;TSS5000                 | 125      | MIRLET7G     | microRNA let-7g                                                    |
| GA    | cg25247351 | 2.02E-06   | 0.001107518 | FR0.01       | 6   | 32908794  | HLA-DMB                            | HLA class II histocompatibility antigen, DM beta chain precursor             | 5'UTR                        | 11       | HLA-DMB      | HLA class II histocompatibility antigen, DM beta chain precursor   |
| GA    | cg25254074 | 1.04E-07   | 0.000127281 | BF FR0.01    | 6   | 41607326  | MDFI                               | myoD family inhibitor                                                        | Body;Body;Body;Body          | 1121     | MDFI         | myoD family inhibitor                                              |
| GA    | cg25254470 | 2.90E-07   | 0.00026785  | FR0.01       | 6   | 36954695  | MTCH1                              | mitochondrial carrier homolog 1 isoform 1                                    | TSS1500;TSS1500;TSS1500      | -368     | MTCH1        | mitochondrial carrier homolog 1 isoform 1                          |
| GA    | cg25266281 | 5.99E-06   | 0.00241807  | FR0.01       | 2   | 242904768 | LINC01237                          | long intergenic non-protein coding RNA 1237                                  | Body                         | -8065    | LINC01238    | long intergenic non-protein coding RNA 1238                        |
| GA    | cg25303150 | 1.33E-06   | 0.000824423 | FR0.01       | 10  | 134211874 | PWWP2B                             | PWWP domain-containing protein 2B                                            | Body;Body                    | 1171     | PWWP2B       | PWWP domain-containing protein 2B                                  |
| GA    | cg25325512 | 3.76E-05   | 0.008433829 | FR0.01       | 6   | 37142220  | PIM1                               | serine/threonine-protein kinase pim-1                                        | 3'UTR;3'UTR                  | 4293     | PIM1         | serine/threonine-protein kinase pim-1                              |
| GA    | cg25363679 | 3.04E-05   | 0.007290638 | FR0.01       | 12  | 71031202  | PTPRB;PTPR                         | receptor-type tyrosine-protein phosphatase beta;receptor-type tyrosine-pro   | 5'UTR;5'UTR;TSS5000;TSS5000  | 7        | PTPRB        | receptor-type tyrosine-protein phosphatase beta                    |
| GA    | cg25370658 | 2.32E-06   | 0.001232955 | FR0.01       | 6   | 7673306   |                                    |                                                                              |                              | -53025   | BMP6         | bone morphogenetic protein 6 precursor                             |
| GA    | cg25426302 | 1.86E-05   | 0.005345008 | FR0.01       | 6   | 32120826  | PRR11;LOC100507547;PPT2;PPT2-EGFL8 | proline-rich transmembrane protein 1;uncharacterized LOC100507547;lyso       | 5'UTR;TSS1500;Body;Body;Bod  | 34       | PRR11        | proline-rich transmembrane protein 1                               |
| GA    | cg25433552 | 1.15E-05   | 0.003800698 | FR0.01       | 5   | 159560548 |                                    |                                                                              |                              | -14091   | PWWP2A       | PWWP domain-containing protein 2A isoform f                        |
| GA    | cg25456477 | 1.82E-07   | 0.000188165 | FR0.01       | 12  | 86230367  | RASSF9                             | ras association domain-containing protein 9                                  | TSS200                       | -180     | RASSF9       | ras association domain-containing protein 9                        |
| GA    | cg25461186 | 8.20E-09   | 1.88E-05    | BF FR0.01    | 12  | 122518089 | MLXIP                              | MLX-interacting protein isoform 2                                            | Body                         | 1428     | MLXIP        | MLX-interacting protein isoform 2                                  |
| GA    | cg25461290 | 4.02E-05   | 0.008750459 | FR0.01       | 8   | 142276422 |                                    |                                                                              |                              | -11694   | SLC45A4      | solute carrier family 45 member 4 isoform 3                        |
| GA    | cg25472804 | 2.22E-07   | 0.000218344 | FR0.01       | 8   | 128219418 | CCAT1                              | colon cancer associated transcript 1                                         | TSS5000                      | -9546    | CASC19       | cancer susceptibility 19                                           |
| GA    | cg25484139 | 1.82E-05   | 0.00526589  | FR0.01       | 3   | 13008273  | IQSEC1                             | IQ motif and SEC7 domain-containing protein 1                                | Body;Body;Body               | 957      | IQSEC1       | IQ motif and SEC7 domain-containing protein 1                      |
| GA    | cg25486834 | 2.31E-05   | 0.00612608  | FR0.01       | 11  | 13983792  | SPON1                              | spandin-1 precursor                                                          | TSS1500                      | -478     | SPON1        | spandin-1 precursor                                                |
| GA    | cg25494227 | 4.73E-07   | 0.000386799 | FR0.01       | 12  | 10321614  | TMEM52B                            | transmembrane protein 52B                                                    | Body;TSS200                  | -16      | TMEM52B      | transmembrane protein 52B                                          |
| GA    | cg25509184 | 2.73E-06   | 0.001362799 | FR0.01       | 7   | 117119382 | CFTR                               | cystic fibrosis transmembrane conductance regulator                          | TSS1500                      | -696     | CFTR         | cystic fibrosis transmembrane conductance regulator                |
| GA    | cg25552317 | 3.09E-05   | 0.007364993 | FR0.01       | 12  | 92379065  | LINC01619                          | long intergenic non-protein coding RNA 1619                                  | Body;Body;Body;Body;Body     | 156424   | LINC01619    | long intergenic non-protein coding RNA 1619                        |
| GA    | cg25592206 | 8.36E-07   | 0.000589047 | FR0.01       | 1   | 51439348  | CDKN2C                             | cyclin-dependent kinase 4 inhibitor C                                        | Body;Body                    | 3432     | CDKN2C       | cyclin-dependent kinase 4 inhibitor C                              |
| GA    | cg25599242 | 2.75E-09   | 8.53E-06    | BF FR0.01    | 11  | 63304337  | PLAAT4                             | phospholipase A and acyltransferase 4                                        | 5'UTR                        | -18      | PLAAT4       | phospholipase A and acyltransferase 4                              |
| GA    | cg25611723 | 8.36E-08   | 0.000106023 | BF FR0.01    | 18  | 10453624  | APCDD1                             | protein APCDD1 precursor                                                     | TSS1500                      | -1007    | APCDD1       | protein APCDD1 precursor                                           |
| GA    | cg25630910 | 2.48E-06   | 0.001281311 | FR0.01       | 12  | 123753186 | CDK2AP1                            | cyclin-dependent kinase 2-associated protein 1                               | TSS1500;Body;Body;Body;Body  | -385     | CDK2AP1      | cyclin-dependent kinase 2-associated protein 1                     |
| GA    | cg25636159 | 2.67E-07   | 0.000251907 | FR0.01       | 22  | 40743859  | ADSL                               | adenylosuccinate lyase                                                       | Body;Body;Body;Body;Body     | 1356     | ADSL         | adenylosuccinate lyase                                             |
| GA    | cg25663304 | 3.59E-05   | 0.008185792 | FR0.01       | 5   | 176172918 | LINC01574                          | long intergenic non-protein coding RNA 1574                                  | TSS5000                      | 2713     | LINC01574    | long intergenic non-protein coding RNA 1574                        |
| GA    | cg25671716 | 1.51E-05   | 0.004635914 | FR0.01       | 12  | 96441714  | LTAAH                              | leukotriene A-4 hydrolase                                                    | TSS5000;TSS5000              | -4416    | LTAAH        | leukotriene A-4 hydrolase                                          |
| GA    | cg25673591 | 3.66E-05   | 0.008278866 | FR0.01       | 17  | 39945814  | JUP                                | junction plakoglobin                                                         | TSS5000;TSS5000;TSS5000;TSS  | -2794    | JUP          | junction plakoglobin                                               |
| GA    | cg25673593 | 1.92E-05   | 0.004525597 | FR0.01       | 17  | 37778125  |                                    |                                                                              |                              | -5407    | PPP1R18      | protein phosphatase 1 regulatory subunit 18                        |
| GA    | cg25715705 | 3.83E-05   | 0.007138082 | FR0.01       | 7   | 130020096 | CPA1                               | carbamoyl phosphate synthase (glutamine-hydrolyzing) CPA1                    | TSS1500                      | -238     | CPA1         | carbamoyl phosphate synthase (glutamine-hydrolyzing) CPA1          |
| GA    | cg25790853 | 2.05E-06   | 0.001119665 | FR0.01       | 22  | 39541983  | CBX7                               | chromobox protein homolog 7                                                  | Body;Body;Body               | 6702     | CBX7         | chromobox protein homolog 7                                        |
| GA    | cg25823926 | 1.45E-06   | 0.000880223 | FR0.01       | 12  | 94153360  | CRADD                              | death domain-containing protein CRADD                                        | Body;Body;Body;Body          | -21761   | LOC101928731 | uncharacterized LOC101928731                                       |
| GA    | cg25827710 | 5.03E-06   | 0.002118166 | FR0.01       | 13  | 46742802  | LCP1                               | plastin-2                                                                    | Body                         | 13510    | LCP1         | plastin-2                                                          |
| GA    | cg25838150 | 2.37E-05   | 0.006217736 | FR0.01       | 11  | 77259596  |                                    |                                                                              |                              | -22537   | LOC646029    | uncharacterized LOC646029                                          |
| GA    | cg25898146 | 1.45E-06   | 0.000879909 | FR0.01       | 8   | 1992746   | MYOM2                              | M-protein, striated muscle                                                   | TSS1500                      | -414     | MYOM2        | M-protein, striated muscle                                         |
| GA    | cg25903143 | 3.26E-07   | 0.000295783 | FR0.01       | 11  | 68920466  | LOC338694;SMIM38                   | uncharacterized LOC338694;small integral membrane protein 38                 | Body;TSS5000;TSS5000         | -2936    | SMIM38       | small integral membrane protein 38                                 |
| GA    | cg25913882 | 2.28E-05   | 0.006078006 | FR0.01       | 10  | 17067842  | CUBN                               | cubilin precursor                                                            | Body                         | 103968   | CUBN         | cubilin precursor                                                  |
| GA    | cg25915539 | 2.81E-07   | 0.000261963 | FR0.01       | 4   | 114214080 | ANK2                               | ankyrin-2 isoform 38                                                         | Body;Body;Body;Body;Body;Bo  | 86       | ANK2         | ankyrin-2 isoform 38                                               |
| GA    | cg25934954 | 2.06E-08   | 3.50E-05    | BF FR0.01    | 11  | 64567121  | MAP4K2;MEN1                        | mitogen-activated protein kinase kinase kinase kinase 2;menin                | Body;Body;TSS5000;TSS5000;T  | 3565     | MAP4K2       | mitogen-activated protein kinase kinase kinase kinase 2            |
| GA    | cg25936876 | 2.82E-05   | 0.006964458 | FR0.01       | 8   | 6484687   | MCPH1;MCPH1-AS1;MIR8055            | microcephalin;MCPH1 antisense RNA 1;microRNA 8055                            | Body;Body;Body;Body;Body;TS  | -4946    | MIR8055      | microRNA 8055                                                      |
| GA    | cg25944047 | 1.49E-05   | 0.004585527 | FR0.01       | 5   | 141391533 | GNPDA1                             | glucosamine-6-phosphate isomerase 1                                          | 1stExon                      | 1059     | GNPDA1       | glucosamine-6-phosphate isomerase 1                                |
| GA    | cg25960802 | 4.33E-06   | 0.001899024 | FR0.01       | 19  | 116018    | SBNO2                              | protein strawberry notch homolog 2                                           | Body                         | -1464    | SBNO2        | protein strawberry notch homolog 2                                 |
| GA    | cg25983531 | 3.80E-05   | 0.008501655 | FR0.01       | 7   | 36765142  | AOAH                               | acyloxyacyl hydrolase precursor                                              | TSS1500;TSS1500;TSS1500      | -988     | AOAH         | acyloxyacyl hydrolase precursor                                    |
| GA    | cg26005232 | 1.08E-05   | 0.003613193 | FR0.01       | 1   | 27247829  | NUDC                               | nuclear migration protein nudC                                               | TSS1500                      | -404     | NUDC         | nuclear migration protein nudC                                     |
| GA    | cg26027170 | 1.40E-07   | 0.000155104 | FR0.01       | 17  | 37394705  | LOC101929578                       | transcription factor CP2-like                                                | Body                         | 683      | LOC101929578 | transcription factor CP2-like                                      |
| GA    | cg26077811 | 2.25E-06   | 0.001210464 | FR0.01       | 11  | 119232263 | USP2                               | ubiquitin carboxyl-terminal hydrolase 2                                      | Body;Body;Body               | 2655     | USP2         | ubiquitin carboxyl-terminal hydrolase 2                            |
| GA    | cg26133399 | 7.02E-07   | 0.000518986 | FR0.01       | 12  | 62583974  | TAF42                              | chemokine-like protein TAF4-2 precursor                                      | Body                         | 2646     | TAF42        | chemokine-like protein TAF4-2 precursor                            |
| GA    | cg26152923 | 2.27E-06   | 0.001217899 | FR0.01       | 19  | 18284120  | PIK3R2;IFI30                       | phosphatidylinositol 3-kinase regulatory subunit beta;gamma-interferon-ind   | TSS5000;TSS5000;TES5000;TSS  | -502     | IFI30        | gamma-interferon-inducible lysosomal thiol reductase preproprotein |
| GA    | cg26160218 | 1.88E-05   | 0.005358367 | FR0.01       | 3   | 24538388  | THR8;THR8-AS1                      | thyroid hormone receptor beta;THR8 antisense RNA 1                           | TSS5000;TSS5000;TSS5000;TSS  | -1189    | THR8         | thyroid hormone receptor beta                                      |
| GA    | cg26161820 | 4.16E-06   | 0.001859025 | FR0.01       | 17  | 37792777  | PPP1R18;STARD3                     | protein phosphatase 1 regulatory subunit 18;star-related lipid transfer prot | 3'UTR;3'UTR;3'UTR;TSS1500;TS | -555     | STARD3       | star-related lipid transfer protein 3                              |
| GA    | cg26189283 | 6.65E-08   | 8.77E-05    | BF FR0.01    | 1   | 155109378 | EFNA1;SLC50A1;DPM3                 | ephrin-A1 isoform b precursor;sugar transporter SWEET1;dolichol-phosphat     | TSS5000;TSS5000;Body;Body;B  | 1051     | SLC50A1      | sugar transporter SWEET1                                           |
| GA    | cg26191447 | 5.67E-07   | 0.000439896 | FR0.01       | 2   | 19165418  |                                    |                                                                              |                              | -89128   | GLIS         | glutaminease kidney isoform, mitochondrial                         |
| GA    | cg26201213 | 6.03E-06   | 0.002426612 | FR0.01       | 10  | 131265796 | MGMT                               | methylated-DNA-protein-cysteine methyltransferase                            | Body                         | 292      | MGMT         | methylated-DNA-protein-cysteine methyltransferase                  |
| GA    | cg26206400 | 1.04E-06   | 0.003510259 | FR0.01       | 11  | 12615257  | TRAP1;TRAP                         | FAD-dependent oxidoreductase domain-containing protein 1;tol/interleukin     | TSS5000;TES5000;TSS5000;TSS  | 624      | TRAP         | tol/interleukin-1 receptor domain-containing adapter protein       |
| GA    | cg26207995 | 4.71E-05   | 0.009666218 | FR0.01       | 17  | 58045920  | RNF11;TBC1D3P1;DHX40P1;RNF11-OT    | E3 ubiquitin-protein ligase RNF11;TBC1D3P1-DHX40P1 readthrough; transcr      | TSS5000;Body;Body;Body       | 3464     | RNF11-OT     | RNF11 divergent transcript                                         |
| GA    | cg26215727 | 4.44E-05</ |             |              |     |           |                                    |                                                                              |                              |          |              |                                                                    |

| Trait | #cpg       | p        | fdr         | significance | chr | pos.hg19  | gene.llumina                   | gene.description                                                            | locations                     | dist2TSS | gene.nearest | gene.description                                                                              |
|-------|------------|----------|-------------|--------------|-----|-----------|--------------------------------|-----------------------------------------------------------------------------|-------------------------------|----------|--------------|-----------------------------------------------------------------------------------------------|
| GA    | cg26445608 | 3.36E-05 | 0.007778344 | FDR0.01      | 20  | 2780114   | CPXM1                          | probable carboxypeptidase X1 precursor                                      | Body;Body                     | 1159     | CPXM1        | probable carboxypeptidase X1 precursor                                                        |
| GA    | cg26451188 | 2.21E-05 | 0.005949657 | FDR0.01      | 17  | 8295971   | RNF222                         | RING finger protein 222                                                     | 3'UTR                         | 5174     | RNF222       | RING finger protein 222                                                                       |
| GA    | cg26463621 | 2.62E-09 | 8.28E-06    | BF FDR0.01   | 18  | 13219222  | LDLRAD4                        | low-density lipoprotein receptor class A domain-containing protein 4        | Body                          | 464      | LDLRAD4      | low-density lipoprotein receptor class A domain-containing protein 4                          |
| GA    | cg26467528 | 3.95E-05 | 0.00869363  | FDR0.01      | 6   | 31632248  | CGOR47;GPANK1;CSNK2B           | uncharacterized protein CGOR47;G patch domain and ankyrin repeat-contain    | TSS5000;1stExon;1stExon;1stEx | 526      | GPANK1       | G patch domain and ankyrin repeat-containing protein 1                                        |
| GA    | cg26472802 | 2.69E-05 | 0.00616213  | FDR0.01      | 21  | 45713719  | NR1C                           | autoimmune regulator                                                        | Body                          | 6216     | NR1C         | ATP-dependent 6-phosphofructokinase, liver type                                               |
| GA    | cg26472910 | 5.02E-11 | 4.88E-07    | BF FDR0.01   | 13  | 28673762  | FLT3                           | receptor-type tyrosine-protein kinase FLT3 precursor                        | Body;Body                     | 951      | FLT3         | receptor-type tyrosine-protein kinase FLT3 precursor                                          |
| GA    | cg26482939 | 4.26E-05 | 0.009067438 | FDR0.01      | 19  | 3136710   | GNA15;LOC100996351             | guanine nucleotide-binding protein subunit alpha-15;                        | Body;TSS5000                  | 680      | GNA15        | guanine nucleotide-binding protein subunit alpha-15                                           |
| GA    | cg26500033 | 3.39E-05 | 0.007807701 | FDR0.01      | 6   | 166585954 | TBX1                           | T-box transcription factor T                                                | TSS5000;TSS5000;TSS5000;TSS   | -3797    | TBX1         | T-box transcription factor T                                                                  |
| GA    | cg26518660 | 7.67E-06 | 0.002863133 | FDR0.01      | 1   | 79728608  |                                |                                                                             |                               | -256193  | ADGR4        | adhesion G protein-coupled receptor L4 precursor                                              |
| GA    | cg26532627 | 4.86E-05 | 0.009806671 | FDR0.01      | 17  | 43397444  | MAP3K14-AS1;SPATA32;MAP3K14    | MAP3K14 antisense RNA 1; spermatogenesis-associated protein 32; mitogen-    | Body;Body;Body;TSS1500;Body   | -283     | SPATA32      | spermatogenesis-associated protein 32                                                         |
| GA    | cg26542567 | 1.89E-08 | 3.29E-05    | BF FDR0.01   | 8   | 142986670 |                                |                                                                             |                               | -118996  | MIR1302-7    | microRNA 1302-7                                                                               |
| GA    | cg26596719 | 4.58E-09 | 1.25E-05    | BF FDR0.01   | 7   | 142986429 | LOC105375545;TMEM139;CASP2     | transmembrane protein 139; caspase-2                                        | TSS5000;TSS5000;TSS5000;TES   | -251     | CASP2        | caspase-2                                                                                     |
| GA    | cg26606789 | 1.11E-05 | 0.003697543 | FDR0.01      | 21  | 44253219  |                                |                                                                             |                               | 46166    | WDR4         | tRNA (guanine-N(7))-methyltransferase non-catalytic subunit WDR4 isoform 2                    |
| GA    | cg26615176 | 4.37E-11 | 4.44E-07    | BF FDR0.01   | 11  | 65150416  | SLC25A45;FRMD8                 | solute carrier family 25 member 45; FERM domain-containing protein 8        | TSS1500;TSS1500;TSS1500;TSS   | -273     | SLC25A45     | solute carrier family 25 member 45                                                            |
| GA    | cg26619671 | 4.53E-09 | 1.24E-05    | BF FDR0.01   | 16  | 89638625  | CPNE7                          | copine-7                                                                    | TSS5000;TSS5000               | -3540    | CPNE7        | copine-7                                                                                      |
| GA    | cg26647303 | 4.46E-05 | 0.009318364 | FDR0.01      | 19  | 2041955   | MAPK2                          | MAP kinase-interacting serine/threonine-protein kinase 2                    | Body;Body                     | 9288     | MAPK2        | MAP kinase-interacting serine/threonine-protein kinase 2                                      |
| GA    | cg26682407 | 1.24E-05 | 0.004023256 | FDR0.01      | 13  | 113660246 | MCF2L                          | guanine nucleotide exchange factor DBS                                      | Body;Body;Body;Body;Body;Bo   | 4219     | MCF2L        | guanine nucleotide exchange factor DBS                                                        |
| GA    | cg26700215 | 4.06E-06 | 0.001832219 | FDR0.01      | 8   | 67070006  | TRIM55                         | tripartite motif-containing protein 55                                      | Body;Body;Body;Body           | 20693    | CRH          | corticotropin precursor                                                                       |
| GA    | cg26706803 | 2.66E-13 | 1.19E-08    | BF FDR0.01   | 16  | 50293530  |                                |                                                                             |                               | -6931    | ADCY7        | adenylyl cyclase type 7                                                                       |
| GA    | cg26723847 | 8.23E-06 | 0.003015743 | FDR0.01      | 11  | 134095652 | NCAPD3;VP526B                  | condensin-2 complex subunit D3; vacuolar protein sorting-associated protein | TSS5000;TSS5000;TSS5000;TSS   | -297     | NCAPD3       | condensin-2 complex subunit D3                                                                |
| GA    | cg26749414 | 1.98E-06 | 0.001088412 | FDR0.01      | 19  | 46807272  | HIF3A                          | hypoxia-inducible factor 3-alpha                                            | Body;1stExon;1stExon;Body     | 397      | HIF3A        | hypoxia-inducible factor 3-alpha                                                              |
| GA    | cg26796095 | 2.16E-09 | 7.31E-06    | BF FDR0.01   | 19  | 5625046   | SAFB2;SAFB                     | scaffold attachment factor B2; scaffold attachment factor B1                | TSS5000;Body;Body;Body;Body   | 1953     | SAFB         | scaffold attachment factor B1                                                                 |
| GA    | cg26796518 | 7.11E-06 | 0.002711257 | FDR0.01      | 12  | 6184516   | VWF                            | von Willebrand factor precursor                                             |                               | -35167   | SNORA120     | small nucleolar RNA, H/ACA box 120                                                            |
| GA    | cg26799474 | 1.09E-09 | 4.42E-06    | BF FDR0.01   | 2   | 202098951 | CASP10;CASP8                   | caspase-10; caspase-8                                                       | TSS5000;TSS5000;Body;Body;B   | 766      | CASP8        | caspase-8                                                                                     |
| GA    | cg26800893 | 1.41E-08 | 2.74E-05    | BF FDR0.01   | 11  | 67184596  | CARN51                         | carnosine synthase 1 isoform 2                                              | Body;Body                     | 1448     | CARN51       | carnosine synthase 1 isoform 2                                                                |
| GA    | cg26809643 | 4.90E-05 | 0.009942248 | FDR0.01      | 7   | 64023824  | ZNF680                         | zinc finger protein 680 isoform 2                                           | TSS1500;TSS1500               | -319     | ZNF680       | zinc finger protein 680 isoform 2                                                             |
| GA    | cg26818820 | 5.68E-09 | 1.44E-05    | BF FDR0.01   | 5   | 135468000 | SMAD5-AS1;SMAD5                | SMAD5 antisense RNA 1; mothers against decapentaplegic homolog 5            | Body;TSS1500;TSS1500;TSS150   | -533     | SMAD5        | mothers against decapentaplegic homolog 5                                                     |
| GA    | cg26828842 | 4.26E-06 | 0.001878844 | FDR0.01      | 18  | 67952086  | SOC56                          | suppressor of cytokine signaling 6                                          | TSS5000                       | -4194    | SOC56        | suppressor of cytokine signaling 6                                                            |
| GA    | cg26832406 | 3.15E-05 | 0.007488708 | FDR0.01      | 11  | 1499404   | CALCA                          | calcitonin isoform 1 preproprotein                                          | TSS200;TSS1500;TSS1500;TSS    | 148      | CALCA        | calcitonin isoform 1 preproprotein                                                            |
| GA    | cg26834679 | 6.71E-06 | 0.002611536 | FDR0.01      | 19  | 42706353  | DEDD2                          | DNA-binding death effector domain-containing protein 2                      | Body;Body;Body;Body;Body;Bo   | 15476    | DEDD2        | DNA-binding death effector domain-containing protein 2                                        |
| GA    | cg26851141 | 4.79E-06 | 0.002042069 | FDR0.01      | 16  | 58426274  | GINS3                          | DNA replication complex GINS protein PSF3                                   | TSS200;TSS200;TSS200          | -100     | GINS3        | DNA replication complex GINS protein PSF3                                                     |
| GA    | cg26861960 | 3.57E-05 | 0.008134104 | FDR0.01      | 12  | 104659097 | TXNRD1                         | thioredoxin reductase 1, cytoplasmic                                        | Body                          | -21712   | TXNRD1       | thioredoxin reductase 1, cytoplasmic                                                          |
| GA    | cg26878655 | 1.15E-06 | 0.000743425 | FDR0.01      | 17  | 38481877  | RARA                           | retinoic acid receptor alpha                                                | Body;Body;Body                | 7381     | RARA         | retinoic acid receptor alpha                                                                  |
| GA    | cg26908825 | 2.13E-05 | 0.00584688  | FDR0.01      | 6   | 1635818   | GMD5                           | GDP-mannose 4,6 dehydratase                                                 | Body;Body                     | 25669    | FOXCI        | forkhead box protein C1                                                                       |
| GA    | cg26916780 | 1.28E-05 | 0.004110581 | FDR0.01      | 15  | 64889554  | ZNF609                         | zinc finger protein 609                                                     | Body                          | 105926   | OAZ2         | ornithine decarboxylase antizyme 2                                                            |
| GA    | cg26925644 | 4.30E-06 | 0.00189565  | FDR0.01      | 11  | 118476517 | ARCN1;PHLDB1                   | coatamer subunit delta;pleckstrin homology-like domain family B member 1    | TSS5000;TSS5000;TSS1500;TSS   | -633     | PHLDB1       | pleckstrin homology-like domain family B member 1                                             |
| GA    | cg26929272 | 1.04E-05 | 0.003510259 | FDR0.01      | 10  | 88295210  |                                |                                                                             |                               | -13661   | WAPL         | wings apart-like protein homolog isoform 2                                                    |
| GA    | cg26933683 | 9.42E-07 | 0.000643996 | FDR0.01      | 17  | 61918738  | SMARCD2                        | SWI/SNF-related matrix-associated actin-dependent regulator of chromatin    | TSS5000;Body;Body             | 1088     | SMARCD2      | SWI/SNF-related matrix-associated actin-dependent regulator of chromatin subfamily D member 2 |
| GA    | cg26942169 | 3.55E-06 | 0.001654458 | FDR0.01      | 6   | 36566714  | SRSF3                          | serine/arginine-rich splicing factor 3                                      | Body;Body                     | 4576     | SRSF3        | serine/arginine-rich splicing factor 3                                                        |
| GA    | cg26956245 | 1.09E-07 | 0.000129873 | BF FDR0.01   | 7   | 30518972  | NOD1                           | nucleotide-binding oligomerization domain-containing protein 1              | TSS1500;TSS1500;TSS1500       | -490     | NOD1         | nucleotide-binding oligomerization domain-containing protein 1                                |
| GA    | cg26980034 | 7.34E-06 | 0.002771133 | FDR0.01      | 6   | 53530624  | KLHL31                         | kelch-like protein 31                                                       | TSS200                        | -70      | KLHL31       | kelch-like protein 31                                                                         |
| GA    | cg26981076 | 3.15E-05 | 0.007443746 | FDR0.01      | 11  | 59824116  | MSA43                          | membrane-spanning 4-domains subfamily A member 3 isoform c                  | 5'UTR;TSS200;TSS200           | 16       | MSA43        | membrane-spanning 4-domains subfamily A member 3 isoform c                                    |
| GA    | cg27022558 | 1.77E-05 | 0.005185963 | FDR0.01      | 11  | 64141041  | RPS6KA4;MIR1237                | ribosomal protein S6 kinase alpha-4; microRNA 1237                          | TSS5000;TSS5000;TSS5000;TES   | 4968     | MIR1237      | microRNA 1237                                                                                 |
| GA    | cg27024992 | 3.38E-06 | 0.001593362 | FDR0.01      | 2   | 48094603  | FBXO11                         | F-box only protein 11                                                       | Body;Body                     | 21255    | FBXO11       | F-box only protein 11                                                                         |
| GA    | cg27059598 | 1.38E-05 | 0.004342185 | FDR0.01      | 10  | 21797661  | SKIDA1                         | SKI/DACH domain-containing protein 1                                        | TSS5000                       | -11472   | MIR1915HG    | MIR1915 host gene                                                                             |
| GA    | cg27066899 | 3.07E-08 | 4.92E-05    | BF FDR0.01   | 13  | 51640362  | GYC1YB2                        | guanylate cyclase 1 soluble subunit beta 2 (pseudogene)                     | TSS200                        | -69      | GYC1YB2      | guanylate cyclase 1 soluble subunit beta 2 (pseudogene)                                       |
| GA    | cg27083484 | 9.52E-06 | 0.003151348 | FDR0.01      | 5   | 122506787 | PRDM6                          | putative histone-lysine N-methyltransferase PRDM6                           | Body                          | -80776   | LOC105379152 | uncharacterized LOC105379152                                                                  |
| GA    | cg27107685 | 9.83E-08 | 0.000120778 | BF FDR0.01   | 7   | 30590918  | GARS-DT                        |                                                                             | Body                          | 26477    | GARS-DT      | fibroblast growth factor 20                                                                   |
| GA    | cg27110277 | 1.74E-06 | 0.001005319 | FDR0.01      | 8   | 16860121  | FGF20                          | fibroblast growth factor 20                                                 | TSS1500                       | -267     | FGF20        | fibroblast growth factor 20                                                                   |
| GA    | cg27113548 | 5.47E-06 | 0.002260072 | FDR0.01      | 14  | 106354912 |                                |                                                                             |                               | -28925   | FAM30A       | family with sequence similarity 30 member A                                                   |
| GA    | cg27114509 | 7.74E-05 | 1.83E-05    | BF FDR0.01   | 15  | 92613280  | SLC03A1                        | solute carrier organic anion transporter family member 3A1                  | Body;Body;Body                | 21547    | SLC03A1      | solute carrier organic anion transporter family member 3A1                                    |
| GA    | cg27143082 | 4.86E-06 | 0.002065741 | FDR0.01      | 15  | 31744628  | VWA7;VAR51                     | von Willebrand factor A domain-containing protein 7 precursor;valine-1-RNA  | Body;TSS5000                  | 477      | VWA7         | von Willebrand factor A domain-containing protein 7 precursor                                 |
| GA    | cg27143204 | 1.51E-07 | 0.000164506 | FDR0.01      | 5   | 54530375  | CCNO                           | cyclin-O                                                                    | TSS5000;TSS5000;TSS1500;TSS   | -830     | CCNO         | cyclin-O                                                                                      |
| GA    | cg27145034 | 4.59E-08 | 6.55E-05    | BF FDR0.01   | 16  | 19179928  | SYT17                          | synaptotagmin-17                                                            | Body;5'UTR;TSS5000            | 367      | SYT17        | synaptotagmin-17                                                                              |
| GA    | cg27145042 | 3.83E-08 | 5.78E-05    | BF FDR0.01   | 16  | 25026956  | ARHGAP17                       | rho GTPase-activating protein 17 isoform 2                                  | TSS1500;TSS1500               | -266     | ARHGAP17     | rho GTPase-activating protein 17 isoform 2                                                    |
| GA    | cg27151174 | 1.16E-05 | 0.003814687 | FDR0.01      | 16  | 30367227  | CD2BP2;TBC1D108                | CD2 antigen cytoplasmic tail-binding protein 2;TBC1 domain family member    | TSS1500;TSS1500;TSS5000       | -598     | CD2BP2       | CD2 antigen cytoplasmic tail-binding protein 2                                                |
| GA    | cg27158340 | 6.03E-06 | 0.002426687 | FDR0.01      | 14  | 105603389 | JAG2                           | protein jagged-2 isoform b precursor                                        | TSS5000;TSS5000               | 13812    | MIR6765      | microRNA 6765                                                                                 |
| GA    | cg27165456 | 1.74E-08 | 3.13E-05    | BF FDR0.01   | 7   | 1782577   | ELFN1;ELFN1-AS1                | protein ELFN1 precursor;ELFN1 antisense RNA 1                               | Body;TSS1500;TSS1500;TSS150   | -631     | ELFN1-AS1    | ELFN1 antisense RNA 1                                                                         |
| GA    | cg27183791 | 1.45E-05 | 0.004486197 | FDR0.01      | 16  | 89381904  | ANKRD11                        | ankyrin repeat domain-containing protein 11                                 | Body;Body;Body;Body           | -5636    | LOC100287036 | uncharacterized LOC100287036                                                                  |
| GA    | cg27194211 | 5.73E-06 | 0.002336898 | FDR0.01      | 17  | 4503171   | SMTNL2                         | smoothelin-like protein 2 isoform 2                                         | Body;Body                     | -10572   | LINC01996    | long intergenic non-protein coding RNA 1996                                                   |
| GA    | cg27207079 | 3.52E-05 | 0.008054969 | FDR0.01      | 9   | 123656751 | PHF19                          | PHD finger protein 19                                                       | Body                          | 68219    | PHF19        | PHD finger protein 19                                                                         |
| GA    | cg27218993 | 1.04E-05 | 0.003155574 | FDR0.01      | 6   | 73263351  |                                |                                                                             |                               | -42123   | KCNQ5        | potassium voltage-gated channel subfamily KQT member 5                                        |
| GA    | cg27219317 | 2.50E-07 | 0.000238464 | FDR0.01      | 21  | 45683513  | DNMT3L                         | DNA (cytosine-5)-methyltransferase 3-like isoform 1                         | TSS5000;TSS5000               | -1783    | DNMT3L       | DNA (cytosine-5)-methyltransferase 3-like isoform 1                                           |
| GA    | cg27229243 | 5.56E-09 | 1.44E-05    | BF FDR0.01   | 2   | 101945867 |                                |                                                                             |                               | 19956    | MIR5696      | microRNA 5696                                                                                 |
| GA    | cg27268279 | 9.85E-07 | 0.000667688 | FDR0.01      | 10  | 71672083  | COL13A1                        | collagen alpha-1(XIII) chain                                                | Body;Body;Body;Body;Body;Bo   | 110422   | COL13A1      | collagen alpha-1(XIII) chain                                                                  |
| GA    | cg27275941 | 6.34E-06 | 0.002516915 | FDR0.01      | 3   | 15751015  | BTD;ANKRD28                    | biotinidase precursor;serine/threonine-protein phosphatase 6 regulatory an  | Body;Body;Body;Body;Body;Bo   | -12137   | MIR3134      | microRNA 3134                                                                                 |
| GA    | cg27277978 | 1.31E-06 | 0.000820198 | FDR0.01      | 16  | 30457458  | SEPHS2                         | selenide, water dikinase 2                                                  | TSS1500                       | -263     | SEPHS2       | selenide, water dikinase 2                                                                    |
| GA    | cg27281690 | 6.85E-06 | 0.002649337 | FDR0.01      | 2   | 7171963   | RNF144A                        | E3 ubiquitin-protein ligase RNF144A isoform 4                               | Body;Body;Body;Body;Body;Bo   | 46048    | LOC101929452 | uncharacterized LOC101929452                                                                  |
| GA    | cg27291385 | 1.82E-05 | 0.005277474 | FDR0.01      | 2   | 219266135 | SLC11A1;CTDSP1;MIR268          | neutral resistance-associated macrophage protein 1; carboxy-terminal doma   | TSS5000;Body;Body;Body;TSS1   | -1233    | MIR268       | microRNA 268                                                                                  |
| GA    | cg27293155 | 4.25E-06 | 0.001878223 | FDR0.01      | 2   | 38044012  |                                |                                                                             |                               | 12842    | LINC00211    | long intergenic non-protein coding RNA 211                                                    |
| GA    | cg27335649 | 2.50E-06 | 0.001286589 | FDR0.01      | 10  | 10953578  | CEL2F                          | CUGBP Elav-like family member 2                                             | Body;Body;Body;Body;Body;Bo   | 40548    | LINC00710    | long intergenic non-protein coding RNA 710                                                    |
| GA    | cg27340749 | 1.11E-07 | 0.000130831 | BF FDR0.01   | 3   | 48507385  | ATRIP;ATRIP-TREX1;TREX1;SHISA5 | ATR-interacting protein;ATRIP-TREX1 readthrough;three-prime repair exonu    | TSS5000;3'UTR;3'UTR;Body;3'U  | 157      | TREX1        | three-prime repair exonuclease 1 isoform c                                                    |
| GA    | cg27347434 | 4.69E-06 | 0.002016117 | FDR0.01      | 3   | 32726203  | CNOT10                         | CCR4-NOT transcription complex subunit 10 isoform 2                         | TSS1500;TSS1500;TSS1500       | -476     | CNOT10       | CCR4-NOT transcription complex subunit 10 isoform 2                                           |
| GA    | cg27366007 | 4.35E-06 | 0.001907572 | FDR0.01      | 15  | 91479184  | HDDC3;UNC45A                   | guanosine-3',5'-bis(diphosphate) 3'-pyrophosphohydrolase MESH1; protein u   | TSS5000;TSS5000;Body;TSS500   | 670      | UNC45A       | protein unc-45 homolog A                                                                      |
| GA    | cg27372422 | 3.13E-05 | 0.007420332 | FDR0.01      | 19  | 41086247  | SPTBN4;SHKBP1                  | spectrin beta chain, non-erythrocytic 4;SH3KBP1-binding protein 1           | TSS5000;Body                  | 3469     | SHKBP1       | SH3KBP1-binding protein 1                                                                     |
| GA    | cg27381584 | 2.00E-09 | 7.04E-06    | BF FDR0.01   | 17  | 80407749  | CYBC1                          | uncharacterized protein C1 Torf62 homolog                                   | TSS200;Body;Body;Body;Body;B  | -147     | CYBC1        | uncharacterized protein C1 Torf62 homolog                                                     |
| GA    | cg27391816 | 2.46E-06 | 0.001269693 | FDR0.01      | 1   | 1672644   | SLC35E2A                       | solute carrier family 35 member E2A isoform 1                               | Body;Body                     | 4794     | SLC35E2A     | solute carrier family 35 member E2A isoform 1                                                 |
| GA    | cg27407971 | 2.69E-05 | 0.0067632   |              |     |           |                                |                                                                             |                               |          |              |                                                                                               |

| Trait | #cpg       | p        | fdr         | significance | chr | pos.hg19  | gene.illumina     | gene.description                                                                        | locations                       | dist2TSS | gene.nearest | gene.description                                                             |
|-------|------------|----------|-------------|--------------|-----|-----------|-------------------|-----------------------------------------------------------------------------------------|---------------------------------|----------|--------------|------------------------------------------------------------------------------|
| GA    | cg27475522 | 2.94E-05 | 0.00717409  | FDR0.01      | 10  | 17496930  | ST8SIA6           | alpha-2,8-sialyltransferase 8F precursor                                                | TSS1500;TSS1500;TSS1500         | -336     | ST8SIA6      | alpha-2,8-sialyltransferase 8F precursor                                     |
| GA    | cg27478224 | 1.15E-05 | 0.003792405 | FDR0.01      | 10  | 91061115  | IFIT2             | interferon-induced protein with tetratricopeptide repeats 2                             | TSS1500                         | -687     | IFIT2        | interferon-induced protein with tetratricopeptide repeats 2                  |
| GA    | cg27478579 | 1.33E-07 | 0.000149935 | FDR0.01      | 2   | 55497012  | MTIF2             | translation initiation factor IF-2, mitochondrial isoform b                             | TSS1500;TSS1500;TSS1500;TSS1500 | -628     | MTIF2        | translation initiation factor IF-2, mitochondrial isoform b                  |
| GA    | cg27479634 | 4.66E-05 | 0.009597224 | FDR0.01      | 12  | 54070545  | ATP5MC2           | ATP synthase F(0) complex subunit C2, mitochondrial precursor                           | TSS1500;TSS1500;TSS1500;TSS1500 | -433     | ATP5MC2      | ATP synthase F(0) complex subunit C2, mitochondrial precursor                |
| GA    | cg27488648 | 2.15E-05 | 0.005864506 | FDR0.01      | 11  | 118477034 | ARCN1;PHLDB1      | coatamer subunit delta;pleckstrin homology-like domain family B member 1                | TESS000;TESS000;TSS200;TSS1500  | -116     | PHLDB1       | pleckstrin homology-like domain family B member 1                            |
| GA    | cg27494111 | 9.71E-06 | 0.00354909  | FDR0.01      | 19  | 12369491  |                   |                                                                                         |                                 | 35946    | ZNF44        | zinc finger protein 44 isoform 2                                             |
| GA    | cg27508055 | 8.28E-06 | 0.003024832 | FDR0.01      | 2   | 19286187  |                   |                                                                                         |                                 | -59461   | LINC01376    | long intergenic non-protein coding RNA 1376                                  |
| GA    | cg27513684 | 6.04E-06 | 0.002426612 | FDR0.01      | 1   | 272729053 | WASF2             | wiskott-Aldrich syndrome protein family member 2                                        | TESS000;TESS000                 | 9928     | GPR3         | G-protein coupled receptor 3                                                 |
| GA    | cg27514777 | 3.19E-07 | 0.000291111 | FDR0.01      | 16  | 14377664  |                   |                                                                                         |                                 | -18480   | MIR193BHG    | MIR193b-365a host gene                                                       |
| GA    | cg27518892 | 4.83E-05 | 0.009828595 | FDR0.01      | 16  | 57566936  | CCDC102A          | coiled-coil domain-containing protein 102A                                              | Body                            | 3547     | CCDC102A     | coiled-coil domain-containing protein 102A                                   |
| GA    | cg27536187 | 4.39E-05 | 0.009244415 | FDR0.01      | 1   | 2159365   | SKI               | ski oncogene                                                                            | TSS1500                         | -392     | SKI          | ski oncogene                                                                 |
| GA    | cg27539234 | 4.67E-07 | 0.000384991 | FDR0.01      | 17  | 7218945   | EIF5A;GPS2;NEURL4 | eukaryotic translation initiation factor 5A-1 isoform A;G protein pathway suppressor 2  | TESS000;TESS000;TESS000;TESS000 | -266     | GPS2         | G protein pathway suppressor 2                                               |
| GA    | cg27558541 | 1.48E-05 | 0.004545404 | FDR0.01      | 1   | 110350324 |                   |                                                                                         |                                 | -43779   | EP5L3        | epidermal growth factor receptor kinase substrate 8-like protein 3 isoform c |
| GA    | cg27565899 | 7.09E-06 | 0.002709346 | FDR0.01      | 1   | 110166664 | AMPD2             | AMP deaminase 2                                                                         | Body;Body;Body;Body;5'UTR       | 55       | AMPD2        | AMP deaminase 2                                                              |
| GA    | cg27574980 | 8.69E-07 | 0.00060416  | FDR0.01      | 6   | 31744636  | VWA7;VAR51        | von Willebrand factor A domain-containing protein 7 precursor;valine-tRNA synthetase 51 | Body;TESS000                    | 469      | VWA7         | von Willebrand factor A domain-containing protein 7 precursor                |
| GA    | cg27615366 | 2.42E-05 | 0.006311797 | FDR0.01      | 5   | 131592974 | PDLIM4            | PDZ and LIM domain protein 4                                                            | TSS1500;TSS1500                 | -376     | PDLIM4       | PDZ and LIM domain protein 4                                                 |
| GA    | cg27640064 | 2.61E-05 | 0.00648876  | FDR0.01      | 7   | 4752983   | FOXK1             | forkhead box protein K1                                                                 | Body                            | 31058    | FOXK1        | forkhead box protein K1                                                      |
| GA    | cg27659768 | 1.25E-05 | 0.00405281  | FDR0.01      | 16  | 71523436  | ZNF19             | zinc finger protein 19                                                                  | TSS1500                         | -209     | ZNF19        | zinc finger protein 19                                                       |
| BW    | cg24399376 | 3.14E-09 | 0.001405879 | BF FDR0.01   | 11  | 2005497   | MRPL23-AS1        | MRPL23 antisense RNA 1                                                                  | Body                            | 5653     | MRPL23-AS1   | MRPL23 antisense RNA 1                                                       |
| BW    | cg26866325 | 8.74E-08 | 0.013540645 | BF FDR0.01   | 4   | 74920559  | PBPBP2            | pro-platelet basic protein pseudogene 2                                                 | Body                            | 557      | PBPBP2       | pro-platelet basic protein pseudogene 2                                      |
| BW    | cg08821669 | 9.08E-08 | 0.013540645 | BF FDR0.01   | 12  | 120875978 | COX6A1            | cytochrome c oxidase subunit 6A1, mitochondrial                                         | 1stExon                         | 63       | COX6A1       | cytochrome c oxidase subunit 6A1, mitochondrial                              |
